# Supplementary material for: Reversal of enantioselectivity by tuning the ring size of ProPhenol
Source: Royal Society of Chemistry journal article supplement (doi:10.1039/d4qo00668b), 2024-01-01
Supplement: d4qo00668b1.pdf [file d4qo00668b1.pdf]

# Supplementary Information

## Reversal of Enantioselectivity by Tuning the Ring Size of ProPhenol

Xu-Yi Huang,<sup>†§</sup> Na Li,<sup>‡+§</sup> Yu-Hang Miao,<sup>†§</sup> Yuan-Zhao Hua,<sup>†</sup> Min-Can Wang,<sup>\*†</sup> Li-Ping Xu,<sup>\*‡</sup> and Guang-Jian Mei<sup>\*†#</sup>

<sup>†</sup> College of Chemistry, Zhengzhou University, Zhengzhou, 450001, China.

<sup>#</sup> Pingyuan Laboratory (Zhengzhou University), Zhengzhou, 450001, China.

<sup>‡</sup> School of Chemistry and Chemical Engineering, Shandong University, Jinan, 250100, China.

<sup>+</sup> Warshel Institute for Computational Biology, School of Medicine, The Chinese University of Hong Kong, Shenzhen, Guangdong, 518172, China

<sup>§</sup> These authors contributed equally to this work.

## Contents

|                                                                                                       |      |
|-------------------------------------------------------------------------------------------------------|------|
| 1. General information.....                                                                           | S3   |
| 2. Representative procedures .....                                                                    | S4   |
| 3. General procedures .....                                                                           | S6   |
| 4. Derivatization of <b>3</b> into compounds <b>3'</b> .....                                          | S23  |
| 5. Synthesis of <b>L4-3</b> .....                                                                     | S26  |
| 6. Control experiments.....                                                                           | S30  |
| 7. X-ray single crystal data for compound ( <i>S</i> )- <b>3n'</b> and ( <i>R</i> )- <b>3n'</b> ..... | S32  |
| 8. Density functional theory studies .....                                                            | S34  |
| 9. HPLC spectra.....                                                                                  | S124 |
| 10. NMR spectra .....                                                                                 | S178 |
| 11. References.....                                                                                   | S220 |

## 1. General information

All reactions were carried out in oven-dried glassware with magnetic stirring. Reagents were obtained from commercial supplier and used without further purification unless otherwise noted. Solvents were dried with standard methods and freshly distilled prior to use if needed. All reactions sensitive to air or moisture were carried out under nitrogen using standard Schlenk and vacuum line techniques. NMR spectra were recorded on a 400 MHz NMR spectrometer with CDCl<sub>3</sub> and DMSO as the solvent and TMS as an internal standard (400 MHz for <sup>1</sup>H and 100 MHz for <sup>13</sup>C). HRMS were determined on a Q-TOF Micro LC/MS System ESI spectrometer. Enantiomeric excesses values were determined with HPLC (chiral column; mobile phase hexane/*i*-PrOH). 3-(dibenzylamino)phenols **1**<sup>[1]</sup> and *N*-(benzo[*d*]thiazol-2-yl)-1-phenylmethanimines **2**<sup>[2]</sup> were either employed directly from commercial sources or prepared according to the literature.

## 2. Representative procedures

### 1) Effect of ligands (Table S1)

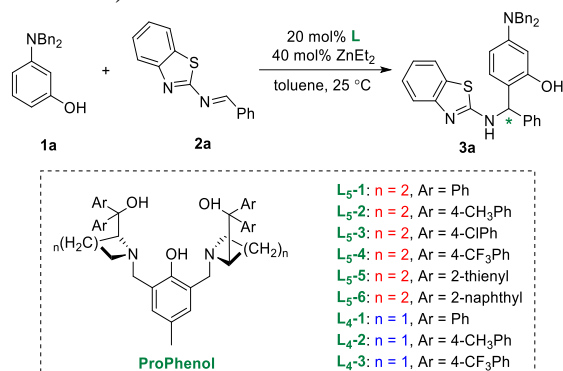

| Entry <sup>a</sup> | Ligand            | Time (h) | Yield (%) <sup>b</sup> | ee (%) <sup>c</sup> |
|--------------------|-------------------|----------|------------------------|---------------------|
| 1                  | L <sub>5</sub> -1 | 24       | 60                     | 30 (R)              |
| 2                  | L <sub>5</sub> -2 | 24       | 56                     | 18 (R)              |
| 3                  | L <sub>5</sub> -3 | 24       | 65                     | 59 (R)              |
| 4                  | L <sub>5</sub> -4 | 24       | 87                     | 60 (R)              |
| 5                  | L <sub>5</sub> -5 | 24       | 55                     | 14 (R)              |
| 6                  | L <sub>5</sub> -6 | 24       | 55                     | 17 (R)              |
| 7                  | L <sub>4</sub> -1 | 24       | 42                     | 12 (S)              |
| 8                  | L <sub>4</sub> -2 | 24       | 43                     | 10 (S)              |
| 9                  | L <sub>4</sub> -3 | 24       | 93                     | 84 (S)              |

<sup>a</sup>Reaction conditions: **1a** (0.05 mmol), **2a** (0.075 mmol), ligands (20 mol%), **ZnEt<sub>2</sub>** (40 mol%) in a specified solvent (1 mL) under N<sub>2</sub> at 25 °C for 24 h. <sup>b</sup>Isolated yields. <sup>c</sup>Determined by chiral HPLC analysis.

### 2) Effect of solvents (Table S2)

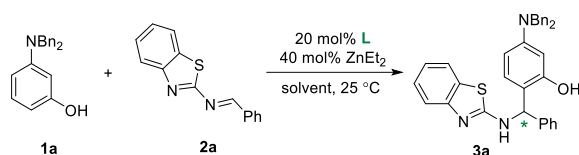

| Entry <sup>a</sup> | Solvent                         | Time (h) | Yield (%) <sup>b</sup> | ee (%) <sup>c</sup> |
|--------------------|---------------------------------|----------|------------------------|---------------------|
| 1                  | CH <sub>2</sub> Cl <sub>2</sub> | 24       | 82/95                  | 40 (R)/96 (S)       |
| 2                  | CH <sub>3</sub> CN              | 24       | 72/70                  | 79 (R)/89 (S)       |
| 3                  | THF                             | 24       | 86/85                  | 85 (R)/80 (S)       |
| 4                  | Toluene                         | 24       | 87/93                  | 60 (R)/84 (S)       |
| 5                  | CHCl <sub>3</sub>               | 24       | 68/65                  | 37 (R)/87 (S)       |
| 6                  | 1,4-dioxane                     | 24       | 77/69                  | 35 (R)/85 (S)       |

<sup>a</sup>Reaction conditions: **1a** (0.05 mmol), **2a** (0.075 mmol), ligand (20 mol%), **ZnEt<sub>2</sub>** (40 mol%) in a specified solvent (1 mL) under N<sub>2</sub> at 25 °C for 24 h. <sup>b</sup>Isolated yields. <sup>c</sup>Determined by chiral HPLC analysis.

### 3) Effect of additives (Table S3)

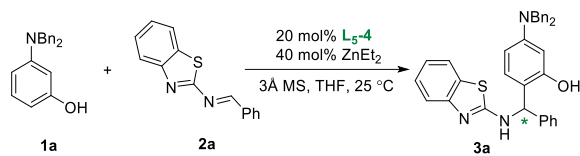

| Entry <sup>a</sup> | Additive (20mg) | Time (h) | Yield (%) <sup>b</sup> | ee (%) <sup>c</sup> |
|--------------------|-----------------|----------|------------------------|---------------------|
| 1                  | None            | 24       | 86                     | 85 ( <i>R</i> )     |
| 2                  | 3Å MS           | 24       | 92                     | 92 ( <i>R</i> )     |
| 3                  | 4Å MS           | 24       | 56                     | 46 ( <i>R</i> )     |
| 4                  | 5Å MS           | 24       | 48                     | 37 ( <i>R</i> )     |

<sup>a</sup>Reaction conditions: **1a** (0.05 mmol), **2a** (0.075 mmol), ligand (20 mol%),  $\text{ZnEt}_2$  (40 mol%) in a specified solvent (1 mL) under  $\text{N}_2$  at 25 °C for 24 h. <sup>b</sup>Isolated yields. <sup>c</sup>Determined by chiral HPLC analysis.

### 3. General procedures

#### 1) Synthesis of **S-3**

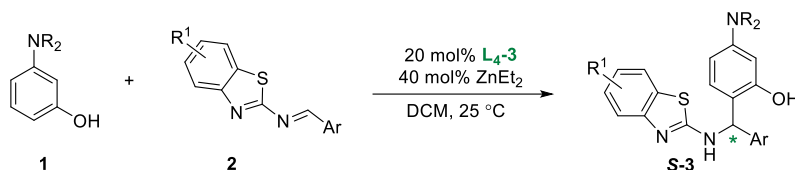

In a flame-dried Schlenk tube, a solution of diethylzinc (0.04 mL, 1.0 mol/L in hexane, 0.02 mmol) was added to a solution of the chiral ligand **L4-3** (0.02 mmol) in dry DCM (2.0 mL) under nitrogen at 25 °C. The mixture was stirred at 25 °C for 30 min. Then, 3-(dibenzylamino)phenol **1** (0.1 mmol) and *N*-(benzo[*d*]thiazol-2-yl)-1-phenylmethanimine **2** (0.15 mmol) were added under an argon atmosphere. The solution was stirred at 25 °C for 24 h, and then quenched with aqueous NH<sub>4</sub>Cl (5 mL), and extracted three times with EA (3 × 10 mL). The combined organics was washed with brine before being dried by MgSO<sub>4</sub>, filtered and concentrated in vacuo. The crude product was separated by flash column chromatography on silica gel (petroleum ether/ethyl acetate 8:1).

#### 2) Synthesis of **R-3**

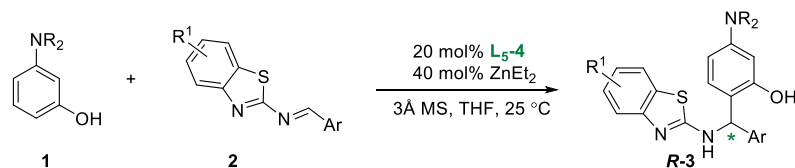

In a flame-dried Schlenk tube, a solution of diethylzinc (0.04 mL, 1.0 mol/L in hexane, 0.02 mmol) was added to a solution of the chiral ligand **L5-4** (0.02 mmol) and 3 Å MS (40 mg) in dry THF (2.0 mL) under nitrogen at 25 °C. The mixture was stirred at 25 °C for 30 min. Then, 3-(dibenzylamino)phenol **1** (0.1 mmol) and *N*-(benzo[*d*]thiazol-2-yl)-1-phenylmethanimine **2** (0.15 mmol) were added under an argon atmosphere. The solution was stirred at 25 °C for 24 h, and then quenched with aqueous NH<sub>4</sub>Cl (5 mL), and extracted three times with EA (3 × 10 mL). The combined organics was washed with brine before being dried by MgSO<sub>4</sub>, filtered and concentrated in vacuo. The crude product was separated by flash column chromatography on silica gel (petroleum ether/ethyl acetate 8:1).

**(S)-2-((benzo[d]thiazol-2-ylamino)(phenyl)methyl)-5-(dibenzylamino)phenol 3a:**

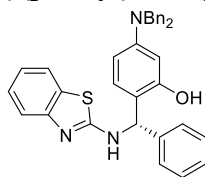

(S)-3a

White solid, M.p.: 156 – 157 °C; yield: 95%;  $[\alpha]_D^{20} = -150$  (*c* 0.1, CH<sub>2</sub>Cl<sub>2</sub>); HPLC (Chiralpak IC, *i*-propanol/hexane = 10/90, flow rate 1.0 mL/min,  $\lambda = 254$  nm),  $t_1 = 6.39$  min (minor),  $t_2 = 8.12$  min (major), *ee* = 96%; <sup>1</sup>H NMR (400 MHz, DMSO)  $\delta$  9.36 (s, 1H), 8.63 (d, *J* = 8.3 Hz, 1H), 7.65 – 7.63 (m, 1H), 7.37 – 7.16 (m, 17H), 7.01 – 6.99 (m, 1H), 6.86 (d, *J* = 8.6 Hz, 1H), 6.42 (d, *J* = 8.2 Hz, 1H), 6.23 (d, *J* = 2.4 Hz, 1H), 6.16 – 6.13 (m, 1H), 4.62 (s, 4H); <sup>13</sup>C NMR (100 MHz, DMSO)  $\delta$  165.7, 155.6, 152.8, 149.2, 143.8, 139.5, 130.9, 129.0, 128.6, 127.3, 127.2, 127.0, 126.9, 125.9, 121.3, 118.5, 117.2, 103.9, 99.6, 55.3, 54.5. HRMS (ESI) calcd for C<sub>34</sub>H<sub>30</sub>N<sub>3</sub>OS<sup>+</sup> [M+H]<sup>+</sup> 528.2104, found 528.2102.

**(R)-2-((benzo[d]thiazol-2-ylamino)(phenyl)methyl)-5-(dibenzylamino)phenol 3a:**

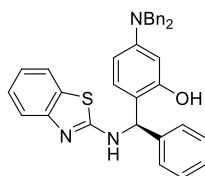

(R)-3a

White solid, yield: 92%;  $[\alpha]_D^{20} = +146$  (*c* 0.42, CH<sub>2</sub>Cl<sub>2</sub>); HPLC (Chiralpak IC, *i*-propanol/hexane = 10/90, flow rate 1.0 mL/min,  $\lambda = 254$  nm),  $t_1 = 6.39$  min (major),  $t_2 = 8.14$  min (minor), *ee* = 92%.

**(S)-2-((benzo[d]thiazol-2-ylamino)(*p*-tolyl)methyl)-5-(dibenzylamino)phenol 3b:**

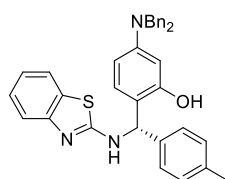

(S)-3b

White solid, M.p.: 109 – 110 °C; yield: 94%;  $[\alpha]_D^{20} = -281$  (*c* 0.1, CH<sub>2</sub>Cl<sub>2</sub>); HPLC (Chiralpak IC, *i*-propanol/hexane = 10/90, flow rate 1.0 mL/min,  $\lambda = 254$  nm),  $t_1 = 7.03$  min (minor),  $t_2 = 8.74$  min (major), *ee* = 95%; <sup>1</sup>H NMR (400 MHz, DMSO)  $\delta$  9.29 (s, 1H), 8.56 (d, *J* = 8.3 Hz, 1H), 7.64 – 7.62 (m, 1H), 7.35 - 7.31 (m, 5H), 7.27 – 7.16 (m, 9H), 7.08 (d, *J* = 8.0 Hz, 2H), 7.00 – 6.96 (m, 1H), 6.84 (d, *J* = 8.6 Hz, 1H), 6.35 (d, *J* = 8.2 Hz, 1H), 6.21 (d, *J* = 2.4 Hz, 1H), 6.15 – 6.12 (m, 1H), 4.62 (s, 4H), 2.24 (s, 3H); <sup>13</sup>C NMR (100 MHz, DMSO)  $\delta$  165.8, 155.6, 152.9, 149.1, 140.8, 139.5, 135.9, 131.0, 129.1, 129.0, 127.2, 127.2, 127.0, 125.9, 121.3, 121.3, 118.4, 117.4, 104.8, 99.6, 55.1, 54.5, 21.1. HRMS (ESI) calcd for C<sub>35</sub>H<sub>32</sub>N<sub>3</sub>OS<sup>+</sup> [M+H]<sup>+</sup> 542.2261, found 542.2268.

**(R)-2-((benzo[d]thiazol-2-ylamino)(p-tolyl)methyl)-5-(dibenzylamino)phenol 3b:**

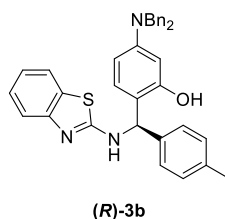

White solid, yield: 89%;  $[\alpha]_D^{20} = +268$  (*c* 0.1, CH<sub>2</sub>Cl<sub>2</sub>); HPLC (Chiralpak IC, *i*-propanol/hexane = 10/90, flow rate 1.0 mL/min,  $\lambda = 254$  nm),  $t_1 = 7.27$  min (major),  $t_2 = 9.14$  min (minor), *ee* = 92%.

**(S)-2-((benzo[d]thiazol-2-ylamino)(4-fluorophenyl)methyl)-5-(dibenzylamino)phenol 3c:**

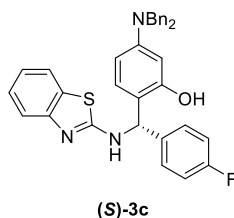

White solid, M.p.: 100 – 111 °C; yield: 91%;  $[\alpha]_D^{20} = -111$  (*c* 0.1, CH<sub>2</sub>Cl<sub>2</sub>); HPLC (Chiralpak IC, *i*-propanol/hexane = 10/90, flow rate 1.0 mL/min,  $\lambda = 254$  nm),  $t_1 = 5.71$  min (minor),  $t_2 = 7.70$  min (major), *ee* = 92%; <sup>1</sup>H NMR (400 MHz, DMSO)  $\delta$  9.37 (s, 1H), 8.64 (d, *J* = 8.2 Hz, 1H), 7.66 – 7.63 (m, 1H), 7.40 – 7.31 (m, 7H), 7.28 – 7.09 (m, 9H), 7.02 – 6.98 (m, 1H), 6.88 (d, *J* = 8.6 Hz, 1H), 6.41 (d, *J* = 8.2 Hz, 1H), 6.27 – 6.12 (m, 2H), 4.63 (s, 4H); <sup>13</sup>C NMR (100 MHz, DMSO)  $\delta$  165.8, 162.6, 160.2 (*J* = 241 Hz), 155.6, 152.8, 149.2, 140.0, 139.9, 139.5, 139.4, 130.9, 129.2, 129.1, 129.0, 128.8, 127.2, 127.0, 126.0, 121.4, 121.3, 118.5, 117.0, 115.4, 115.2, 104.0, 99.6, 54.9, 54.6; <sup>19</sup>F NMR (376 MHz, DMSO)  $\delta$  -116.59; HRMS (ESI) calcd for C<sub>34</sub>H<sub>29</sub>FN<sub>3</sub>OS<sup>+</sup> [M+H]<sup>+</sup> 546.2010, found 546.2008.

**(R)-2-((benzo[d]thiazol-2-ylamino)(4-fluorophenyl)methyl)-5-(dibenzylamino)phenol 3c:**

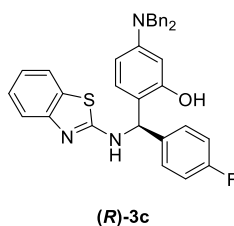

White solid, yield: 90%;  $[\alpha]_D^{20} = +136$  (*c* 0.1, CH<sub>2</sub>Cl<sub>2</sub>); HPLC (Chiralpak IC, *i*-propanol/hexane = 10/90, flow rate 1.0 mL/min,  $\lambda = 254$  nm),  $t_1 = 5.79$  min (major),  $t_2 = 7.51$  min (minor), *ee* = 98%.



**(S)-2-((benzo[d]thiazol-2-ylamino)(4-chlorophenyl)methyl)-5-(dibenzylamino)phenol 3d:**

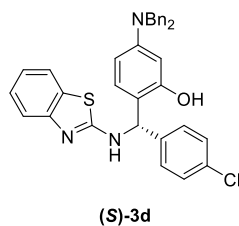

White solid, M.p.: 127 – 128 °C; yield: 96%;  $[\alpha]_D^{20} = -106$  (*c* 0.1, CH<sub>2</sub>Cl<sub>2</sub>); HPLC (Chiralpak IC, *i*-propanol/hexane = 10/90, flow rate 1.0 mL/min,  $\lambda = 254$  nm),  $t_1 = 5.91$  min (minor),  $t_2 = 8.30$  min (major), *ee* = 91%; <sup>1</sup>H NMR (400 MHz, DMSO)  $\delta$  9.42 (s, 1H), 8.63 (d, *J* = 8.1 Hz, 1H), 7.67 – 7.58 (m, 1H), 7.39 – 7.28 (m, 9H), 7.27 – 7.14 (m, 7H), 7.02 – 7.00 (m, 1H), 6.85 (d, *J* = 8.6 Hz, 1H), 6.40 (d, *J* = 8.0 Hz, 1H), 6.24 (d, *J* = 2.1 Hz, 1H), 6.16 – 6.14 (m, 1H), 4.62 (s, 4H); <sup>13</sup>C NMR (100 MHz, DMSO)  $\delta$  165.8, 155.6, 152.7, 149.3, 142.8, 139.4, 131.4, 130.9, 129.1, 129.0, 128.5, 127.2, 127.0, 126.0, 121.5, 121.3, 118.6, 116.7, 104.1, 99.6, 55.0, 54.5; HRMS (ESI) calcd for C<sub>34</sub>H<sub>29</sub>ClN<sub>3</sub>OS<sup>+</sup> [M+H]<sup>+</sup> 562.1714, found 562.1716.

**(R)-2-((benzo[d]thiazol-2-ylamino)(4-chlorophenyl)methyl)-5-(dibenzylamino)phenol 3d:**

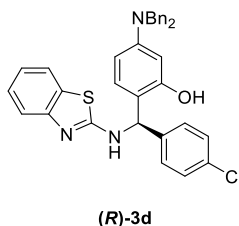

White solid; yield: 93%;  $[\alpha]_D^{20} = +137$  (*c* 0.1, CH<sub>2</sub>Cl<sub>2</sub>); HPLC (Chiralpak IC, *i*-propanol/hexane = 10/90, flow rate 1.0 mL/min,  $\lambda = 254$  nm),  $t_1 = 5.82$  min (major),  $t_2 = 7.79$  min (minor), *ee* = 97%.

**(S)-2-((benzo[d]thiazol-2-ylamino)(4-bromophenyl)methyl)-5-(dibenzylamino)phenol 3e:**

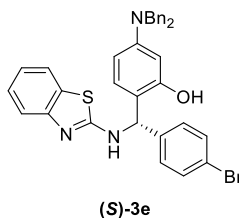

White solid, M.p.: 116 – 117 °C; yield: 90%;  $[\alpha]_D^{20} = -144$  (*c* 0.1, CH<sub>2</sub>Cl<sub>2</sub>); HPLC (Chiralpak IC, *i*-propanol/hexane = 10/90, flow rate 1.0 mL/min,  $\lambda = 254$  nm),  $t_1 = 6.13$  min (major),  $t_2 = 8.05$  min (minor), *ee* = 95%; <sup>1</sup>H NMR (400 MHz, DMSO)  $\delta$  9.40 (s, 1H), 8.63 (d, *J* = 8.1 Hz, 1H), 7.66 – 7.64 (m, 1H), 7.48 (d, *J* = 8.5 Hz, 2H), 7.35 – 7.17 (m, 14H), 7.02 – 6.98 (m, 2H), 6.39 (d, *J* = 8.0 Hz, 1H), 6.24 (d, *J* = 2.4 Hz, 1H), 6.17

– 6.14 (m, 1H), 4.63 (s, 4H);  $^{13}\text{C}$  NMR (100 MHz, DMSO)  $\delta$  165.8, 155.6, 152.8, 149.3, 143.3, 139.4, 131.5, 131.0, 129.5, 129.0, 127.2, 127.0, 126.0, 121.4, 121.3, 119.9, 118.7, 116.6, 104.0, 99.6, 55.0, 54.5; HRMS (ESI) calcd for  $\text{C}_{34}\text{H}_{29}\text{BrN}_3\text{OS}^+$   $[\text{M}+\text{H}]^+$  606.1209, found 606.1210.

**(R)-2-((benzo[d]thiazol-2-ylamino)(4-bromophenyl)methyl)-5-(dibenzylamino)phenol 3e:**

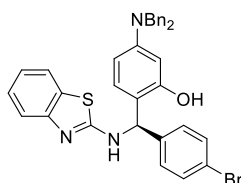

(R)-3e

White solid; yield: 85%;  $[\alpha]_{\text{D}}^{20} = +120$  ( $c$  0.1,  $\text{CH}_2\text{Cl}_2$ ); HPLC (Chiralpak IC, *i*-propanol/hexane = 10/90, flow rate 1.0 mL/min,  $\lambda = 254$  nm),  $t_1 = 6.46$  min (major),  $t_2 = 8.42$  min (minor),  $ee = 91\%$ .

**(S)-2-((benzo[d]thiazol-2-ylamino)(*m*-tolyl)methyl)-5-(dibenzylamino)phenol 3f:**

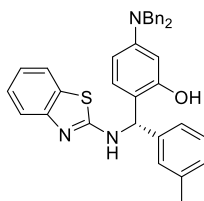

(S)-3f

White solid, M.p.: 100 – 101 °C; yield: 92%;  $[\alpha]_{\text{D}}^{20} = -171$  ( $c$  0.1,  $\text{CH}_2\text{Cl}_2$ ); HPLC (Chiralpak IC, *i*-propanol/hexane = 10/90, flow rate 1.0 mL/min,  $\lambda = 254$  nm),  $t_1 = 7.17$  min (minor),  $t_2 = 8.33$  min (major),  $ee = 80\%$ ;  $^1\text{H}$  NMR (400 MHz, DMSO)  $\delta$  9.32 (s, 1H), 8.58 (d,  $J = 8.3$  Hz, 1H), 7.64 – 7.62 (m, 1H), 7.37 – 7.29 (m, 5H), 7.27 – 7.09 (m, 10H), 7.02 – 6.95 (m, 2H), 6.85 (d,  $J = 8.6$  Hz, 1H), 6.38 (d,  $J = 8.2$  Hz, 1H), 6.25 – 6.10 (m, 2H), 4.61 (d,  $J = 6.5$  Hz, 4H), 2.25 (s, 3H);  $^{13}\text{C}$  NMR (100 MHz, DMSO)  $\delta$  165.9, 155.6, 152.9, 149.1, 143.8, 139.6, 139.5, 137.5, 131.0, 129.0, 128.5, 128.1, 127.9, 127.6, 127.2, 127.1, 127.0, 125.9, 124.4, 121.3, 118.4, 117.3, 104.0, 99.6, 55.3, 54.5, 21.6; HRMS (ESI) calcd for  $\text{C}_{35}\text{H}_{32}\text{N}_3\text{OS}^+$   $[\text{M}+\text{H}]^+$  542.2261, found 542.2266.

**(R)-2-((benzo[d]thiazol-2-ylamino)(*m*-tolyl)methyl)-5-(dibenzylamino)phenol 3f:**

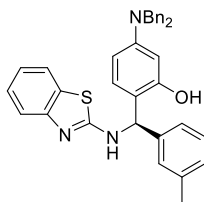

(R)-3f

White solid; yield: 91%;  $[\alpha]_D^{20} = +190$  (*c* 0.1, CH<sub>2</sub>Cl<sub>2</sub>); HPLC (Chiralpak IC, *i*-propanol/hexane = 10/90, flow rate 1.0 mL/min,  $\lambda = 254$  nm),  $t_1 = 6.62$  min (major),  $t_2 = 8.31$  min (minor), *ee* = 90%.

**(*S*)-2-((benzo[*d*]thiazol-2-ylamino)(3-chlorophenyl)methyl)-5-(dibenzylamino)phenol 3g:**

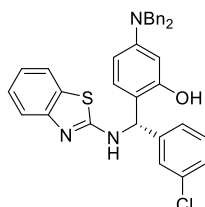

(*S*)-3g

White solid, M.p.: 135 – 136 °C; yield: 90%;  $[\alpha]_D^{20} = -367$  (*c* 0.1, CH<sub>2</sub>Cl<sub>2</sub>); HPLC (Chiralpak IC, *i*-propanol/hexane = 10/90, flow rate 1.0 mL/min,  $\lambda = 254$  nm),  $t_1 = 5.58$  min (minor),  $t_2 = 6.99$  min (major), *ee* = 90%; <sup>1</sup>H NMR (400 MHz, DMSO)  $\delta$  9.44 (s, 1H), 8.66 (d, *J* = 8.2 Hz, 1H), 7.64 (d, *J* = 7.3 Hz, 1H), 7.40 – 7.28 (m, 8H), 7.26 – 7.15 (m, 8H), 7.04 – 6.96 (m, 1H), 6.88 (d, *J* = 8.6 Hz, 1H), 6.43 (d, *J* = 8.1 Hz, 1H), 6.24 (d, *J* = 2.2 Hz, 1H), 6.17 – 6.15 (m, 1H), 4.62 (s, 4H); <sup>13</sup>C NMR (100 MHz, DMSO)  $\delta$  165.8, 155.6, 152.7, 149.4, 146.6, 139.4, 133.3, 131.0, 130.6, 129.0, 128.9, 127.2, 127.0, 126.9, 126.8, 126.0, 126.0, 121.5, 121.4, 118.6, 116.5, 104.1, 99.6, 55.1, 54.5; HRMS (ESI) calcd for C<sub>34</sub>H<sub>29</sub>ClN<sub>3</sub>OS<sup>+</sup> [M+H]<sup>+</sup> 562.1714, found 562.1718.

**(*R*)-2-((benzo[*d*]thiazol-2-ylamino)(3-chlorophenyl)methyl)-5-(dibenzylamino)phenol 3g:**

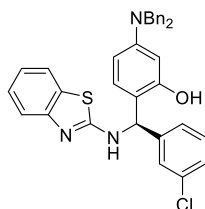

(*R*)-3g

White solid; yield: 83%;  $[\alpha]_D^{20} = +391$  (*c* 0.1, CH<sub>2</sub>Cl<sub>2</sub>); HPLC (Chiralpak IC, *i*-propanol/hexane = 10/90, flow rate 1.0 mL/min,  $\lambda = 254$  nm),  $t_1 = 5.52$  min (major),  $t_2 = 6.90$  min (minor), *ee* = 96%.

**(*S*)-2-((benzo[*d*]thiazol-2-ylamino)(*o*-tolyl)methyl)-5-(dibenzylamino)phenol 3h:**

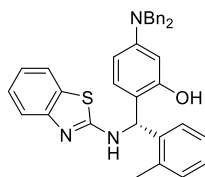

(*S*)-3h

White solid, M.p.: 105 – 106 °C; yield: 85%;  $[\alpha]_D^{20} = -127$  (*c* 0.1, CH<sub>2</sub>Cl<sub>2</sub>); HPLC (Chiralpak IC, *i*-propanol/hexane = 10/90, flow rate 1.0 mL/min,  $\lambda = 254$  nm),  $t_1 = 6.62$

min (minor),  $t_2 = 7.81$  min (major),  $ee = 90\%$ ;  $^1\text{H NMR}$  (400 MHz, DMSO)  $\delta$  9.32 (s, 1H), 8.49 (d,  $J = 7.9$  Hz, 1H), 7.65 – 7.58 (m, 1H), 7.40 – 7.09 (m, 16H), 6.99 (d,  $J = 7.7$  Hz, 1H), 6.69 (d,  $J = 8.6$  Hz, 1H), 6.45 (d,  $J = 7.8$  Hz, 1H), 6.23 (d,  $J = 2.4$  Hz, 1H), 6.17 – 6.09 (m, 1H), 4.62 (d,  $J = 7.6$  Hz, 4H), 2.22 (s, 3H);  $^{13}\text{C NMR}$  (100 MHz, DMSO)  $\delta$  165.6, 155.9, 152.9, 149.3, 141.6, 139.6, 139.5, 136.0, 130.9, 130.6, 129.1, 129.0, 127.2, 127.1, 127.1, 127.0, 127.0, 126.4, 126.0, 125.9, 121.3, 118.4, 115.9, 103.9, 99.6, 54.5, 52.6, 19.3; HRMS (ESI) calcd for  $\text{C}_{35}\text{H}_{32}\text{N}_3\text{OS}^+$   $[\text{M}+\text{H}]^+$  542.2261, found 542.2267.

**(R)-2-((benzo[d]thiazol-2-ylamino)(*o*-tolyl)methyl)-5-(dibenzylamino)phenol 3h:**

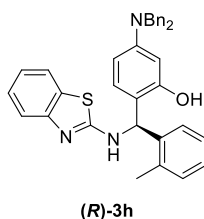

White solid; yield: 79%;  $[\alpha]_{\text{D}}^{20} = +111$  ( $c$  0.1,  $\text{CH}_2\text{Cl}_2$ ); HPLC (Chiralpak IC, *i*-propanol/hexane = 10/90, flow rate 1.0 mL/min,  $\lambda = 254$  nm),  $t_1 = 6.80$  min (major),  $t_2 = 7.81$  min (minor),  $ee = 78\%$ .

**(R)-2-((benzo[d]thiazol-2-ylamino)(2-chlorophenyl)methyl)-5-(dibenzylamino)phenol 3i:**

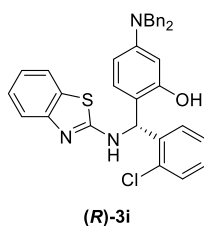

White solid, M.p.: 110 – 111 °C; yield: 97%;  $[\alpha]_{\text{D}}^{20} = -151$  ( $c$  0.1,  $\text{CH}_2\text{Cl}_2$ ); HPLC (Chiralpak IC, *i*-propanol/hexane = 5/95, flow rate 1.0 mL/min,  $\lambda = 254$  nm),  $t_1 = 10.12$  min (minor),  $t_2 = 13.76$  min (major),  $ee = 96\%$ ;  $^1\text{H NMR}$  (400 MHz, DMSO)  $\delta$  9.36 (s, 1H), 8.55 (d,  $J = 7.6$  Hz, 1H), 7.64 – 7.62 (m, 0.7 Hz, 1H), 7.46 – 7.39 (m, 2H), 7.35 – 7.16 (m, 14H), 7.03 – 6.95 (m, 1H), 6.59 (t,  $J = 8.1$  Hz, 2H), 6.26 (d,  $J = 2.4$  Hz, 1H), 6.13 – 6.10 (m, 1H), 4.63 (s, 4H);  $^{13}\text{C NMR}$  (100 MHz, DMSO)  $\delta$  165.6, 156.3, 152.9, 149.5, 140.7, 139.4, 133.1, 131.0, 130.0, 129.1, 129.0, 128.9, 128.7, 127.4, 127.2, 127.0, 125.9, 121.4, 121.3, 118.6, 115.0, 103.6, 99.6, 54.5, 53.3; HRMS (ESI) calcd for  $\text{C}_{34}\text{H}_{29}\text{ClN}_3\text{OS}^+$   $[\text{M}+\text{H}]^+$  562.1714, found 562.1715.

**(S)-2-((benzo[d]thiazol-2-ylamino)(2-chlorophenyl)methyl)-5-(dibenzylamino)phenol 3i:**

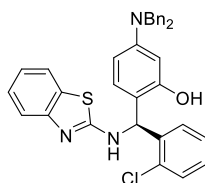

(S)-3i

White solid; yield: 75%;  $[\alpha]_D^{20} = +166$  (*c* 0.1, CH<sub>2</sub>Cl<sub>2</sub>); HPLC (Chiralpak IC, *i*-propanol/hexane = 5/95, flow rate 1.0 mL/min,  $\lambda = 254$  nm),  $t_1 = 10.18$  min (major),  $t_2 = 14.45$  min (minor), *ee* = 98%.

**(R)-2-((benzo[*d*]thiazol-2-ylamino)(2-bromophenyl)methyl)-5-(dibenzylamino)phenol 3j:**

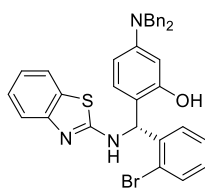

(R)-3j

White solid, M.p.: 149 – 150 °C; yield: 93%;  $[\alpha]_D^{20} = -170$  (*c* 0.1, CH<sub>2</sub>Cl<sub>2</sub>); HPLC (Chiralpak IC, *i*-propanol/hexane = 10/90, flow rate 1.0 mL/min,  $\lambda = 254$  nm),  $t_1 = 6.21$  min (minor),  $t_2 = 7.63$  min (major), *ee* = 97%; <sup>1</sup>H NMR (400 MHz, DMSO)  $\delta$  9.33 (s, 1H), 8.54 (d, *J* = 7.6 Hz, 1H), 7.64 – 7.57 (m, 2H), 7.42 – 7.16 (m, 15H), 7.05 – 6.91 (m, 1H), 6.56 – 6.50 (m, 2H), 6.26 (d, *J* = 2.3 Hz, 1H), 6.12 – 6.10 (m, 1H), 4.63 (s, 4H); <sup>13</sup>C NMR (100 MHz, DMSO)  $\delta$  165.4, 156.5, 152.3, 149.5, 142.1, 139.5, 133.2, 131.0, 129.2, 129.1, 129.0, 129.0, 127.9, 127.2, 127.1, 125.9, 124.0, 121.3, 118.6, 115.0, 103.6, 99.6, 55.8, 54.5; HRMS (ESI) calcd for C<sub>34</sub>H<sub>29</sub>BrN<sub>3</sub>OS<sup>+</sup> [M+H]<sup>+</sup> 606.1209, found 606.1212.

**(S)-2-((benzo[*d*]thiazol-2-ylamino)(2-bromophenyl)methyl)-5-(dibenzylamino)phenol 3j:**

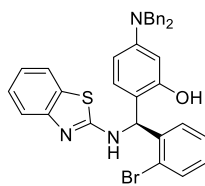

(S)-3j

White solid; yield: 88%;  $[\alpha]_D^{20} = +175$  (*c* 0.1, CH<sub>2</sub>Cl<sub>2</sub>); HPLC (Chiralpak IC, *i*-propanol/hexane = 10/90, flow rate 1.0 mL/min,  $\lambda = 254$  nm),  $t_1 = 6.12$  min (major),  $t_2 = 7.97$  min (minor), *ee* = 98%.

**(S)-2-(((5-chlorobenzo[*d*]thiazol-2-yl)amino)(phenyl)methyl)-5-(dibenzylamino)phenol 3k:**

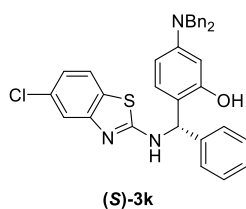

White solid, M.p.: 108 – 109 °C; yield: 90%;  $[\alpha]_D^{20} = -73$  (*c* 0.1, CH<sub>2</sub>Cl<sub>2</sub>); HPLC (Chiralpak ID, *i*-propanol/hexane = 30/70, flow rate 1.0 mL/min,  $\lambda = 254$  nm),  $t_1 = 8.56$  min (major),  $t_2 = 13.69$  min (minor), *ee* = 90%; <sup>1</sup>H NMR (400 MHz, DMSO)  $\delta$  9.31 (s, 1H), 8.81 (d, *J* = 8.2 Hz, 1H), 7.65 (d, *J* = 8.3 Hz, 1H), 7.39 – 7.12 (m, 16H), 7.01 – 6.99 (m, 1H), 6.81 (d, *J* = 8.6 Hz, 1H), 6.38 (d, *J* = 8.0 Hz, 1H), 6.20 (d, *J* = 2.4 Hz, 1H), 6.14 – 6.12 (m, 1H), 4.61 (s, 4H); <sup>13</sup>C NMR (100 MHz, DMSO)  $\delta$  167.4, 155.6, 154.2, 149.2, 143.5, 139.4, 130.6, 129.7, 129.0, 128.6, 127.2, 127.2, 127.0, 122.5, 121.0, 117.9, 116.9, 103.9, 99.5, 88.1, 55.5, 54.5; HRMS (ESI) calcd for C<sub>34</sub>H<sub>29</sub>ClN<sub>3</sub>OS<sup>+</sup> [M+H]<sup>+</sup> 562.1714, found 562.1713.

**(R)-2-(((5-chlorobenzo[*d*]thiazol-2-yl)amino)(phenyl)methyl)-5-(dibenzylamino)phenol 3k:**

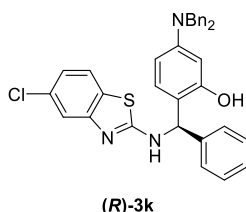

White solid; yield: 82%;  $[\alpha]_D^{20} = +100$  (*c* 0.1, CH<sub>2</sub>Cl<sub>2</sub>); HPLC (Chiralpak ID, *i*-propanol/hexane = 30/70, flow rate 1.0 mL/min,  $\lambda = 254$  nm),  $t_1 = 8.61$  min (major),  $t_2 = 13.59$  min (minor), *ee* = 98%.

**(S)-5-(dibenzylamino)-2-(((6-methylbenzo[*d*]thiazol-2-yl)amino)(phenyl)methyl)phenol 3l:**

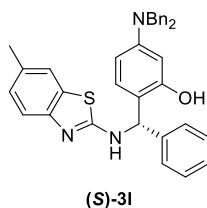

White solid, M.p.: 151 – 152 °C; yield: 91%;  $[\alpha]_D^{20} = -85$  (*c* 0.1, CH<sub>2</sub>Cl<sub>2</sub>); HPLC (Chiralpak IC, *i*-propanol/hexane = 10/90, flow rate 1.0 mL/min,  $\lambda = 254$  nm),  $t_1 = 7.76$  min (minor),  $t_2 = 8.98$  min (major), *ee* = 60%; <sup>1</sup>H NMR (400 MHz, DMSO)  $\delta$  9.35 (s, 1H), 8.52 (d, *J* = 8.4 Hz, 1H), 7.44 (s, 1H), 7.36 – 7.17 (m, 16H), 7.01 – 6.99 (m, 1H), 6.88 (d, *J* = 8.6 Hz, 1H), 6.41 (d, *J* = 8.3 Hz, 1H), 6.23 (d, *J* = 2.2 Hz, 1H), 6.16 – 6.14 (m, 1H), 4.62 (s, 4H), 2.30 (s, 3H); <sup>13</sup>C NMR (100 MHz, DMSO)  $\delta$  165.2, 155.6, 150.7, 149.2, 143.9, 139.5, 131.0, 130.4, 129.0, 128.5, 127.3, 127.2, 127.0, 126.9, 126.8, 121.3, 118.1, 117.4, 104.0, 99.6, 55.3, 54.5, 21.2; HRMS (ESI) calcd for C<sub>35</sub>H<sub>32</sub>N<sub>3</sub>OS<sup>+</sup> [M+H]<sup>+</sup> 542.2261, found 542.2261.

**(R)-5-(dibenzylamino)-2-(((6-methylbenzo[d]thiazol-2-yl)amino)(phenyl)methyl)phenol 3l:**

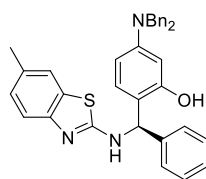

(R)-3l

White solid; yield: 85%;  $[\alpha]_D^{20} = +123$  (*c* 0.1, CH<sub>2</sub>Cl<sub>2</sub>); HPLC (Chiralpak IC, *i*-propanol/hexane = 10/90, flow rate 1.0 mL/min,  $\lambda = 254$  nm),  $t_1 = 7.69$  min (major),  $t_2 = 8.92$  min (minor), *ee* = 96%.

**(S)-5-(dibenzylamino)-2-(((6-fluorobenzo[d]thiazol-2-yl)amino)(phenyl)methyl)phenol 3m:**

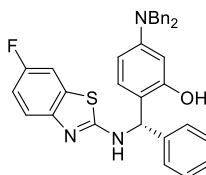

(S)-3m

White solid, M.p.: 131 – 132 °C; yield: 93%;  $[\alpha]_D^{20} = -156$  (*c* 0.1, CH<sub>2</sub>Cl<sub>2</sub>); HPLC (Chiralpak ID, *i*-propanol/hexane = 30/70, flow rate 1.0 mL/min,  $\lambda = 254$  nm),  $t_1 = 7.54$  min (minor),  $t_2 = 8.71$  min (major), *ee* = 94%; <sup>1</sup>H NMR (400 MHz, DMSO)  $\delta$  9.33 (s, 1H), 8.61 (d, *J* = 8.2 Hz, 1H), 7.59 – 7.56 (m, 1H), 7.33 – 7.23 (m, 16H), 7.04 – 7.01 (m, 1H), 6.84 (d, *J* = 8.6 Hz, 1H), 6.39 (d, *J* = 8.2 Hz, 1H), 6.22 (d, *J* = 2.1 Hz, 1H), 6.16 – 6.13 (m, 1H), 4.62 (s, 4H); <sup>13</sup>C NMR (100 MHz, DMSO)  $\delta$  165.7, 158.8, 156.4 (*J* = 235 Hz), 155.6, 149.6, 149.2, 143.7, 139.5, 132.0, 132.0, 129.0, 128.6, 127.3, 127.2, 127.0, 126.9, 126.5, 118.9, 118.8, 117.1, 113.3, 113.0, 108.4, 108.1, 103.9, 99.6, 55.4, 54.5; <sup>19</sup>F NMR (376 MHz, DMSO)  $\delta$  -122.25; HRMS (ESI) calcd for C<sub>34</sub>H<sub>29</sub>FN<sub>3</sub>OS<sup>+</sup> [M+H]<sup>+</sup> 546.2010, found 546.2012.

**(R)-5-(dibenzylamino)-2-(((6-fluorobenzo[d]thiazol-2-yl)amino)(phenyl)methyl)phenol 3m:**

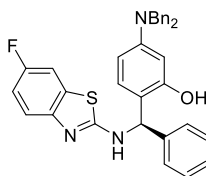

(R)-3m

White solid; yield: 84%;  $[\alpha]_D^{20} = +158$  (*c* 0.1, CH<sub>2</sub>Cl<sub>2</sub>); HPLC (Chiralpak ID, *i*-propanol/hexane = 30/70, flow rate 1.0 mL/min,  $\lambda = 254$  nm),  $t_1 = 7.61$  min (major),  $t_2 = 8.80$  min (minor), *ee* = 95%.

**(S)-2-(((6-chlorobenzo[*d*]thiazol-2-yl)amino)(phenyl)methyl)-5-(dibenzylamino)phenol 3n:**

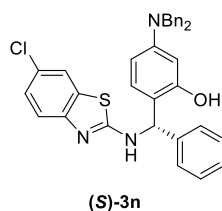

White solid, M.p.: 139 – 140 °C; yield: 90%;  $[\alpha]_D^{20} = -458$  (*c* 0.1, CH<sub>2</sub>Cl<sub>2</sub>); HPLC (Chiralpak ID *i*-propanol/hexane = 30/70, flow rate 1.0 mL/min,  $\lambda = 254$  nm),  $t_1 = 7.87$  min (minor),  $t_2 = 10.60$  min (major), *ee* = 92%; <sup>1</sup>H NMR (400 MHz, DMSO)  $\delta$  9.35 (s, 1H), 8.76 (d, *J* = 8.2 Hz, 1H), 7.77 (d, *J* = 2.2 Hz, 1H), 7.40 – 7.16 (m, 17H), 6.84 (d, *J* = 8.6 Hz, 1H), 6.42 (d, *J* = 7.9 Hz, 1H), 6.24 (d, *J* = 1.6 Hz, 1H), 6.16 – 6.14 (m, 1H), 4.62 (d, *J* = 7.1 Hz, 4H); <sup>13</sup>C NMR (100 MHz, DMSO)  $\delta$  166.4, 155.5, 151.9, 149.2, 143.6, 139.4, 132.7, 129.0, 128.6, 128.2, 127.3, 127.2, 127.0, 127.0, 126.6, 126.0, 125.0, 121.0, 119.3, 117.0, 104.0, 99.6, 55.5, 54.5.; HRMS (ESI) calcd for C<sub>34</sub>H<sub>29</sub>ClN<sub>3</sub>OS<sup>+</sup> [M+H]<sup>+</sup> 562.1714, found 562.1722.

**(R)-2-(((6-chlorobenzo[*d*]thiazol-2-yl)amino)(phenyl)methyl)-5-(dibenzylamino)phenol 3n:**

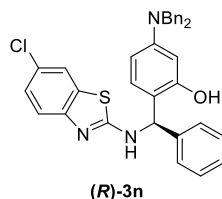

White solid; yield: 88%;  $[\alpha]_D^{20} = +478$  (*c* 0.1, CH<sub>2</sub>Cl<sub>2</sub>); HPLC (Chiralpak ID *i*-propanol/hexane = 30/70, flow rate 1.0 mL/min,  $\lambda = 254$  nm),  $t_1 = 7.87$  min (major),  $t_2 = 10.82$  min (minor), *ee* = 96%.

**(S)-2-(((benzo[*d*]thiazol-2-yl)amino)(phenyl)methyl)-5-(bis(2-fluorobenzyl)amino)phenol 3o:**

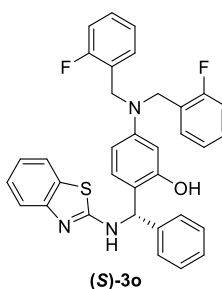

White solid, M.p.: 143 – 144 °C; yield: 89%;  $[\alpha]_D^{20} = -137$  (*c* 0.1, CH<sub>2</sub>Cl<sub>2</sub>); HPLC (Chiralpak IC, *i*-propanol/hexane = 10/90, flow rate 1.0 mL/min,  $\lambda = 254$  nm),  $t_1 = 5.53$  min (minor),  $t_2 = 6.76$  min (major), *ee* = 64%; <sup>1</sup>H NMR (400 MHz, DMSO)  $\delta$  9.40 (s, 1H), 8.64 (d, *J* = 8.3 Hz, 1H), 7.72 – 7.59 (m, 1H), 7.39 – 7.10 (m, 15H), 7.03 – 6.97 (m, 1H), 6.91 (d, *J* = 8.5 Hz, 1H), 6.43 (d, *J* = 8.2 Hz, 1H), 6.27 – 6.10 (m, 2H), 4.69 (s, 4H); <sup>13</sup>C NMR (100 MHz, DMSO)  $\delta$  165.9, 162.0, 159.6 (*J* = 242 Hz), 155.7, 152.8,



148.5, 143.70 130.9, 129.2, 129.2, 129.1, 128.9, 128.8, 128.6, 127.3, 126.9, 125.9, 125.9, 125.7, 124.9, 124.9, 121.3, 121.3, 118.5, 117.8, 115.9, 115.7, 103.8, 99.6, 55.4, 48.8, 48.7;  $^{19}\text{F}$  NMR (376 MHz, DMSO)  $\delta$  -118.11.; HRMS (ESI) calcd for  $\text{C}_{34}\text{H}_{28}\text{F}_2\text{N}_3\text{OS}^+ [\text{M}+\text{H}]^+$  564.1916, found 564.1926.

**((R)-2-((benzo[*d*]thiazol-2-ylamino)(phenyl)methyl)-5-(bis(2-fluorobenzyl)amino) phenol 3o:**

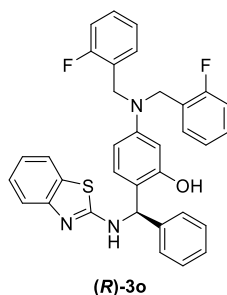

White solid; yield: 69%;  $[\alpha]_{\text{D}}^{20} = +157$  (*c* 0.1,  $\text{CH}_2\text{Cl}_2$ ); HPLC (Chiralpak IC, *i*-propanol/hexane = 10/90, flow rate 1.0 mL/min,  $\lambda = 254$  nm),  $t_1 = 5.49$  min (major),  $t_2 = 6.50$  min (minor), *ee* = 70%.

**(S)-2-((benzo[*d*]thiazol-2-ylamino)(phenyl)methyl)-5-(bis(3-methylbenzyl)amino) phenol 3p:**

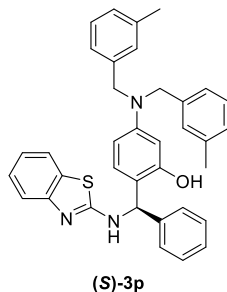

White solid, M.p.: 140 – 141 °C; yield: 93%;  $[\alpha]_{\text{D}}^{20} = -123$  (*c* 0.1,  $\text{CH}_2\text{Cl}_2$ ); HPLC (Chiralpak ID, *i*-propanol/hexane = 20/80, flow rate 1.0 mL/min,  $\lambda = 254$  nm),  $t_1 = 11.70$  min (minor),  $t_2 = 13.58$  min (major), *ee* = 92%;  $^1\text{H}$  NMR (400 MHz, DMSO)  $\delta$  9.35 (s, 1H), 8.61 (d, *J* = 8.3 Hz, 1H), 7.68 – 7.57 (m, 1H), 7.37 – 7.13 (m, 9H), 7.09 – 6.95 (m, 7H), 6.85 (d, *J* = 8.6 Hz, 1H), 6.40 (d, *J* = 8.3 Hz, 1H), 6.20 (d, *J* = 2.3 Hz, 1H), 6.14 – 6.11 (m, 1H), 4.56 (s, 4H), 2.26 (s, 6H);  $^{13}\text{C}$  NMR (100 MHz, DMSO)  $\delta$  165.9, 155.5, 152.8, 149.2, 143.8, 139.5, 138.04, 130.9, 128.9, 128.6, 127.9, 127.6, 127.3, 126.9, 125.9, 124.1, 121.3, 118.4, 117.1, 103.9, 99.5, 55.6, 54.5, 21.6; HRMS (ESI) calcd for  $\text{C}_{36}\text{H}_{34}\text{N}_3\text{OS}^+ [\text{M}+\text{H}]^+$  556.2417, found 556.2424.

**(R)-2-((benzo[*d*]thiazol-2-ylamino)(phenyl)methyl)-5-(bis(3-methylbenzyl)amino) phenol 3p:**

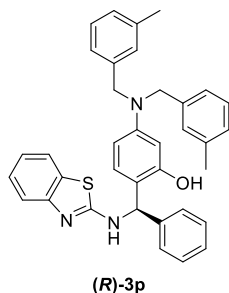

White solid; yield: 83%;  $[\alpha]_D^{20} = +141$  (*c* 0.1, CH<sub>2</sub>Cl<sub>2</sub>); HPLC (Chiralpak ID, *i*-propanol/hexane = 20/80, flow rate 1.0 mL/min,  $\lambda = 254$  nm),  $t_1 = 11.62$  min (major),  $t_2 = 13.68$  min (minor), *ee* = 92%.

**(S)-2-((benzo[*d*]thiazol-2-ylamino)(phenyl)methyl)-5-(bis(3-bromobenzyl)amino) phenol 3q:**

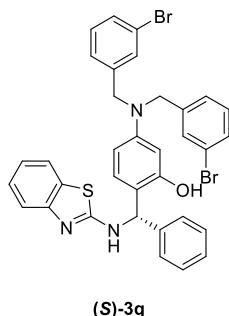

White solid, M.p.: 144 – 145 °C; yield: 88%;  $[\alpha]_D^{20} = -76$  (*c* 0.1, CH<sub>2</sub>Cl<sub>2</sub>); HPLC (Chiralpak IC, *i*-propanol/hexane = 10/90, flow rate 1.0 mL/min,  $\lambda = 254$  nm),  $t_1 = 6.42$  min (minor),  $t_2 = 7.60$  min (major), *ee* = 92%; <sup>1</sup>H NMR (400 MHz, DMSO)  $\delta$  9.39 (s, 1H), 8.63 (d, *J* = 8.3 Hz, 1H), 7.64 (d, *J* = 7.7 Hz, 1H), 7.53 – 7.12 (m, 15H), 6.99 (t, *J* = 7.6 Hz, 1H), 6.88 (d, *J* = 8.5 Hz, 1H), 6.43 (d, *J* = 8.2 Hz, 1H), 6.24 – 6.12 (m, 2H), 4.65 (s, 4H); <sup>13</sup>C NMR (100 MHz, DMSO)  $\delta$  165.8, 155.7, 152.8, 148.5, 143.7, 142.6, 131.2, 130.9, 130.1, 129.7, 129.1, 128.6, 127.3, 126.9, 126.1, 125.9, 122.4, 121.3, 118.5, 117.7, 103.9, 99.6, 55.3, 54.1; HRMS (ESI) calcd for C<sub>34</sub>H<sub>28</sub>Br<sub>2</sub>N<sub>3</sub>OS<sup>+</sup> [M+H]<sup>+</sup> 684.0314, found 684.0308.

**(R)-2-((benzo[*d*]thiazol-2-ylamino)(phenyl)methyl)-5-(bis(3-bromobenzyl)amino) phenol 3q:**

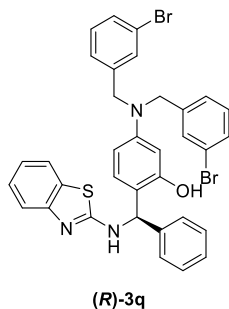

White solid; yield: 84%;  $[\alpha]_D^{20} = +87$  (*c* 0.1, CH<sub>2</sub>Cl<sub>2</sub>); HPLC (Chiralpak IC, *i*-propanol/hexane = 10/90, flow rate 1.0 mL/min,  $\lambda = 254$  nm),  $t_1 = 6.65$  min (major),  $t_2 =$

= 7.86 min (minor), *ee* = 96%.

**(*S*)-2-((benzo[*d*]thiazol-2-ylamino)(phenyl)methyl)-5-(bis(4-chlorobenzyl)amino)phenol 3r:**

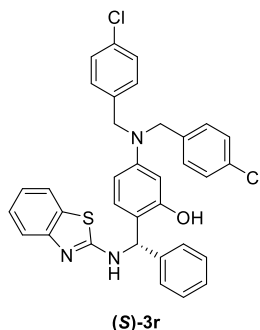

White solid, M.p.: 145 – 146 °C; yield: 93%;  $[\alpha]_D^{20} = -45$  (*c* 0.1, CH<sub>2</sub>Cl<sub>2</sub>); HPLC (Chiralpak IC, *i*-propanol/hexane = 10/90, flow rate 1.0 mL/min,  $\lambda = 254$  nm), *t*<sub>1</sub> = 6.19 min (minor), *t*<sub>2</sub> = 7.19 min (major), *ee* = 70%; <sup>1</sup>H NMR (400 MHz, CDCl<sub>3</sub>)  $\delta$  9.35 (s, 1H), 8.63 (d, *J* = 8.4 Hz, 1H), 7.64 (d, *J* = 7.2 Hz, 1H), 7.46 – 7.12 (m, 15H), 7.03 – 6.93 (m, 1H), 6.88 (d, *J* = 8.5 Hz, 1H), 6.42 (d, *J* = 8.3 Hz, 1H), 6.22 – 6.06 (m, 2H), 4.60 (s, 4H); <sup>13</sup>C NMR (100 MHz, CDCl<sub>3</sub>)  $\delta$  170.6, 160.3, 157.6, 153.4, 148.4, 143.2, 136.4, 135.7, 133.7, 133.3, 132.0, 131.7, 130.6, 126.1, 123.2, 122.3, 108.7, 104.4, 60.1, 58.7; HRMS (ESI) calcd for C<sub>34</sub>H<sub>28</sub>Cl<sub>2</sub>N<sub>3</sub>OS<sup>+</sup> [M+H]<sup>+</sup> 596.1325, found 596.1329.

**(*R*)-2-((benzo[*d*]thiazol-2-ylamino)(phenyl)methyl)-5-(bis(4-chlorobenzyl)amino)phenol 3r:**

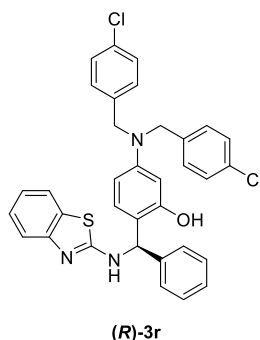

White solid; yield: 87%;  $[\alpha]_D^{20} = +55$  (*c* 0.1, CH<sub>2</sub>Cl<sub>2</sub>); HPLC (Chiralpak IC, *i*-propanol/hexane = 10/90, flow rate 1.0 mL/min,  $\lambda = 254$  nm), *t*<sub>1</sub> = 6.59 min (mor), *t*<sub>2</sub> = 7.65 min (minor), *ee* = 96%.

**(*S*)-2-((benzo[*d*]thiazol-2-ylamino)(phenyl)methyl)-5-(bis(4-bromobenzyl)amino)phenol 3s:**

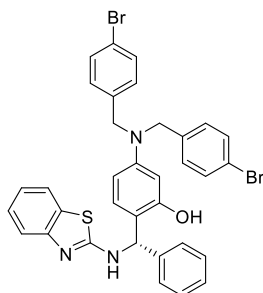

(S)-3s

White solid, M.p.: 154 – 155 °C; yield: 90%;  $[\alpha]_D^{20} = -95$  (*c* 0.1, CH<sub>2</sub>Cl<sub>2</sub>); HPLC (Chiralpak IC, *i*-propanol/hexane = 10/90, flow rate 1.0 mL/min,  $\lambda = 254$  nm),  $t_1 = 7.04$  min (minor),  $t_2 = 8.10$  min (major), *ee* = 80%; <sup>1</sup>H NMR (400 MHz, DMSO)  $\delta$  9.36 (s, 1H), 8.62 (d, *J* = 8.4 Hz, 1H), 7.63 (d, *J* = 7.2 Hz, 1H), 7.51 (d, *J* = 8.4 Hz, 4H), 7.36 – 7.16 (m, 11H), 7.01 – 6.90 (m, 1H), 6.86 (d, *J* = 8.5 Hz, 1H), 6.39 (d, *J* = 8.2 Hz, 1H), 6.18 – 6.04 (m, 2H), 4.57 (s, 4H); <sup>13</sup>C NMR (100 MHz, DMSO)  $\delta$  165.8, 155.6, 152.8, 148.6, 143.7, 138.9, 131.8, 130.9, 129.3, 129.0, 128.6, 127.3, 126.9, 125.9, 121.3, 120.1, 118.5, 117.6, 104.0, 99.7, 55.3, 54.0; HRMS (ESI) calcd for C<sub>34</sub>H<sub>28</sub>Br<sub>2</sub>N<sub>3</sub>OS<sup>+</sup> [M+H]<sup>+</sup> 684.0314, found 684.0310.

**(R)-2-((benzo[*d*]thiazol-2-ylamino)(phenyl)methyl)-5-(bis(4-bromobenzyl)amino)phenol 3s:**

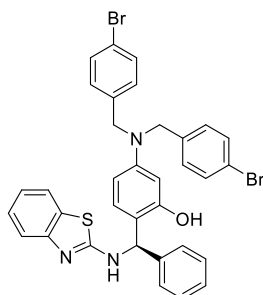

(R)-3s

White solid; yield: 85%;  $[\alpha]_D^{20} = +127$  (*c* 0.1, CH<sub>2</sub>Cl<sub>2</sub>); HPLC (Chiralpak IC, *i*-propanol/hexane = 10/90, flow rate 1.0 mL/min,  $\lambda = 254$  nm),  $t_1 = 6.87$  min (major),  $t_2 = 7.90$  min (minor), *ee* = 98%.

**(S)-2-((benzo[*d*]thiazol-2-ylamino)(phenyl)methyl)-5-(benzylamino)phenol 3t:**

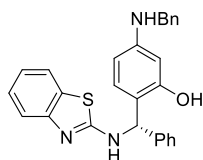

(S)-3t

White solid, M.p.: 134 – 135 °C; yield: 88%;  $[\alpha]_D^{20} = -83$  (*c* 0.1, CH<sub>2</sub>Cl<sub>2</sub>); HPLC (Chiralpak IC, *i*-propanol/hexane = 30/70, flow rate 1.0 mL/min,  $\lambda = 254$  nm),  $t_1 = 4.83$  min (minor),  $t_2 = 5.42$  min (major), *ee* = 60%; <sup>1</sup>H NMR (400 MHz, DMSO)  $\delta$  9.27 (s, 1H), 8.58 (d, *J* = 8.3 Hz, 1H), 7.64 (d, *J* = 7.3 Hz, 1H), 7.37 – 7.15 (m, 12H), 7.05 – 6.95 (m, 1H), 6.80 (d, *J* = 8.4 Hz, 1H), 6.38 (d, *J* = 8.3 Hz, 1H), 6.20 – 6.17 (m, 1H), 6.09 (d, *J* = 2.1 Hz, 1H), 6.05 – 6.02 (m, 1H), 4.20 (d, *J* = 6.0 Hz, 2H); <sup>13</sup>C NMR (100

MHz, DMSO)  $\delta$  165.9, 155.5, 152.8, 149.4, 144.0, 140.9, 130.9, 128.8, 128.7, 128.5, 127.5, 127.3, 127.0, 126.8, 125.9, 121.3, 118.4, 116.8, 104.2, 99.5, 55.4, 46.9; HRMS (ESI) calcd for  $C_{27}H_{24}N_3OS^+$   $[M+H]^+$  438.1635, found 438.1636.

**(R)-2-((benzo[d]thiazol-2-ylamino)(phenyl)methyl)-5-(benzylamino)phenol 3t:**

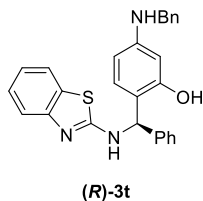

White solid; yield: 86%;  $[\alpha]_D^{20} = +117$  (*c* 0.1,  $CH_2Cl_2$ ); HPLC (Chiralpak IC, *i*-propanol/hexane = 30/70, flow rate 1.0 mL/min,  $\lambda = 254$  nm),  $t_1 = 4.88$  min (major),  $t_2 = 5.50$  min (minor), *ee* = 96%.

**(S)-2-((benzo[d]oxazol-2-ylamino)(phenyl)methyl)-5-(dibenzylamino)phenol 3u:**

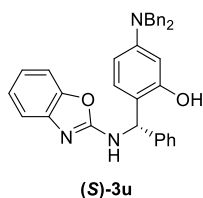

White solid, M.p.: 185 – 186 °C; yield: 90%;  $[\alpha]_D^{20} = -110$  (*c* 0.1,  $CH_2Cl_2$ ); HPLC (Chiralpak ID, *i*-propanol/hexane = 30/70, flow rate 1.0 mL/min,  $\lambda = 254$  nm),  $t_1 = 8.37$  min (minor),  $t_2 = 11.93$  min (major), *ee* = 86%;  $^1H$  NMR (400 MHz, DMSO)  $\delta$  9.33 (s, 1H), 8.62 (d, *J* = 9.0 Hz, 1H), 7.37 – 7.15 (m, 17H), 7.11 – 7.05 (m, 1H), 6.98 – 6.89 (m 2H), 6.28 (d, *J* = 8.9 Hz, 1H), 6.20 (d, *J* = 2.3 Hz, 1H), 6.14 – 6.11 (m, 1H), 4.62 (s, 4H);  $^{13}C$  NMR (100 MHz, DMSO)  $\delta$  162.3, 155.5, 149.2, 148.4, 143.6, 139.5, 129.0, 128.8, 128.6, 127.3, 127.1, 127.0, 127.0, 124.0, 120.6, 117.0, 115.9, 109.0, 103.91 99.5, 54.5, 54.3; HRMS (ESI) calcd for  $C_{34}H_{30}N_3O_2^+$   $[M+H]^+$  512.2333, found 512.2336.

**(R)-2-((benzo[d]oxazol-2-ylamino)(phenyl)methyl)-5-(dibenzylamino)phenol 3u:**

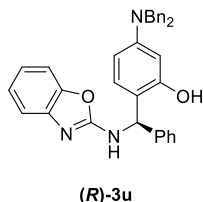

White solid; yield: 79%;  $[\alpha]_D^{20} = +98$  (*c* 0.1,  $CH_2Cl_2$ ); HPLC (Chiralpak ID, *i*-propanol/hexane = 30/70, flow rate 1.0 mL/min,  $\lambda = 254$  nm),  $t_1 = 8.51$  min (major),  $t_2 = 11.89$  min (minor), *ee* = 71%;

**(R)-2-(((4-chlorobenzo[d]thiazol-2-yl)amino)(phenyl)methyl)-5-(dibenzylamino)phenol 3v:**

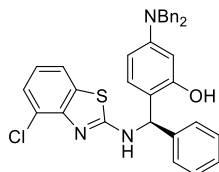

(R)-3v

White solid, M.p.: 170 – 171 °C; yield: 82%;  $[\alpha]_D^{20} = +168$  (*c* 0.1, CH<sub>2</sub>Cl<sub>2</sub>); HPLC (Chiralpak ID, *i*-propanol/hexane = 10/90, flow rate 1.0 mL/min,  $\lambda = 254$  nm),  $t_1 = 15.27$  min (minor),  $t_2 = 19.05$  min (major), *ee* = 92%; <sup>1</sup>H NMR (400 MHz, DMSO)  $\delta$  9.37 (s, 1H), 8.96 (d, *J* = 8.4 Hz, 1H), 7.63 – 7.61 (m, 1H), 7.44 – 7.12 (m, 17H), 7.03–6.98 (m, 1H), 6.88 (d, *J* = 8.6 Hz, 1H), 6.22 (d, *J* = 2.4 Hz, 1H), 6.16 – 6.14 (m, 1H), 4.62 (s, 4H); <sup>13</sup>C NMR (100 MHz, DMSO)  $\delta$  155.6, 149.6, 149.3, 143.4, 139.4, 132.2, 129.0, 128.9, 128.6, 127.3, 127.2, 127.0, 126.1, 122.0, 121.9, 120.3, 116.8, 104.0, 99.5, 55.8, 54.5; HRMS (ESI) calcd for C<sub>34</sub>H<sub>29</sub>ClN<sub>3</sub>OS<sup>+</sup> [M+H]<sup>+</sup> 562.1714, found 562.1717.

**(R)-2-(((4-chlorobenzothiazol-2-yl)amino)(phenyl)methyl)-5-(dibenzylamino)phenol 3v:**

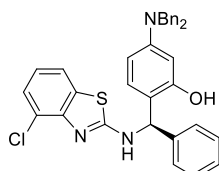

(R)-3v

White solid; yield: 90%;  $[\alpha]_D^{20} = +124$  (*c* 0.1, CH<sub>2</sub>Cl<sub>2</sub>); HPLC (Chiralpak ID, *i*-propanol/hexane = 10/90, flow rate 1.0 mL/min,  $\lambda = 254$  nm),  $t_1 = 15.25$  min (minor),  $t_2 = 19.11$  min (major), *ee* = 59%.

#### 4. Derivatization of 3 into compounds 3'

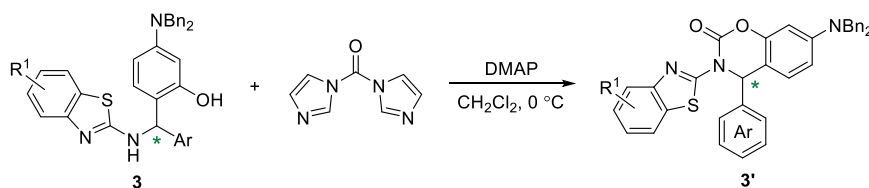

To the solution of 1,1'-carbonyldiimidazole (0.3 mmol, 1.1 eq.), DMAP (0.04 mmol, 0.2 eq) in dry dichloromethane (2 mL), then, compounds **3** (0.2 mmol) were added to the reaction mixture, which were stirred at 0 °C. After the completion of the reaction, which were indicated by TLC, the reaction mixture were purified through preparative thin layer chromatography on silica gel (petroleum ether/ethyl acetate = 8:1) to afford pure products **3'**.

#### *(S)*-3-(benzo[*d*]thiazol-2-yl)-7-(dibenzylamino)-4-(*p*-tolyl)-3,4-dihydro-2*H*-benzo[*e*][1,3]oxazin-2-one **3b'**:

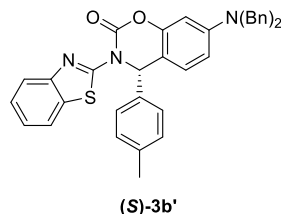

White solid, M.p.: 138 – 139 °C; yield: 94%;  $[\alpha]_{\text{D}}^{20} = -66$  (*c* 0.1, CH<sub>2</sub>Cl<sub>2</sub>); HPLC (Chiralpak ID, *i*-propanol/hexane = 30/70, flow rate 1.0 mL/min,  $\lambda = 254$  nm), *t*<sub>1</sub> = 10.74 min (major), *t*<sub>2</sub> = 11.53 min (minor), *ee* = 90%; <sup>1</sup>H NMR (400 MHz, DMSO)  $\delta$  7.98 (d, *J* = 7.8 Hz, 1H), 7.77 (d, *J* = 8.0 Hz, 1H), 7.47 – 7.37 (m, 1H), 7.36 – 7.19 (m, 14H), 7.13 – 7.04 (m, 3H), 6.57 – 6.54 (m, 1H), 6.46 (d, *J* = 2.4 Hz, 1H), 4.74 (s, 4H), 2.17 (s, 3H); <sup>13</sup>C NMR (100 MHz, DMSO)  $\delta$  159.4, 149.7, 149.6, 148.7, 148.6, 138.9, 137.7, 133.4, 130.0, 129.1, 127.8, 127.4, 127.0, 126.8, 126.1, 124.8, 122.1, 121.7, 110.2, 110.0, 99.2, 60.2, 54.8, 21.0; HRMS (ESI) calcd for C<sub>36</sub>H<sub>30</sub>N<sub>3</sub>O<sub>2</sub>S<sup>+</sup> [M+H]<sup>+</sup> 567.1980, found 567.1988.

#### *(S)*-3-(benzo[*d*]thiazol-2-yl)-4-(4-chlorophenyl)-7-(dibenzylamino)-3,4-dihydro-2*H*-benzo[*e*][1,3]oxazin-2-one **3d'**:

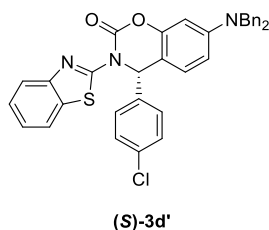

White solid, M.p.: 174 – 175 °C; yield: 95%;  $[\alpha]_{\text{D}}^{20} = -110$  (*c* 0.1, CH<sub>2</sub>Cl<sub>2</sub>); HPLC (Chiralpak IC, *i*-propanol/hexane = 10/90, flow rate 1.0 mL/min,  $\lambda = 254$  nm), *t*<sub>1</sub> = 11.58 min (major), *t*<sub>2</sub> = 12.48 min (minor), *ee* = 91%; <sup>1</sup>H NMR (400 MHz, DMSO)  $\delta$  7.97 (d,

$J = 7.8$  Hz, 1H), 7.76 (d,  $J = 8.1$  Hz, 1H), 7.44 – 7.19 (m, 17H), 7.12 (s, 1H), 6.58 – 6.55 (m, 1H), 6.47 (d,  $J = 2.3$  Hz, 1H), 4.73 (s, 4H);  $^{13}\text{C}$  NMR (100 MHz, DMSO)  $\delta$  159.3, 149.7, 149.4, 148.8, 148.5, 140.7, 138.8, 133.4, 133.0, 129.5, 129.1, 128.2, 127.80, 127.4, 127.0, 126.8, 124.8, 122.1, 121.7, 110.3, 109.2, 99.2, 59.8, 54; HRMS (ESI) calcd for  $\text{C}_{35}\text{H}_{27}\text{ClN}_3\text{O}_2\text{S}^+$   $[\text{M}+\text{H}]^+$  588.1507, found 588.1509.

**(S)-3-(benzo[d]thiazol-2-yl)-4-(4-bromophenyl)-7-(dibenzylamino)-3,4-dihydro-2H-benzo[e][1,3]oxazin-2-one 3e':**

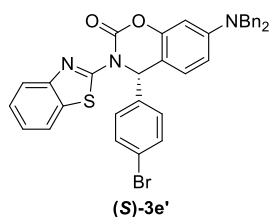

White solid, M.p.: 189 – 190 °C; yield: 91%;  $[\alpha]_{\text{D}}^{20} = -152$  ( $c$  0.1,  $\text{CH}_2\text{Cl}_2$ ); HPLC (Chiralpak ID, *i*-propanol/hexane = 30/70, flow rate 1.0 mL/min,  $\lambda = 254$  nm),  $t_1 = 11.23$  min (minor),  $t_2 = 13.48$  min (major),  $ee = 94\%$ ;  $^1\text{H}$  NMR (400 MHz, DMSO)  $\delta$  7.98 (d,  $J = 7.8$  Hz, 1H), 7.76 (d,  $J = 8.1$  Hz, 1H), 7.51 – 7.21 (m, 17H), 7.11 (s, 1H), 6.59 – 6.56 (m, 1H), 6.48 (d,  $J = 2.1$  Hz, 1H), 4.75 (s, 4H);  $^{13}\text{C}$  NMR (100 MHz, DMSO)  $\delta$  159.4, 149.7, 149.4, 148.7, 148.5, 141.2, 138.8, 133.4, 132.4, 129.1, 128.5, 127.8, 127.4, 127.0, 126.8, 124.8, 122.1, 121.7, 121.5, 110.3, 109.2, 99.2, 59.9, 54.8; HRMS (ESI) calcd for  $\text{C}_{35}\text{H}_{27}\text{BrN}_3\text{O}_2\text{S}^+$   $[\text{M}+\text{H}]^+$  632.1002, found 632.1004.

**(S)-3-(benzo[d]thiazol-2-yl)-4-(3-chlorophenyl)-7-(dibenzylamino)-3,4-dihydro-2H-benzo[e][1,3]oxazin-2-one 3g':**

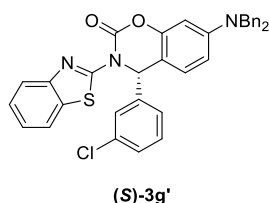

White solid, M.p.: 185 – 186 °C; yield: 94%;  $[\alpha]_{\text{D}}^{20} = -80$  ( $c$  0.1,  $\text{CH}_2\text{Cl}_2$ ); HPLC (Chiralpak IC, *i*-propanol/hexane = 10/90, flow rate 1.0 mL/min,  $\lambda = 254$  nm),  $t_1 = 10.74$  min (major),  $t_2 = 11.53$  min (minor),  $ee = 92\%$ ;  $^1\text{H}$  NMR (400 MHz, DMSO)  $\delta$  7.96 (d,  $J = 7.9$  Hz, 1H), 7.75 (d,  $J = 8.1$  Hz, 1H), 7.49 (s, 1H), 7.40 (t,  $J = 8.8$  Hz, 2H), 7.33 – 7.20 (m, 14H), 7.13 (s, 1H), 6.59 – 6.56 (m, 1H), 6.47 (d,  $J = 2.1$  Hz, 1H), 4.72 (s, 4H);  $^{13}\text{C}$  NMR (100 MHz, DMSO)  $\delta$  159.3, 149.8, 149.4, 148.7, 148.5, 144.2, 138.7, 133.9, 133.4, 131.5, 129.1, 128.4, 127.8, 127.4, 127.0, 126.8, 126.4, 124.8, 124.5, 122.1, 121.7, 110.3, 109.0, 99.2, 59.8, 54.8; HRMS (ESI) calcd for  $\text{C}_{35}\text{H}_{27}\text{ClN}_3\text{O}_2\text{S}^+$   $[\text{M}+\text{H}]^+$  588.1507, found 588.1513.

**(S)-7-(dibenzylamino)-3-(6-fluorobenzo[d]thiazol-2-yl)-4-phenyl-3,4-dihydro-2H-benzo[e][1,3]oxazin-2-one 3m':**



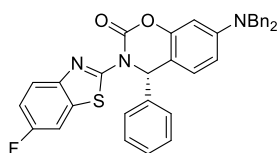

(S)-3m'

White solid, M.p.: 147 – 148 °C; yield: 96%;  $[\alpha]_D^{20} = -90$  (*c* 0.1, CH<sub>2</sub>Cl<sub>2</sub>); HPLC (Chiralpak IC, *i*-propanol/hexane = 30/70, flow rate 1.0 mL/min,  $\lambda = 254$  nm),  $t_1 = 7.80$  min (minor),  $t_2 = 9.11$  min (major), *ee* = 94%; <sup>1</sup>H NMR (400 MHz, DMSO)  $\delta$  7.91 – 7.88 (m, 1H), 7.79 – 7.75 (m, 1H), 7.42 – 7.15 (m, 17H), 7.09 (s, 1H), 6.58 – 6.55 (m, 1H), 6.47 (d, *J* = 2.4 Hz, 1H), 4.74 (s, 4H); <sup>13</sup>C NMR (100 MHz, DMSO)  $\delta$  160.6, 159.5, 159.4 (*J* = 244 Hz), 158.2, 149.7, 149.7, 148.7, 145.3, 141.7, 138.8, 134.8, 134.6, 129.5, 129.1, 128.4, 127.8, 127.4, 127.0, 126.1, 123.0, 122.9, 115.1, 114.9, 110.3, 109.8, 108.7, 108.5, 99.2, 60.4, 54.8; <sup>19</sup>F NMR (376 MHz, DMSO)  $\delta$  -117.11; HRMS (ESI) calcd for C<sub>35</sub>H<sub>27</sub>FN<sub>3</sub>O<sub>2</sub>S<sup>+</sup> [M+H]<sup>+</sup> 572.1803, found 572.1805.

**(S)-3-(6-chlorobenzo[*d*]thiazol-2-yl)-7-(dibenzylamino)-4-phenyl-3,4-dihydro-2H-benzo[*e*][1,3]oxazin-2-one 3n':**

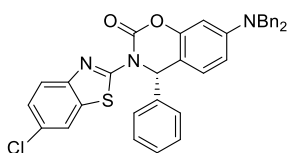

(S)-3n'

White solid, M.p.: 178 – 179 °C; yield: 94%;  $[\alpha]_D^{20} = -126$  (*c* 0.1, CH<sub>2</sub>Cl<sub>2</sub>); HPLC (Chiralpak IC, *i*-propanol/hexane = 30/70, flow rate 1.0 mL/min,  $\lambda = 254$  nm),  $t_1 = 7.96$  min (major),  $t_2 = 8.89$  min (minor), *ee* = 92%; <sup>1</sup>H NMR (400 MHz, DMSO)  $\delta$  8.13 (d, *J* = 2.1 Hz, 1H), 7.75 (d, *J* = 8.7 Hz, 1H), 7.47 – 7.19 (m, 17H), 7.09 (s, 1H), 6.58 – 6.55 (m, 1H), 6.46 (d, *J* = 2.2 Hz, 1H), 4.74 (s, 4H); <sup>13</sup>C NMR (100 MHz, DMSO)  $\delta$  160.3, 149.7, 148.7, 147.4, 141.6, 138.8, 135.1, 129.5, 129.1, 128.9, 128.4, 127.8, 127.4, 127.2, 127.0, 126.1, 123.0, 121.9, 110.3, 109.7, 99.2, 60.4, 54.8; HRMS (ESI) calcd for C<sub>35</sub>H<sub>27</sub>ClN<sub>3</sub>O<sub>2</sub>S<sup>+</sup> [M+H]<sup>+</sup> 588.1507, found 588.1514.

**(R)-3-(6-chlorobenzo[*d*]thiazol-2-yl)-7-(dibenzylamino)-4-phenyl-3,4-dihydro-2H-benzo[*e*][1,3]oxazin-2-one 3n':**

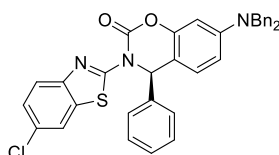

(R)-3n'

White solid, yield: 95%;  $[\alpha]_D^{20} = +151$  (*c* 0.1, CH<sub>2</sub>Cl<sub>2</sub>); HPLC (Chiralpak IC, *i*-propanol/hexane = 30/70, flow rate 1.0 mL/min,  $\lambda = 254$  nm),  $t_1 = 7.93$  min (major),  $t_2 = 8.85$  min (minor), *ee* = 96%.

## 5. Synthesis of L<sub>4</sub>-3.

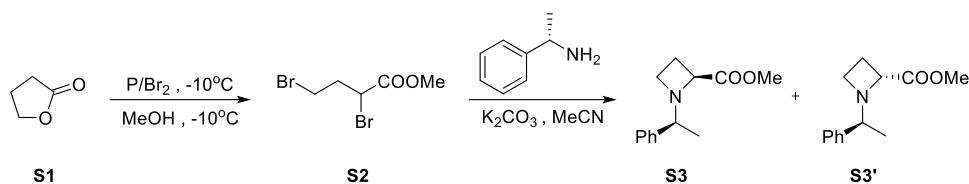

$\gamma$ -Butyrolactone **S1** (5 g, 58.1 mmol) and P (0.5 g, 0.2 mmol) were stirred at  $-20^\circ\text{C}$ .  $\text{Br}_2$  (6.3 mL) was added dropwise for 1 h to the mixture with stirring. After stirring for 3 h at  $80^\circ\text{C}$ , the resulting mixture was cooled to room temperature. The residue was dissolved in MeOH (5 mL) and stirred at  $25^\circ\text{C}$  for 24 h. Adding appropriate amount of EA to the above solution, then aqueous  $\text{Na}_2\text{S}_2\text{O}_3$  was added to the mixture with stirring, until the red of the solution disappears. The resulting mixture was treated with saturated aqueous  $\text{Na}_2\text{CO}_3$  and extracted with EA. The combined organics was dried by  $\text{MgSO}_4$ , filtered and concentrated in vacuo. The residue was purified by chromatography on silica gel (petroleum ether/ethyl acetate 10:1) to afford **S2** (75% yield) as yellow oil.

A mixture of  $\text{K}_2\text{CO}_3$  (1.66 g, 13.2 mmol),  $\text{H}_2\text{O}$  (4.8 mL) MeCN (48 mL), compound **S2** (1.72 g, 6.6 mmol) and (*S*)-1-phenylethylamine (0.73 g, 6.62 mmol) was refluxed for 48 h. The resulting mixture was cooled to  $25^\circ\text{C}$  and extracted three times with EA ( $3 \times 10$  mL). The combined organics was dried by  $\text{MgSO}_4$ , filtered and concentrated in vacuo. The residue was purified by chromatography on silica gel (petroleum ether/ethyl acetate 10:1) to afford **S3** (44% yield) and **S3'** (39% yield) as yellow oil.

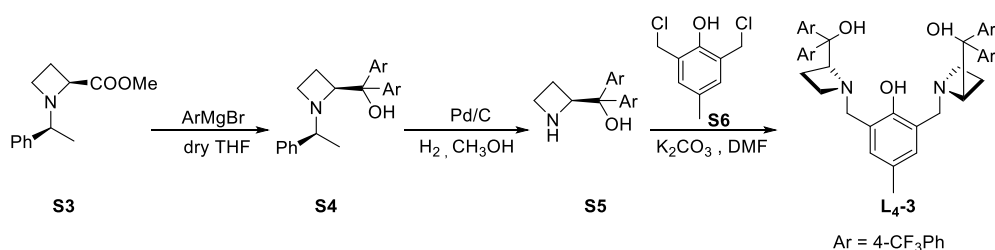

Magnesium strips (0.96 g, 40.13 mmol), dry THF (9 mL) and iodine was stirred at  $25^\circ\text{C}$ , then ArBr (40.13 mmol) and THF (9 mL) was added dropwise for 1 h to the mixture with stirring. The reaction mixture was stirred for 24 h. The resulting mixture was cooled to  $0^\circ\text{C}$ . Compound **S3** and dry THF (4 mL) was added dropwise for 1 h to the mixture with stirring. Then reaction mixture stirred at  $25^\circ\text{C}$  for 48 h. After completion (monitored by TLC), the resulting mixture was treated with saturated aqueous  $\text{NH}_4\text{Cl}$  and extracted with EA. The combined organics was dried by  $\text{MgSO}_4$ , filtered and concentrated in vacuo. The residue was purified by chromatography on silica gel (petroleum ether/ethyl acetate 20:1) to afford **S4** (47% yield) as yellow oil.

A mixture of compound **S4** (1.5 mmol),  $\text{CH}_3\text{OH}$  (25 mL)  $\text{HCOOH}$  (0.31 mL) was stirred for 10 min. Then the resulting mixture was cooled to  $0^\circ\text{C}$  and Pd/C was added, which was subjected to hydrogen (1 atm) and stirred for 48 h. After the completion of the reaction which was indicated by TLC. The resulting mixture was treated with saturated aqueous  $\text{NaHCO}_3$  and extracted with EA. The combined organics was dried

by MgSO<sub>4</sub>, filtered and concentrated in vacuo. The residue was purified by chromatography on silica gel (petroleum ether/ethyl acetate 6:1) to afford **S5** (55% yield) as yellow oil.

A mixture of compound **S5** (1.76 mmol), DMF (2.5 mL) K<sub>2</sub>CO<sub>3</sub> (0.88 g, 6.98 mmol) and 2,6-bis(chloromethyl)-4-methylphenol **S6** (0.26 g, 0.88 mmol) was stirred at 25 °C for 48 h. After the completion of the reaction which was indicated by TLC. The resulting mixture was treated with saturated aqueous NaCl and extracted with EA. The combined organics was dried by MgSO<sub>4</sub>, filtered and concentrated in vacuo. The residue was purified by chromatography on silica gel (petroleum ether/ethyl acetate 6:1) to afford **L4-3** (61% yield) as white solid.

#### methyl 2,4-dibromobutanoate **S2**:

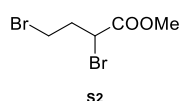

Yellow oil, yield: 75%; <sup>1</sup>H NMR (400 MHz, CDCl<sub>3</sub>) δ 4.66 – 4.18 (m, 1H), 3.94 – 3.67 (m, 3H), 3.56 – 3.47 (m, 2H), 2.74 – 2.10 (m, 2H), <sup>13</sup>C NMR (100 MHz, CDCl<sub>3</sub>) δ 169.5, 53.2, 43.4, 36.9, 29.8.; HRMS (ESI) calcd for C<sub>5</sub>H<sub>8</sub>Br<sub>2</sub>O<sub>2</sub>Na<sup>+</sup> [M+Na]<sup>+</sup> 280.8783, found 280.8787.

#### methyl (*S*)-1-((*S*)-1-phenylethyl)azetidine-2-carboxylate **S3**:

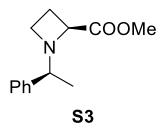

Yellow oil, yield: 44%; [α]<sup>20</sup><sub>D</sub> = -98 (c 0.1, EtOH); <sup>1</sup>H NMR (400 MHz, CDCl<sub>3</sub>) δ 7.54 – 7.14 (m, 5H), 3.87 – 3.60 (m, 4H), 3.4 – 3.42 (m, 1H), 3.20 – 2.98 (m, 1H), 2.91 – 2.65 (m, 1H), 2.40 – 1.98 (m, 2H), 1.22 (d, *J* = 6.6 Hz, 3H), <sup>13</sup>C NMR (100 MHz, CDCl<sub>3</sub>) δ 173.7, 142.5, 128.3, 127.5, 127.2, 67.3, 64.0, 51.9, 49.7, 21.0, 20.8. calcd for C<sub>13</sub>H<sub>18</sub>NO<sub>2</sub><sup>+</sup> [M+H]<sup>+</sup> 220.1332, found 220.1338.

#### methyl (*R*)-1-((*S*)-1-phenylethyl)azetidine-2-carboxylate **S3'**:

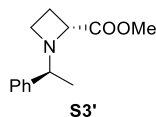

Yellow oil, yield: 39%; [α]<sup>20</sup><sub>D</sub> = +55 (c 0.1, EtOH).

#### (((*R*)-1-((*S*)-1-phenylethyl)azetidin-2-yl)bis(4-(trifluoromethyl)phenyl)methanol **S4**:

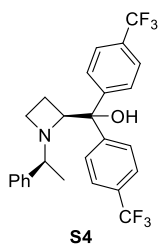

Yellow oil; yield: 47%;  $^1\text{H}$  NMR (400 MHz,  $\text{CDCl}_3$ )  $\delta$  8.05 (d,  $J = 8.3$  Hz, 2H), 7.84 – 7.76 (m, 6H), 7.60 – 7.34 (m, 3H), 7.13 (d,  $J = 7.1$  Hz, 2H), 6.26 (s, 1H), 4.59 (t,  $J = 7.8$  Hz, 1H), 3.53 – 3.48 (m, 1H), 3.29 – 3.18 (m, 2H), 2.02 – 1.98 (m, 2H), 1.03 (d,  $J = 6.9$  Hz, 3H),  $^{13}\text{C}$  NMR (100 MHz,  $\text{CDCl}_3$ )  $\delta$  151.8, 149.0 ( $J = 277$ ), 140.9, 129.9, 129.7 ( $J = 18$ ), 129.5, 129.4, 129.2, 129.0, 128.9, 128.7, 128.6, 128.6, 128.5, 128.0, 127.6, 126.5, 126.2, 125.9, 125.9, 125.5, 125.4, 125.34, 125.4, 123.2, 123.2, 120.5, 69.7, 62.0, 45.6, 27.1, 19.8, 19.5,  $^{19}\text{F}$  NMR (376 MHz,  $\text{CDCl}_3$ )  $\delta$  -62.13, -62.22; HRMS (ESI) calcd for  $\text{C}_{26}\text{H}_{24}\text{F}_6\text{NO}^+$   $[\text{M}+\text{H}]^+$  480.1757, found 480.1764.

**(S)-azetidin-2-ylbis(4-(trifluoromethyl)phenyl)methanol S5:**

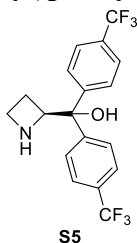

Yellow oil; yield: 55%;  $^1\text{H}$  NMR (400 MHz, DMSO)  $\delta$  7.91 – 7.47 (m, 8H), 4.95 (t,  $J = 7.6$  Hz, 1H), 3.49 (s, 1H), 3.11 – 2.98 (m, 1H), 2.22 – 1.74 (m, 2H);  $^{13}\text{C}$  NMR (100 MHz, DMSO)  $\delta$  150.9, 149.0, 128.1, 128.0, 127.8 ( $J = 19$  Hz), 127.7, 127.7, 127.6, 127.4, 127.4, 127.1, 126.1, 126.0, 125.6, 125.4 ( $J = 248$  Hz), 125.3, 125.3, 125.3, 123.4, 123.3, 77.4, 63.4, 42.0, 21.4; HRMS (ESI) calcd for  $\text{C}_{18}\text{H}_{16}\text{F}_6\text{NO}^+$   $[\text{M}+\text{H}]^+$  376.1131, found 376.1137.

**(S,S)-L4-3:**

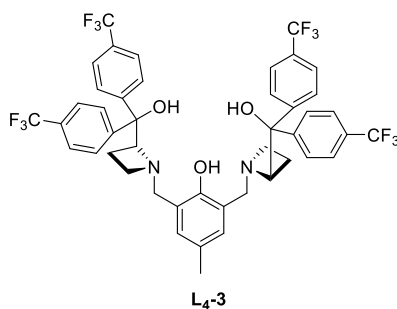

White solid, M.p.: 96 – 97 °C; yield: 61%;  $^1\text{H}$  NMR (400 MHz,  $\text{CDCl}_3$ )  $\delta$  7.84 – 7.39 (m, 16H), 6.49 (s, 2H), 4.45 (t,  $J = 7.9$  Hz, 2H), 3.40 – 3.23 (m, 4H), 3.16 (d,  $J = 13.5$  Hz, 2H), 2.98 – 2.91 (m, 1H), 2.25 – 1.82 (m, 7H);  $^{13}\text{C}$  NMR (100 MHz,  $\text{CDCl}_3$ )  $\delta$  152.2, 149.4 ( $J = 276$  Hz), 147.3, 129.6, 129.5 ( $J = 15$  Hz), 129.3, 129.2, 128.7, 128.0, 126.2, 126.1, 125.5, 125.4, 125.4, 125.3, 125.2, 122.7, 122.7, 121.9, 72.5, 58.3, 50.4,

20.3, 19.2;  $^{19}\text{F}$  NMR (376 MHz,  $\text{CDCl}_3$ )  $\delta$  -62.51, -62.56.; HRMS (ESI) calcd for  $\text{C}_{45}\text{H}_{39}\text{F}_{12}\text{N}_2\text{O}_3^+$   $[\text{M}+\text{H}]^+$  883.2764, found 883.2772.

## 6. Control experiments

**Table S4.** Screening of **L5-4** loading.

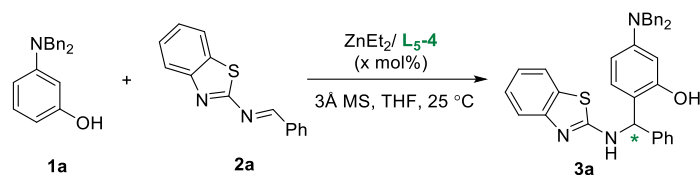

| Entry <sup>a</sup> | 1a        | 2a         | 3Å MS | Time (h) | Yield (%) <sup>b</sup> | ee (%) <sup>c</sup> |
|--------------------|-----------|------------|-------|----------|------------------------|---------------------|
| x = 20             | 0.05 mmol | 0.075 mmol | 20 mg | 24       | 92                     | 92 (R)              |
| x = 10             | 0.1 mmol  | 0.15 mmol  | 40 mg | 24       | 66                     | 92 (R)              |
| x = 5              | 0.2 mmol  | 0.30 mmol  | 80 mg | 24       | 52                     | 63 (R)              |
| x = 0              | 0.1 mmol  | 0.15 mmol  | -     | 24       | 31                     | -                   |

<sup>a</sup>Reaction conditions: **1a** (1 eq.), **2a** (1.5 eq.), ligand/ $\text{ZnEt}_2$  (x mol%) in a specified solvent (2 mL) under  $\text{N}_2$  at 25 °C for 24 h. <sup>b</sup>Isolated yields. <sup>c</sup>Determined by chiral HPLC analysis.

**Table S5.** Screening of **L4-3** loading.

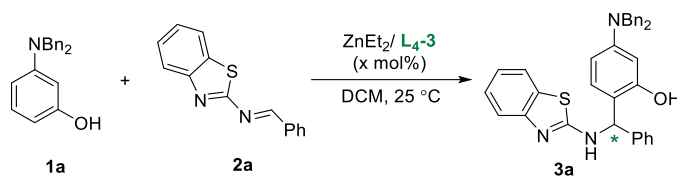

| Entry <sup>a</sup> | 1a        | 2a         | Time (h) | Yield (%) <sup>b</sup> | ee (%) <sup>c</sup> |
|--------------------|-----------|------------|----------|------------------------|---------------------|
| x = 20             | 0.05 mmol | 0.075 mmol | 24       | 95                     | 96 (S)              |
| x = 10             | 0.1 mmol  | 0.15 mmol  | 24       | 80                     | 92 (S)              |
| x = 5              | 0.2 mmol  | 0.30 mmol  | 24       | 75                     | 71 (S)              |
| x = 0              | 0.1 mmol  | 0.15 mmol  | 24       | 64                     | -                   |

<sup>a</sup>Reaction conditions: **1a** (1 eq.), **2a** (1.5 eq.), ligand/ $\text{ZnEt}_2$  (x mol%) in a specified solvent (2 mL) under  $\text{N}_2$  at 25 °C for 24 h. <sup>b</sup>Isolated yields. <sup>c</sup>Determined by chiral HPLC analysis.

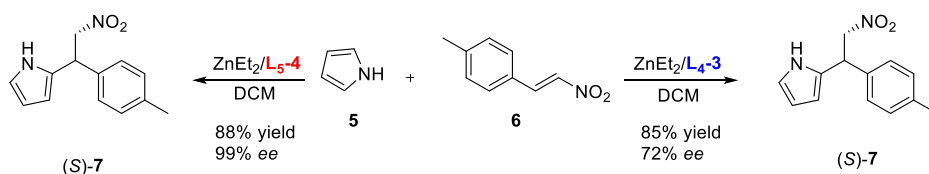

In a flame-dried Schlenk tube, a solution of diethylzinc (0.04 mL, 1.0 mol L<sup>-1</sup> in hexane, 0.02 mmol) was added to a solution of the chiral ligand **L5-4**/**L4-3** (0.02 mmol) in dry DCM (2.0 mL) under nitrogen at 25 °C. The mixture was stirred at 25 °C for 30 min. Then, 1*H*-pyrrole **5** and 1-methyl-4-(2-nitrovinyl)benzene **6** were added under an argon atmosphere. The solution was stirred at 25 °C for 24 h, and then quenched with aqueous  $\text{NH}_4\text{Cl}$  (5 mL), and extracted three times with EA (3 × 10 mL). The combined organics was washed with brine before being dried by  $\text{MgSO}_4$ , filtered and concentrated in vacuo. The reaction mixture was purified through preparative thin layer

chromatography on silica gel (petroleum ether/ethyl acetate = 5:1) to afford the product (S)-7.

**(S)-2-(2-nitro-1-(*p*-tolyl)ethyl)-1*H*-pyrrole 7:**

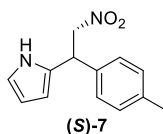

Yellow oil, yield: 85%;  $[\alpha]_D^{20} = -54$  (*c* 0.1, CHCl<sub>3</sub>); HPLC (Chiralpak OD-H, *i*-propanol/hexane = 20/80, flow rate 1.0 mL/min,  $\lambda = 254$  nm),  $t_1 = 12.77$  min (minor),  $t_2 = 14.67$  min (major), *ee* = 70%; <sup>1</sup>H NMR (400 M, DMSO)  $\delta$  10.63 (s, 1H), 7.17 – 7.05 (m, 4H), 6.62 – 6.60 (m, 1H), 5.94 – 5.92 (m, 2H), 5.05 (t, *J* = 7.7 Hz, 2H), 4.72 (t, *J* = 8.3 Hz, 1H), 2.21 (s, 3H).; <sup>13</sup>C NMR (100 MHz, DMSO)  $\delta$  137.0, 136.9, 130.0, 129.6, 127.9, 118.1, 108.0, 105.3, 79.0, 42.6, 20.9.; HRMS (ESI) calcd for C<sub>12</sub>H<sub>13</sub>N<sub>2</sub>O<sub>2</sub><sup>+</sup> [M+H]<sup>+</sup> 217.0972, found 217.0975.

**(S)-2-(2-nitro-1-(*p*-tolyl)ethyl)-1*H*-pyrrole 7:**

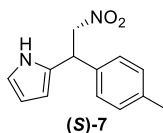

Yellow oil, yield: 88%;  $[\alpha]_D^{20} = -60$  (*c* 0.1, CHCl<sub>3</sub>); HPLC (Chiralpak OD-H, *i*-propanol/hexane = 20/80, flow rate 1.0 mL/min,  $\lambda = 254$  nm),  $t_1 = 12.46$  min (minor),  $t_2 = 14.69$  min (major), *ee* = 99%.

## 7. X-ray single crystal data for compound (S)-3n' and (R)-3n'

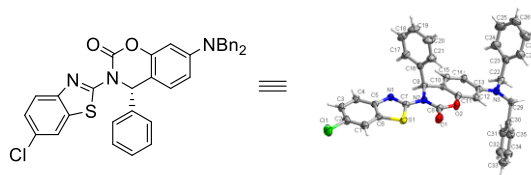

CCDC: 2287151 for (S)-3n'

**Table S6 Crystal data and structure refinement for (S)-3n'**

|                                             |                                                                   |
|---------------------------------------------|-------------------------------------------------------------------|
| Identification code                         | 202304101_auto                                                    |
| Empirical formula                           | C <sub>35</sub> H <sub>26</sub> ClN <sub>3</sub> O <sub>2</sub> S |
| Formula weight                              | 588.10                                                            |
| Temperature/K                               | 293(2)                                                            |
| Crystal system                              | orthorhombic                                                      |
| Space group                                 | P2 <sub>1</sub> 2 <sub>1</sub> 2 <sub>1</sub>                     |
| a/Å                                         | 6.4206(2)                                                         |
| b/Å                                         | 17.8290(5)                                                        |
| c/Å                                         | 29.7449(8)                                                        |
| α/°                                         | 90                                                                |
| β/°                                         | 90                                                                |
| γ/°                                         | 90                                                                |
| Volume/Å <sup>3</sup>                       | 3405.00(17)                                                       |
| Z                                           | 4                                                                 |
| ρ <sub>calc</sub> /cm <sup>3</sup>          | 1.147                                                             |
| μ/mm <sup>-1</sup>                          | 1.821                                                             |
| F(000)                                      | 1224.0                                                            |
| Crystal size/mm <sup>3</sup>                | 0.16 × 0.11 × 0.1                                                 |
| Radiation                                   | CuKα (λ = 1.54184)                                                |
| 2θ range for data collection/°              | 10.208 to 140.68                                                  |
| Index ranges                                | -7 ≤ h ≤ 6, -20 ≤ k ≤ 21, -27 ≤ l ≤ 36                            |
| Reflections collected                       | 12228                                                             |
| Independent reflections                     | 6339 [R <sub>int</sub> = 0.0319, R <sub>sigma</sub> = 0.0487]     |
| Data/restraints/parameters                  | 6339/0/379                                                        |
| Goodness-of-fit on F <sup>2</sup>           | 1.002                                                             |
| Final R indexes [I ≥ 2σ (I)]                | R <sub>1</sub> = 0.0447, wR <sub>2</sub> = 0.1108                 |
| Final R indexes [all data]                  | R <sub>1</sub> = 0.0542, wR <sub>2</sub> = 0.1175                 |
| Largest diff. peak/hole / e Å <sup>-3</sup> | 0.15/-0.17                                                        |
| Flack parameter                             | 0.004(13)                                                         |



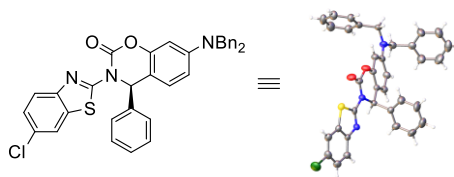

CCDC: 2287152 for (R)-3n'

**Table S7 Crystal data and structure refinement for (R)-3n'**

|                                             |                                                                   |
|---------------------------------------------|-------------------------------------------------------------------|
| Identification code                         | 230508_WQANGZ_047965_0m_a                                         |
| Empirical formula                           | C <sub>35</sub> H <sub>26</sub> ClN <sub>3</sub> O <sub>2</sub> S |
| Formula weight                              | 588.10                                                            |
| Temperature/K                               | 193.0                                                             |
| Crystal system                              | orthorhombic                                                      |
| Space group                                 | P2 <sub>1</sub> 2 <sub>1</sub> 2 <sub>1</sub>                     |
| a/Å                                         | 6.3743(3)                                                         |
| b/Å                                         | 17.8083(8)                                                        |
| c/Å                                         | 29.5159(14)                                                       |
| α/°                                         | 90                                                                |
| β/°                                         | 90                                                                |
| γ/°                                         | 90                                                                |
| Volume/Å <sup>3</sup>                       | 3350.5(3)                                                         |
| Z                                           | 4                                                                 |
| ρ <sub>calc</sub> /cm <sup>3</sup>          | 1.166                                                             |
| μ/mm <sup>-1</sup>                          | 0.209                                                             |
| F(000)                                      | 1224.0                                                            |
| Crystal size/mm <sup>3</sup>                | ? × ? × ?                                                         |
| Radiation                                   | MoKα (λ = 0.71073)                                                |
| 2θ range for data collection/°              | 3.584 to 52.76                                                    |
| Index ranges                                | -7 ≤ h ≤ 7, -21 ≤ k ≤ 22, -35 ≤ l ≤ 36                            |
| Reflections collected                       | 28414                                                             |
| Independent reflections                     | 6840 [R <sub>int</sub> = 0.0597, R <sub>sigma</sub> = 0.0591]     |
| Data/restraints/parameters                  | 6840/0/379                                                        |
| Goodness-of-fit on F <sup>2</sup>           | 0.976                                                             |
| Final R indexes [I ≥ 2σ (I)]                | R <sub>1</sub> = 0.0448, wR <sub>2</sub> = 0.0992                 |
| Final R indexes [all data]                  | R <sub>1</sub> = 0.0702, wR <sub>2</sub> = 0.1115                 |
| Largest diff. peak/hole / e Å <sup>-3</sup> | 0.15/-0.21                                                        |
| Flack parameter                             | 0.05(3)                                                           |

## 8. Density functional theory studies

### 1) Computational method

All calculations were performed using Gaussian16 software.<sup>1</sup> Here, we used the B3LYP density functional<sup>4-6</sup> with Grimme's empirical dispersion correction and BJ-damping (D3(BJ)).<sup>7-10</sup> All geometric configurations were used 6-31+G (d,p) basis sets<sup>11-14</sup> for C, H, N, O, S, Cl atoms and the LAN2DZ basis sets<sup>15</sup> for Zn. Frequency calculations at the same level with the optimization were performed to determine whether the calculated structure was intermediate (no virtual frequency) or transition state (only one virtual frequency). Higher level single point energy calculations were performed using 6-311++G(d,p) basis sets<sup>16-23</sup> and the scalar-relativistic Stuttgart–Dresden (SDD) pseudopotential<sup>24</sup> on the optimized structures at M062X<sup>25</sup>. The solvent effect of geometric optimization and single point energy calculation was described by the SMD model (solvent=toluene)<sup>26</sup>.

All geometries were prepared using CYLView software,<sup>27</sup> VMD programs<sup>28</sup>, and Pymol.<sup>29</sup> Analyses of independent gradient model (IGM),<sup>30-32</sup> were performed with the aid of Multiwfn 3.8<sup>32</sup> and VMD programs.

### 2) Energetics and Cartesian Coordinates for All Calculated Species

| Species                 | Electronic Energy (EE) | High-Level Single Point Energies | $\Delta\Delta E$ | $\Delta\Delta H$ | $\Delta\Delta G$ | Imaginary Frequency (cm <sup>-1</sup> *i) |
|-------------------------|------------------------|----------------------------------|------------------|------------------|------------------|-------------------------------------------|
| <b>L4</b>               | -3722.082489           | -3721.646002                     | 0.718584         | 0.719528         | 0.592677         |                                           |
| <b>ZnEt<sub>2</sub></b> | -224.034461            | -385.594982                      | 0.136113         | 0.137057         | 0.095732         |                                           |
| <b>EtH</b>              | -79.842619             | -79.799162                       | 0.078442         | 0.079386         | 0.051856         |                                           |
| <b>Zn-L4</b>            | -3930.824884           | -4253.573924                     | 0.756026         | 0.756971         | 0.622092         |                                           |
| <b>1</b>                | -520.126353            | -519.991276                      | 0.2478           | 0.248744         | 0.19687          |                                           |
| <b>4C</b>               | -4371.135194           | -4693.786959                     | 0.925497         | 0.926441         | 0.771175         |                                           |
| <b>4</b>                | -4371.188347           | -4693.819647                     | 0.926118         | 0.927063         | 0.773441         |                                           |
| <b>2</b>                | -1047.270325           | -1047.115165                     | 0.218677         | 0.219621         | 0.162727         |                                           |
| <b>5a</b>               | -5418.529519           | -5740.979438                     | 1.149194         | 1.150139         | 0.964031         |                                           |
| <b>TS-6a</b>            | -5418.500504           | -5740.952626                     | 1.149377         | 1.150321         | 0.968755         | -422.33                                   |
| <b>5b</b>               | -5418.505222           | -5740.961257                     | 1.149292         | 1.150236         | 0.96265          |                                           |
| <b>TS-6b</b>            | -5418.487966           | -5740.94555                      | 1.148475         | 1.149419         | 0.964214         | -394.13                                   |
| <b>5c</b>               | -5418.512124           | -5740.959813                     | 1.148951         | 1.149895         | 0.964906         |                                           |
| <b>TS-6c</b>            | -5418.495059           | -5740.943913                     | 1.148227         | 1.149171         | 0.967351         | -398.69                                   |
| <b>5d</b>               | -5418.520905           | -5740.967589                     | 1.148861         | 1.149805         | 0.965917         |                                           |
| <b>TS-6d</b>            | -5418.498808           | -5740.944848                     | 1.148103         | 1.149047         | 0.96921          | -446.86                                   |
| <b>7</b>                | -5418.505317           | -5740.963261                     | 1.151299         | 1.152243         | 0.969866         |                                           |
| <b>8</b>                | -5418.50187            | -5740.964019                     | 1.149804         | 1.150748         | 0.967988         |                                           |
| <b>3-S</b>              | -1567.427649           | -1567.138932                     | 0.471603         | 0.472547         | 0.384158         |                                           |

|               |                    |              |          |          |          |         |
|---------------|--------------------|--------------|----------|----------|----------|---------|
| <b>L5</b>     | -3800.782463       | -3800.309518 | 0.78134  | 0.782284 | 0.657523 |         |
| <b>Zn-L5</b>  | -4009.481014       | -4332.203016 | 0.818293 | 0.819237 | 0.677446 |         |
| <b>4C'</b>    | -4449.824204       | -4772.43282  | 0.988947 | 0.989891 | 0.83143  |         |
| <b>4'</b>     | <b>-4449.86746</b> | -4772.46945  | 0.988847 | 0.989792 | 0.830615 |         |
| <b>5a'</b>    | -5497.186204       | -5819.602276 | 1.211521 | 1.212465 | 1.020286 |         |
| <b>TS-6a'</b> | -5497.165998       | -5819.586326 | 1.210239 | 1.211183 | 1.024428 | -451.17 |
| <b>5b'</b>    | -5497.193207       | -5819.610983 | 1.2108   | 1.211744 | 1.018737 |         |
| <b>TS-6b'</b> | -5497.170269       | -5819.593838 | 1.210532 | 1.211476 | 1.022881 | -313.09 |
| <b>5c'</b>    | -5497.195559       | -5819.612803 | 1.211423 | 1.212367 | 1.023329 |         |
| <b>TS-6c'</b> | -5497.170876       | -5819.589066 | 1.210552 | 1.211496 | 1.0229   | -370.40 |
| <b>5d'</b>    | -5497.186109       | -5819.604742 | 1.211607 | 1.212551 | 1.022532 |         |
| <b>TS-6d'</b> | -5497.168612       | -5819.587637 | 1.210923 | 1.211867 | 1.026717 | -428.77 |
| <b>7'</b>     | -5497.176717       | -5819.605108 | 1.21222  | 1.213164 | 1.026906 |         |
| <b>8'</b>     | -5497.174088       | -5819.603536 | 1.212787 | 1.213731 | 1.025855 |         |
| <b>3-R</b>    | -1567.427618       | -1567.138871 | 0.471601 | 0.472545 | 0.384069 |         |

#### L4

|   |             |            |             |
|---|-------------|------------|-------------|
| C | 0.52937900  | 6.07496300 | -0.19037900 |
| C | 1.64628200  | 5.33258200 | -0.58160500 |
| C | 1.57196700  | 3.94940400 | -0.73433500 |
| C | 0.35239200  | 3.30068300 | -0.47209100 |
| C | -0.77588300 | 4.02972400 | -0.05373200 |
| C | -0.67230000 | 5.41792400 | 0.06806400  |
| H | 2.59092000  | 5.83237700 | -0.78068200 |
| H | -1.54655900 | 5.98404600 | 0.38003400  |
| O | 0.30819100  | 1.95048800 | -0.63253500 |
| C | 2.75337800  | 3.09585600 | -1.12072400 |
| H | 3.58127000  | 3.72813900 | -1.48710300 |
| H | 2.45966900  | 2.41861100 | -1.92731600 |
| C | -2.04690600 | 3.28924500 | 0.29130600  |
| H | -1.93122700 | 2.76809000 | 1.24805600  |
| H | -2.88710500 | 3.99611900 | 0.39932800  |
| C | 3.94300500  | 1.03935000 | -0.11542800 |
| C | 4.06082200  | 2.81175400 | 1.04200500  |
| C | 4.63028400  | 1.38563100 | 1.22835700  |
| H | 4.66037400  | 1.03232700 | -0.94808400 |
| H | 4.80504200  | 3.51523200 | 0.63331600  |
| H | 3.56055900  | 3.28462000 | 1.89368700  |
| H | 5.71466500  | 1.28103800 | 1.26202100  |
| H | 4.17746700  | 0.85214700 | 2.06407500  |
| C | -3.44538200 | 1.32225900 | -0.54459000 |
| C | -2.85813600 | 2.71654200 | -2.03242000 |
| C | -3.80201800 | 1.49345500 | -2.04331200 |
| H | -4.22647200 | 1.72853100 | 0.11209700  |

|   |             |             |             |
|---|-------------|-------------|-------------|
| H | -3.39950600 | 3.67027600  | -1.96242600 |
| H | -2.10451000 | 2.79101900  | -2.82114100 |
| H | -4.85064700 | 1.68000600  | -2.27493700 |
| H | -3.44442700 | 0.67898600  | -2.67787700 |
| N | -2.32836300 | 2.27256600  | -0.72229400 |
| N | 3.15850400  | 2.27761100  | 0.01135300  |
| C | -3.00542800 | -0.06882400 | -0.02995500 |
| C | 3.04727500  | -0.22925500 | -0.13155600 |
| O | -1.92566200 | -0.55220300 | -0.82909600 |
| O | 2.03666600  | -0.03426100 | 0.84580300  |
| H | 0.59680400  | 7.15289500  | -0.08537400 |
| C | -4.14916100 | -1.08315800 | -0.05337800 |
| C | -3.82193900 | -2.44171600 | 0.05900200  |
| C | -5.49671100 | -0.72744700 | -0.16251100 |
| C | -4.80762800 | -3.42245000 | 0.06068600  |
| H | -2.77793700 | -2.72288000 | 0.14354600  |
| C | -6.49957900 | -1.69924700 | -0.16160700 |
| H | -5.78945100 | 0.31213400  | -0.25339600 |
| C | -6.14541500 | -3.04005200 | -0.05013900 |
| H | -4.54834800 | -4.47129400 | 0.14886600  |
| H | -7.54262800 | -1.41784900 | -0.24974800 |
| C | -2.44837600 | 0.09365400  | 1.38307000  |
| C | -3.30735000 | 0.38672200  | 2.44868100  |
| C | -1.07376100 | 0.02290100  | 1.62023900  |
| C | -2.80494500 | 0.62694400  | 3.72522000  |
| H | -4.38082000 | 0.41927000  | 2.28835900  |
| C | -0.55517500 | 0.25856500  | 2.89334800  |
| H | -0.39122800 | -0.20193300 | 0.81530000  |
| C | -1.42645900 | 0.56549200  | 3.93440400  |
| H | -3.47039000 | 0.85384400  | 4.55021600  |
| H | 0.51502400  | 0.20617700  | 3.05633700  |
| C | 3.88805400  | -1.43227600 | 0.27976500  |
| C | 3.72459900  | -2.02141100 | 1.53632100  |
| C | 4.86867300  | -1.93904100 | -0.58102300 |
| C | 4.52375900  | -3.09390200 | 1.93266900  |
| H | 2.96039800  | -1.63711300 | 2.19981600  |
| C | 5.67985900  | -3.00411800 | -0.19765000 |
| H | 4.99340100  | -1.51235800 | -1.57094700 |
| C | 5.49860000  | -3.57329400 | 1.06193700  |
| H | 4.39206700  | -3.55262000 | 2.90615700  |
| H | 6.43776700  | -3.39461700 | -0.86708300 |
| C | 2.38479700  | -0.49458900 | -1.49293600 |
| C | 2.91455500  | -0.07288400 | -2.71580700 |
| C | 1.19196100  | -1.22760200 | -1.50577400 |

|    |             |             |             |
|----|-------------|-------------|-------------|
| C  | 2.26210300  | -0.34490900 | -3.92128000 |
| H  | 3.84089700  | 0.48920400  | -2.75241500 |
| C  | 0.53169400  | -1.51461300 | -2.69480900 |
| H  | 0.77029400  | -1.56207600 | -0.56697900 |
| C  | 1.06988000  | -1.06018500 | -3.89791900 |
| H  | 2.67336200  | -0.00053700 | -4.86327300 |
| H  | -0.38827600 | -2.08834200 | -2.68917000 |
| Cl | -0.78605100 | 0.87420000  | 5.54114900  |
| Cl | -7.39803400 | -4.26859900 | -0.05022800 |
| Cl | 6.51314200  | -4.92284600 | 1.55344000  |
| Cl | 0.22335500  | -1.39316500 | -5.40426000 |
| H  | 1.71625200  | 0.87482200  | 0.67097500  |
| H  | -0.64998100 | 1.69907700  | -0.73133600 |
| H  | -2.25685100 | -0.70990100 | -1.72210800 |

**ZnEt<sub>2</sub>**

|    |             |             |             |
|----|-------------|-------------|-------------|
| Zn | 0.00002000  | 0.00028400  | 0.00017700  |
| C  | 1.91708100  | -0.69561900 | -0.00001100 |
| H  | 2.04968500  | -1.34486900 | 0.87526000  |
| H  | 2.04941700  | -1.34503000 | -0.87520500 |
| C  | 2.98657800  | 0.41026100  | -0.00027300 |
| H  | 2.90577400  | 1.05829900  | 0.88049700  |
| H  | 4.00599900  | 0.00072800  | -0.00038700 |
| H  | 2.90551500  | 1.05814100  | -0.88113500 |
| C  | -1.91733800 | 0.69537100  | -0.00001500 |
| H  | -2.04996900 | 1.34476300  | -0.87517600 |
| H  | -2.05016100 | 1.34453600  | 0.87528700  |
| C  | -2.98639900 | -0.41093600 | -0.00027300 |
| H  | -2.90529900 | -1.05898200 | 0.88046400  |
| H  | -4.00598800 | -0.00181900 | -0.00032500 |
| H  | -2.90511100 | -1.05874500 | -0.88116600 |

**EtH**

|   |             |             |             |
|---|-------------|-------------|-------------|
| C | 0.76487100  | 0.00000000  | 0.00000000  |
| H | 1.16407000  | 0.82905300  | -0.59374700 |
| H | 1.16406300  | -0.92872900 | -0.42110700 |
| H | 1.16406800  | 0.09967300  | 1.01485500  |
| C | -0.76487100 | 0.00000000  | 0.00000000  |
| H | -1.16406800 | -0.09943400 | -1.01487800 |
| H | -1.16407000 | -0.82919200 | 0.59355200  |
| H | -1.16406300 | 0.92863000  | 0.42132600  |

**Zn-L<sub>4</sub>**

|   |             |             |             |
|---|-------------|-------------|-------------|
| C | -0.35073200 | -5.58436800 | -1.50188600 |
|---|-------------|-------------|-------------|

|    |             |             |             |
|----|-------------|-------------|-------------|
| C  | -1.51428000 | -4.83076300 | -1.66435900 |
| C  | -1.51932900 | -3.45971200 | -1.40898600 |
| C  | -0.33296900 | -2.83323300 | -0.97660200 |
| C  | 0.84040500  | -3.58863600 | -0.78169600 |
| C  | 0.81486900  | -4.95808000 | -1.06252000 |
| H  | -2.43191400 | -5.30992700 | -1.99596700 |
| H  | 1.71898200  | -5.54193100 | -0.90969300 |
| O  | -0.39107600 | -1.50631000 | -0.69931400 |
| C  | -2.74108500 | -2.59883800 | -1.59878200 |
| H  | -3.54799500 | -3.17936200 | -2.06914200 |
| H  | -2.48041600 | -1.78092300 | -2.27349700 |
| C  | 2.06139700  | -2.93927700 | -0.18342300 |
| H  | 1.80746800  | -2.52245900 | 0.79599500  |
| H  | 2.85295100  | -3.68746400 | -0.03131500 |
| C  | -4.00925000 | -0.70239800 | -0.45339300 |
| C  | -4.35361700 | -2.61712400 | 0.38369300  |
| C  | -4.92651800 | -1.21404000 | 0.67715300  |
| H  | -4.55479200 | -0.64187500 | -1.40356300 |
| H  | -4.99351900 | -3.20342800 | -0.29007100 |
| H  | -4.04527100 | -3.24408200 | 1.22392800  |
| H  | -5.99865900 | -1.07190500 | 0.54513600  |
| H  | -4.61276400 | -0.82031800 | 1.64523100  |
| C  | 3.73841100  | -1.01692900 | -0.49104200 |
| C  | 3.34154800  | -2.15797600 | -2.24091200 |
| C  | 4.33733100  | -1.02538000 | -1.91221800 |
| H  | 4.33893300  | -1.59397500 | 0.21945000  |
| H  | 3.78629000  | -3.15793500 | -2.16870600 |
| H  | 2.76176200  | -2.09267800 | -3.16591300 |
| H  | 5.39789900  | -1.26015600 | -1.99557500 |
| H  | 4.11494400  | -0.09557800 | -2.43685000 |
| N  | 2.57492800  | -1.82551700 | -1.00282700 |
| N  | -3.22789200 | -1.97563700 | -0.35307000 |
| C  | 3.30843400  | 0.37099100  | 0.08231500  |
| C  | -3.18212700 | 0.58935000  | -0.16665100 |
| O  | 2.44575600  | 0.98002900  | -0.83110000 |
| O  | -2.40988200 | 0.41908500  | 0.96353300  |
| Zn | 1.03547200  | -0.28372600 | -1.11472100 |
| Zn | -1.60661800 | -1.36397500 | 1.13483900  |
| C  | -0.88864000 | -2.69998600 | 2.50735500  |
| H  | -0.35496000 | -6.65006700 | -1.70501900 |
| C  | 4.57944200  | 1.21273900  | 0.24432600  |
| C  | 4.78953300  | 2.29911400  | -0.60885600 |
| C  | 5.56237300  | 0.90152300  | 1.19099900  |
| C  | 5.95445400  | 3.06131800  | -0.52762200 |

|    |             |             |             |
|----|-------------|-------------|-------------|
| H  | 4.02000700  | 2.53871200  | -1.33176100 |
| C  | 6.73340700  | 1.65072200  | 1.28472800  |
| H  | 5.41783600  | 0.07783900  | 1.88146100  |
| C  | 6.91954400  | 2.72699600  | 0.41890300  |
| H  | 6.11254600  | 3.90558400  | -1.18929500 |
| H  | 7.49020900  | 1.40881400  | 2.02220000  |
| C  | 2.57300700  | 0.18790900  | 1.43229900  |
| C  | 2.92196900  | -0.76011200 | 2.40463900  |
| C  | 1.45993700  | 1.00198900  | 1.68402600  |
| C  | 2.18316900  | -0.89794600 | 3.57940400  |
| H  | 3.76797300  | -1.42216700 | 2.25528500  |
| C  | 0.69624000  | 0.86680300  | 2.84268400  |
| H  | 1.20514000  | 1.75765500  | 0.95173300  |
| C  | 1.07051400  | -0.08444800 | 3.78816100  |
| H  | 2.45475400  | -1.64232500 | 4.31888000  |
| H  | -0.17854100 | 1.48612000  | 3.00302200  |
| C  | -4.20917800 | 1.71985500  | 0.04355200  |
| C  | -4.36001600 | 2.25893600  | 1.32307000  |
| C  | -5.02664700 | 2.19626100  | -0.98793700 |
| C  | -5.30699800 | 3.25042100  | 1.57778600  |
| H  | -3.71366700 | 1.88368300  | 2.10718400  |
| C  | -5.98021300 | 3.18508900  | -0.75225700 |
| H  | -4.91848800 | 1.81014300  | -1.99650700 |
| C  | -6.11173200 | 3.70303900  | 0.53501100  |
| H  | -5.42099100 | 3.66865700  | 2.57176000  |
| H  | -6.60978000 | 3.55441500  | -1.55390900 |
| C  | -2.27362500 | 0.95015500  | -1.36718300 |
| C  | -2.54995300 | 0.66370600  | -2.70790600 |
| C  | -1.06278800 | 1.59425000  | -1.07671000 |
| C  | -1.62587400 | 0.93113800  | -3.72306700 |
| H  | -3.48619600 | 0.19481300  | -2.98899400 |
| C  | -0.12843500 | 1.89544000  | -2.07535800 |
| H  | -0.86478800 | 1.83339700  | -0.03818200 |
| C  | -0.41190700 | 1.52819200  | -3.39886500 |
| H  | -1.84561800 | 0.67172000  | -4.75264800 |
| H  | 0.80173700  | 2.39788800  | -1.83179300 |
| Cl | 0.13222400  | -0.26373300 | 5.25604000  |
| Cl | 8.39380300  | 3.67827500  | 0.52929200  |
| Cl | -7.31104800 | 4.95330300  | 0.84294800  |
| Cl | 0.77263800  | 1.84136600  | -4.65677400 |
| H  | 0.20787300  | -2.64955600 | 2.47774700  |
| H  | -1.16285600 | -2.37007500 | 3.51619800  |
| C  | -1.33586300 | -4.15535300 | 2.29694200  |
| H  | -0.88396200 | -4.84645400 | 3.02434500  |

|           |             |             |             |
|-----------|-------------|-------------|-------------|
| H         | -2.42262900 | -4.26559300 | 2.40302200  |
| H         | -1.07750600 | -4.52716400 | 1.30012400  |
| <b>1</b>  |             |             |             |
| C         | 0.40189000  | -1.54682000 | -0.36162500 |
| C         | -0.00076600 | -0.22628700 | -0.05816800 |
| C         | 1.01262000  | 0.72442000  | 0.19684700  |
| C         | 2.35974600  | 0.36415300  | 0.15425700  |
| C         | 2.75193600  | -0.94166200 | -0.14893000 |
| C         | 1.75384900  | -1.87710500 | -0.40463900 |
| H         | -0.33234200 | -2.31947700 | -0.54552600 |
| H         | 0.76043700  | 1.75754700  | 0.40919100  |
| H         | 3.80513900  | -1.19389600 | -0.17765600 |
| H         | 2.03301700  | -2.90102900 | -0.63711600 |
| O         | 3.35051500  | 1.27655900  | 0.39759400  |
| H         | 2.94552200  | 2.12947200  | 0.60002600  |
| N         | -1.34023500 | 0.12879600  | -0.01234500 |
| C         | -1.76754500 | 1.44409600  | 0.43795200  |
| H         | -2.76752500 | 1.33913900  | 0.87316400  |
| H         | -1.12089900 | 1.77577900  | 1.25736900  |
| C         | -2.38797200 | -0.80539700 | -0.39723000 |
| H         | -2.04557700 | -1.40271100 | -1.24814400 |
| H         | -3.23668300 | -0.21887800 | -0.76636200 |
| C         | -1.80020900 | 2.49299400  | -0.67987400 |
| H         | -2.12861900 | 3.46457100  | -0.29497600 |
| H         | -0.81150100 | 2.61444800  | -1.13078100 |
| H         | -2.49146600 | 2.18912500  | -1.47233900 |
| C         | -2.84712400 | -1.71505400 | 0.74784100  |
| H         | -3.63671600 | -2.39618100 | 0.41261200  |
| H         | -2.01358300 | -2.31121300 | 1.12860400  |
| H         | -3.24023000 | -1.12076800 | 1.57901300  |
| <b>4C</b> |             |             |             |
| C         | 0.20762300  | -0.43879300 | 5.72024200  |
| C         | 1.29421000  | 0.24320500  | 5.17143800  |
| C         | 1.27296900  | 0.67105000  | 3.84352700  |
| C         | 0.14027900  | 0.39264700  | 3.05092200  |
| C         | -0.96025100 | -0.30305000 | 3.58841000  |
| C         | -0.90986800 | -0.69974200 | 4.92872900  |
| H         | 2.16776600  | 0.45741800  | 5.78163000  |
| H         | -1.75670500 | -1.23663300 | 5.34811600  |
| O         | 0.17859300  | 0.78547200  | 1.74906700  |
| C         | 2.38998000  | 1.48516200  | 3.23739200  |
| H         | 3.13624200  | 1.73426300  | 4.00495100  |



|    |             |             |             |
|----|-------------|-------------|-------------|
| H  | 1.96499300  | 2.42103600  | 2.86869500  |
| C  | -2.13833500 | -0.66525800 | 2.71706100  |
| H  | -1.81754200 | -1.32072100 | 1.89947700  |
| H  | -2.88426600 | -1.21764700 | 3.30636400  |
| C  | 3.76116000  | 1.71070200  | 1.08174400  |
| C  | 4.30472500  | 0.06290000  | 2.31069900  |
| C  | 4.87659700  | 0.64518800  | 1.00064400  |
| H  | 4.12060500  | 2.63735200  | 1.54551800  |
| H  | 4.83590000  | 0.41503700  | 3.20456100  |
| H  | 4.15480900  | -1.01802100 | 2.37421900  |
| H  | 5.90388600  | 1.00705100  | 1.02182300  |
| H  | 4.72945600  | -0.01865900 | 0.14756900  |
| C  | -3.94560500 | 0.34966900  | 1.18242400  |
| C  | -3.55919900 | 1.44977600  | 2.95377000  |
| C  | -4.54323100 | 1.64000800  | 1.77920400  |
| H  | -4.53267600 | -0.53006000 | 1.46369000  |
| H  | -4.00619900 | 0.91732300  | 3.80257000  |
| H  | -3.00426400 | 2.31552800  | 3.32600800  |
| H  | -5.60752000 | 1.63012900  | 2.01021600  |
| H  | -4.30283200 | 2.50866000  | 1.16342700  |
| N  | -2.76420500 | 0.51950200  | 2.10013000  |
| N  | 3.04998600  | 0.84246600  | 2.08370600  |
| C  | -3.56816300 | 0.33763000  | -0.33301800 |
| C  | 2.96007200  | 1.97542600  | -0.23357900 |
| O  | -2.68445600 | 1.38735500  | -0.59639600 |
| O  | 2.44053400  | 0.78367200  | -0.70297600 |
| Zn | -1.34070300 | 1.40403400  | 0.73995800  |
| Zn | 1.68970500  | -0.30694300 | 0.78402000  |
| C  | 1.56630400  | -2.25734000 | 0.37443000  |
| C  | 2.29058100  | -2.71380700 | -0.74522100 |
| C  | 0.87617800  | -3.24481200 | 1.09100400  |
| C  | 2.32560300  | -4.05863300 | -1.11714200 |
| C  | 0.88577400  | -4.59447600 | 0.74522600  |
| H  | 0.30199500  | -2.95879400 | 1.97257600  |
| C  | 1.61529100  | -5.02993800 | -0.38446900 |
| H  | 2.90548800  | -4.31683300 | -1.99307000 |
| H  | 0.32669000  | -5.29635200 | 1.35016200  |
| O  | 3.01641200  | -1.86393200 | -1.54454400 |
| H  | 2.86173900  | -0.93168300 | -1.28985400 |
| N  | 1.59862500  | -6.36173000 | -0.78982300 |
| C  | 2.43311700  | -6.81213600 | -1.89269500 |
| H  | 2.03308400  | -7.77230000 | -2.23428300 |
| C  | 0.90138600  | -7.36511000 | -0.00313200 |
| H  | 0.72020200  | -8.22596600 | -0.65510700 |

|   |             |             |             |
|---|-------------|-------------|-------------|
| H | 0.23159400  | -0.76473700 | 6.75467500  |
| H | 2.31755000  | -6.11986600 | -2.73452000 |
| H | -0.08807100 | -6.97886800 | 0.26710600  |
| C | 3.92041000  | -6.96915800 | -1.54769300 |
| H | 4.32890000  | -6.03143100 | -1.16248700 |
| H | 4.06576700  | -7.73960200 | -0.78467800 |
| H | 4.49437100  | -7.25531400 | -2.43610900 |
| C | 1.64778500  | -7.82576400 | 1.25676300  |
| H | 2.58797700  | -8.32009900 | 0.99523300  |
| H | 1.88388900  | -6.97351200 | 1.89925900  |
| H | 1.03878100  | -8.53343600 | 1.83076400  |
| C | -4.87595300 | 0.56948200  | -1.10762000 |
| C | -5.12185200 | 1.83192800  | -1.65626100 |
| C | -5.86028700 | -0.41734700 | -1.23317100 |
| C | -6.32016900 | 2.11206800  | -2.31125800 |
| H | -4.35232400 | 2.58824800  | -1.56937700 |
| C | -7.06500100 | -0.15455300 | -1.88303600 |
| H | -5.68879600 | -1.41394200 | -0.84349200 |
| C | -7.28558600 | 1.11386900  | -2.41549000 |
| H | -6.50328300 | 3.09160300  | -2.73859400 |
| H | -7.82090700 | -0.92521800 | -1.98245600 |
| C | -2.91917700 | -1.01167100 | -0.71141200 |
| C | -3.34966700 | -2.24870300 | -0.20897900 |
| C | -1.85910600 | -1.01152600 | -1.62759000 |
| C | -2.78192700 | -3.44468600 | -0.64397300 |
| H | -4.14468000 | -2.30415000 | 0.52684700  |
| C | -1.26850800 | -2.19777900 | -2.06263100 |
| H | -1.51612700 | -0.05974900 | -2.01620800 |
| C | -1.75951100 | -3.41262300 | -1.58995000 |
| H | -3.13373500 | -4.39553900 | -0.26040100 |
| H | -0.44423500 | -2.18279900 | -2.76588800 |
| C | 3.95086000  | 2.58886800  | -1.23719900 |
| C | 4.32700100  | 1.84941300  | -2.36074300 |
| C | 4.52007300  | 3.85279000  | -1.04118600 |
| C | 5.25598600  | 2.35225200  | -3.27145200 |
| H | 3.87691200  | 0.87663500  | -2.51378900 |
| C | 5.45069900  | 4.37057600  | -1.93953100 |
| H | 4.23191100  | 4.45764300  | -0.18712600 |
| C | 5.81203500  | 3.60968600  | -3.05027900 |
| H | 5.54545700  | 1.77558300  | -4.14271700 |
| H | 5.88755800  | 5.35085200  | -1.78630000 |
| C | 1.78242800  | 2.95270300  | 0.00245100  |
| C | 1.75871400  | 3.97649400  | 0.95421900  |
| C | 0.62902100  | 2.75679000  | -0.77325600 |

|    |             |             |             |
|----|-------------|-------------|-------------|
| C  | 0.60252600  | 4.72444900  | 1.20158000  |
| H  | 2.63750700  | 4.19074600  | 1.55228000  |
| C  | -0.53353200 | 3.51021700  | -0.56659400 |
| H  | 0.65693000  | 1.98156400  | -1.53141200 |
| C  | -0.54444000 | 4.47104200  | 0.45608900  |
| H  | 0.59231900  | 5.48764700  | 1.97161000  |
| H  | -1.41190000 | 3.35325400  | -1.18438800 |
| Cl | -1.12267400 | -4.91800300 | -2.21178900 |
| Cl | -8.80248600 | 1.45519700  | -3.23643000 |
| Cl | 6.98503800  | 4.25396100  | -4.19089500 |
| Cl | -2.02069300 | 5.36266500  | 0.78663400  |

**4**

|   |             |             |             |
|---|-------------|-------------|-------------|
| C | 1.19010800  | -5.50974000 | -3.10340500 |
| C | 2.31397100  | -5.04813800 | -2.41673200 |
| C | 2.21752000  | -3.95351100 | -1.56097200 |
| C | 0.97829600  | -3.29142200 | -1.38434000 |
| C | -0.15851600 | -3.73579200 | -2.10046500 |
| C | -0.02666900 | -4.85142400 | -2.93587400 |
| H | 3.27243200  | -5.54735500 | -2.53593400 |
| H | -0.90340400 | -5.20085300 | -3.47556800 |
| O | 0.97549300  | -2.24142100 | -0.54015700 |
| C | 3.38300300  | -3.41819200 | -0.77628800 |
| H | 4.24255400  | -4.10025200 | -0.83424100 |
| H | 3.08804000  | -3.31908100 | 0.27016900  |
| C | -1.48664800 | -3.00536700 | -2.04668600 |
| H | -1.40272800 | -2.06688000 | -2.60608000 |
| H | -2.25965200 | -3.61787200 | -2.53559300 |
| C | 4.70106600  | -1.27770600 | -0.30574100 |
| C | 4.82189800  | -1.99572400 | -2.31169800 |
| C | 5.61341800  | -0.94620800 | -1.50530000 |
| H | 5.17716700  | -1.93251500 | 0.43094400  |
| H | 5.34488900  | -2.95302800 | -2.41875400 |
| H | 4.42589500  | -1.69895900 | -3.28696000 |
| H | 6.67779600  | -1.13894500 | -1.37178100 |
| H | 5.45291900  | 0.07467800  | -1.85052300 |
| C | -3.23356700 | -2.21099400 | -0.23175800 |
| C | -1.94819000 | -3.85221000 | 0.26488300  |
| C | -3.16846000 | -3.21267400 | 0.94538800  |
| H | -4.00677300 | -2.45234900 | -0.96985800 |
| H | -2.17880300 | -4.77616700 | -0.27846500 |
| H | -1.04647000 | -4.00477800 | 0.86410700  |
| H | -4.04264000 | -3.84730200 | 1.08821400  |
| H | -2.91642900 | -2.71581900 | 1.88159900  |

|    |             |             |             |
|----|-------------|-------------|-------------|
| N  | -1.86470800 | -2.68947900 | -0.66173200 |
| N  | 3.79208100  | -2.06464800 | -1.22506600 |
| C  | -3.30031800 | -0.70368100 | 0.22052200  |
| C  | 3.98751300  | -0.04216700 | 0.33802700  |
| O  | -2.11162400 | -0.35250200 | 0.87133500  |
| O  | 3.33970000  | 0.65209900  | -0.67470700 |
| Zn | -0.61015800 | -1.03686900 | -0.13091200 |
| Zn | 2.08847100  | -0.66909500 | -1.35447500 |
| C  | 0.32338400  | 1.91654600  | -3.13503800 |
| C  | 0.00830100  | 1.34874300  | -1.89638900 |
| C  | 0.05565200  | 3.27143200  | -3.32326900 |
| C  | -0.54760300 | 2.12043200  | -0.87866400 |
| C  | -0.50810100 | 4.05612600  | -2.32131300 |
| H  | 0.27560200  | 3.73047100  | -4.28291600 |
| C  | -0.82498100 | 3.48889400  | -1.06647000 |
| H  | -0.81837800 | 1.62531200  | 0.04273200  |
| H  | -0.72929500 | 5.09351700  | -2.53249000 |
| O  | 0.24268100  | 0.01751300  | -1.67122900 |
| N  | -1.40829300 | 4.23525500  | -0.05304300 |
| C  | -1.67737400 | 3.64824800  | 1.25358900  |
| H  | -2.47236300 | 4.23860400  | 1.72226900  |
| C  | -1.52292800 | 5.68315600  | -0.16270900 |
| H  | -0.65514100 | 6.08204800  | -0.69970000 |
| H  | 1.26056500  | -6.36958900 | -3.76108200 |
| H  | -2.08608400 | 2.64341900  | 1.12546600  |
| H  | -1.46785600 | 6.10125100  | 0.84812500  |
| C  | -0.45005000 | 3.60527800  | 2.17180600  |
| H  | 0.35902400  | 3.03310200  | 1.71025300  |
| H  | -0.07212200 | 4.61327400  | 2.37072700  |
| H  | -0.69824300 | 3.13981900  | 3.13187300  |
| C  | -2.82123000 | 6.13824300  | -0.83715200 |
| H  | -2.90824600 | 5.71835900  | -1.84282700 |
| H  | -3.68993900 | 5.80862600  | -0.25755400 |
| H  | -2.85954900 | 7.23047100  | -0.91288300 |
| C  | -4.48064000 | -0.63361500 | 1.19723100  |
| C  | -4.24886700 | -0.42778100 | 2.55803700  |
| C  | -5.79645500 | -0.80341000 | 0.75133100  |
| C  | -5.30719700 | -0.39560800 | 3.46691100  |
| H  | -3.22528700 | -0.29298000 | 2.88674300  |
| C  | -6.86510000 | -0.77980900 | 1.64472600  |
| H  | -5.99385900 | -0.93459800 | -0.30877700 |
| C  | -6.60675700 | -0.57601700 | 3.00008100  |
| H  | -5.12801100 | -0.23321700 | 4.52396700  |
| H  | -7.88453800 | -0.90836400 | 1.29898700  |

|    |             |             |             |
|----|-------------|-------------|-------------|
| C  | -3.53487100 | 0.29072100  | -0.92844900 |
| C  | -3.91308900 | 1.59950400  | -0.59361500 |
| C  | -3.27292200 | 0.01180300  | -2.27016400 |
| C  | -3.99122600 | 2.60331100  | -1.54940900 |
| H  | -4.14542400 | 1.83154900  | 0.43954600  |
| C  | -3.32302100 | 1.01087000  | -3.24637400 |
| H  | -3.02547800 | -0.99270600 | -2.58580600 |
| C  | -3.67290300 | 2.30240600  | -2.87344400 |
| H  | -4.27296800 | 3.61122400  | -1.27344700 |
| H  | -3.09128300 | 0.78623500  | -4.28091200 |
| C  | 5.06345400  | 0.82807400  | 0.99484700  |
| C  | 5.28676900  | 2.11535800  | 0.50198400  |
| C  | 5.84400300  | 0.36629400  | 2.06087600  |
| C  | 6.27423500  | 2.93101600  | 1.05412700  |
| H  | 4.66546400  | 2.46068000  | -0.31551500 |
| C  | 6.83657200  | 1.16645100  | 2.62284500  |
| H  | 5.67602100  | -0.62265600 | 2.47597500  |
| C  | 7.04317300  | 2.44601200  | 2.10919800  |
| H  | 6.44594100  | 3.93137100  | 0.67271100  |
| H  | 7.43939400  | 0.80857900  | 3.44973600  |
| C  | 2.92999100  | -0.48791400 | 1.38592500  |
| C  | 3.03171400  | -1.62559000 | 2.19279300  |
| C  | 1.74489400  | 0.26499000  | 1.45928800  |
| C  | 1.96355300  | -2.05573700 | 2.98361700  |
| H  | 3.93826900  | -2.22132800 | 2.19277300  |
| C  | 0.66537800  | -0.14208200 | 2.24816900  |
| H  | 1.66989700  | 1.16313900  | 0.85511000  |
| C  | 0.77899700  | -1.32465000 | 2.98564700  |
| H  | 2.04389400  | -2.95976700 | 3.57660500  |
| H  | -0.25109700 | 0.43679700  | 2.29035900  |
| Cl | -3.73851600 | 3.57159800  | -4.08667900 |
| Cl | -7.94951100 | -0.53907800 | 4.13704600  |
| Cl | 8.29360400  | 3.46418400  | 2.81188900  |
| Cl | -0.58981600 | -1.89611500 | 3.92313400  |
| H  | 0.74030100  | 1.29988300  | -3.92514300 |

2

|   |             |             |             |
|---|-------------|-------------|-------------|
| C | -4.85134400 | 1.44644700  | -0.00002100 |
| C | -5.29386200 | 0.11167500  | 0.00001900  |
| C | -4.38714100 | -0.94439300 | 0.00003300  |
| C | -3.02389700 | -0.64359200 | 0.00000100  |
| C | -2.56312500 | 0.70150800  | -0.00004100 |
| C | -3.49640600 | 1.74947600  | -0.00005200 |
| H | -5.58114000 | 2.25001600  | -0.00002700 |

|   |             |             |             |
|---|-------------|-------------|-------------|
| H | -6.35850100 | -0.10020700 | 0.00004000  |
| H | -4.73223800 | -1.97298400 | 0.00006100  |
| H | -3.14026400 | 2.77394700  | -0.00008000 |
| S | -1.64847900 | -1.72336500 | -0.00000900 |
| N | -1.19217800 | 0.85807500  | -0.00004800 |
| C | -0.58744800 | -0.29526400 | -0.00003100 |
| N | 0.76934100  | -0.55130800 | -0.00003700 |
| C | 1.57837800  | 0.45447800  | 0.00017200  |
| H | 1.19947100  | 1.48252900  | 0.00035000  |
| C | 3.02477200  | 0.27951600  | 0.00008800  |
| C | 3.60927500  | -1.00041500 | 0.00004100  |
| C | 3.85161900  | 1.41463000  | 0.00005100  |
| C | 4.99163600  | -1.13364800 | -0.00004000 |
| H | 2.95636600  | -1.86616500 | 0.00007100  |
| C | 5.23758400  | 1.27718400  | -0.00004400 |
| H | 3.39900700  | 2.40259100  | 0.00009600  |
| C | 5.80871400  | 0.00344500  | -0.00008800 |
| H | 5.44029000  | -2.12232600 | -0.00006200 |
| H | 5.87092400  | 2.15876300  | -0.00008100 |
| H | 6.88906900  | -0.10597000 | -0.00015300 |

**5a**

|   |             |             |             |
|---|-------------|-------------|-------------|
| C | 0.23530700  | -5.14913100 | -4.26482900 |
| C | 1.41756800  | -4.72334200 | -3.65985900 |
| C | 1.42520100  | -3.65061300 | -2.76758700 |
| C | 0.21693500  | -2.97531600 | -2.47652400 |
| C | -0.97909100 | -3.38105800 | -3.11016900 |
| C | -0.94989900 | -4.47001900 | -3.98583700 |
| H | 2.35302900  | -5.23387000 | -3.87551400 |
| H | -1.87483800 | -4.77654500 | -4.46829700 |
| O | 0.21914700  | -1.96388100 | -1.60328400 |
| C | 2.69700400  | -3.18226500 | -2.11270100 |
| H | 3.52918600  | -3.84927700 | -2.38275000 |
| H | 2.59937600  | -3.19375100 | -1.02192200 |
| C | -2.25413300 | -2.60884900 | -2.89298300 |
| H | -2.13759600 | -1.56539400 | -3.21345300 |
| H | -3.04806900 | -3.04120200 | -3.52170300 |
| C | 4.31449300  | -1.18717000 | -2.04078000 |
| C | 3.40306400  | -1.52639700 | -3.91951600 |
| C | 4.42421100  | -0.48657200 | -3.41046500 |
| H | 5.09080200  | -1.95356500 | -1.93902700 |
| H | 3.88225900  | -2.40315400 | -4.37379500 |
| H | 2.57998600  | -1.19735500 | -4.55942000 |
| H | 5.40627300  | -0.47133700 | -3.88143000 |

|    |             |             |             |
|----|-------------|-------------|-------------|
| H  | 4.01446500  | 0.52463300  | -3.37396600 |
| C  | -4.08905300 | -2.04562500 | -1.29777200 |
| C  | -3.13689200 | -3.93270700 | -0.98335700 |
| C  | -4.56900000 | -3.40666400 | -0.73644900 |
| H  | -4.52596600 | -1.81733800 | -2.27457400 |
| H  | -3.05651600 | -4.69979500 | -1.75857300 |
| H  | -2.57645000 | -4.27203000 | -0.10801200 |
| H  | -5.34009800 | -3.89313800 | -1.33575600 |
| H  | -4.88891300 | -3.39328100 | 0.30488900  |
| N  | -2.69321500 | -2.58433200 | -1.47648900 |
| N  | 3.02231100  | -1.79665100 | -2.50274500 |
| C  | -4.14385700 | -0.70873500 | -0.48627400 |
| C  | 4.18842400  | -0.30636600 | -0.76302300 |
| O  | -3.07489700 | 0.07208100  | -0.91785800 |
| O  | 3.04897800  | 0.48086300  | -0.84650400 |
| Zn | -1.33525600 | -0.81985800 | -0.82214400 |
| Zn | 1.55035200  | -0.42393800 | -1.63871300 |
| C  | -1.16283600 | 2.68162900  | -2.35624300 |
| C  | -0.21354100 | 1.94981200  | -1.63303400 |
| C  | -1.18990000 | 4.06526700  | -2.19024400 |
| C  | 0.66470300  | 2.59562000  | -0.75893800 |
| C  | -0.31011700 | 4.72725100  | -1.33697100 |
| H  | -1.91893800 | 4.65352300  | -2.74117400 |
| C  | 0.64179900  | 3.99443800  | -0.59302100 |
| H  | 1.36407000  | 1.98303800  | -0.20722700 |
| H  | -0.37626300 | 5.80315600  | -1.24760700 |
| O  | -0.14077900 | 0.59645800  | -1.77133200 |
| N  | 1.51340600  | 4.60556700  | 0.29625400  |
| C  | 2.63246600  | 3.87572100  | 0.88346600  |
| H  | 2.97020200  | 3.09995900  | 0.19257400  |
| H  | 3.47096400  | 4.57394200  | 0.98960400  |
| C  | 1.46820100  | 6.03859400  | 0.53235500  |
| H  | 0.42346100  | 6.35989700  | 0.58072100  |
| H  | 1.88569600  | 6.22327000  | 1.52873300  |
| N  | -0.76663800 | 1.36596300  | 2.05401600  |
| C  | -1.66735500 | 1.80061300  | 1.22756300  |
| H  | -2.22524200 | 1.13759500  | 0.56007300  |
| C  | -2.06974000 | 3.19173500  | 1.19591800  |
| C  | -1.46320300 | 4.17027500  | 2.00319900  |
| C  | -3.13304400 | 3.54269100  | 0.34786600  |
| C  | -1.91735400 | 5.48084500  | 1.95497800  |
| H  | -0.64577100 | 3.87965000  | 2.65179200  |
| C  | -3.58935400 | 4.85729300  | 0.31015600  |
| H  | -3.57986400 | 2.77510900  | -0.27455800 |

|   |             |             |             |
|---|-------------|-------------|-------------|
| C | -2.98042800 | 5.82551600  | 1.10915700  |
| H | -1.45230000 | 6.23960400  | 2.57688800  |
| H | -4.41191600 | 5.12770600  | -0.34437600 |
| H | -3.33394500 | 6.85212600  | 1.07920900  |
| C | 0.40811400  | -4.49619600 | 1.72614300  |
| C | 0.74552900  | -4.44584100 | 3.08696400  |
| C | 0.67941300  | -3.24547200 | 3.78698800  |
| C | 0.28227700  | -2.10003500 | 3.09790900  |
| C | -0.05331700 | -2.13438000 | 1.72436600  |
| C | 0.00760300  | -3.35540700 | 1.03830700  |
| H | 0.46086700  | -5.44087100 | 1.19414800  |
| H | 1.06680500  | -5.34582100 | 3.60035300  |
| H | 0.94534600  | -3.19806100 | 4.83639300  |
| H | -0.24127300 | -3.39481400 | -0.01054800 |
| S | 0.11064300  | -0.47417600 | 3.70533400  |
| N | -0.45621500 | -0.90287500 | 1.19424000  |
| C | -0.44093600 | 0.04807000  | 2.11723400  |
| H | 0.23910700  | -5.98992200 | -4.95025500 |
| C | 2.23659800  | 6.85814600  | -0.51142600 |
| H | 1.83102200  | 6.68677000  | -1.51219500 |
| H | 2.17605400  | 7.92952200  | -0.29092800 |
| H | 3.29375900  | 6.57355300  | -0.52476900 |
| C | 2.30654300  | 3.24934300  | 2.24311700  |
| H | 2.03060300  | 4.01931200  | 2.97215900  |
| H | 1.46814700  | 2.55217100  | 2.16289800  |
| H | 3.17659200  | 2.71089000  | 2.63559000  |
| C | -4.04909100 | -0.83680700 | 1.04989700  |
| C | -4.52009600 | 0.22481800  | 1.83957900  |
| C | -3.35175000 | -1.86062700 | 1.70076700  |
| C | -4.30932700 | 0.26717100  | 3.21475500  |
| H | -5.04604300 | 1.04587800  | 1.36570700  |
| C | -3.14636200 | -1.85061900 | 3.08085100  |
| H | -2.91542200 | -2.67585600 | 1.14287800  |
| C | -3.62360300 | -0.78013000 | 3.82859000  |
| H | -4.66584200 | 1.10429800  | 3.80400400  |
| H | -2.59668400 | -2.65228000 | 3.55961400  |
| C | -5.47562700 | -0.05325700 | -0.86981800 |
| C | -6.69799100 | -0.57204100 | -0.42736700 |
| C | -5.47867900 | 1.05575100  | -1.71776900 |
| C | -7.90489100 | 0.00407200  | -0.81901700 |
| H | -6.71064700 | -1.42246000 | 0.24799900  |
| C | -6.67736300 | 1.64936000  | -2.11552600 |
| H | -4.52305200 | 1.44112300  | -2.05447900 |
| C | -7.88088200 | 1.11512200  | -1.66175300 |



|    |             |             |             |
|----|-------------|-------------|-------------|
| H  | -8.85170400 | -0.39417000 | -0.47211400 |
| H  | -6.68031900 | 2.51458900  | -2.76924800 |
| C  | 5.43992600  | 0.58916000  | -0.73864500 |
| C  | 5.32201400  | 1.92326900  | -1.13911200 |
| C  | 6.70084300  | 0.10450900  | -0.37512200 |
| C  | 6.43373200  | 2.76373600  | -1.17511600 |
| H  | 4.34044500  | 2.28954600  | -1.41312200 |
| C  | 7.82432100  | 0.92943500  | -0.40810500 |
| H  | 6.81291500  | -0.92125200 | -0.03909700 |
| C  | 7.67828700  | 2.25605000  | -0.80932900 |
| H  | 6.33760900  | 3.79955400  | -1.48119300 |
| H  | 8.79906500  | 0.55341800  | -0.11852400 |
| C  | 4.14146100  | -1.15707300 | 0.52281700  |
| C  | 4.70583000  | -2.43037700 | 0.65823600  |
| C  | 3.53226200  | -0.58252700 | 1.64690700  |
| C  | 4.67534000  | -3.11383700 | 1.87650800  |
| H  | 5.18505000  | -2.91811500 | -0.18324200 |
| C  | 3.51527000  | -1.23629100 | 2.87467200  |
| H  | 3.07570400  | 0.39413600  | 1.54069800  |
| C  | 4.08994500  | -2.50221300 | 2.97886500  |
| H  | 5.11010500  | -4.10267800 | 1.96812800  |
| H  | 3.06229200  | -0.76980700 | 3.74063500  |
| Cl | 9.08879700  | 3.30724800  | -0.84704400 |
| Cl | 4.08631300  | -3.33376800 | 4.52879400  |
| Cl | -9.39895100 | 1.85652600  | -2.15421800 |
| Cl | -3.34356300 | -0.74002700 | 5.56185800  |
| H  | -1.84783700 | 2.16425600  | -3.01790900 |

**TS-6a**

|   |             |             |             |
|---|-------------|-------------|-------------|
| C | 0.31840400  | -6.41981100 | -1.56489500 |
| C | 1.47154700  | -5.70405000 | -1.25496300 |
| C | 1.45077700  | -4.31531200 | -1.09867800 |
| C | 0.23741400  | -3.61086200 | -1.27685300 |
| C | -0.93365400 | -4.33565300 | -1.58630400 |
| C | -0.87809800 | -5.72389400 | -1.72284200 |
| H | 2.41482000  | -6.22752700 | -1.12118100 |
| H | -1.79172000 | -6.26072600 | -1.96517400 |
| O | 0.17460500  | -2.27339600 | -1.15511100 |
| C | 2.71662200  | -3.58959600 | -0.73606300 |
| H | 3.54646700  | -4.30717500 | -0.65717700 |
| H | 2.62225100  | -3.09636500 | 0.23916100  |
| C | -2.23432300 | -3.60562300 | -1.74161100 |
| H | -2.16173600 | -2.80273200 | -2.48423200 |
| H | -3.00504200 | -4.30515800 | -2.10055400 |

|    |             |             |             |
|----|-------------|-------------|-------------|
| C  | 4.38015400  | -1.89119800 | -1.67686000 |
| C  | 3.28259600  | -2.93521600 | -3.14455100 |
| C  | 4.35698900  | -1.82601700 | -3.21692200 |
| H  | 5.14723000  | -2.59581200 | -1.33593200 |
| H  | 3.71077000  | -3.94303300 | -3.21845700 |
| H  | 2.40224200  | -2.87225000 | -3.78987700 |
| H  | 5.28590200  | -2.05500500 | -3.73779700 |
| H  | 3.95677900  | -0.87405100 | -3.57183400 |
| C  | -4.09767600 | -2.50956500 | -0.53448400 |
| C  | -3.04106700 | -3.98588100 | 0.58838800  |
| C  | -4.49282600 | -3.45887800 | 0.62265900  |
| H  | -4.54295900 | -2.81229000 | -1.48711800 |
| H  | -2.93681500 | -5.01609900 | 0.23692600  |
| H  | -2.45235600 | -3.87184900 | 1.50231700  |
| H  | -5.25488000 | -4.19610400 | 0.36506200  |
| H  | -4.77859200 | -2.95925900 | 1.54752000  |
| N  | -2.67266000 | -2.98440300 | -0.47105700 |
| N  | 3.04146200  | -2.55091100 | -1.72529000 |
| C  | -4.23177500 | -0.95397700 | -0.46078100 |
| C  | 4.38212300  | -0.58261900 | -0.84212400 |
| O  | -3.16157100 | -0.42132400 | -1.18829800 |
| O  | 3.22967800  | 0.13448100  | -1.12485100 |
| Zn | -1.39050000 | -1.00466700 | -0.57474500 |
| Zn | 1.62001700  | -0.89903500 | -1.39026800 |
| C  | -1.16766200 | 2.38649500  | -1.61225900 |
| C  | 0.06506600  | 1.63581500  | -1.47269000 |
| C  | -1.03009200 | 3.81974600  | -1.70300800 |
| C  | 1.20943200  | 2.28771700  | -1.03853400 |
| C  | 0.09909900  | 4.46267100  | -1.30993700 |
| H  | -1.89963900 | 4.39762000  | -1.99527000 |
| C  | 1.24467000  | 3.69438700  | -0.88794900 |
| H  | 2.08948000  | 1.69563700  | -0.83931000 |
| H  | 0.13113200  | 5.54269400  | -1.32209200 |
| O  | 0.02743400  | 0.32319100  | -1.67068600 |
| N  | 2.34152200  | 4.32111500  | -0.39228800 |
| C  | 3.49095000  | 3.58800600  | 0.15295400  |
| H  | 3.62500800  | 2.64867000  | -0.38099900 |
| H  | 4.38506300  | 4.18565700  | -0.05164300 |
| C  | 2.40086800  | 5.77710500  | -0.23751700 |
| H  | 1.43175200  | 6.15238500  | 0.10055300  |
| H  | 3.10500500  | 5.98601500  | 0.57193900  |
| N  | -1.18365900 | 2.17660800  | 1.15867800  |
| C  | -2.04619600 | 2.12462400  | 0.09065600  |
| H  | -2.45637100 | 1.15960300  | -0.20423100 |

|   |             |             |             |
|---|-------------|-------------|-------------|
| C | -3.11563500 | 3.16814500  | 0.10140900  |
| C | -3.09219800 | 4.22128200  | 1.01983800  |
| C | -4.18826300 | 3.06163300  | -0.79452100 |
| C | -4.12951900 | 5.15354500  | 1.04272400  |
| H | -2.26729000 | 4.27103800  | 1.72067200  |
| C | -5.22359200 | 3.99259300  | -0.77195200 |
| H | -4.22174700 | 2.22447700  | -1.48348200 |
| C | -5.19716500 | 5.04435700  | 0.14873300  |
| H | -4.10962400 | 5.96349900  | 1.76650300  |
| H | -6.05670500 | 3.88847800  | -1.46116300 |
| H | -6.00649700 | 5.76819600  | 0.17323400  |
| C | 0.76808800  | -3.16617000 | 3.01699600  |
| C | 1.19310500  | -2.54349100 | 4.19491500  |
| C | 1.03418800  | -1.16604600 | 4.35579300  |
| C | 0.45992300  | -0.42961500 | 3.32352400  |
| C | 0.02427200  | -1.04602300 | 2.12643100  |
| C | 0.17937700  | -2.43275300 | 1.98613900  |
| H | 0.88967100  | -4.23840400 | 2.89667700  |
| H | 1.65436900  | -3.12427600 | 4.98610200  |
| H | 1.36601200  | -0.67774800 | 5.26595700  |
| H | -0.15383000 | -2.92972700 | 1.08626500  |
| S | 0.16071100  | 1.29475500  | 3.23824800  |
| N | -0.54811200 | -0.18930800 | 1.19085700  |
| C | -0.61895900 | 1.09201800  | 1.62979200  |
| H | 0.35122800  | -7.49799600 | -1.67937400 |
| C | 2.85189200  | 6.48425800  | -1.51703200 |
| H | 2.15342900  | 6.29474400  | -2.33664700 |
| H | 2.91288900  | 7.56535500  | -1.35722900 |
| H | 3.83888200  | 6.12734600  | -1.82672000 |
| C | 3.33945100  | 3.34119700  | 1.65586300  |
| H | 3.27009300  | 4.28429200  | 2.20730300  |
| H | 2.43279400  | 2.76592900  | 1.86233900  |
| H | 4.19961200  | 2.78443600  | 2.03790000  |
| C | -4.22237000 | -0.38253900 | 0.97782400  |
| C | -4.96396100 | 0.76280000  | 1.29581900  |
| C | -3.35518800 | -0.87777000 | 1.96216700  |
| C | -4.82570300 | 1.41269200  | 2.52040500  |
| H | -5.64055100 | 1.18501800  | 0.56533900  |
| C | -3.20928500 | -0.25462900 | 3.19937500  |
| H | -2.74166400 | -1.74741400 | 1.77203500  |
| C | -3.93895600 | 0.90092300  | 3.46250700  |
| H | -5.37773800 | 2.32266700  | 2.72355500  |
| H | -2.51328000 | -0.64526400 | 3.93245300  |
| C | -5.56083400 | -0.62685600 | -1.15007900 |

|    |             |             |             |
|----|-------------|-------------|-------------|
| C  | -6.78386100 | -1.00384900 | -0.58120600 |
| C  | -5.56564500 | 0.00774900  | -2.39260100 |
| C  | -7.98921900 | -0.74183400 | -1.22899000 |
| H  | -6.79987700 | -1.48661100 | 0.39137300  |
| C  | -6.76293000 | 0.28455000  | -3.05439700 |
| H  | -4.61114600 | 0.27822900  | -2.82800700 |
| C  | -7.96563600 | -0.09323900 | -2.46341300 |
| H  | -8.93526500 | -1.02741600 | -0.78308000 |
| H  | -6.76457500 | 0.78457500  | -4.01666400 |
| C  | 5.60927000  | 0.24114500  | -1.27516000 |
| C  | 5.41771000  | 1.31483100  | -2.15197500 |
| C  | 6.91228800  | -0.05887000 | -0.86354700 |
| C  | 6.49260400  | 2.07706400  | -2.60670000 |
| H  | 4.40622200  | 1.54869600  | -2.46030900 |
| C  | 8.00007300  | 0.69065000  | -1.31004600 |
| H  | 7.09231300  | -0.86929200 | -0.16669800 |
| C  | 7.77911800  | 1.75577500  | -2.18044500 |
| H  | 6.33616400  | 2.91044500  | -3.28268100 |
| H  | 9.00632300  | 0.45792700  | -0.98045000 |
| C  | 4.44869200  | -0.90623600 | 0.66558800  |
| C  | 5.22039700  | -1.93740300 | 1.21815200  |
| C  | 3.71397700  | -0.09763100 | 1.53879400  |
| C  | 5.27186200  | -2.14540300 | 2.59719100  |
| H  | 5.79427300  | -2.60461300 | 0.58403800  |
| C  | 3.77474600  | -0.26977800 | 2.91808400  |
| H  | 3.08425400  | 0.67390300  | 1.11929200  |
| C  | 4.55422200  | -1.29925700 | 3.43782800  |
| H  | 5.86416200  | -2.95225700 | 3.01367900  |
| H  | 3.21363500  | 0.38143900  | 3.57478100  |
| Cl | 9.14357900  | 2.71278900  | -2.74181300 |
| Cl | 4.62353700  | -1.54364300 | 5.17650900  |
| Cl | -9.48318000 | 0.25399800  | -3.28502300 |
| Cl | -3.72628400 | 1.72830300  | 4.99765300  |
| H  | -1.92640200 | 1.91518300  | -2.23038800 |

**5b**

|   |             |             |             |
|---|-------------|-------------|-------------|
| C | -1.02218300 | -4.36496200 | -4.73883900 |
| C | -2.04702900 | -3.47346800 | -4.41507200 |
| C | -1.90044500 | -2.54598600 | -3.38254900 |
| C | -0.69791800 | -2.52547300 | -2.64585200 |
| C | 0.34642200  | -3.41558700 | -2.97134000 |
| C | 0.17119100  | -4.32404600 | -4.01775000 |
| H | -2.97624500 | -3.48808500 | -4.97912200 |
| H | 0.97612800  | -5.01454100 | -4.25790800 |

|    |             |             |             |
|----|-------------|-------------|-------------|
| O  | -0.55594400 | -1.67904400 | -1.62427100 |
| C  | -2.96724000 | -1.53852100 | -3.04701800 |
| H  | -3.78496700 | -1.60271300 | -3.78286600 |
| H  | -2.54649400 | -0.53007700 | -3.10264800 |
| C  | 1.60777600  | -3.35868600 | -2.15934300 |
| H  | 1.38689900  | -3.46285400 | -1.09014400 |
| H  | 2.27406700  | -4.18870400 | -2.43619000 |
| C  | -4.69316200 | -0.92273300 | -1.25827000 |
| C  | -4.27256900 | -2.98223100 | -1.46309400 |
| C  | -5.27874600 | -2.19118000 | -0.61174700 |
| H  | -5.28559300 | -0.60844900 | -2.12612200 |
| H  | -4.70687700 | -3.34163700 | -2.40589300 |
| H  | -3.71754300 | -3.79271400 | -0.99245400 |
| H  | -6.33874000 | -2.38507000 | -0.77363500 |
| H  | -5.04599200 | -2.22642800 | 0.45318900  |
| C  | 3.68445900  | -2.06754700 | -1.67746000 |
| C  | 2.96361900  | -1.94101600 | -3.68896200 |
| C  | 4.37306400  | -1.95305400 | -3.06020500 |
| H  | 3.85602700  | -3.02711200 | -1.18279200 |
| H  | 2.72545700  | -2.79113800 | -4.33256900 |
| H  | 2.67885500  | -1.02422800 | -4.20979200 |
| H  | 4.98201000  | -2.81699800 | -3.33179700 |
| H  | 4.95449600  | -1.04395000 | -3.21211600 |
| N  | 2.32496000  | -2.06413200 | -2.33155600 |
| N  | -3.49166700 | -1.72676700 | -1.68519800 |
| C  | 3.85946600  | -0.95607600 | -0.57491800 |
| C  | -4.37507300 | 0.25196000  | -0.29627800 |
| O  | 2.65556800  | -0.82018800 | 0.10853300  |
| O  | -3.45425100 | -0.18163700 | 0.65083800  |
| Zn | 1.07729300  | -0.71853800 | -0.98850200 |
| Zn | -1.87398400 | -0.97226900 | -0.15716000 |
| C  | -1.08629900 | 1.66688800  | 1.69989400  |
| C  | -0.24626600 | 1.53172100  | 0.58624400  |
| C  | -0.95876100 | 2.79735900  | 2.49848000  |
| C  | 0.69937700  | 2.51771700  | 0.29633000  |
| C  | -0.01310900 | 3.78053800  | 2.23461500  |
| H  | -1.61047100 | 2.91400200  | 3.36009000  |
| C  | 0.85827300  | 3.64838800  | 1.12828400  |
| H  | 1.32629800  | 2.37229700  | -0.57380600 |
| H  | 0.05816700  | 4.63106700  | 2.89763600  |
| O  | -0.34496400 | 0.43729100  | -0.21016400 |
| N  | 1.86332100  | 4.57638700  | 0.89315900  |
| C  | 2.61304000  | 4.53963800  | -0.35464500 |
| H  | 3.49849300  | 5.16919700  | -0.22547900 |

|   |             |             |             |
|---|-------------|-------------|-------------|
| H | 2.98771400  | 3.52444400  | -0.50852500 |
| C | 1.99248400  | 5.75784200  | 1.73260800  |
| H | 1.91393500  | 5.45182500  | 2.78139800  |
| H | 3.01204500  | 6.13637800  | 1.60440700  |
| N | -0.16459600 | -1.00282200 | 3.26249400  |
| C | 0.85464300  | -0.42665500 | 2.70591400  |
| H | 1.30023700  | -0.82934400 | 1.79284600  |
| C | 1.54236400  | 0.71090200  | 3.29143600  |
| C | 1.18554800  | 1.23369800  | 4.54720700  |
| C | 2.60505300  | 1.28389400  | 2.57117900  |
| C | 1.88967400  | 2.30768500  | 5.07306800  |
| H | 0.35944200  | 0.78201500  | 5.08531000  |
| C | 3.30301700  | 2.36599100  | 3.10256000  |
| H | 2.85550900  | 0.87254100  | 1.59927300  |
| C | 2.94862900  | 2.87548600  | 4.35124600  |
| H | 1.61815100  | 2.71134500  | 6.04367000  |
| H | 4.11217400  | 2.81459400  | 2.53567300  |
| H | 3.49400600  | 3.71757100  | 4.76788400  |
| C | -1.92037600 | -5.71040300 | 0.04142400  |
| C | -2.08836800 | -6.41563000 | 1.24162300  |
| C | -1.86929600 | -5.79058300 | 2.46704400  |
| C | -1.49189000 | -4.44777900 | 2.46661900  |
| C | -1.35435200 | -3.71604000 | 1.26413000  |
| C | -1.55709400 | -4.36703200 | 0.04211200  |
| H | -2.06915600 | -6.21518900 | -0.90777100 |
| H | -2.37778600 | -7.46124500 | 1.21872500  |
| H | -1.97707600 | -6.33675700 | 3.39806900  |
| H | -1.41302800 | -3.83577700 | -0.88620500 |
| S | -1.06783300 | -3.42703100 | 3.82281600  |
| N | -0.95655100 | -2.38169300 | 1.42081000  |
| C | -0.69607400 | -2.11575500 | 2.69030300  |
| H | -1.15158000 | -5.07927800 | -5.54502800 |
| C | 0.98869700  | 6.87941800  | 1.43240200  |
| H | -0.03837900 | 6.51097700  | 1.49769700  |
| H | 1.10544900  | 7.70202900  | 2.14660200  |
| H | 1.13757900  | 7.28000200  | 0.42597000  |
| C | 1.82550000  | 5.00134300  | -1.58691000 |
| H | 0.91852700  | 4.40773400  | -1.72209800 |
| H | 1.52208300  | 6.04714100  | -1.48873500 |
| H | 2.43907600  | 4.91220300  | -2.48822700 |
| C | 4.25681800  | 0.41681300  | -1.17056000 |
| C | 5.32499400  | 1.17013300  | -0.67060000 |
| C | 3.50118500  | 0.98789100  | -2.20723800 |
| C | 5.66128900  | 2.41395600  | -1.20868600 |

|              |             |             |             |
|--------------|-------------|-------------|-------------|
| H            | 5.91897300  | 0.78149600  | 0.14709400  |
| C            | 3.82570500  | 2.21829400  | -2.77147100 |
| H            | 2.64866600  | 0.45900500  | -2.62125000 |
| C            | 4.92104400  | 2.92104300  | -2.27087200 |
| H            | 6.49537600  | 2.97948400  | -0.80883500 |
| H            | 3.23615000  | 2.62962900  | -3.58248700 |
| C            | 4.95314300  | -1.47491400 | 0.36548500  |
| C            | 6.22081800  | -1.82412600 | -0.12052500 |
| C            | 4.68845300  | -1.64056200 | 1.72521800  |
| C            | 7.20553900  | -2.32343000 | 0.72873300  |
| H            | 6.45487100  | -1.69137200 | -1.17267200 |
| C            | 5.66383000  | -2.13517100 | 2.59213500  |
| H            | 3.70858000  | -1.37458700 | 2.09795000  |
| C            | 6.91513700  | -2.47367900 | 2.08467400  |
| H            | 8.18563300  | -2.58983900 | 0.34963100  |
| H            | 5.45498900  | -2.25652300 | 3.64907400  |
| C            | -5.70380100 | 0.62217000  | 0.37833400  |
| C            | -5.90020700 | 0.32463700  | 1.72781100  |
| C            | -6.74292100 | 1.22447800  | -0.34044600 |
| C            | -7.11246700 | 0.61290100  | 2.35546000  |
| H            | -5.07976300 | -0.12740400 | 2.27221200  |
| C            | -7.96222900 | 1.51500900  | 0.26780500  |
| H            | -6.59498800 | 1.49101900  | -1.38296100 |
| C            | -8.13455500 | 1.20192700  | 1.61557100  |
| H            | -7.26421300 | 0.38574200  | 3.40492900  |
| H            | -8.76567100 | 1.98472600  | -0.28835000 |
| C            | -3.83082200 | 1.49379600  | -1.03433100 |
| C            | -3.80216900 | 1.66489900  | -2.42165900 |
| C            | -3.29900900 | 2.51574300  | -0.23736800 |
| C            | -3.19952300 | 2.78576400  | -3.00300600 |
| H            | -4.24962900 | 0.93120600  | -3.08128200 |
| C            | -2.68417100 | 3.63234600  | -0.79015100 |
| H            | -3.33931100 | 2.40837200  | 0.83654900  |
| C            | -2.62850600 | 3.74887800  | -2.17864700 |
| H            | -3.17182100 | 2.90338900  | -4.08052100 |
| H            | -2.23259800 | 4.38381600  | -0.15299900 |
| Cl           | -9.67063800 | 1.56785100  | 2.39603700  |
| Cl           | -1.82799200 | 5.14197600  | -2.90094900 |
| Cl           | 8.15186900  | -3.09871500 | 3.16656700  |
| Cl           | 5.35070500  | 4.47268700  | -2.96858600 |
| H            | -1.85236500 | 0.92781500  | 1.89177100  |
| <b>TS-6b</b> |             |             |             |
| C            | -1.03027400 | -4.64227000 | -4.54434200 |

|    |             |             |             |
|----|-------------|-------------|-------------|
| C  | -2.04463700 | -3.72713400 | -4.25357600 |
| C  | -1.87879000 | -2.75359000 | -3.26814900 |
| C  | -0.67066100 | -2.71659500 | -2.54219600 |
| C  | 0.37067400  | -3.61950400 | -2.84270300 |
| C  | 0.17432200  | -4.57348600 | -3.84503700 |
| H  | -2.97800900 | -3.75833000 | -4.81003900 |
| H  | 0.97316400  | -5.27661000 | -4.06801100 |
| O  | -0.51865400 | -1.82033000 | -1.56395600 |
| C  | -2.91523800 | -1.69232300 | -3.00249700 |
| H  | -3.73809300 | -1.78953000 | -3.72847200 |
| H  | -2.46366400 | -0.70480300 | -3.14135000 |
| C  | 1.65541200  | -3.53078100 | -2.06473200 |
| H  | 1.46721400  | -3.61148200 | -0.98691800 |
| H  | 2.32076100  | -4.36191700 | -2.33894600 |
| C  | -4.59503100 | -0.82694800 | -1.27986900 |
| C  | -4.30047200 | -2.92293600 | -1.29792700 |
| C  | -5.25015200 | -1.99628400 | -0.51908400 |
| H  | -5.17160000 | -0.56104200 | -2.17429200 |
| H  | -4.76218500 | -3.33318300 | -2.20608800 |
| H  | -3.78534900 | -3.71831900 | -0.76096100 |
| H  | -6.32131600 | -2.13865300 | -0.65917600 |
| H  | -5.01100900 | -1.95279200 | 0.54420800  |
| C  | 3.72678200  | -2.17619700 | -1.64992700 |
| C  | 2.97511500  | -2.13383700 | -3.65600200 |
| C  | 4.39245300  | -2.09316300 | -3.04625800 |
| H  | 3.93049400  | -3.10947300 | -1.11895300 |
| H  | 2.74870400  | -3.00781200 | -4.27143900 |
| H  | 2.66096000  | -1.23879800 | -4.19758400 |
| H  | 5.01715600  | -2.95178400 | -3.29819900 |
| H  | 4.95137200  | -1.17685400 | -3.23602600 |
| N  | 2.35828700  | -2.23378100 | -2.28793500 |
| N  | -3.44674800 | -1.73956900 | -1.63088800 |
| C  | 3.88994400  | -1.00975700 | -0.59677800 |
| C  | -4.20423000 | 0.41352200  | -0.42943000 |
| O  | 2.69716500  | -0.85932700 | 0.09952500  |
| O  | -3.31702600 | 0.01346100  | 0.55701100  |
| Zn | 1.13456000  | -0.89864400 | -0.99757200 |
| Zn | -1.85454900 | -1.08569600 | -0.13485100 |
| C  | -0.81638800 | 1.34235200  | 1.75759100  |
| C  | -0.08854700 | 1.40560300  | 0.50761800  |
| C  | -0.77897200 | 2.52456900  | 2.57665600  |
| C  | 0.82374300  | 2.42579400  | 0.27221400  |
| C  | 0.10635400  | 3.52924200  | 2.34573200  |
| H  | -1.43380800 | 2.57175800  | 3.44084000  |



|   |             |             |             |
|---|-------------|-------------|-------------|
| C | 0.98679000  | 3.47720100  | 1.20241000  |
| H | 1.41377500  | 2.37678800  | -0.63150400 |
| H | 0.14115300  | 4.37548900  | 3.01672600  |
| O | -0.24823000 | 0.40834900  | -0.33910300 |
| N | 1.93685800  | 4.43295900  | 1.02755800  |
| C | 2.69778900  | 4.50614100  | -0.22363100 |
| H | 3.56191900  | 5.14881200  | -0.04075600 |
| H | 3.09667600  | 3.51531000  | -0.45427100 |
| C | 2.20141600  | 5.45304000  | 2.04376500  |
| H | 2.07709700  | 5.00214800  | 3.03100000  |
| H | 3.25992000  | 5.71727700  | 1.96329500  |
| N | -0.72151000 | -0.77810900 | 3.39899400  |
| C | 0.18383500  | -0.05069100 | 2.66479800  |
| H | 0.58228500  | -0.54261600 | 1.77423700  |
| C | 1.23937900  | 0.67163800  | 3.42239800  |
| C | 1.05443900  | 1.04029900  | 4.76125000  |
| C | 2.42225800  | 1.03251000  | 2.76359700  |
| C | 2.02791100  | 1.78342000  | 5.42253700  |
| H | 0.14414800  | 0.72963600  | 5.26242100  |
| C | 3.39627800  | 1.77841800  | 3.43063300  |
| H | 2.58032200  | 0.71007900  | 1.73946300  |
| C | 3.19851700  | 2.16438500  | 4.75635900  |
| H | 1.87947400  | 2.06548600  | 6.46107100  |
| H | 4.31244300  | 2.04696900  | 2.91206200  |
| H | 3.95708000  | 2.74242600  | 5.27668700  |
| C | -2.19515500 | -5.66179400 | 0.33377000  |
| C | -2.83942800 | -6.14054700 | 1.47962600  |
| C | -2.90973800 | -5.35062500 | 2.62970900  |
| C | -2.34080300 | -4.08024000 | 2.60696500  |
| C | -1.72138800 | -3.56888500 | 1.44105600  |
| C | -1.63562900 | -4.38383400 | 0.30586600  |
| H | -2.12371100 | -6.28836100 | -0.55013800 |
| H | -3.27357000 | -7.13524500 | 1.48461200  |
| H | -3.38789900 | -5.72479400 | 3.52923600  |
| H | -1.13246800 | -4.02453800 | -0.58094800 |
| S | -2.20374400 | -2.91309400 | 3.91021600  |
| N | -1.22008600 | -2.26846400 | 1.54571700  |
| C | -1.27852900 | -1.81866500 | 2.82614800  |
| H | -1.17490400 | -5.39374100 | -5.31325500 |
| C | 1.33997700  | 6.71024800  | 1.89740900  |
| H | 0.27530900  | 6.46542900  | 1.94744600  |
| H | 1.56764100  | 7.42272200  | 2.69674300  |
| H | 1.52627200  | 7.20373700  | 0.93945400  |
| C | 1.88225200  | 5.04956400  | -1.39955300 |

|    |             |             |             |
|----|-------------|-------------|-------------|
| H  | 1.00589400  | 4.43043700  | -1.60126900 |
| H  | 1.53180200  | 6.06496700  | -1.19516900 |
| H  | 2.49846100  | 5.07648500  | -2.30163600 |
| C  | 4.24588300  | 0.34710600  | -1.25852900 |
| C  | 5.32773200  | 1.12846600  | -0.83679200 |
| C  | 3.42529600  | 0.88461500  | -2.26409100 |
| C  | 5.60903400  | 2.36856100  | -1.41400600 |
| H  | 5.97459100  | 0.76603400  | -0.04790300 |
| C  | 3.68767900  | 2.11478300  | -2.86168400 |
| H  | 2.56482200  | 0.33132400  | -2.62789000 |
| C  | 4.79526500  | 2.84709100  | -2.43484200 |
| H  | 6.45632900  | 2.95388100  | -1.07476700 |
| H  | 3.04565600  | 2.49971100  | -3.64582500 |
| C  | 5.00548300  | -1.45943100 | 0.35325300  |
| C  | 6.27363200  | -1.81506500 | -0.12606600 |
| C  | 4.75515000  | -1.54676500 | 1.72340200  |
| C  | 7.27709500  | -2.24059000 | 0.74184000  |
| H  | 6.49434400  | -1.74583900 | -1.18742700 |
| C  | 5.74986700  | -1.96632300 | 2.60765800  |
| H  | 3.77118100  | -1.28222800 | 2.08742200  |
| C  | 7.00324100  | -2.30930100 | 2.10774200  |
| H  | 8.25825600  | -2.51235100 | 0.36930200  |
| H  | 5.55268500  | -2.02645400 | 3.67203300  |
| C  | -5.50883400 | 0.93067000  | 0.19572500  |
| C  | -5.73208900 | 0.74775000  | 1.56175500  |
| C  | -6.49824200 | 1.55010900  | -0.57607700 |
| C  | -6.92277100 | 1.16865400  | 2.15434400  |
| H  | -4.95094800 | 0.27521500  | 2.14551700  |
| C  | -7.69530700 | 1.97362300  | -0.00219700 |
| H  | -6.32932200 | 1.72429900  | -1.63478900 |
| C  | -7.89527100 | 1.77551500  | 1.36335700  |
| H  | -7.09598600 | 1.02881300  | 3.21564400  |
| H  | -8.46039700 | 2.45700400  | -0.59922700 |
| C  | -3.57089200 | 1.54539200  | -1.26601800 |
| C  | -3.59538800 | 1.63243700  | -2.66045200 |
| C  | -2.90321200 | 2.55423700  | -0.55734500 |
| C  | -2.92774600 | 2.65930800  | -3.33730100 |
| H  | -4.13263600 | 0.89976300  | -3.25126300 |
| C  | -2.23697800 | 3.58594300  | -1.20657600 |
| H  | -2.89711600 | 2.50795100  | 0.52371500  |
| C  | -2.24302100 | 3.61905300  | -2.60166600 |
| H  | -2.94036300 | 2.70840300  | -4.42038100 |
| H  | -1.70871800 | 4.34533900  | -0.64183500 |
| Cl | -9.40250000 | 2.31119100  | 2.09997100  |

|           |             |             |             |
|-----------|-------------|-------------|-------------|
| Cl        | -1.37238700 | 4.89967700  | -3.44243200 |
| Cl        | 8.26552600  | -2.83730000 | 3.21245600  |
| Cl        | 5.15574100  | 4.39609300  | -3.18048200 |
| H         | -1.77197300 | 0.82864300  | 1.69803900  |
| <b>5c</b> |             |             |             |
| C         | -1.08873600 | -5.31229300 | -3.25759000 |
| C         | -2.00609700 | -4.26208000 | -3.27969600 |
| C         | -1.81689900 | -3.12025100 | -2.49928100 |
| C         | -0.70909900 | -3.04674500 | -1.62495500 |
| C         | 0.29118400  | -4.04172300 | -1.70799200 |
| C         | 0.07550100  | -5.16928700 | -2.50328400 |
| H         | -2.87382900 | -4.31204300 | -3.93289200 |
| H         | 0.85008000  | -5.93105300 | -2.55077600 |
| O         | -0.57845800 | -2.01136400 | -0.79069100 |
| C         | -2.72167100 | -1.92498100 | -2.62431200 |
| H         | -3.39835100 | -2.05801800 | -3.48381300 |
| H         | -2.12488500 | -1.02491700 | -2.80567300 |
| C         | 1.65050900  | -3.74108200 | -1.13766900 |
| H         | 1.64648100  | -3.61902600 | -0.04804300 |
| H         | 2.34229400  | -4.56797100 | -1.36119400 |
| C         | -4.61742300 | -0.71706500 | -1.38422300 |
| C         | -4.46503500 | -2.81445300 | -1.09504500 |
| C         | -5.52961800 | -1.76765000 | -0.72077800 |
| H         | -4.94649500 | -0.47167700 | -2.40015800 |
| H         | -4.72007000 | -3.36620800 | -2.00848200 |
| H         | -4.13214700 | -3.52063300 | -0.33570800 |
| H         | -6.52029000 | -1.89667200 | -1.15686300 |
| H         | -5.61599500 | -1.59872100 | 0.35123200  |
| C         | 3.59221700  | -2.19018800 | -1.61440200 |
| C         | 2.26237600  | -2.54688900 | -3.24246800 |
| C         | 3.77417900  | -2.25485100 | -3.14891000 |
| H         | 4.09968800  | -2.99025000 | -1.06662200 |
| H         | 2.00366400  | -3.53078600 | -3.63979100 |
| H         | 1.65679300  | -1.79597100 | -3.75592200 |
| H         | 4.41335200  | -3.06795000 | -3.49748600 |
| H         | 4.09530000  | -1.32137800 | -3.61185600 |
| N         | 2.12908300  | -2.47408000 | -1.74762100 |
| N         | -3.49348000 | -1.71943100 | -1.39358900 |
| C         | 3.87388300  | -0.85129400 | -0.84575900 |
| C         | -4.29907000 | 0.54089300  | -0.52787200 |
| O         | 2.98182300  | -0.77869200 | 0.21342200  |
| O         | -3.68523700 | 0.12830600  | 0.64962800  |
| Zn        | 1.10631500  | -1.04593600 | -0.15056600 |

|    |             |             |            |
|----|-------------|-------------|------------|
| Zn | -2.06036600 | -0.85980600 | 0.17771600 |
| C  | -1.12488800 | 1.49507400  | 2.18274100 |
| C  | -0.20385400 | 1.32640100  | 1.13124500 |
| C  | -0.93712400 | 2.55391300  | 3.07078100 |
| C  | 0.88918700  | 2.18905000  | 1.00909800 |
| C  | 0.16221000  | 3.39397500  | 2.98362000 |
| H  | -1.66246300 | 2.71796900  | 3.86335000 |
| C  | 1.12475100  | 3.20914800  | 1.95431200 |
| H  | 1.56550900  | 2.02031200  | 0.18244900 |
| H  | 0.27502900  | 4.18741700  | 3.70862300 |
| O  | -0.35512900 | 0.31531100  | 0.25049400 |
| N  | 2.26856200  | 3.98412400  | 1.90220400 |
| C  | 3.15886100  | 3.91925300  | 0.74770000 |
| H  | 4.11534300  | 4.35317400  | 1.05577000 |
| H  | 3.36462900  | 2.87019900  | 0.50871300 |
| C  | 2.49645400  | 5.04093400  | 2.87776200 |
| H  | 2.25130300  | 4.65610900  | 3.87293900 |
| H  | 3.57224800  | 5.24317200  | 2.89066900 |
| N  | 0.62865200  | -1.55850600 | 2.27946900 |
| C  | 0.56554000  | -0.68440500 | 3.25541000 |
| H  | -0.30059900 | -0.72295900 | 3.92095700 |
| C  | 1.59424300  | 0.25739900  | 3.64171200 |
| C  | 2.77107000  | 0.46163500  | 2.89880900 |
| C  | 1.39406800  | 0.98522300  | 4.82793900 |
| C  | 3.73122900  | 1.35440300  | 3.35582200 |
| H  | 2.91210900  | -0.05769900 | 1.95693800 |
| C  | 2.36355500  | 1.87422800  | 5.28426200 |
| H  | 0.47308700  | 0.85043900  | 5.38733800 |
| C  | 3.53583800  | 2.05716600  | 4.54925300 |
| H  | 4.63442400  | 1.50724900  | 2.77304200 |
| H  | 2.20165500  | 2.42658300  | 6.20441800 |
| H  | 4.29200300  | 2.75303600  | 4.90083600 |
| C  | -4.68536300 | -4.24944200 | 2.24602800 |
| C  | -4.03998300 | -5.49652700 | 2.27510400 |
| C  | -2.64867800 | -5.59096200 | 2.25956700 |
| C  | -1.91358500 | -4.40686000 | 2.20708500 |
| C  | -2.55960000 | -3.15221600 | 2.14462100 |
| C  | -3.95400100 | -3.06828500 | 2.17533100 |
| H  | -5.76945700 | -4.20698200 | 2.27069500 |
| H  | -4.63165500 | -6.40518900 | 2.32014800 |
| H  | -2.15630400 | -6.55652200 | 2.29780700 |
| H  | -4.41691600 | -2.08868700 | 2.13070600 |
| S  | -0.17292100 | -4.16198700 | 2.26642300 |
| N  | -1.70334900 | -2.05387500 | 2.09095100 |

|   |             |             |             |
|---|-------------|-------------|-------------|
| C | -0.44908200 | -2.41605100 | 2.20611400  |
| H | -1.24942300 | -6.19884600 | -3.86183800 |
| C | 1.73272500  | 6.34486600  | 2.61107500  |
| H | 0.65805900  | 6.15984900  | 2.53345000  |
| H | 1.90070100  | 7.06009900  | 3.42379600  |
| H | 2.06074000  | 6.80973300  | 1.67761000  |
| C | 2.63126300  | 4.65117900  | -0.49035000 |
| H | 1.69811600  | 4.20900300  | -0.84610100 |
| H | 2.44306700  | 5.70544900  | -0.27014200 |
| H | 3.35638200  | 4.59696100  | -1.30498400 |
| C | 3.70127800  | 0.40247600  | -1.74190100 |
| C | 4.70528400  | 1.36405800  | -1.90461900 |
| C | 2.46988400  | 0.65438700  | -2.37198700 |
| C | 4.51518700  | 2.49890600  | -2.69520500 |
| H | 5.66249100  | 1.23211300  | -1.41678700 |
| C | 2.25323800  | 1.78264400  | -3.15833200 |
| H | 1.65132100  | -0.05194100 | -2.28758000 |
| C | 3.29287800  | 2.69539900  | -3.32810700 |
| H | 5.31179500  | 3.22472500  | -2.81541300 |
| H | 1.29193500  | 1.95545600  | -3.62665000 |
| C | 5.31522300  | -0.97919800 | -0.33677700 |
| C | 6.38517300  | -1.16516500 | -1.22476000 |
| C | 5.58173000  | -0.98798600 | 1.03320200  |
| C | 7.68906400  | -1.33085300 | -0.76266300 |
| H | 6.20724900  | -1.16618100 | -2.29550100 |
| C | 6.88154200  | -1.14977500 | 1.51553100  |
| H | 4.75686500  | -0.88350100 | 1.72354100  |
| C | 7.92619100  | -1.31647500 | 0.61123700  |
| H | 8.51163400  | -1.46778800 | -1.45551000 |
| H | 7.07961100  | -1.15194400 | 2.58165800  |
| C | -5.63870500 | 1.22617200  | -0.23496500 |
| C | -6.14621100 | 1.22027800  | 1.06523100  |
| C | -6.38728400 | 1.83204900  | -1.25062900 |
| C | -7.38250000 | 1.79841800  | 1.35465300  |
| H | -5.54406200 | 0.76351600  | 1.84158400  |
| C | -7.62575100 | 2.41081200  | -0.98188200 |
| H | -5.99336700 | 1.87260800  | -2.26201500 |
| C | -8.11321800 | 2.38454300  | 0.32428700  |
| H | -7.77548400 | 1.79763600  | 2.36541200  |
| H | -8.20372200 | 2.88287500  | -1.76835300 |
| C | -3.37203600 | 1.52981500  | -1.26746400 |
| C | -3.08215100 | 1.49799900  | -2.63503700 |
| C | -2.74368300 | 2.50639500  | -0.48203800 |
| C | -2.15749700 | 2.38287100  | -3.19995300 |

|    |             |             |             |
|----|-------------|-------------|-------------|
| H  | -3.56576600 | 0.78175400  | -3.28915200 |
| C  | -1.82333700 | 3.39563000  | -1.02167700 |
| H  | -2.95437500 | 2.53009100  | 0.57871300  |
| C  | -1.52938600 | 3.31693100  | -2.38313400 |
| H  | -1.93094000 | 2.34550800  | -4.25983800 |
| H  | -1.31996600 | 4.11954800  | -0.39190400 |
| Cl | -9.67666000 | 3.11447600  | 0.67617100  |
| Cl | -0.33895200 | 4.40854200  | -3.07729300 |
| Cl | 9.56941500  | -1.51748500 | 1.20664400  |
| Cl | 3.06051200  | 4.11311900  | -4.33563900 |
| H  | -2.00948800 | 0.87283000  | 2.23377100  |

**TS-6c**

|   |             |             |             |
|---|-------------|-------------|-------------|
| C | -1.10312600 | -5.11288700 | -3.62567100 |
| C | -2.04486200 | -4.09030900 | -3.51447300 |
| C | -1.85964200 | -3.02942300 | -2.62646500 |
| C | -0.72984500 | -3.02040000 | -1.77385900 |
| C | 0.29356200  | -3.97319100 | -1.98951300 |
| C | 0.08013700  | -5.01575700 | -2.89407800 |
| H | -2.92801200 | -4.09404600 | -4.14880100 |
| H | 0.87062600  | -5.74763800 | -3.04267700 |
| O | -0.60230100 | -2.07808100 | -0.83942300 |
| C | -2.77332000 | -1.83227800 | -2.64712300 |
| H | -3.47334200 | -1.91709000 | -3.49343800 |
| H | -2.18277500 | -0.92122000 | -2.79546300 |
| C | 1.66155300  | -3.72149200 | -1.41051300 |
| H | 1.67912200  | -3.77452700 | -0.31550700 |
| H | 2.36317200  | -4.48733100 | -1.77529500 |
| C | -4.61115400 | -0.64472200 | -1.30398000 |
| C | -4.51459400 | -2.75571500 | -1.10916200 |
| C | -5.50924700 | -1.69016800 | -0.61280800 |
| H | -4.98823600 | -0.38197500 | -2.29890900 |
| H | -4.83991500 | -3.23362300 | -2.04201500 |
| H | -4.17144000 | -3.52072600 | -0.41363800 |
| H | -6.53750800 | -1.76484100 | -0.96615900 |
| H | -5.49413400 | -1.56385500 | 0.46924900  |
| C | 3.56927900  | -2.08033000 | -1.67220400 |
| C | 2.21405100  | -2.21018300 | -3.31192600 |
| C | 3.74355700  | -2.04171300 | -3.20862300 |
| H | 4.08328000  | -2.90180400 | -1.16475000 |
| H | 1.86603300  | -3.09213000 | -3.85293900 |
| H | 1.66962300  | -1.33697400 | -3.67689200 |
| H | 4.30840500  | -2.88354100 | -3.61422000 |
| H | 4.14523700  | -1.11127200 | -3.61142200 |

|    |             |             |             |
|----|-------------|-------------|-------------|
| N  | 2.10408700  | -2.36123500 | -1.81880300 |
| N  | -3.51897800 | -1.67873600 | -1.39146600 |
| C  | 3.84180700  | -0.77137300 | -0.83798200 |
| C  | -4.22829800 | 0.60165200  | -0.45229900 |
| O  | 2.95142300  | -0.73276600 | 0.21689600  |
| O  | -3.56033400 | 0.17902600  | 0.68717600  |
| Zn | 1.10472300  | -1.21270200 | -0.06531200 |
| Zn | -2.08520200 | -1.00097000 | 0.17294000  |
| C  | -0.79733800 | 1.02698000  | 2.29398800  |
| C  | -0.13783400 | 1.19206700  | 1.01243800  |
| C  | -0.70476600 | 2.15059700  | 3.19545000  |
| C  | 0.82159300  | 2.18548900  | 0.83670400  |
| C  | 0.22272400  | 3.12585000  | 3.02111000  |
| H  | -1.34849100 | 2.17401400  | 4.06953800  |
| C  | 1.09760700  | 3.10697700  | 1.86613300  |
| H  | 1.36279400  | 2.19415800  | -0.09694800 |
| H  | 0.30716400  | 3.91935000  | 3.74967500  |
| O  | -0.36190700 | 0.28907900  | 0.09010500  |
| N  | 2.14664300  | 3.96434300  | 1.79016700  |
| C  | 2.98512400  | 4.02157300  | 0.58625800  |
| H  | 3.94619900  | 4.44595000  | 0.88725300  |
| H  | 3.18978000  | 3.00257200  | 0.24451400  |
| C  | 2.49153300  | 4.85452000  | 2.90133600  |
| H  | 2.31733600  | 4.32395100  | 3.84053300  |
| H  | 3.56998300  | 5.02646400  | 2.84901700  |
| N  | 0.50704100  | -1.46747400 | 2.13182700  |
| C  | 0.26859500  | -0.42883700 | 3.03694200  |
| H  | -0.48022400 | -0.69219300 | 3.78610700  |
| C  | 1.44923500  | 0.23998500  | 3.65162200  |
| C  | 2.61384900  | 0.53834400  | 2.93517200  |
| C  | 1.35588900  | 0.64092200  | 4.99204200  |
| C  | 3.65069600  | 1.24331000  | 3.54904200  |
| H  | 2.71917900  | 0.21839500  | 1.90443000  |
| C  | 2.39470100  | 1.33668800  | 5.60614900  |
| H  | 0.45453200  | 0.41258900  | 5.55562000  |
| C  | 3.54632900  | 1.64992500  | 4.87984900  |
| H  | 4.54680900  | 1.46896700  | 2.97768100  |
| H  | 2.30618000  | 1.63278300  | 6.64725400  |
| H  | 4.35865300  | 2.19454900  | 5.35278200  |
| C  | -4.49115400 | -4.71378200 | 2.07537300  |
| C  | -3.71609800 | -5.87283600 | 1.92809900  |
| C  | -2.32382600 | -5.79973200 | 1.86020800  |
| C  | -1.72400400 | -4.54428300 | 1.93303600  |
| C  | -2.50125000 | -3.36807800 | 2.04557300  |

|   |             |             |             |
|---|-------------|-------------|-------------|
| C | -3.89274000 | -3.45684800 | 2.13382300  |
| H | -5.57150600 | -4.79515200 | 2.14172200  |
| H | -4.20103600 | -6.84241100 | 1.87741300  |
| H | -1.72537400 | -6.69921600 | 1.76260600  |
| H | -4.47275600 | -2.54749600 | 2.24450100  |
| S | -0.01680200 | -4.12400400 | 1.96734300  |
| N | -1.77303300 | -2.17846700 | 2.05646500  |
| C | -0.46460100 | -2.39737000 | 2.07370100  |
| H | -1.26063600 | -5.93670300 | -4.31366600 |
| C | 1.75112500  | 6.19450400  | 2.87776400  |
| H | 0.66749200  | 6.04791400  | 2.89842200  |
| H | 2.03254200  | 6.79820300  | 3.74664800  |
| H | 1.99448900  | 6.76257300  | 1.97596400  |
| C | 2.37287100  | 4.85730900  | -0.53880900 |
| H | 1.43319000  | 4.42778700  | -0.89206400 |
| H | 2.17519300  | 5.87938900  | -0.20389200 |
| H | 3.05525700  | 4.90115200  | -1.38992100 |
| C | 3.67299600  | 0.51247800  | -1.69646500 |
| C | 4.72392900  | 1.39229900  | -1.98205600 |
| C | 2.40021400  | 0.86332000  | -2.18064000 |
| C | 4.53421700  | 2.54276100  | -2.75201700 |
| H | 5.71746200  | 1.18654100  | -1.60506000 |
| C | 2.18674600  | 2.00088700  | -2.95500600 |
| H | 1.53484000  | 0.24871300  | -1.96677600 |
| C | 3.26845500  | 2.83025900  | -3.24921300 |
| H | 5.36609900  | 3.20478400  | -2.96574400 |
| H | 1.19501700  | 2.24649700  | -3.31539600 |
| C | 5.27890500  | -0.90796200 | -0.31416300 |
| C | 6.36074100  | -1.15201000 | -1.17251300 |
| C | 5.52133200  | -0.84886800 | 1.05957200  |
| C | 7.65541800  | -1.30551000 | -0.67903700 |
| H | 6.20234900  | -1.21500400 | -2.24464200 |
| C | 6.81031600  | -0.99809100 | 1.57242500  |
| H | 4.68084400  | -0.70642500 | 1.72456400  |
| C | 7.86874300  | -1.22019700 | 0.69582400  |
| H | 8.48801100  | -1.48940800 | -1.34869400 |
| H | 6.98938300  | -0.95023000 | 2.64090200  |
| C | -5.54952300 | 1.29294700  | -0.08545900 |
| C | -5.99745700 | 1.25613900  | 1.23608700  |
| C | -6.33818700 | 1.93092800  | -1.04968000 |
| C | -7.21343600 | 1.83682900  | 1.59698700  |
| H | -5.36580700 | 0.77038900  | 1.97036900  |
| C | -7.55733400 | 2.51328600  | -0.70901500 |
| H | -5.99212100 | 1.99407500  | -2.07721000 |



|    |             |             |             |
|----|-------------|-------------|-------------|
| C  | -7.98437900 | 2.45732500  | 0.61710400  |
| H  | -7.56061100 | 1.81105800  | 2.62407500  |
| H  | -8.16633000 | 3.01037200  | -1.45565600 |
| C  | -3.34104400 | 1.60036700  | -1.22550600 |
| C  | -3.16658900 | 1.62328400  | -2.61176900 |
| C  | -2.64653800 | 2.54507300  | -0.45664300 |
| C  | -2.30135600 | 2.54001300  | -3.21913500 |
| H  | -3.69702100 | 0.92502600  | -3.24914900 |
| C  | -1.79318300 | 3.47269000  | -1.03934300 |
| H  | -2.76853800 | 2.51794700  | 0.61951400  |
| C  | -1.62094100 | 3.45511800  | -2.42418500 |
| H  | -2.16288800 | 2.54307400  | -4.29459300 |
| H  | -1.25300600 | 4.18824100  | -0.43072900 |
| Cl | -9.52189100 | 3.19259700  | 1.05975900  |
| Cl | -0.51805900 | 4.60284000  | -3.17373500 |
| Cl | 9.50011500  | -1.40545300 | 1.32966000  |
| Cl | 3.03347600  | 4.25833000  | -4.24547000 |
| H  | -1.75958000 | 0.52507500  | 2.25569900  |

**5d**

|   |             |             |             |
|---|-------------|-------------|-------------|
| C | -0.27894400 | 2.13136600  | -4.83194400 |
| C | 0.97107700  | 1.56630700  | -4.56829700 |
| C | 1.13754200  | 0.68111900  | -3.50832800 |
| C | 0.04503300  | 0.36681500  | -2.66207500 |
| C | -1.24694000 | 0.84925100  | -2.98805600 |
| C | -1.37339500 | 1.73645400  | -4.06426100 |
| H | 1.82487200  | 1.80848300  | -5.19635300 |
| H | -2.36316400 | 2.11476400  | -4.30863100 |
| O | 0.30698000  | -0.38850000 | -1.58867300 |
| C | 2.42879600  | -0.04918600 | -3.26397000 |
| H | 3.13026900  | 0.13466100  | -4.09058500 |
| H | 2.20313800  | -1.11800700 | -3.24804600 |
| C | -2.49935300 | 0.41495400  | -2.24780700 |
| H | -2.66209900 | 0.99567600  | -1.33487400 |
| H | -3.37078900 | 0.59874600  | -2.89633100 |
| C | 4.08451400  | -0.81503700 | -1.52618900 |
| C | 4.20066300  | 1.25119700  | -1.96917700 |
| C | 5.05123200  | 0.30701100  | -1.09821500 |
| H | 4.47194300  | -1.37274800 | -2.38742600 |
| H | 4.61442000  | 1.39169700  | -2.97603500 |
| H | 3.91901000  | 2.22445300  | -1.56334500 |
| H | 6.10041900  | 0.18577200  | -1.36651700 |
| H | 4.95568300  | 0.51418900  | -0.03158200 |
| C | -3.63279600 | -1.72603500 | -1.34350400 |

|    |             |             |             |
|----|-------------|-------------|-------------|
| C  | -2.26576500 | -1.99829600 | -2.95590100 |
| C  | -3.26238000 | -2.92771600 | -2.23568200 |
| H  | -4.56875800 | -1.24797500 | -1.65019400 |
| H  | -2.63833300 | -1.60991700 | -3.91146200 |
| H  | -1.23732700 | -2.34566900 | -3.08417800 |
| H  | -4.06426100 | -3.34916800 | -2.84125700 |
| H  | -2.77462000 | -3.71629300 | -1.66685600 |
| N  | -2.43122400 | -0.99551800 | -1.86370500 |
| N  | 3.10153500  | 0.23664900  | -1.97699000 |
| C  | -3.55598900 | -1.97852500 | 0.19473600  |
| C  | 3.55552000  | -1.75195300 | -0.39804300 |
| O  | -2.27376600 | -2.41646200 | 0.52123500  |
| O  | 2.98276100  | -0.97325100 | 0.58394300  |
| Zn | -0.99395300 | -1.16885200 | -0.22718400 |
| Zn | 1.71105600  | 0.29883600  | -0.16538200 |
| C  | -0.47197400 | 1.48995100  | 2.90584900  |
| C  | -0.52849200 | 1.20509600  | 1.53562600  |
| C  | -0.93576000 | 2.72701900  | 3.34693700  |
| C  | -1.07712600 | 2.14126900  | 0.64901300  |
| C  | -1.45568000 | 3.67498300  | 2.47182600  |
| H  | -0.90531700 | 2.96098200  | 4.40762400  |
| C  | -1.53158000 | 3.40426800  | 1.08633000  |
| H  | -1.05945200 | 1.90020700  | -0.40385600 |
| H  | -1.81466500 | 4.61130600  | 2.87357100  |
| O  | 0.01131500  | 0.04584900  | 1.06125300  |
| N  | -1.97440800 | 4.37037300  | 0.18840900  |
| C  | -2.31966300 | 4.04624400  | -1.18769600 |
| H  | -2.15244600 | 4.94678700  | -1.78672100 |
| H  | -1.61976500 | 3.30605200  | -1.57735500 |
| C  | -2.29813700 | 5.71251200  | 0.65402500  |
| H  | -1.53058700 | 6.02034100  | 1.37130900  |
| H  | -2.18917700 | 6.38496100  | -0.20242400 |
| N  | 2.21672900  | 2.31296000  | 0.66089600  |
| C  | 3.00195700  | 2.50730300  | 1.68411700  |
| H  | 3.35296400  | 3.52803100  | 1.85212600  |
| C  | 3.44691200  | 1.52154200  | 2.64537900  |
| C  | 2.73371700  | 0.34516400  | 2.94081100  |
| C  | 4.62824100  | 1.81287800  | 3.35991900  |
| C  | 3.20786500  | -0.52012700 | 3.92090800  |
| H  | 1.80982600  | 0.11850700  | 2.42952900  |
| C  | 5.11295100  | 0.92747500  | 4.31342900  |
| H  | 5.16472600  | 2.73361400  | 3.14753400  |
| C  | 4.39656500  | -0.24056700 | 4.59774100  |
| H  | 2.65317900  | -1.42509900 | 4.14427400  |

|   |             |             |             |
|---|-------------|-------------|-------------|
| H | 6.03261500  | 1.14869800  | 4.84507300  |
| H | 4.76342400  | -0.92864400 | 5.35341700  |
| C | 0.43408000  | 7.76123200  | -0.98061100 |
| C | 0.14553000  | 7.26289800  | -2.26293600 |
| C | 0.37597400  | 5.92613400  | -2.58246300 |
| C | 0.89951400  | 5.09997100  | -1.58913000 |
| C | 1.18885800  | 5.58635800  | -0.28828000 |
| C | 0.95179600  | 6.93471600  | 0.01009600  |
| H | 0.24538100  | 8.80718900  | -0.76085200 |
| H | -0.26295300 | 7.92812200  | -3.01707600 |
| H | 0.14939400  | 5.53556900  | -3.56888600 |
| H | 1.17224900  | 7.30449200  | 1.00541000  |
| S | 1.28081700  | 3.39512700  | -1.67200000 |
| N | 1.67926300  | 4.64268900  | 0.59561400  |
| C | 1.77335000  | 3.47978000  | 0.02581300  |
| H | -0.41023100 | 2.82226800  | -5.65834500 |
| C | -3.69275500 | 5.88004700  | 1.27265900  |
| H | -3.86166700 | 5.15928100  | 2.07563000  |
| H | -3.80498600 | 6.88941200  | 1.68431700  |
| H | -4.47855600 | 5.73452100  | 0.52657700  |
| C | -3.75643400 | 3.54860400  | -1.38595300 |
| H | -3.96385000 | 2.70469300  | -0.72523800 |
| H | -4.48573700 | 4.33278500  | -1.16673500 |
| H | -3.91002700 | 3.22705800  | -2.42235700 |
| C | -4.58508400 | -3.07718700 | 0.50333500  |
| C | -5.96320000 | -2.84291200 | 0.43182300  |
| C | -4.13964700 | -4.36545300 | 0.80918700  |
| C | -6.88044200 | -3.86869100 | 0.65206400  |
| H | -6.33559500 | -1.84584100 | 0.22113700  |
| C | -5.04226300 | -5.40427400 | 1.03484100  |
| H | -3.07225300 | -4.53468700 | 0.87265800  |
| C | -6.40776100 | -5.14529100 | 0.95038400  |
| H | -7.94714400 | -3.68194000 | 0.60031500  |
| H | -4.69235400 | -6.40248000 | 1.27342800  |
| C | -3.90260300 | -0.70007600 | 0.98844200  |
| C | -4.77735700 | 0.29818100  | 0.53931200  |
| C | -3.32701200 | -0.54813300 | 2.25574000  |
| C | -5.07584600 | 1.41019000  | 1.32925200  |
| H | -5.24482900 | 0.22949300  | -0.43685500 |
| C | -3.61524900 | 0.55085500  | 3.05910500  |
| H | -2.63299600 | -1.30777300 | 2.59451400  |
| C | -4.49021200 | 1.52476000  | 2.58609300  |
| H | -5.75271600 | 2.17798900  | 0.97248600  |
| H | -3.15397400 | 0.66170000  | 4.03197600  |

|    |             |             |             |
|----|-------------|-------------|-------------|
| C  | 4.78875300  | -2.48425700 | 0.16260700  |
| C  | 5.31792300  | -2.04540200 | 1.38017300  |
| C  | 5.43792600  | -3.52225700 | -0.51429700 |
| C  | 6.46821600  | -2.62134000 | 1.91548900  |
| H  | 4.80257500  | -1.25139200 | 1.90223000  |
| C  | 6.59039900  | -4.11102900 | 0.00579500  |
| H  | 5.04032400  | -3.89992200 | -1.44991400 |
| C  | 7.09715900  | -3.65076000 | 1.21932700  |
| H  | 6.87041400  | -2.27746600 | 2.86215200  |
| H  | 7.08647200  | -4.91983700 | -0.51876400 |
| C  | 2.50829800  | -2.75726800 | -0.93150100 |
| C  | 2.56725000  | -3.37787700 | -2.18262500 |
| C  | 1.40640100  | -3.04190400 | -0.10903500 |
| C  | 1.55653000  | -4.24013700 | -2.61612400 |
| H  | 3.39871800  | -3.18979500 | -2.85381800 |
| C  | 0.38312000  | -3.89765600 | -0.52031100 |
| H  | 1.37260900  | -2.56939300 | 0.86757400  |
| C  | 0.47186600  | -4.49027700 | -1.78206100 |
| H  | 1.61154300  | -4.71100300 | -3.59126900 |
| H  | -0.47306700 | -4.08857700 | 0.11753700  |
| Cl | 8.55113200  | -4.38748600 | 1.88461000  |
| Cl | -0.79046800 | -5.58870200 | -2.31986300 |
| Cl | -4.87632200 | 2.91036700  | 3.59712900  |
| Cl | -7.55801500 | -6.44812900 | 1.23123100  |
| H  | -0.08189600 | 0.74984200  | 3.59403200  |

**TS-6d**

|   |             |             |            |
|---|-------------|-------------|------------|
| C | 0.42619100  | 1.95964900  | 4.98709700 |
| C | -0.88009700 | 1.61648100  | 4.63177800 |
| C | -1.13169300 | 0.83259100  | 3.51011500 |
| C | -0.06041500 | 0.41588100  | 2.68178400 |
| C | 1.27208700  | 0.66493800  | 3.09522200 |
| C | 1.48226300  | 1.44428800  | 4.24088600 |
| H | -1.71609800 | 1.94524700  | 5.24407800 |
| H | 2.50542600  | 1.63666800  | 4.55567300 |
| O | -0.37274700 | -0.20874300 | 1.53913500 |
| C | -2.50585000 | 0.27795600  | 3.23664700 |
| H | -3.19319900 | 0.58493800  | 4.03784300 |
| H | -2.41967000 | -0.81073000 | 3.28101300 |
| C | 2.48386300  | 0.09264200  | 2.38190500 |
| H | 2.77787500  | 0.68287100  | 1.50980500 |
| H | 3.34060300  | 0.12210100  | 3.07443000 |
| C | -4.15221700 | -0.42938000 | 1.47152100 |
| C | -4.15331200 | 1.65646000  | 1.84046000 |

|    |             |             |             |
|----|-------------|-------------|-------------|
| C  | -5.01967200 | 0.73733300  | 0.95698200  |
| H  | -4.61713800 | -0.92039000 | 2.33552200  |
| H  | -4.60125000 | 1.85316400  | 2.82314400  |
| H  | -3.78856900 | 2.59330600  | 1.41564400  |
| H  | -6.08694200 | 0.69187600  | 1.17156500  |
| H  | -4.85597300 | 0.90639900  | -0.10820000 |
| C  | 3.37912600  | -2.08434900 | 1.34095600  |
| C  | 2.01605400  | -2.30958100 | 2.96737100  |
| C  | 2.93149900  | -3.28472200 | 2.20114300  |
| H  | 4.35864600  | -1.69368800 | 1.63632700  |
| H  | 2.42323600  | -1.99088200 | 3.93422500  |
| H  | 0.96527800  | -2.58062300 | 3.09275100  |
| H  | 3.70803900  | -3.78167200 | 2.78185300  |
| H  | 2.38153200  | -4.01880900 | 1.61621800  |
| N  | 2.25382200  | -1.27477800 | 1.91672200  |
| N  | -3.12302100 | 0.57355900  | 1.92626300  |
| C  | 3.24283800  | -2.28425900 | -0.20063500 |
| C  | -3.64178900 | -1.45547400 | 0.41277900  |
| O  | 1.92453700  | -2.62147000 | -0.49851300 |
| O  | -2.96157000 | -0.78059700 | -0.57732000 |
| Zn | 0.78422600  | -1.26673400 | 0.28897100  |
| Zn | -1.76342000 | 0.56963500  | 0.14132400  |
| C  | 0.19882200  | 1.81414800  | -2.71335700 |
| C  | 0.62762000  | 1.20820900  | -1.46993400 |
| C  | 0.90503300  | 3.00447600  | -3.12263000 |
| C  | 1.41362000  | 1.94937800  | -0.59341800 |
| C  | 1.71143300  | 3.69972300  | -2.27886400 |
| H  | 0.73480100  | 3.38278300  | -4.12660100 |
| C  | 1.90574000  | 3.23176800  | -0.92800400 |
| H  | 1.56533800  | 1.54749300  | 0.39267700  |
| H  | 2.17198000  | 4.61665900  | -2.61270500 |
| O  | 0.08077100  | 0.06107500  | -1.12345800 |
| N  | 2.50291800  | 4.03553100  | -0.01174800 |
| C  | 2.62705200  | 3.66821500  | 1.40147600  |
| H  | 2.35259400  | 4.55022600  | 1.98754300  |
| H  | 1.88172700  | 2.91540600  | 1.64584900  |
| C  | 2.99753800  | 5.37197300  | -0.36776800 |
| H  | 2.24723500  | 5.87390600  | -0.98337800 |
| H  | 3.04373900  | 5.94489800  | 0.56067000  |
| N  | -1.75115800 | 2.44438100  | -0.79352600 |
| C  | -1.63312000 | 2.47628000  | -2.17487100 |
| H  | -1.52154800 | 3.48651400  | -2.55960500 |
| C  | -2.57546200 | 1.65514700  | -3.00112300 |
| C  | -2.48026100 | 0.27072000  | -3.17883300 |

|   |             |             |             |
|---|-------------|-------------|-------------|
| C | -3.61160200 | 2.35347500  | -3.63993200 |
| C | -3.40045700 | -0.39759500 | -3.98490700 |
| H | -1.69415200 | -0.28374300 | -2.68353800 |
| C | -4.54272300 | 1.68071000  | -4.43003000 |
| H | -3.68684000 | 3.42986200  | -3.51094500 |
| C | -4.43427200 | 0.30082800  | -4.61010800 |
| H | -3.31533100 | -1.47234300 | -4.10983200 |
| H | -5.34102300 | 2.23544600  | -4.91383000 |
| H | -5.14821400 | -0.22600600 | -5.23637400 |
| C | 0.31737700  | 7.76928300  | 0.90331900  |
| C | 0.41969700  | 7.29546500  | 2.21885000  |
| C | 0.00309500  | 6.00109100  | 2.54296600  |
| C | -0.50264800 | 5.19735500  | 1.52538700  |
| C | -0.60546800 | 5.65857300  | 0.18472400  |
| C | -0.19286800 | 6.96449100  | -0.11404200 |
| H | 0.64015200  | 8.78012600  | 0.67299500  |
| H | 0.81970000  | 7.93902400  | 2.99603200  |
| H | 0.07691900  | 5.62926400  | 3.56005800  |
| H | -0.27777200 | 7.32400900  | -1.13418800 |
| S | -1.05559000 | 3.53482800  | 1.60541700  |
| N | -1.08878600 | 4.74417400  | -0.72604200 |
| C | -1.33698600 | 3.58797200  | -0.16873900 |
| H | 0.61873700  | 2.56981400  | 5.86332400  |
| C | 4.36405300  | 5.36596600  | -1.05590100 |
| H | 4.34940800  | 4.77643700  | -1.97492100 |
| H | 4.65877500  | 6.39002400  | -1.30705400 |
| H | 5.13249200  | 4.94194500  | -0.40402700 |
| C | 4.02885400  | 3.19030200  | 1.78209800  |
| H | 4.33555200  | 2.35148000  | 1.15267300  |
| H | 4.76894000  | 3.98760900  | 1.67050000  |
| H | 4.04043000  | 2.86616400  | 2.82731400  |
| C | 4.18744000  | -3.43652400 | -0.57360600 |
| C | 5.57855400  | -3.30433300 | -0.49190600 |
| C | 3.65097500  | -4.66675900 | -0.95899000 |
| C | 6.42086500  | -4.37650000 | -0.77837600 |
| H | 6.02005800  | -2.35088100 | -0.21956500 |
| C | 4.47835000  | -5.75059600 | -1.25244500 |
| H | 2.57416800  | -4.75410500 | -1.03106000 |
| C | 5.85867900  | -5.59519000 | -1.15527100 |
| H | 7.49806100  | -4.27031700 | -0.71753700 |
| H | 4.05914800  | -6.70435200 | -1.55295500 |
| C | 3.65049300  | -1.01772400 | -0.98731200 |
| C | 4.56283700  | -0.05620800 | -0.53733000 |
| C | 3.08726000  | -0.84625100 | -2.25951200 |

|    |             |             |             |
|----|-------------|-------------|-------------|
| C  | 4.91700000  | 1.03795900  | -1.33231000 |
| H  | 5.02456600  | -0.14593800 | 0.44013500  |
| C  | 3.42888500  | 0.23364900  | -3.06693000 |
| H  | 2.36082500  | -1.57598200 | -2.59587500 |
| C  | 4.35115700  | 1.16658300  | -2.59591900 |
| H  | 5.62957900  | 1.77382300  | -0.97739100 |
| H  | 2.98795100  | 0.35429800  | -4.04961200 |
| C  | -4.90656900 | -2.11588100 | -0.17131300 |
| C  | -5.36902400 | -1.65956900 | -1.40935600 |
| C  | -5.64370800 | -3.09725000 | 0.49954400  |
| C  | -6.53904000 | -2.16513200 | -1.97196800 |
| H  | -4.78644300 | -0.90894000 | -1.92563400 |
| C  | -6.81733300 | -3.61554500 | -0.04825700 |
| H  | -5.30104100 | -3.48680000 | 1.45188000  |
| C  | -7.25548200 | -3.14064800 | -1.28247000 |
| H  | -6.88912500 | -1.80773500 | -2.93421400 |
| H  | -7.38194700 | -4.38163600 | 0.47115300  |
| C  | -2.71229700 | -2.52228100 | 1.03493300  |
| C  | -2.87281500 | -3.08043700 | 2.30625200  |
| C  | -1.62255500 | -2.95577800 | 0.26209600  |
| C  | -1.97310000 | -4.02649900 | 2.80607200  |
| H  | -3.70116100 | -2.78094400 | 2.93962900  |
| C  | -0.71306500 | -3.90256700 | 0.73707500  |
| H  | -1.52207300 | -2.53813300 | -0.73566300 |
| C  | -0.90044900 | -4.42876400 | 2.01745800  |
| H  | -2.10613500 | -4.44647400 | 3.79686400  |
| H  | 0.13251400  | -4.20858700 | 0.13154000  |
| Cl | -8.73472500 | -3.79041600 | -1.98278800 |
| Cl | 0.22280700  | -5.63021300 | 2.63933200  |
| Cl | 4.82035400  | 2.51367700  | -3.62445600 |
| Cl | 6.91358200  | -6.95523600 | -1.52047900 |
| H  | -0.10778900 | 1.12966900  | -3.49468300 |

7

|   |             |             |             |
|---|-------------|-------------|-------------|
| C | 0.20436400  | -6.36239600 | -1.61324600 |
| C | 1.35901500  | -5.65864200 | -1.28408900 |
| C | 1.35412700  | -4.26851000 | -1.13757100 |
| C | 0.15521500  | -3.54761500 | -1.34786100 |
| C | -1.01916800 | -4.26237400 | -1.67012900 |
| C | -0.97937700 | -5.65201100 | -1.79704400 |
| H | 2.29245000  | -6.19279100 | -1.12624800 |
| H | -1.89620600 | -6.17803200 | -2.05045500 |
| O | 0.10076600  | -2.20598400 | -1.24083800 |
| C | 2.62548900  | -3.56641000 | -0.74827800 |

|    |             |             |             |
|----|-------------|-------------|-------------|
| H  | 3.44498700  | -4.29631500 | -0.67576300 |
| H  | 2.52746500  | -3.09289800 | 0.23682700  |
| C  | -2.31364000 | -3.52346500 | -1.83132400 |
| H  | -2.22778400 | -2.70346800 | -2.55286400 |
| H  | -3.08335900 | -4.21111000 | -2.21404400 |
| C  | 4.31953200  | -1.89141200 | -1.69251200 |
| C  | 3.15950100  | -2.88038500 | -3.15123900 |
| C  | 4.26321600  | -1.80150000 | -3.23083600 |
| H  | 5.07882600  | -2.61640500 | -1.37818700 |
| H  | 3.55476500  | -3.89873500 | -3.25595500 |
| H  | 2.26493200  | -2.77805000 | -3.77142800 |
| H  | 5.17331200  | -2.04848300 | -3.77621700 |
| H  | 3.88145800  | -0.83453900 | -3.56389300 |
| C  | -4.17977300 | -2.42982600 | -0.62276700 |
| C  | -3.16024300 | -3.94448800 | 0.48397500  |
| C  | -4.59822500 | -3.38232100 | 0.52330900  |
| H  | -4.62195000 | -2.71797800 | -1.58140600 |
| H  | -3.08058600 | -4.96873700 | 0.10920400  |
| H  | -2.57323700 | -3.86408600 | 1.40220900  |
| H  | -5.38013100 | -4.09666000 | 0.26062100  |
| H  | -4.86733700 | -2.88289400 | 1.45329100  |
| N  | -2.76344400 | -2.92937700 | -0.55188700 |
| N  | 2.96560900  | -2.51737400 | -1.71988200 |
| C  | -4.28421000 | -0.87147500 | -0.53148100 |
| C  | 4.36483900  | -0.59609000 | -0.83794700 |
| O  | -3.18582600 | -0.35031000 | -1.22473900 |
| O  | 3.21909000  | 0.14571100  | -1.09042400 |
| Zn | -1.46024000 | -0.99095100 | -0.55195100 |
| Zn | 1.57781600  | -0.85504700 | -1.30807400 |
| C  | -1.13215000 | 2.53134300  | -1.31956000 |
| C  | 0.14308300  | 1.75611800  | -1.37808100 |
| C  | -0.93893600 | 4.00120300  | -1.37113700 |
| C  | 1.34425300  | 2.38154100  | -1.08008500 |
| C  | 0.24144600  | 4.59094900  | -1.12478000 |
| H  | -1.82295300 | 4.60751600  | -1.53354200 |
| C  | 1.41561800  | 3.77049200  | -0.84947600 |
| H  | 2.22667200  | 1.76493600  | -0.99647500 |
| H  | 0.31441800  | 5.66933800  | -1.11887400 |
| O  | 0.05110100  | 0.47661700  | -1.61675700 |
| N  | 2.54552000  | 4.35274600  | -0.40304500 |
| C  | 3.70576200  | 3.57084800  | 0.05728100  |
| H  | 3.76648100  | 2.63151400  | -0.48713000 |
| H  | 4.60443800  | 4.13945900  | -0.20097000 |
| C  | 2.66264700  | 5.80436100  | -0.20654900 |



|   |             |             |             |
|---|-------------|-------------|-------------|
| H | 1.73434900  | 6.19868500  | 0.21174700  |
| H | 3.42855600  | 5.96007400  | 0.55637500  |
| N | -0.99727200 | 2.12192300  | 1.18208500  |
| C | -1.88604500 | 2.13572000  | 0.05706400  |
| H | -2.33497800 | 1.16747600  | -0.17152300 |
| C | -3.04681600 | 3.08967800  | 0.27560400  |
| C | -3.09041600 | 3.94367800  | 1.37819600  |
| C | -4.11384600 | 3.08771000  | -0.63114500 |
| C | -4.19137400 | 4.77876500  | 1.57678100  |
| H | -2.26679000 | 3.91380200  | 2.08144200  |
| C | -5.21218300 | 3.92307800  | -0.43624900 |
| H | -4.10437900 | 2.39242800  | -1.46399700 |
| C | -5.25527200 | 4.77247400  | 0.67269500  |
| H | -4.22214500 | 5.42927100  | 2.44642600  |
| H | -6.04088100 | 3.89526000  | -1.13820200 |
| H | -6.11356600 | 5.41866600  | 0.83252800  |
| C | 0.65586400  | -3.36273700 | 2.91161300  |
| C | 1.16165900  | -2.79001600 | 4.08024600  |
| C | 1.09459100  | -1.40537800 | 4.26352200  |
| C | 0.53420200  | -0.61605800 | 3.26587800  |
| C | 0.01888600  | -1.18111900 | 2.07448800  |
| C | 0.07826600  | -2.57274500 | 1.91362500  |
| H | 0.70257200  | -4.43827900 | 2.76852100  |
| H | 1.61109400  | -3.41069400 | 4.84789100  |
| H | 1.48770200  | -0.95430700 | 5.16859700  |
| H | -0.31720900 | -3.03623700 | 1.02050200  |
| S | 0.36210400  | 1.13187700  | 3.21713100  |
| N | -0.51096800 | -0.27754200 | 1.15991100  |
| C | -0.50595100 | 1.01761400  | 1.62359900  |
| H | 0.22597800  | -7.44159600 | -1.72052200 |
| C | 3.04893500  | 6.53368000  | -1.49382800 |
| H | 2.28486500  | 6.40301200  | -2.26520300 |
| H | 3.16842200  | 7.60469900  | -1.30409700 |
| H | 3.99413600  | 6.14766700  | -1.88708200 |
| C | 3.63363000  | 3.31324000  | 1.56364500  |
| H | 3.65361900  | 4.24866300  | 2.13167500  |
| H | 2.71228400  | 2.78233700  | 1.81899900  |
| H | 4.48336400  | 2.70249500  | 1.87991100  |
| C | -4.29698200 | -0.33275500 | 0.92034600  |
| C | -5.09050400 | 0.76303800  | 1.28146400  |
| C | -3.40061700 | -0.81978200 | 1.88358500  |
| C | -4.97549400 | 1.37472100  | 2.52830500  |
| H | -5.79291700 | 1.17730400  | 0.57168900  |
| C | -3.26112500 | -0.22187400 | 3.13362700  |

|          |             |             |             |
|----------|-------------|-------------|-------------|
| H        | -2.76367500 | -1.66752600 | 1.67067800  |
| C        | -4.04653800 | 0.88558500  | 3.44028600  |
| H        | -5.57247700 | 2.24629500  | 2.76687700  |
| H        | -2.53469600 | -0.59833900 | 3.84446600  |
| C        | -5.58789400 | -0.50342600 | -1.24654700 |
| C        | -6.82990400 | -0.91005400 | -0.74246000 |
| C        | -5.55108000 | 0.20573300  | -2.44717400 |
| C        | -8.01294500 | -0.60518500 | -1.41212900 |
| H        | -6.87901000 | -1.45120900 | 0.19782200  |
| C        | -6.72542300 | 0.52581700  | -3.13029700 |
| H        | -4.58198300 | 0.49673200  | -2.83396500 |
| C        | -7.94752100 | 0.11702000  | -2.60341000 |
| H        | -8.97355600 | -0.91455200 | -1.01598300 |
| H        | -6.69467000 | 1.08270100  | -4.06033400 |
| C        | 5.59587100  | 0.21493600  | -1.28369100 |
| C        | 5.41463700  | 1.24350700  | -2.21636500 |
| C        | 6.89246000  | -0.04872400 | -0.82969200 |
| C        | 6.49085000  | 1.99509200  | -2.68425500 |
| H        | 4.40858300  | 1.45521300  | -2.55685700 |
| C        | 7.98217800  | 0.69194900  | -1.28742300 |
| H        | 7.06470300  | -0.82179200 | -0.09010100 |
| C        | 7.77079600  | 1.71065300  | -2.21339300 |
| H        | 6.34105600  | 2.79236300  | -3.40392000 |
| H        | 8.98263000  | 0.48774600  | -0.92309000 |
| C        | 4.44960200  | -0.94895600 | 0.66073200  |
| C        | 5.21987400  | -1.99945800 | 1.17860600  |
| C        | 3.73375800  | -0.15381400 | 1.56095400  |
| C        | 5.28639800  | -2.24028800 | 2.55135100  |
| H        | 5.78097600  | -2.65490300 | 0.52110200  |
| C        | 3.81004000  | -0.35969100 | 2.93499700  |
| H        | 3.10177700  | 0.63044100  | 1.16836200  |
| C        | 4.58592900  | -1.40811900 | 3.42035900  |
| H        | 5.87545100  | -3.06250800 | 2.94151400  |
| H        | 3.26040400  | 0.28056300  | 3.61194400  |
| Cl       | 9.13646600  | 2.65727000  | -2.78847200 |
| Cl       | 4.66817600  | -1.69879500 | 5.15085100  |
| Cl       | -9.43679800 | 0.51785800  | -3.45274200 |
| Cl       | -3.85106000 | 1.68448800  | 4.99357100  |
| H        | -1.80697800 | 2.19283400  | -2.11148900 |
| <b>8</b> |             |             |             |
| C        | 0.35916300  | -4.17616900 | 4.99777700  |
| C        | -0.82346500 | -3.86983700 | 4.33045900  |
| C        | -0.89049000 | -2.85632700 | 3.36814000  |

|    |             |             |             |
|----|-------------|-------------|-------------|
| C  | 0.27275500  | -2.09497100 | 3.09399900  |
| C  | 1.48494700  | -2.42448100 | 3.74955500  |
| C  | 1.51129800  | -3.45555000 | 4.68879600  |
| H  | -1.72404000 | -4.43992800 | 4.54481000  |
| H  | 2.44912100  | -3.68741200 | 5.18733300  |
| O  | 0.27058400  | -1.08260400 | 2.21121000  |
| C  | -2.18161200 | -2.69563200 | 2.59179000  |
| H  | -2.99035500 | -3.20396500 | 3.13996000  |
| H  | -2.09932600 | -3.19235200 | 1.61611600  |
| C  | 2.74080500  | -1.67147800 | 3.40221700  |
| H  | 2.59187900  | -0.58884900 | 3.46894400  |
| H  | 3.54180500  | -1.93673400 | 4.10742900  |
| C  | -3.88753200 | -0.90373500 | 1.82719500  |
| C  | -2.71633700 | -0.40768600 | 3.52467700  |
| C  | -3.84852300 | 0.31650400  | 2.76922700  |
| H  | -4.65876500 | -1.61989400 | 2.13082600  |
| H  | -3.07324700 | -0.96575000 | 4.39953400  |
| H  | -1.81637800 | 0.14859800  | 3.80736800  |
| H  | -4.75698200 | 0.54735800  | 3.32403700  |
| H  | -3.50202500 | 1.19737400  | 2.22874300  |
| C  | 4.51457700  | -1.29520900 | 1.66392200  |
| C  | 3.79721700  | -3.30729200 | 1.81077400  |
| C  | 5.12466900  | -2.67851600 | 1.32678000  |
| H  | 4.95556400  | -0.85287500 | 2.56215200  |
| H  | 3.87381200  | -3.86044400 | 2.75113600  |
| H  | 3.24025200  | -3.91771000 | 1.09502100  |
| H  | 6.00178500  | -2.94454200 | 1.91814700  |
| H  | 5.34809700  | -2.83353000 | 0.27192800  |
| N  | 3.19598700  | -1.94649800 | 2.01361500  |
| N  | -2.53510400 | -1.29522300 | 2.34769500  |
| C  | 4.35591700  | -0.12498100 | 0.63472800  |
| C  | -3.90231700 | -0.60247200 | 0.29763100  |
| O  | 3.20847100  | 0.58272500  | 1.02620600  |
| O  | -2.77007800 | 0.11884900  | -0.04350200 |
| Zn | 1.77070100  | -0.70384200 | 0.87061000  |
| Zn | -1.17608600 | -0.49357300 | 0.82698100  |
| C  | -0.22607400 | 2.70781200  | -0.62389200 |
| C  | -0.79630400 | 2.52679500  | 0.63000100  |
| C  | -0.81844800 | 3.69375100  | -1.42129500 |
| C  | -1.85747600 | 3.28001800  | 1.11544900  |
| C  | -1.88996900 | 4.45895600  | -0.98631800 |
| H  | -0.40356200 | 3.87653400  | -2.40695400 |
| C  | -2.43822300 | 4.28118100  | 0.30793300  |
| H  | -2.27345600 | 3.03464600  | 2.08473000  |

|   |             |             |             |
|---|-------------|-------------|-------------|
| H | -2.28529500 | 5.21911800  | -1.64672200 |
| O | -0.30488400 | 1.45325900  | 1.39780800  |
| N | -3.50681400 | 5.03643900  | 0.75305600  |
| C | -3.91611800 | 5.04697000  | 2.15100300  |
| H | -3.04003000 | 4.85735100  | 2.77910900  |
| H | -4.24161900 | 6.06501100  | 2.39588500  |
| C | -4.23342700 | 5.92770400  | -0.14156000 |
| H | -4.29722200 | 5.46655000  | -1.13210500 |
| H | -5.26372200 | 5.99417400  | 0.22495100  |
| N | 0.47557900  | 0.90417800  | -2.10590200 |
| C | 0.93982500  | 1.86026000  | -1.11331900 |
| H | 1.39232300  | 1.38205000  | -0.24063800 |
| C | 2.04733000  | 2.71840800  | -1.70895300 |
| C | 2.18241500  | 2.89410700  | -3.08765300 |
| C | 2.97235500  | 3.31696800  | -0.84800900 |
| C | 3.23245400  | 3.66042400  | -3.59821900 |
| H | 1.48422700  | 2.39110100  | -3.74674900 |
| C | 4.02733200  | 4.07257500  | -1.35596900 |
| H | 2.88727800  | 3.14246800  | 0.21878800  |
| C | 4.16101300  | 4.24662200  | -2.73622000 |
| H | 3.33279600  | 3.78752400  | -4.67264600 |
| H | 4.75700200  | 4.50505000  | -0.67772900 |
| H | 4.98636300  | 4.82889500  | -3.13544300 |
| C | 0.07375800  | -4.80118800 | -0.32003200 |
| C | -0.27917200 | -5.12207300 | -1.63064400 |
| C | -0.38899000 | -4.11315300 | -2.59106500 |
| C | -0.15791900 | -2.79268000 | -2.21840900 |
| C | 0.17936000  | -2.45360700 | -0.89247600 |
| C | 0.31038900  | -3.47380000 | 0.05480800  |
| H | 0.16760300  | -5.58252600 | 0.42772500  |
| H | -0.47449900 | -6.15141600 | -1.91117700 |
| H | -0.66380500 | -4.35524700 | -3.61193000 |
| H | 0.58752400  | -3.25472800 | 1.07691700  |
| S | -0.23123000 | -1.36476800 | -3.23187600 |
| N | 0.35264700  | -1.06377100 | -0.64509800 |
| C | 0.27203800  | -0.32097900 | -1.84849900 |
| H | 0.38382200  | -4.96773500 | 5.73902200  |
| C | -3.62693200 | 7.33160900  | -0.23926700 |
| H | -2.60146800 | 7.29096400  | -0.61608800 |
| H | -4.21807600 | 7.96282900  | -0.91076900 |
| H | -3.60285900 | 7.81231400  | 0.74391300  |
| C | -5.03962000 | 4.05785400  | 2.47612100  |
| H | -5.94077000 | 4.28480200  | 1.89921000  |
| H | -4.75126900 | 3.03519200  | 2.22773500  |

|    |             |             |             |
|----|-------------|-------------|-------------|
| H  | -5.29654800 | 4.10473800  | 3.53997200  |
| C  | 4.16761500  | -0.55215500 | -0.83916200 |
| C  | 4.46366600  | 0.37546100  | -1.84925100 |
| C  | 3.52930300  | -1.74253300 | -1.22288000 |
| C  | 4.15393800  | 0.12737200  | -3.18215700 |
| H  | 4.92213500  | 1.32119800  | -1.59009700 |
| C  | 3.20809200  | -2.00927200 | -2.55545500 |
| H  | 3.25362800  | -2.49792200 | -0.49813900 |
| C  | 3.52657700  | -1.06797100 | -3.52746400 |
| H  | 4.37426700  | 0.86884300  | -3.93985700 |
| H  | 2.70462100  | -2.93001100 | -2.82375200 |
| C  | 5.60956600  | 0.73745500  | 0.77777800  |
| C  | 6.85483100  | 0.28010000  | 0.33138000  |
| C  | 5.53072900  | 1.98375400  | 1.39958900  |
| C  | 8.00344800  | 1.05131300  | 0.49704500  |
| H  | 6.92799200  | -0.67839500 | -0.17386000 |
| C  | 6.66909000  | 2.77202000  | 1.57035600  |
| H  | 4.56034800  | 2.32431700  | 1.73822000  |
| C  | 7.89680800  | 2.29613200  | 1.11631500  |
| H  | 8.96664500  | 0.70002100  | 0.14480300  |
| H  | 6.60704500  | 3.74381700  | 2.04755100  |
| C  | -5.14766100 | 0.25840400  | 0.03685800  |
| C  | -4.97346500 | 1.59262700  | -0.34087100 |
| C  | -6.44504800 | -0.23439100 | 0.21286500  |
| C  | -6.07236300 | 2.43015500  | -0.52728400 |
| H  | -3.96294300 | 1.95508600  | -0.48295600 |
| C  | -7.55442900 | 0.59233900  | 0.03962500  |
| H  | -6.59930400 | -1.27757500 | 0.47387600  |
| C  | -7.35318900 | 1.92340300  | -0.32404100 |
| H  | -5.93622500 | 3.46465900  | -0.82144800 |
| H  | -8.56046000 | 0.21280600  | 0.17839000  |
| C  | -3.95869600 | -1.89551600 | -0.53907000 |
| C  | -4.37436300 | -3.14405000 | -0.06531700 |
| C  | -3.53040300 | -1.80115900 | -1.87015100 |
| C  | -4.33282800 | -4.27945600 | -0.88027800 |
| H  | -4.72624100 | -3.26472900 | 0.95327400  |
| C  | -3.49976200 | -2.91453200 | -2.70069600 |
| H  | -3.18421300 | -0.84172400 | -2.23426800 |
| C  | -3.88958800 | -4.15234000 | -2.19122000 |
| H  | -4.63318300 | -5.24818900 | -0.49732200 |
| H  | -3.15248400 | -2.82878000 | -3.72368700 |
| Cl | -8.74476400 | 2.98406900  | -0.52961200 |
| Cl | -3.79081700 | -5.57912800 | -3.21585000 |
| Cl | 9.33864000  | 3.28342700  | 1.32213000  |

|    |             |             |             |
|----|-------------|-------------|-------------|
| Cl | 3.12680600  | -1.38298700 | -5.20604100 |
| H  | -0.35805100 | 1.63798100  | 2.34485700  |

**3-S**

|   |             |             |             |
|---|-------------|-------------|-------------|
| C | -1.18591500 | 0.22496900  | 0.20259900  |
| C | -1.66967800 | -0.95575100 | 0.78981100  |
| C | -2.11422700 | 1.01588800  | -0.47667500 |
| C | -3.01179300 | -1.31963200 | 0.70952000  |
| C | -3.45881900 | 0.67837000  | -0.56919300 |
| H | -1.77255800 | 1.94037500  | -0.93014000 |
| C | -3.94607000 | -0.50657900 | 0.02928200  |
| H | -3.31865800 | -2.25579500 | 1.16235400  |
| H | -4.12910100 | 1.35155100  | -1.08609200 |
| O | -0.75512300 | -1.74636900 | 1.43203300  |
| N | -5.28042200 | -0.86130400 | -0.04670600 |
| C | -5.81315900 | -1.99828100 | 0.68965700  |
| H | -5.31718800 | -2.06507100 | 1.66375300  |
| H | -6.86641200 | -1.79000200 | 0.90659500  |
| C | -6.22734300 | -0.09382600 | -0.84481200 |
| H | -5.73661400 | 0.24204800  | -1.76349600 |
| H | -7.02172200 | -0.77770400 | -1.16307000 |
| N | 1.02358000  | -0.26202100 | -0.67212700 |
| C | 0.28845800  | 0.56274000  | 0.30260600  |
| H | 0.64495600  | 0.27594700  | 1.29824200  |
| C | 0.56965200  | 2.04530100  | 0.12157900  |
| C | 1.03709500  | 2.56886400  | -1.08463300 |
| C | 0.31102400  | 2.91550500  | 1.18596500  |
| C | 1.24265300  | 3.94274500  | -1.22644300 |
| H | 1.24956000  | 1.89213500  | -1.90520600 |
| C | 0.51363600  | 4.28658100  | 1.04721100  |
| H | -0.05319000 | 2.51082500  | 2.12671300  |
| C | 0.98061400  | 4.80572900  | -0.16290000 |
| H | 1.61212700  | 4.33696000  | -2.16877700 |
| H | 0.31284300  | 4.95010100  | 1.88339700  |
| H | 1.14370800  | 5.87383300  | -0.27210200 |
| C | 6.63981400  | -0.79897200 | 1.15601100  |
| C | 6.86492500  | -1.76637900 | 0.16737600  |
| C | 5.83956600  | -2.14972000 | -0.69908400 |
| C | 4.59462200  | -1.54539200 | -0.55282400 |
| C | 4.34924400  | -0.56613200 | 0.44344000  |
| C | 5.39210900  | -0.19685200 | 1.30048700  |
| H | 7.45055400  | -0.51359100 | 1.81953800  |
| H | 7.84456800  | -2.22383200 | 0.07063400  |
| H | 6.01204200  | -2.89820300 | -1.46564600 |

|   |             |             |             |
|---|-------------|-------------|-------------|
| H | 5.20708800  | 0.55362100  | 2.06147300  |
| S | 3.12121800  | -1.81068500 | -1.48471800 |
| N | 3.06245800  | -0.05186100 | 0.48157700  |
| C | 2.32144500  | -0.58976700 | -0.43792300 |
| C | -6.83607500 | 1.09480800  | -0.09337200 |
| H | -6.05785800 | 1.79157700  | 0.22920800  |
| H | -7.54411900 | 1.63602300  | -0.72980400 |
| H | -7.37146500 | 0.75457100  | 0.79882300  |
| C | -5.69530100 | -3.32550200 | -0.06805500 |
| H | -6.23894900 | -3.27648900 | -1.01674300 |
| H | -4.65073200 | -3.55530300 | -0.29574800 |
| H | -6.11148000 | -4.14950600 | 0.52126900  |
| H | -1.21141100 | -2.49324600 | 1.83952800  |
| H | 0.46732200  | -0.91493100 | -1.20247300 |

**L<sub>5</sub>**

|   |             |             |             |
|---|-------------|-------------|-------------|
| C | 0.41704700  | -3.50599000 | 0.44574100  |
| C | -0.78414900 | -4.23463700 | 0.40853400  |
| C | -0.72200000 | -5.62698000 | 0.31682400  |
| C | 0.50304000  | -6.28582900 | 0.23497200  |
| C | 1.68238000  | -5.53924100 | 0.23949400  |
| C | 1.66308300  | -4.14783700 | 0.34753200  |
| H | -1.64927300 | -6.19416100 | 0.30171600  |
| H | 2.64349100  | -6.04147200 | 0.16413000  |
| O | 0.37730500  | -2.15212700 | 0.59239700  |
| C | -2.10752100 | -3.50385800 | 0.38805500  |
| H | -2.92441600 | -4.20910300 | 0.61558200  |
| H | -2.28398700 | -3.09804100 | -0.61240700 |
| C | -3.34944300 | -1.50597500 | 1.13929500  |
| C | -2.02078800 | -2.73438100 | 2.73535600  |
| C | -3.89448900 | -1.28544000 | 2.56592900  |
| H | -4.06987500 | -2.06103900 | 0.52876700  |
| C | -2.69444700 | -1.58388500 | 3.47490800  |
| H | -0.96992000 | -2.87619700 | 3.00128900  |
| H | -2.54908900 | -3.68188200 | 2.92919700  |
| H | -4.30927000 | -0.28921800 | 2.71708600  |
| H | -4.69513400 | -2.00692800 | 2.76199800  |
| H | -2.02654600 | -0.71952600 | 3.52269000  |
| H | -2.98493700 | -1.85169300 | 4.49364000  |
| N | -2.13888900 | -2.35378200 | 1.31106300  |
| C | -3.03008200 | -0.20567900 | 0.33747200  |
| O | -2.30953100 | -0.69724200 | -0.79638100 |
| H | 0.53937300  | -7.36784900 | 0.16214600  |
| C | 2.93064500  | -3.32732200 | 0.30853400  |

|   |             |             |             |
|---|-------------|-------------|-------------|
| H | 3.80061100  | -4.00273400 | 0.39828600  |
| H | 2.96608700  | -2.64645100 | 1.16144300  |
| C | 3.82181000  | -1.29886900 | -0.84389900 |
| C | 3.32425700  | -3.27964800 | -2.12969400 |
| C | 4.46688700  | -1.18881600 | -2.23703600 |
| H | 4.61854900  | -1.42467400 | -0.09316200 |
| C | 4.61658200  | -2.65223300 | -2.66362500 |
| H | 2.51656300  | -3.19168500 | -2.87127300 |
| H | 3.42776800  | -4.34501400 | -1.90142800 |
| H | 3.79567200  | -0.66407800 | -2.92549700 |
| H | 5.41173500  | -0.64425700 | -2.20848300 |
| H | 4.74528800  | -2.77976600 | -3.74211900 |
| H | 5.48469800  | -3.09923700 | -2.16524000 |
| N | 2.99700400  | -2.51852600 | -0.90948700 |
| C | 3.03497500  | -0.03344200 | -0.35885700 |
| O | 2.43585200  | -0.33399200 | 0.90437800  |
| C | -4.30141600 | 0.50016600  | -0.15561800 |
| C | -4.13955100 | 1.66963100  | -0.91395900 |
| C | -5.60077500 | 0.03810500  | 0.06889500  |
| C | -5.22775200 | 2.34897800  | -1.44860500 |
| H | -3.14411800 | 2.06598100  | -1.08643600 |
| C | -6.70882800 | 0.71254300  | -0.45001200 |
| H | -5.78052300 | -0.85354900 | 0.65695000  |
| C | -6.51266000 | 1.86096200  | -1.20915500 |
| H | -5.08532200 | 3.24671300  | -2.03895800 |
| H | -7.71265100 | 0.34696600  | -0.26642800 |
| C | -2.17428800 | 0.76676800  | 1.15198400  |
| C | -2.75688400 | 1.69314500  | 2.02995200  |
| C | -0.78162400 | 0.72386000  | 1.06428700  |
| C | -1.97090000 | 2.51617700  | 2.83209600  |
| H | -3.83586200 | 1.79030400  | 2.07780300  |
| C | 0.02457200  | 1.53714600  | 1.86060600  |
| H | -0.31127200 | 0.06485700  | 0.35045600  |
| C | -0.58121500 | 2.42063800  | 2.74708200  |
| H | -2.42725600 | 3.22944600  | 3.50893800  |
| H | 1.10199200  | 1.45561100  | 1.78539300  |
| C | 1.91460800  | 0.45866800  | -1.29169700 |
| C | 1.53208500  | 1.80840700  | -1.27043900 |
| C | 1.14157200  | -0.42940200 | -2.05202300 |
| C | 0.43812900  | 2.27062600  | -1.99789700 |
| H | 2.08771900  | 2.51407300  | -0.66468600 |
| C | 0.05214100  | 0.01653900  | -2.80120300 |
| H | 1.37207000  | -1.48460000 | -2.01868100 |
| C | -0.29067200 | 1.36659300  | -2.76774500 |



|    |             |             |             |
|----|-------------|-------------|-------------|
| H  | 0.15275700  | 3.31578400  | -1.96468100 |
| H  | -0.53333000 | -0.68131900 | -3.38930700 |
| C  | 4.07576300  | 1.05428100  | -0.09692800 |
| C  | 4.63630900  | 1.79633000  | -1.14488800 |
| C  | 4.53582500  | 1.28338400  | 1.20305300  |
| C  | 5.63027000  | 2.74263700  | -0.90811600 |
| H  | 4.28220100  | 1.65101600  | -2.15946800 |
| C  | 5.52905000  | 2.22933800  | 1.45881500  |
| H  | 4.10301300  | 0.71785800  | 2.01832200  |
| C  | 6.07012700  | 2.95027100  | 0.39836900  |
| H  | 6.05504800  | 3.31701500  | -1.72339700 |
| H  | 5.87698200  | 2.40648000  | 2.47015800  |
| Cl | -7.89875500 | 2.71264400  | -1.86879700 |
| Cl | 0.41692800  | 3.45145500  | 3.76186600  |
| Cl | 7.32123500  | 4.14540100  | 0.70829800  |
| Cl | -1.67795100 | 1.93413900  | -3.69476800 |
| H  | 1.72428300  | -0.98958600 | 0.75569200  |
| H  | -0.57139700 | -1.91082900 | 0.83497300  |
| H  | -1.97234400 | 0.04958900  | -1.30970900 |

**Zn-L<sub>5</sub>**

|   |             |            |             |
|---|-------------|------------|-------------|
| C | -0.23665700 | 2.13311700 | -2.13492700 |
| C | 0.90431800  | 2.32466000 | -2.95225500 |
| C | 0.78845100  | 3.12438100 | -4.09510900 |
| C | -0.42238800 | 3.69718800 | -4.47412300 |
| C | -1.55453900 | 3.44837500 | -3.69990000 |
| C | -1.47963300 | 2.67277400 | -2.54243100 |
| H | 1.67308800  | 3.28580400 | -4.70639400 |
| H | -2.51611400 | 3.86354400 | -3.99167500 |
| O | -0.18636100 | 1.44928300 | -0.98072000 |
| C | 2.22240700  | 1.61389100 | -2.72173200 |
| H | 3.00067200  | 2.12732500 | -3.30474100 |
| H | 2.16340700  | 0.59309000 | -3.12694000 |
| C | 3.94152600  | 0.79961400 | -1.15384900 |
| C | 2.77143400  | 2.80668100 | -0.63969700 |
| C | 4.96783600  | 1.93946000 | -1.31716700 |
| H | 4.01462000  | 0.06570000 | -1.96113000 |
| C | 4.26100300  | 3.20259500 | -0.77301800 |
| H | 2.49300800  | 2.70863800 | 0.40925400  |
| H | 2.08454900  | 3.51473400 | -1.10409000 |
| H | 5.90770200  | 1.74532000 | -0.80387100 |
| H | 5.20369300  | 2.05928800 | -2.37967100 |
| H | 4.66362100  | 3.48970500 | 0.20014900  |
| H | 4.39292500  | 4.05113400 | -1.44908000 |

|    |             |             |             |
|----|-------------|-------------|-------------|
| N  | 2.62435800  | 1.47851200  | -1.30028300 |
| C  | 3.98225800  | -0.06080100 | 0.18291500  |
| O  | 2.75952700  | -0.69235700 | 0.36960400  |
| Zn | 1.20858200  | 0.06821800  | -0.43510500 |
| H  | -0.48448800 | 4.31585200  | -5.36284100 |
| C  | -2.71254100 | 2.37686600  | -1.73358700 |
| H  | -3.54463900 | 2.99603100  | -2.09376500 |
| H  | -2.55780000 | 2.61557100  | -0.67782900 |
| C  | -4.38185700 | 0.74751200  | -0.94643400 |
| C  | -3.44480700 | 0.50044100  | -3.16077700 |
| C  | -5.50552100 | 0.34515400  | -1.92679500 |
| H  | -4.61693400 | 1.73082200  | -0.53237400 |
| C  | -4.95427600 | 0.71905600  | -3.31298300 |
| H  | -3.18556500 | -0.55415300 | -3.28742100 |
| H  | -2.83881500 | 1.06511800  | -3.86988000 |
| H  | -5.72409800 | -0.72278200 | -1.87120000 |
| H  | -6.43378800 | 0.86760000  | -1.68766700 |
| H  | -5.38508200 | 0.12615300  | -4.12457000 |
| H  | -5.15789100 | 1.77276000  | -3.53311900 |
| N  | -3.11843800 | 0.92465900  | -1.77062900 |
| C  | -4.11819200 | -0.11099200 | 0.33922600  |
| O  | -2.95007000 | 0.39063500  | 0.92753000  |
| Zn | -1.58116000 | 0.05329100  | -0.40856000 |
| C  | -0.24050200 | -1.68161600 | -0.58710000 |
| C  | 5.06204600  | -1.15414400 | 0.05796900  |
| C  | 4.98693800  | -2.21888900 | 0.96697900  |
| C  | 6.10386600  | -1.15356400 | -0.87333100 |
| C  | 5.91837200  | -3.25044400 | 0.95401800  |
| H  | 4.17163900  | -2.22939700 | 1.68074900  |
| C  | 7.05020000  | -2.18287500 | -0.90321600 |
| H  | 6.20437700  | -0.35566000 | -1.59964800 |
| C  | 6.94929400  | -3.22220700 | 0.01336900  |
| H  | 5.85037300  | -4.07036800 | 1.66012900  |
| H  | 7.85286800  | -2.17480600 | -1.63193100 |
| C  | 4.33088200  | 0.80682400  | 1.41682800  |
| C  | 5.64166600  | 1.21059600  | 1.70475800  |
| C  | 3.31961400  | 1.19235500  | 2.30138400  |
| C  | 5.92712500  | 2.03058400  | 2.79497500  |
| H  | 6.46219900  | 0.86020600  | 1.08838000  |
| C  | 3.58082800  | 2.01233500  | 3.39836400  |
| H  | 2.31536500  | 0.82159600  | 2.13496000  |
| C  | 4.88662500  | 2.43871200  | 3.62752400  |
| H  | 6.94493400  | 2.33872200  | 3.00585900  |
| H  | 2.78541100  | 2.30779400  | 4.07338600  |

|    |             |             |             |
|----|-------------|-------------|-------------|
| C  | -3.89525800 | -1.62499600 | 0.13402600  |
| C  | -3.63665200 | -2.36345000 | 1.30437700  |
| C  | -3.76735400 | -2.28830400 | -1.08904900 |
| C  | -3.26217500 | -3.69909400 | 1.25830700  |
| H  | -3.71225500 | -1.85954900 | 2.26125000  |
| C  | -3.38460900 | -3.63357000 | -1.15881100 |
| H  | -3.95824100 | -1.77877400 | -2.02072700 |
| C  | -3.13111600 | -4.32758500 | 0.01548400  |
| H  | -3.06320300 | -4.25247400 | 2.16907900  |
| H  | -3.28148200 | -4.12709500 | -2.11835000 |
| C  | -5.32770100 | 0.11304300  | 1.25429900  |
| C  | -6.51898800 | -0.60347800 | 1.09578700  |
| C  | -5.25666800 | 1.09423200  | 2.24575400  |
| C  | -7.62690900 | -0.34121700 | 1.89999900  |
| H  | -6.58185500 | -1.38938600 | 0.34965100  |
| C  | -6.35393600 | 1.36872100  | 3.06136200  |
| H  | -4.32012900 | 1.62432500  | 2.37363100  |
| C  | -7.53255500 | 0.64893900  | 2.87646300  |
| H  | -8.54791400 | -0.90024900 | 1.77947100  |
| H  | -6.29724100 | 2.12663000  | 3.83474400  |
| Cl | 8.13420000  | -4.52143200 | -0.01366800 |
| Cl | 5.23276400  | 3.47883700  | 5.00123300  |
| Cl | -8.92344000 | 0.98627000  | 3.89959900  |
| Cl | -2.63654700 | -6.00993400 | -0.05651800 |
| H  | -1.06613900 | -2.19407800 | -0.07640800 |
| H  | 0.62336800  | -2.09708800 | -0.04960900 |
| C  | -0.19442100 | -2.13764600 | -2.06206300 |
| H  | -1.06934700 | -1.79284300 | -2.62579500 |
| H  | 0.68443300  | -1.74643000 | -2.59247700 |
| H  | -0.16130300 | -3.22932800 | -2.15834800 |

#### 4C'

|   |             |            |            |
|---|-------------|------------|------------|
| C | 0.67897000  | 3.42150100 | 1.16817000 |
| C | -0.42761700 | 4.28392700 | 1.32388100 |
| C | -0.21035400 | 5.65759500 | 1.45234700 |
| C | 1.07790500  | 6.18947300 | 1.43519100 |
| C | 2.16099000  | 5.33397300 | 1.23622100 |
| C | 1.98634500  | 3.95591200 | 1.07698300 |
| H | -1.06765700 | 6.31575400 | 1.57076300 |
| H | 3.16631200  | 5.74348600 | 1.17342600 |
| O | 0.48887700  | 2.10229300 | 1.09255200 |
| C | -1.82558500 | 3.72212100 | 1.36424900 |
| H | -2.54081400 | 4.55508000 | 1.41033800 |
| H | -1.97208100 | 3.13161000 | 2.27812300 |

|    |             |             |             |
|----|-------------|-------------|-------------|
| C  | -3.60479900 | 2.43402300  | 0.27762900  |
| C  | -1.95626600 | 3.45650700  | -1.09914900 |
| C  | -4.33621200 | 3.53828500  | -0.52319000 |
| H  | -3.90066700 | 2.44670700  | 1.32903300  |
| C  | -3.27055000 | 4.18816400  | -1.43847200 |
| H  | -1.75418100 | 2.67527700  | -1.83255200 |
| H  | -1.08664600 | 4.11310500  | -1.05437200 |
| H  | -5.18546700 | 3.14681500  | -1.08080700 |
| H  | -4.74256500 | 4.27912900  | 0.17241500  |
| H  | -3.51238200 | 4.07106800  | -2.49718400 |
| H  | -3.18720200 | 5.25996700  | -1.23779000 |
| N  | -2.15967200 | 2.81193500  | 0.22589900  |
| C  | -3.76475100 | 0.92013700  | -0.12333300 |
| O  | -2.92402900 | 0.19337400  | 0.71214400  |
| Zn | -1.11350100 | 0.88730600  | 0.66481400  |
| H  | 1.23448700  | 7.25674900  | 1.54939300  |
| C  | 3.16053200  | 3.10977500  | 0.64252500  |
| H  | 4.04853000  | 3.75433200  | 0.58210300  |
| H  | 2.98272400  | 2.71906800  | -0.36483500 |
| C  | 4.68381600  | 1.19892600  | 0.82935200  |
| C  | 3.89438600  | 2.27638800  | 2.85362500  |
| C  | 5.78488100  | 1.13984100  | 1.90318100  |
| H  | 5.03215300  | 1.85060200  | 0.02278200  |
| C  | 5.42752000  | 2.29726600  | 2.84964300  |
| H  | 3.51800000  | 1.52674600  | 3.55789100  |
| H  | 3.43290400  | 3.22967200  | 3.11922500  |
| H  | 5.78038200  | 0.18686300  | 2.43698500  |
| H  | 6.77320400  | 1.24880400  | 1.45243600  |
| H  | 5.85329500  | 2.18752400  | 3.85066700  |
| H  | 5.78810800  | 3.24689000  | 2.43877800  |
| N  | 3.49526800  | 1.90064200  | 1.46852000  |
| C  | 4.24092900  | -0.10187400 | 0.07571000  |
| O  | 3.07766300  | 0.25335700  | -0.63484700 |
| Zn | 1.82265400  | 0.58339600  | 0.91052400  |
| C  | 0.33399700  | -0.85547600 | 0.84762900  |
| C  | -0.37791500 | -1.42139800 | 1.94096000  |
| C  | 0.33855000  | -1.65918500 | -0.33021200 |
| C  | -1.14313300 | -2.56887000 | 1.85511800  |
| H  | -0.36437000 | -0.90453900 | 2.90092200  |
| C  | -0.44056200 | -2.80846300 | -0.44850700 |
| C  | -1.24200400 | -3.26312500 | 0.62080700  |
| H  | -1.69640700 | -2.89699000 | 2.72327300  |
| H  | -0.40852200 | -3.33015500 | -1.39548600 |
| O  | 1.06359800  | -1.32078300 | -1.42754900 |

|   |             |             |             |
|---|-------------|-------------|-------------|
| H | 1.85899700  | -0.76653200 | -1.18306300 |
| N | -2.07268300 | -4.35451600 | 0.47595400  |
| C | -2.99174700 | -4.72600200 | 1.54994800  |
| H | -3.31250200 | -5.75464100 | 1.35931600  |
| H | -2.43567100 | -4.75628100 | 2.49196100  |
| C | -2.31714600 | -4.92298100 | -0.84695800 |
| H | -1.35585900 | -5.12632900 | -1.33073400 |
| H | -2.78964900 | -5.89780000 | -0.69564300 |
| C | -3.19271900 | -4.05860600 | -1.76501700 |
| H | -3.27606900 | -4.51913900 | -2.75502700 |
| H | -4.20096500 | -3.95048800 | -1.35629500 |
| H | -2.76968200 | -3.05885200 | -1.89005500 |
| C | -4.21531700 | -3.80964400 | 1.68167500  |
| H | -4.87727200 | -3.91377300 | 0.81813800  |
| H | -4.79179900 | -4.06570800 | 2.57697000  |
| H | -3.91912400 | -2.75959200 | 1.74708800  |
| C | -5.19747000 | 0.41859300  | 0.11109100  |
| C | -5.45814200 | -0.91990200 | -0.21777100 |
| C | -6.22785700 | 1.16877400  | 0.68075900  |
| C | -6.70377900 | -1.49367400 | 0.00317600  |
| H | -4.66063700 | -1.51736300 | -0.64446700 |
| C | -7.48973800 | 0.61089500  | 0.91070400  |
| H | -6.07298400 | 2.20291300  | 0.96488600  |
| C | -7.71648300 | -0.71614000 | 0.56766000  |
| H | -6.89460800 | -2.52917900 | -0.25543200 |
| H | -8.28352400 | 1.20234800  | 1.35282800  |
| C | -3.40298900 | 0.68300700  | -1.61156300 |
| C | -4.15554400 | 1.19340200  | -2.67929300 |
| C | -2.27145800 | -0.07796100 | -1.92111100 |
| C | -3.73827900 | 1.03253300  | -3.99872100 |
| H | -5.09082300 | 1.70717800  | -2.49070600 |
| C | -1.82853200 | -0.24866900 | -3.23424800 |
| H | -1.76273200 | -0.60955100 | -1.12860100 |
| C | -2.56040500 | 0.33123300  | -4.26499700 |
| H | -4.32170000 | 1.43978500  | -4.81699000 |
| H | -0.93164300 | -0.82462800 | -3.43267700 |
| C | 3.85840100  | -1.30976500 | 0.96153100  |
| C | 3.51770700  | -2.49314000 | 0.28430500  |
| C | 3.58200100  | -1.24528800 | 2.33379200  |
| C | 2.88466700  | -3.54631300 | 0.93007700  |
| H | 3.70757800  | -2.56215600 | -0.78067600 |
| C | 2.95543100  | -2.30162100 | 3.00431300  |
| H | 3.83632700  | -0.36904400 | 2.91359600  |
| C | 2.59348800  | -3.43627400 | 2.29148600  |

|    |             |             |             |
|----|-------------|-------------|-------------|
| H  | 2.59389200  | -4.43579200 | 0.38403500  |
| H  | 2.73736500  | -2.22950700 | 4.06368600  |
| C  | 5.38113300  | -0.47471600 | -0.87202600 |
| C  | 6.52012100  | -1.14933600 | -0.41869900 |
| C  | 5.30740800  | -0.09617000 | -2.21383500 |
| C  | 7.57613100  | -1.43304400 | -1.28251200 |
| H  | 6.57842200  | -1.47496300 | 0.61535600  |
| C  | 6.35305200  | -0.37512600 | -3.09373800 |
| H  | 4.41022300  | 0.40671500  | -2.55536100 |
| C  | 7.48136500  | -1.03838600 | -2.61646000 |
| H  | 8.45677700  | -1.95955500 | -0.93252100 |
| H  | 6.29379800  | -0.08737600 | -4.13741900 |
| Cl | -9.30026600 | -1.42924200 | 0.84876500  |
| Cl | -2.02279400 | 0.14966400  | -5.92872600 |
| Cl | 8.80671100  | -1.39518400 | -3.71636300 |
| Cl | 1.75426900  | -4.74431300 | 3.10323900  |

4'

|   |             |            |             |
|---|-------------|------------|-------------|
| C | 0.05873800  | 3.66111800 | 0.39700400  |
| C | 1.25405400  | 4.37598100 | 0.64450400  |
| C | 1.18541400  | 5.67964500 | 1.14276400  |
| C | -0.03646500 | 6.30282800 | 1.37994000  |
| C | -1.20961000 | 5.59205600 | 1.13858800  |
| C | -1.18956300 | 4.27488000 | 0.66961800  |
| H | 2.11232700  | 6.21410300 | 1.33524400  |
| H | -2.17153600 | 6.05831100 | 1.33623800  |
| O | 0.11160700  | 2.41304500 | -0.08540300 |
| C | 2.60613800  | 3.79268900 | 0.31775600  |
| H | 3.38037300  | 4.46403200 | 0.71428900  |
| H | 2.74953600  | 3.76777500 | -0.77113100 |
| C | 4.25157600  | 1.99238600 | 0.51246700  |
| C | 2.64542200  | 2.23730600 | 2.25710900  |
| C | 5.04076400  | 2.42300600 | 1.77266000  |
| H | 4.57714900  | 2.55751700 | -0.36334700 |
| C | 4.00594900  | 2.53758900 | 2.91817300  |
| H | 2.34967200  | 1.20439200 | 2.44938700  |
| H | 1.83813700  | 2.89139700 | 2.58963800  |
| H | 5.85549600  | 1.73976000 | 2.00589800  |
| H | 5.50517300  | 3.39633000 | 1.58578600  |
| H | 4.20489700  | 1.82604800 | 3.72265500  |
| H | 4.01973600  | 3.53929900 | 3.35615900  |
| N | 2.84033800  | 2.39830800 | 0.79237300  |
| C | 4.27579300  | 0.50362000 | 0.00073300  |
| O | 3.39132400  | 0.43797800 | -1.07691000 |

|    |             |             |             |
|----|-------------|-------------|-------------|
| Zn | 1.67107200  | 1.12753500  | -0.53592000 |
| H  | -0.07472100 | 7.31989200  | 1.75481100  |
| C  | -2.50146800 | 3.52807400  | 0.58909500  |
| H  | -3.31545800 | 4.23588500  | 0.79998800  |
| H  | -2.55250300 | 2.75673700  | 1.36600300  |
| C  | -4.14198800 | 2.12217000  | -0.57262800 |
| C  | -2.86803300 | 3.74343700  | -1.85059400 |
| C  | -4.98950400 | 2.62786000  | -1.75230000 |
| H  | -4.59689000 | 2.48404100  | 0.35480700  |
| C  | -4.36268600 | 3.99043700  | -2.08537400 |
| H  | -2.40922000 | 3.27418700  | -2.72774100 |
| H  | -2.29350800 | 4.64534100  | -1.63058700 |
| H  | -4.92466900 | 1.95335500  | -2.60945600 |
| H  | -6.04292300 | 2.69844600  | -1.47452800 |
| H  | -4.57866800 | 4.33233500  | -3.10116700 |
| H  | -4.72957900 | 4.75590900  | -1.39224100 |
| N  | -2.79515200 | 2.81026800  | -0.69200300 |
| C  | -3.97468400 | 0.57908800  | -0.32781600 |
| O  | -2.92721600 | 0.42050000  | 0.59685000  |
| Zn | -1.41292600 | 1.12578700  | -0.40554700 |
| C  | 0.58725800  | -2.05073100 | -2.18006200 |
| C  | 0.49633300  | -3.44141400 | -2.14902900 |
| C  | 0.02302100  | -1.33499600 | -1.12225300 |
| C  | -0.12038700 | -4.11624800 | -1.09927800 |
| H  | 0.91840800  | -4.01981500 | -2.96514900 |
| C  | -0.60114600 | -1.99167300 | -0.06023900 |
| C  | -0.67903000 | -3.39770900 | -0.01544800 |
| H  | -0.14402100 | -5.19753200 | -1.11771800 |
| H  | -1.05867800 | -1.38732400 | 0.71078100  |
| O  | 0.08674600  | 0.03225100  | -1.10637500 |
| N  | -1.28061500 | -4.03599300 | 1.06124300  |
| C  | -1.22889400 | -5.48751600 | 1.18382000  |
| H  | -2.02606600 | -5.78573300 | 1.87233500  |
| H  | -1.48356000 | -5.94029500 | 0.22074800  |
| C  | -1.60610200 | -3.29689600 | 2.28103100  |
| H  | -1.54519400 | -4.00388200 | 3.11404700  |
| H  | -0.83631700 | -2.53982400 | 2.47663400  |
| C  | -2.99106900 | -2.64458800 | 2.25825800  |
| H  | -3.22243400 | -2.21708400 | 3.24054400  |
| H  | -3.04496200 | -1.83562000 | 1.52705900  |
| H  | -3.76014900 | -3.38738900 | 2.02215700  |
| C  | 0.12225500  | -6.01167300 | 1.68559600  |
| H  | 0.36101600  | -5.59114900 | 2.66773700  |
| H  | 0.11072500  | -7.10318500 | 1.77467500  |

|    |             |             |             |
|----|-------------|-------------|-------------|
| H  | 0.92566700  | -5.73062600 | 0.99920300  |
| C  | 5.67060600  | 0.11095700  | -0.51149300 |
| C  | 5.81953200  | -1.18830000 | -1.01863600 |
| C  | 6.77559100  | 0.96396500  | -0.55374200 |
| C  | 7.02920100  | -1.63109100 | -1.53936500 |
| H  | 4.96528200  | -1.85614000 | -1.00689800 |
| C  | 8.00253800  | 0.53755000  | -1.07144900 |
| H  | 6.70941300  | 1.98287800  | -0.19179800 |
| C  | 8.11885100  | -0.75885500 | -1.55687300 |
| H  | 7.13241800  | -2.63770500 | -1.92846100 |
| H  | 8.85432200  | 1.20772300  | -1.09758400 |
| C  | 3.86758000  | -0.50838600 | 1.10454700  |
| C  | 4.58597000  | -0.68683200 | 2.29730800  |
| C  | 2.74858900  | -1.32164100 | 0.89518700  |
| C  | 4.15071300  | -1.57197800 | 3.28119000  |
| H  | 5.51184700  | -0.15025100 | 2.46341200  |
| C  | 2.29978800  | -2.22356500 | 1.86246000  |
| H  | 2.25449800  | -1.30468200 | -0.06695600 |
| C  | 2.99399300  | -2.32223100 | 3.06146700  |
| H  | 4.70805500  | -1.69127800 | 4.20363500  |
| H  | 1.43521000  | -2.84436100 | 1.66454400  |
| C  | -3.59560200 | -0.26575000 | -1.56448200 |
| C  | -3.68696700 | -1.66328600 | -1.45141500 |
| C  | -2.95436300 | 0.24958900  | -2.70025100 |
| C  | -3.18090700 | -2.51222000 | -2.42735400 |
| H  | -4.14789900 | -2.09090500 | -0.56905000 |
| C  | -2.43154800 | -0.58907000 | -3.68988700 |
| H  | -2.85654900 | 1.31674000  | -2.85046300 |
| C  | -2.55270400 | -1.96511000 | -3.54667600 |
| H  | -3.24365500 | -3.58745200 | -2.31212100 |
| H  | -1.93775000 | -0.17233500 | -4.56004300 |
| C  | -5.30149800 | 0.10033300  | 0.26506400  |
| C  | -6.42013700 | -0.14897100 | -0.53778200 |
| C  | -5.41854500 | -0.04287100 | 1.64910100  |
| C  | -7.63625400 | -0.53240200 | 0.02511700  |
| H  | -6.33944400 | -0.06414900 | -1.61696400 |
| C  | -6.62604500 | -0.42929100 | 2.23001100  |
| H  | -4.54030500 | 0.13750300  | 2.25697200  |
| C  | -7.72632100 | -0.66833700 | 1.40965100  |
| H  | -8.50050900 | -0.73171100 | -0.59825000 |
| H  | -6.71394300 | -0.54872200 | 3.30408800  |
| Cl | 9.65908900  | -1.30919000 | -2.20431500 |
| Cl | 2.42987300  | -3.43556100 | 4.30166100  |
| Cl | -9.25420800 | -1.15884700 | 2.13035800  |



|            |             |             |             |
|------------|-------------|-------------|-------------|
| Cl         | -1.91468400 | -3.02538200 | -4.78832600 |
| H          | 1.06964100  | -1.52365800 | -2.99460000 |
| <b>5a'</b> |             |             |             |
| C          | -0.64334600 | -1.93197400 | 2.98689500  |
| C          | 0.48606700  | -2.16297400 | 3.81405000  |
| C          | 0.31087100  | -2.77307200 | 5.06116700  |
| C          | -0.94289900 | -3.15854600 | 5.52364500  |
| C          | -2.04501500 | -2.96440000 | 4.69461300  |
| C          | -1.91721200 | -2.37671200 | 3.43484200  |
| H          | 1.18841000  | -2.94686500 | 5.67921400  |
| H          | -3.03026900 | -3.29262900 | 5.01656800  |
| O          | -0.52830300 | -1.35047000 | 1.78401500  |
| C          | 1.89312900  | -1.78149600 | 3.41286900  |
| H          | 2.58719300  | -2.25159900 | 4.12320600  |
| H          | 2.05235800  | -0.70162000 | 3.50598200  |
| C          | 3.68580100  | -1.85314800 | 1.74745600  |
| C          | 2.10705200  | -3.61424800 | 1.79301000  |
| C          | 4.45012100  | -3.07672500 | 2.29520600  |
| H          | 3.92563300  | -0.94267100 | 2.30173900  |
| C          | 3.44803000  | -4.25478200 | 2.22140700  |
| H          | 1.92160100  | -3.78879000 | 0.73482400  |
| H          | 1.24933900  | -3.98305900 | 2.35634900  |
| H          | 5.36850900  | -3.27219300 | 1.74339200  |
| H          | 4.74473200  | -2.88840500 | 3.33225300  |
| H          | 3.76027800  | -5.00506400 | 1.49246000  |
| H          | 3.35800900  | -4.75283500 | 3.19042800  |
| N          | 2.24948400  | -2.14861200 | 2.01430800  |
| C          | 3.89100300  | -1.45488100 | 0.23802500  |
| O          | 2.94402700  | -0.49121200 | -0.07375500 |
| Zn         | 1.18084600  | -0.59410200 | 0.79935400  |
| H          | -1.05517000 | -3.62263300 | 6.49754700  |
| C          | -3.12468200 | -2.29537900 | 2.53565900  |
| H          | -3.93423400 | -2.90199800 | 2.96497800  |
| H          | -2.88482300 | -2.71874600 | 1.55515000  |
| C          | -4.76322900 | -0.93044200 | 1.30431000  |
| C          | -4.08208300 | -0.21378100 | 3.49185900  |
| C          | -6.04758700 | -0.67183100 | 2.13191900  |
| H          | -4.79744900 | -1.93929600 | 0.88984200  |
| C          | -5.57580100 | -0.55427700 | 3.59949100  |
| H          | -3.92299800 | 0.85862700  | 3.36140600  |
| H          | -3.48937400 | -0.53352700 | 4.35068400  |
| H          | -6.56734600 | 0.22548800  | 1.79599800  |
| H          | -6.75538300 | -1.49404100 | 2.00427700  |

|    |             |             |             |
|----|-------------|-------------|-------------|
| H  | -6.13053900 | 0.19676700  | 4.16939500  |
| H  | -5.70595900 | -1.51074300 | 4.11658500  |
| N  | -3.60650100 | -0.90587500 | 2.26985800  |
| C  | -4.43925300 | -0.07171800 | 0.02396200  |
| O  | -3.19136200 | -0.51892600 | -0.41525000 |
| Zn | -1.99938000 | -0.11075300 | 1.07118600  |
| C  | 0.92929400  | 1.41010000  | 2.01773300  |
| C  | 2.19254500  | 2.06089100  | 2.02100600  |
| C  | -0.20935500 | 2.14445500  | 1.53853700  |
| C  | 2.36047900  | 3.33921300  | 1.54668200  |
| H  | 3.06042500  | 1.52817900  | 2.40202000  |
| C  | -0.02094400 | 3.44994800  | 1.04659800  |
| C  | 1.22242700  | 4.09505600  | 1.11042400  |
| H  | 3.35102100  | 3.77231100  | 1.51441200  |
| H  | -0.91478200 | 3.95869100  | 0.71653200  |
| O  | -1.42231400 | 1.66037300  | 1.59283300  |
| N  | 1.34872400  | 5.42861300  | 0.78878400  |
| C  | 2.51255100  | 6.20242700  | 1.21568700  |
| H  | 2.15383600  | 7.18330700  | 1.54777700  |
| H  | 2.94956700  | 5.72727300  | 2.09831300  |
| C  | 0.20173600  | 6.17371300  | 0.26752100  |
| H  | -0.67669200 | 6.00113700  | 0.90082900  |
| H  | 0.44247400  | 7.23624300  | 0.35532700  |
| N  | 0.31699200  | 1.42232300  | -2.09042300 |
| C  | 1.57461300  | 1.48249200  | -1.77658400 |
| H  | 2.10692800  | 0.61464200  | -1.37431900 |
| C  | 2.41940600  | 2.63022600  | -2.05136600 |
| C  | 2.00354000  | 3.70249600  | -2.85713800 |
| C  | 3.75164300  | 2.56340500  | -1.60474500 |
| C  | 2.91728200  | 4.68312300  | -3.22542700 |
| H  | 0.97815000  | 3.72678200  | -3.20783400 |
| C  | 4.66327000  | 3.54489500  | -1.98046800 |
| H  | 4.04893700  | 1.72871900  | -0.97994100 |
| C  | 4.24740400  | 4.60034800  | -2.79693400 |
| H  | 2.60344900  | 5.50559300  | -3.86088900 |
| H  | 5.69470100  | 3.48066800  | -1.64769100 |
| H  | 4.95912500  | 5.36270100  | -3.09972100 |
| C  | -1.51128400 | -4.18386200 | -1.09720400 |
| C  | -2.22504600 | -4.11132300 | -2.30368300 |
| C  | -2.24438300 | -2.93402700 | -3.04653800 |
| C  | -1.53906300 | -1.83560700 | -2.55684300 |
| C  | -0.82099800 | -1.89598700 | -1.34332700 |
| C  | -0.80911800 | -3.08741400 | -0.60915900 |
| H  | -1.49923900 | -5.11307800 | -0.53671400 |

|   |             |             |             |
|---|-------------|-------------|-------------|
| H | -2.76404300 | -4.98108100 | -2.66498700 |
| H | -2.79563300 | -2.86982600 | -3.97834200 |
| H | -0.27639300 | -3.13592500 | 0.32873700  |
| S | -1.37341000 | -0.24813500 | -3.26337800 |
| N | -0.14196200 | -0.71289200 | -1.01291900 |
| C | -0.29696500 | 0.20592000  | -1.95485400 |
| C | -0.13451900 | 5.85400400  | -1.19013900 |
| H | -1.02266900 | 6.41355000  | -1.49933900 |
| H | 0.69936100  | 6.12004800  | -1.84455500 |
| H | -0.33861900 | 4.78889000  | -1.32159900 |
| C | 3.57334800  | 6.38181400  | 0.13089800  |
| H | 3.14817500  | 6.86445900  | -0.75433600 |
| H | 4.39848100  | 7.00226300  | 0.49809700  |
| H | 3.97434900  | 5.41719200  | -0.18378200 |
| C | 5.27353100  | -0.80684800 | 0.02826100  |
| C | 5.57804600  | -0.38436200 | -1.27492000 |
| C | 6.19273300  | -0.52155400 | 1.04027800  |
| C | 6.74099700  | 0.32011800  | -1.56170100 |
| H | 4.87362700  | -0.59790500 | -2.07143300 |
| C | 7.37168800  | 0.18261800  | 0.77362700  |
| H | 6.01288300  | -0.83441700 | 2.06210500  |
| C | 7.63100800  | 0.60502600  | -0.52447200 |
| H | 6.95643100  | 0.65117200  | -2.57130500 |
| H | 8.07495900  | 0.40327700  | 1.56866100  |
| C | 3.76914100  | -2.66843000 | -0.71204900 |
| C | 4.76738200  | -3.64448400 | -0.83245000 |
| C | 2.62396000  | -2.80325900 | -1.50173900 |
| C | 4.59564500  | -4.75844000 | -1.65280200 |
| H | 5.70607200  | -3.52871600 | -0.30184300 |
| C | 2.42580200  | -3.91167000 | -2.32379000 |
| H | 1.88007800  | -2.02105100 | -1.46958500 |
| C | 3.41278800  | -4.89194200 | -2.37954600 |
| H | 5.37176900  | -5.51087500 | -1.73627400 |
| H | 1.51800000  | -4.01002300 | -2.90847600 |
| C | -4.36084400 | 1.46535300  | 0.18754900  |
| C | -3.66320700 | 2.13100600  | -0.83530100 |
| C | -4.85348800 | 2.23714500  | 1.24264200  |
| C | -3.44393600 | 3.50142700  | -0.80395100 |
| H | -3.26152200 | 1.53825100  | -1.64779400 |
| C | -4.63341600 | 3.61742600  | 1.30182600  |
| H | -5.40951100 | 1.78934000  | 2.05307000  |
| C | -3.92646500 | 4.23487000  | 0.27996700  |
| H | -2.89409700 | 3.99469400  | -1.59738000 |
| H | -5.00471200 | 4.19881600  | 2.13809700  |

|    |             |             |             |
|----|-------------|-------------|-------------|
| C  | -5.51366000 | -0.42688600 | -1.01171200 |
| C  | -6.71409000 | 0.27819700  | -1.13571200 |
| C  | -5.29205800 | -1.53227200 | -1.83934300 |
| C  | -7.68370600 | -0.11206800 | -2.06053800 |
| H  | -6.89074300 | 1.15629700  | -0.52288300 |
| C  | -6.24769200 | -1.93616400 | -2.76861400 |
| H  | -4.34869600 | -2.05579300 | -1.74805100 |
| C  | -7.43973900 | -1.21999800 | -2.86833900 |
| H  | -8.61164200 | 0.43970800  | -2.16019400 |
| H  | -6.07327000 | -2.79177100 | -3.41212900 |
| Cl | 9.09759900  | 1.51302900  | -0.86868900 |
| Cl | 3.17887100  | -6.30464700 | -3.39971100 |
| Cl | -8.65348600 | -1.71873800 | -4.04319000 |
| Cl | -3.63412300 | 5.97172400  | 0.35276000  |
| H  | 0.71783900  | 0.65729400  | 2.77369300  |

**TS-6a'**

|    |             |             |             |
|----|-------------|-------------|-------------|
| C  | -0.23380400 | -1.79813300 | 2.94431500  |
| C  | 0.91433300  | -1.64128700 | 3.75142900  |
| C  | 0.87389600  | -2.04121600 | 5.09058900  |
| C  | -0.28346000 | -2.57312300 | 5.65366500  |
| C  | -1.41835900 | -2.70906900 | 4.85572700  |
| C  | -1.41161000 | -2.33672700 | 3.50976500  |
| H  | 1.76627700  | -1.91787500 | 5.69933800  |
| H  | -2.33147500 | -3.12199600 | 5.27700200  |
| O  | -0.21455600 | -1.44658900 | 1.64702100  |
| C  | 2.15384900  | -0.99260500 | 3.20027500  |
| H  | 2.90339100  | -0.91931800 | 3.99876400  |
| H  | 1.92803100  | 0.03076200  | 2.88144500  |
| C  | 3.96187000  | -0.98229700 | 1.55351500  |
| C  | 3.17347900  | -3.07443700 | 2.35407900  |
| C  | 5.07282400  | -1.51951100 | 2.47683800  |
| H  | 3.77805600  | 0.08179500  | 1.71685900  |
| C  | 4.64361400  | -2.96394900 | 2.82696000  |
| H  | 3.11029100  | -3.69242000 | 1.45811200  |
| H  | 2.49763000  | -3.48914300 | 3.10313000  |
| H  | 6.05771200  | -1.48465200 | 2.01463500  |
| H  | 5.12348600  | -0.90348700 | 3.38012200  |
| H  | 5.26328400  | -3.69601800 | 2.30567200  |
| H  | 4.73635600  | -3.15474800 | 3.89900900  |
| N  | 2.73066200  | -1.69286500 | 2.01147300  |
| C  | 4.16751000  | -1.12222600 | -0.00978900 |
| O  | 2.93963200  | -1.01906900 | -0.64618700 |
| Zn | 1.33915300  | -1.38277700 | 0.34120300  |

|    |             |             |             |
|----|-------------|-------------|-------------|
| H  | -0.30187100 | -2.87411100 | 6.69561800  |
| C  | -2.63423500 | -2.53375700 | 2.65619100  |
| H  | -3.39016300 | -3.09039400 | 3.22736200  |
| H  | -2.38225200 | -3.13648700 | 1.77718600  |
| C  | -4.43088200 | -1.56181100 | 1.31400700  |
| C  | -3.65796800 | -0.34693700 | 3.20738700  |
| C  | -5.62455800 | -1.48619600 | 2.29913900  |
| H  | -4.31682300 | -2.58198300 | 0.94510300  |
| C  | -5.08132400 | -0.80137500 | 3.58026700  |
| H  | -3.66168700 | 0.66734300  | 2.80523000  |
| H  | -2.95102800 | -0.37851600 | 4.03825200  |
| H  | -6.47563400 | -0.96498300 | 1.86049300  |
| H  | -5.97969000 | -2.49469600 | 2.52656000  |
| H  | -5.69560000 | 0.04261100  | 3.90694200  |
| H  | -5.05360100 | -1.51261600 | 4.41132100  |
| N  | -3.20748200 | -1.26104400 | 2.12920700  |
| C  | -4.41885100 | -0.74793800 | -0.03957800 |
| O  | -3.18568300 | -1.02083200 | -0.61406600 |
| Zn | -1.78067900 | -0.51771900 | 0.62812500  |
| C  | 0.84763100  | 1.75458300  | 0.76260200  |
| C  | 1.88638900  | 2.61553000  | 1.27291700  |
| C  | -0.52096500 | 2.24985400  | 0.88135200  |
| C  | 1.66569100  | 3.93475500  | 1.49767400  |
| H  | 2.89385700  | 2.22026100  | 1.36749100  |
| C  | -0.72286000 | 3.63651400  | 1.02266900  |
| C  | 0.33965400  | 4.50058100  | 1.31906000  |
| H  | 2.49387800  | 4.56948700  | 1.77705700  |
| H  | -1.74586000 | 3.98128200  | 0.96730000  |
| O  | -1.51331700 | 1.44513200  | 0.80584300  |
| N  | 0.14711900  | 5.84274200  | 1.48124800  |
| C  | 1.24364900  | 6.74425600  | 1.84173200  |
| H  | 0.79165400  | 7.62309400  | 2.31015700  |
| H  | 1.85152700  | 6.27251000  | 2.61853000  |
| C  | -1.13332900 | 6.45937500  | 1.11424700  |
| H  | -1.95133800 | 5.89652800  | 1.57316500  |
| H  | -1.15062900 | 7.45308200  | 1.56886500  |
| N  | 0.05913000  | 1.17905200  | -1.88390800 |
| C  | 1.16610000  | 1.60273400  | -1.18325700 |
| H  | 1.97601200  | 0.87510500  | -1.07648400 |
| C  | 1.65072600  | 2.94755300  | -1.60128500 |
| C  | 0.77350600  | 3.90882500  | -2.11589700 |
| C  | 3.01590100  | 3.24652400  | -1.51483800 |
| C  | 1.25655800  | 5.14543700  | -2.53948600 |
| H  | -0.27672100 | 3.65564500  | -2.20308400 |

|   |             |             |             |
|---|-------------|-------------|-------------|
| C | 3.50335000  | 4.47804600  | -1.94815400 |
| H | 3.69936400  | 2.50342600  | -1.12112700 |
| C | 2.62183400  | 5.43226300  | -2.46191100 |
| H | 0.56902300  | 5.88232400  | -2.94365600 |
| H | 4.56802700  | 4.68423200  | -1.89721000 |
| H | 2.99752500  | 6.39148300  | -2.80616500 |
| C | -1.36732800 | -4.61675100 | -1.50445800 |
| C | -2.03474900 | -4.48336300 | -2.72654500 |
| C | -2.07008400 | -3.25129900 | -3.38557000 |
| C | -1.42324900 | -2.16413000 | -2.80741900 |
| C | -0.73782200 | -2.29294200 | -1.58263600 |
| C | -0.71647400 | -3.52591400 | -0.92522300 |
| H | -1.35552900 | -5.57639100 | -0.99736800 |
| H | -2.53531700 | -5.34003500 | -3.16606900 |
| H | -2.60321000 | -3.14151800 | -4.32397800 |
| H | -0.24133100 | -3.62192000 | 0.04796200  |
| S | -1.33270800 | -0.50694200 | -3.37092300 |
| N | -0.15838300 | -1.11028900 | -1.10082800 |
| C | -0.33833400 | -0.05798500 | -1.95385200 |
| C | -1.35516500 | 6.56875600  | -0.39630700 |
| H | -2.33091700 | 7.01790200  | -0.59786100 |
| H | -0.58078600 | 7.18266400  | -0.86286000 |
| H | -1.33268300 | 5.58272100  | -0.86367900 |
| C | 2.12071500  | 7.17368900  | 0.66227100  |
| H | 1.53920100  | 7.73455900  | -0.07396300 |
| H | 2.93552100  | 7.81585500  | 1.01342700  |
| H | 2.55005700  | 6.30942100  | 0.15125700  |
| C | 5.04231500  | 0.04126900  | -0.52046100 |
| C | 5.08740600  | 0.22378100  | -1.91099800 |
| C | 5.74808100  | 0.93799300  | 0.28585600  |
| C | 5.79972200  | 1.27059200  | -2.48313200 |
| H | 4.52642900  | -0.45724300 | -2.54037500 |
| C | 6.46603200  | 2.00266000  | -0.27080300 |
| H | 5.75518100  | 0.83482300  | 1.36486800  |
| C | 6.48232500  | 2.16020100  | -1.65105900 |
| H | 5.81352600  | 1.41213600  | -3.55759200 |
| H | 7.00112600  | 2.69994200  | 0.36380300  |
| C | 4.85392200  | -2.45245200 | -0.39217500 |
| C | 6.23528900  | -2.64784200 | -0.26403700 |
| C | 4.08728100  | -3.50138800 | -0.90881200 |
| C | 6.82706500  | -3.87191100 | -0.57089200 |
| H | 6.86984700  | -1.82708200 | 0.05291900  |
| C | 4.65790100  | -4.73425600 | -1.22263800 |
| H | 3.03230600  | -3.33447800 | -1.09124700 |

|    |             |             |             |
|----|-------------|-------------|-------------|
| C  | 6.02633800  | -4.91412200 | -1.03486400 |
| H  | 7.89674800  | -4.01345100 | -0.46578400 |
| H  | 4.05259500  | -5.54108100 | -1.62048400 |
| C  | -4.60859800 | 0.78521500  | 0.05393800  |
| C  | -3.96851400 | 1.54338800  | -0.93776000 |
| C  | -5.34556500 | 1.47389300  | 1.02359700  |
| C  | -4.02138000 | 2.93295800  | -0.94591700 |
| H  | -3.39143900 | 1.01696700  | -1.68762900 |
| C  | -5.40028300 | 2.87015800  | 1.04458100  |
| H  | -5.88669300 | 0.94352000  | 1.79417200  |
| C  | -4.72630000 | 3.58572800  | 0.06267100  |
| H  | -3.50599400 | 3.50198100  | -1.71154200 |
| H  | -5.95775800 | 3.39022100  | 1.81550000  |
| C  | -5.53098500 | -1.35695500 | -0.91097700 |
| C  | -6.85176100 | -0.89938200 | -0.91008400 |
| C  | -5.19845600 | -2.45038000 | -1.71854800 |
| C  | -7.83035500 | -1.52540100 | -1.68426100 |
| H  | -7.12502400 | -0.02905700 | -0.32268700 |
| C  | -6.16106600 | -3.08697200 | -2.49784000 |
| H  | -4.16597800 | -2.77576900 | -1.73617100 |
| C  | -7.47376400 | -2.61856700 | -2.46921700 |
| H  | -8.85278400 | -1.16459000 | -1.68622400 |
| H  | -5.89816200 | -3.93163400 | -3.12542000 |
| Cl | 7.35842000  | 3.51032400  | -2.35831800 |
| Cl | 6.75925300  | -6.46442900 | -1.41775100 |
| Cl | -8.70010600 | -3.41485600 | -3.45264700 |
| Cl | -4.76572700 | 5.35030000  | 0.10296600  |
| H  | 0.92601000  | 0.70984400  | 1.04369000  |

**5b'**

|   |             |             |            |
|---|-------------|-------------|------------|
| C | 0.56244300  | -3.75642000 | 0.46540700 |
| C | -0.56706400 | -4.55963800 | 0.75514300 |
| C | -0.41808300 | -5.94759100 | 0.81127900 |
| C | 0.81153700  | -6.56063900 | 0.58532700 |
| C | 1.93006600  | -5.76021300 | 0.35957000 |
| C | 1.83332100  | -4.36664200 | 0.32388800 |
| H | -1.29187000 | -6.55612000 | 1.03131500 |
| H | 2.90721900  | -6.21937300 | 0.23201200 |
| O | 0.43558000  | -2.43499200 | 0.30892100 |
| C | -1.94898400 | -3.97744800 | 0.97132800 |
| H | -2.52560200 | -4.68986000 | 1.58123300 |
| H | -2.47643400 | -3.90062300 | 0.01048000 |
| C | -3.33247700 | -2.16755800 | 1.90291400 |
| C | -1.20292100 | -2.56665700 | 2.85902100 |

|    |             |             |             |
|----|-------------|-------------|-------------|
| C  | -3.60811000 | -2.71860500 | 3.31786100  |
| H  | -4.00494800 | -2.60034100 | 1.15756000  |
| C  | -2.22147500 | -2.82870500 | 3.99189700  |
| H  | -0.76388500 | -1.57473400 | 2.95779300  |
| H  | -0.39005800 | -3.29114000 | 2.83974800  |
| H  | -4.29699500 | -2.09461200 | 3.88588900  |
| H  | -4.07387100 | -3.70617400 | 3.23619600  |
| H  | -2.10342100 | -2.08960600 | 4.78691300  |
| H  | -2.07839800 | -3.81702500 | 4.43695600  |
| N  | -1.95706200 | -2.62280200 | 1.57571300  |
| C  | -3.44210800 | -0.61314200 | 1.66631900  |
| O  | -2.89088000 | -0.34718700 | 0.42776700  |
| Zn | -1.28715700 | -1.28801300 | -0.14961600 |
| H  | 0.90360800  | -7.64100800 | 0.61726000  |
| C  | 3.10465800  | -3.55349400 | 0.28904500  |
| H  | 3.95399000  | -4.24421000 | 0.19291800  |
| H  | 3.23498600  | -3.03336300 | 1.24498600  |
| C  | 4.57348300  | -1.81120900 | -0.57535400 |
| C  | 3.17910400  | -3.04251000 | -2.13154100 |
| C  | 5.32256400  | -1.99230400 | -1.90997700 |
| H  | 5.10254500  | -2.38900400 | 0.18725300  |
| C  | 4.64283400  | -3.21287800 | -2.55106900 |
| H  | 2.66402500  | -2.33823200 | -2.79387000 |
| H  | 2.59941100  | -3.96805600 | -2.13029400 |
| H  | 5.21466000  | -1.11416900 | -2.55016000 |
| H  | 6.39049100  | -2.14345200 | -1.74079300 |
| H  | 4.76818800  | -3.25779200 | -3.63632500 |
| H  | 5.04827300  | -4.14056800 | -2.13163000 |
| N  | 3.22586500  | -2.48306400 | -0.75327200 |
| C  | 4.44473100  | -0.37057900 | 0.07300300  |
| O  | 3.40286500  | -0.39327500 | 1.00742300  |
| Zn | 1.83471100  | -1.00718900 | 0.07258600  |
| C  | -0.11146200 | 1.36822800  | -2.42841600 |
| C  | -0.11180000 | 2.64139800  | -3.00059600 |
| C  | 0.22263900  | 1.24876600  | -1.07296400 |
| C  | 0.21021700  | 3.77276400  | -2.26537500 |
| H  | -0.38834600 | 2.75675600  | -4.04445300 |
| C  | 0.55290000  | 2.37496800  | -0.32027700 |
| C  | 0.56810500  | 3.66036700  | -0.90019600 |
| H  | 0.17305000  | 4.74094400  | -2.74456300 |
| H  | 0.85184100  | 2.21503100  | 0.70632500  |
| O  | 0.25254200  | 0.02648000  | -0.47930700 |
| N  | 0.91323900  | 4.76998600  | -0.15190500 |
| C  | 1.22318700  | 6.04838900  | -0.77789300 |



|   |             |             |             |
|---|-------------|-------------|-------------|
| H | 1.99823500  | 6.53462900  | -0.17393500 |
| H | 1.67497600  | 5.86618000  | -1.75658300 |
| C | 1.06714000  | 4.68900100  | 1.29379900  |
| H | 0.83835500  | 5.67803500  | 1.70639100  |
| H | 0.30396400  | 4.01345800  | 1.69456900  |
| N | -3.27938000 | 0.44739900  | -2.90062300 |
| C | -2.99379200 | 1.23507200  | -1.90821500 |
| H | -2.70438400 | 0.84368700  | -0.93535300 |
| C | -3.17491300 | 2.67310300  | -1.97957700 |
| C | -2.83717700 | 3.42547000  | -0.84215800 |
| C | -3.64369700 | 3.32529400  | -3.13239600 |
| C | -2.97513700 | 4.81049000  | -0.85155200 |
| H | -2.44408200 | 2.91495100  | 0.03115100  |
| C | -3.77550900 | 4.70769100  | -3.13947200 |
| H | -3.89624100 | 2.72717400  | -4.00131100 |
| C | -3.44446100 | 5.45162900  | -1.99893900 |
| H | -2.70484000 | 5.38857000  | 0.02576200  |
| H | -4.13867600 | 5.21439000  | -4.02843800 |
| H | -3.55199500 | 6.53232900  | -2.00923700 |
| C | -0.99382900 | -5.06901900 | -2.89561800 |
| C | -2.03675900 | -5.45795100 | -3.74985800 |
| C | -3.01502900 | -4.54575600 | -4.14375300 |
| C | -2.94697400 | -3.24409300 | -3.64645800 |
| C | -1.92851300 | -2.85658300 | -2.74464000 |
| C | -0.92571600 | -3.77073900 | -2.40250600 |
| H | -0.23047800 | -5.78437800 | -2.60749000 |
| H | -2.07593600 | -6.47577700 | -4.12459200 |
| H | -3.80481100 | -4.83884000 | -4.82733800 |
| H | -0.11027400 | -3.45530400 | -1.76837200 |
| S | -3.95383000 | -1.85927700 | -4.00440700 |
| N | -2.00498400 | -1.54188600 | -2.28619800 |
| C | -2.98398200 | -0.87519700 | -2.88799300 |
| C | 2.46310000  | 4.25088500  | 1.75269900  |
| H | 2.51662000  | 4.22181000  | 2.84631700  |
| H | 2.71726200  | 3.26152300  | 1.36546100  |
| H | 3.22370500  | 4.95289300  | 1.39511700  |
| C | 0.01423600  | 6.98075100  | -0.90860500 |
| H | -0.42725500 | 7.18342700  | 0.07306300  |
| H | 0.30993400  | 7.93817000  | -1.35120700 |
| H | -0.75902600 | 6.53056000  | -1.53560800 |
| C | -4.91773100 | -0.16993400 | 1.61880500  |
| C | -5.16309500 | 1.14957200  | 1.21006200  |
| C | -6.01626900 | -0.98178100 | 1.90771400  |
| C | -6.45359200 | 1.64831600  | 1.08971200  |

|               |             |             |             |
|---------------|-------------|-------------|-------------|
| H             | -4.32154400 | 1.78834300  | 0.97112900  |
| C             | -7.32480800 | -0.49882000 | 1.79655700  |
| H             | -5.88338000 | -2.01095600 | 2.21875300  |
| C             | -7.53144900 | 0.81278200  | 1.38884000  |
| H             | -6.62718000 | 2.66824700  | 0.76560100  |
| H             | -8.17047500 | -1.13896200 | 2.02126100  |
| C             | -2.73030200 | 0.22188300  | 2.75916000  |
| C             | -3.27175600 | 0.41188300  | 4.03724100  |
| C             | -1.51932100 | 0.85763000  | 2.45998700  |
| C             | -2.60321300 | 1.15774100  | 5.00744600  |
| H             | -4.24613400 | 0.00040000  | 4.27716500  |
| C             | -0.83186300 | 1.60438900  | 3.41654100  |
| H             | -1.10937400 | 0.78030700  | 1.46194400  |
| C             | -1.37705800 | 1.73998300  | 4.69047200  |
| H             | -3.03294400 | 1.29824600  | 5.99288000  |
| H             | 0.11396000  | 2.07695100  | 3.17473400  |
| C             | 4.16852000  | 0.77732800  | -0.91784300 |
| C             | 4.54396400  | 2.08325200  | -0.56664200 |
| C             | 3.43351200  | 0.61387500  | -2.09826300 |
| C             | 4.25927300  | 3.17088100  | -1.38539300 |
| H             | 5.08065400  | 2.24823500  | 0.36028000  |
| C             | 3.14332000  | 1.69016000  | -2.93910400 |
| H             | 3.08153800  | -0.36533400 | -2.40134500 |
| C             | 3.57986500  | 2.96013200  | -2.58387100 |
| H             | 4.56938900  | 4.17092600  | -1.10475400 |
| H             | 2.58171100  | 1.54083400  | -3.85190900 |
| C             | 5.78912900  | -0.14439100 | 0.77935800  |
| C             | 6.96243700  | 0.12359800  | 0.06333200  |
| C             | 5.86140000  | -0.26545100 | 2.16786700  |
| C             | 8.18656800  | 0.26144400  | 0.71468300  |
| H             | 6.92154800  | 0.25004300  | -1.01382200 |
| C             | 7.07768300  | -0.12812000 | 2.83777400  |
| H             | 4.94353400  | -0.45860400 | 2.71008900  |
| C             | 8.23135400  | 0.13089500  | 2.10208900  |
| H             | 9.09266000  | 0.47434500  | 0.15875900  |
| H             | 7.13125800  | -0.21704900 | 3.91715200  |
| Cl            | -9.17251200 | 1.43030800  | 1.24405500  |
| Cl            | -0.52302000 | 2.68347900  | 5.90414100  |
| Cl            | 9.77156200  | 0.30577700  | 2.93535200  |
| Cl            | 3.30752700  | 4.31441500  | -3.67119600 |
| H             | -0.34631600 | 0.47883000  | -2.99977800 |
| <b>TS-6b'</b> |             |             |             |
| C             | 0.41783100  | -3.75662900 | 0.66554700  |

|    |             |             |             |
|----|-------------|-------------|-------------|
| C  | -0.73923500 | -4.54984200 | 0.86382100  |
| C  | -0.60378600 | -5.93642000 | 0.96410200  |
| C  | 0.63631900  | -6.56177900 | 0.86648700  |
| C  | 1.77395000  | -5.77384900 | 0.71392200  |
| C  | 1.68889700  | -4.38083400 | 0.63554600  |
| H  | -1.49848500 | -6.53507500 | 1.11538500  |
| H  | 2.75485800  | -6.24047100 | 0.67142200  |
| O  | 0.31448600  | -2.43046100 | 0.49287300  |
| C  | -2.13652500 | -3.96695000 | 0.93319200  |
| H  | -2.77067800 | -4.67283800 | 1.49103100  |
| H  | -2.56234700 | -3.90478000 | -0.07815300 |
| C  | -3.59866900 | -2.14115000 | 1.71784300  |
| C  | -1.56041500 | -2.52899500 | 2.85889300  |
| C  | -3.99489800 | -2.68604400 | 3.10628200  |
| H  | -4.20612400 | -2.57302700 | 0.91800800  |
| C  | -2.67379600 | -2.76989000 | 3.90345000  |
| H  | -1.12932300 | -1.53578700 | 2.97756300  |
| H  | -0.75123100 | -3.25488000 | 2.92395000  |
| H  | -4.73736500 | -2.06632700 | 3.60700900  |
| H  | -4.43832800 | -3.68071600 | 2.99216500  |
| H  | -2.63172900 | -2.00953600 | 4.68609600  |
| H  | -2.56565500 | -3.74535900 | 4.38532500  |
| N  | -2.20014800 | -2.60563600 | 1.51631600  |
| C  | -3.67943400 | -0.58204300 | 1.47594400  |
| O  | -2.96481500 | -0.29339400 | 0.33470700  |
| Zn | -1.39006600 | -1.32323700 | -0.16461700 |
| H  | 0.71665800  | -7.64149300 | 0.93167500  |
| C  | 2.96837700  | -3.58199500 | 0.62942200  |
| H  | 3.81484500  | -4.28136900 | 0.59611000  |
| H  | 3.07154300  | -3.02281900 | 1.56759600  |
| C  | 4.48469300  | -1.91011600 | -0.31080600 |
| C  | 3.07721000  | -3.19734500 | -1.81021900 |
| C  | 5.24767500  | -2.20324800 | -1.61850800 |
| H  | 4.98841700  | -2.43566500 | 0.50474500  |
| C  | 4.53901900  | -3.43848900 | -2.19537000 |
| H  | 2.59331600  | -2.51674700 | -2.51806700 |
| H  | 2.46570200  | -4.09992100 | -1.76808200 |
| H  | 5.17342000  | -1.36408400 | -2.31431300 |
| H  | 6.30802300  | -2.37561900 | -1.42470400 |
| H  | 4.67759100  | -3.55155600 | -3.27384100 |
| H  | 4.90860200  | -4.35191100 | -1.71590400 |
| N  | 3.12792700  | -2.56484000 | -0.46195300 |
| C  | 4.38584600  | -0.41405300 | 0.20916200  |
| O  | 3.32443200  | -0.30822700 | 1.11378500  |

|    |             |             |             |
|----|-------------|-------------|-------------|
| Zn | 1.74854000  | -1.06380100 | 0.31796100  |
| C  | -0.28918100 | 1.38841200  | -2.11368300 |
| C  | 0.01520600  | 2.60640000  | -2.82771700 |
| C  | 0.27980800  | 1.28431000  | -0.78133300 |
| C  | 0.55184700  | 3.69039100  | -2.21203100 |
| H  | -0.29775800 | 2.67881500  | -3.86424400 |
| C  | 0.82590300  | 2.38460700  | -0.14863600 |
| C  | 0.95503800  | 3.61887600  | -0.82977000 |
| H  | 0.67285700  | 4.60936500  | -2.76472800 |
| H  | 1.20690600  | 2.24772000  | 0.85299400  |
| O  | 0.21012700  | 0.11324400  | -0.16716600 |
| N  | 1.45511200  | 4.70781500  | -0.19910500 |
| C  | 1.67880400  | 5.97882700  | -0.89433600 |
| H  | 2.47865700  | 6.49816500  | -0.35807900 |
| H  | 2.06759900  | 5.77691200  | -1.89460500 |
| C  | 1.70296000  | 4.70638800  | 1.24626300  |
| H  | 1.58636400  | 5.73791700  | 1.59091600  |
| H  | 0.91598000  | 4.12731900  | 1.73786700  |
| N  | -2.68518200 | 0.64880300  | -2.92100400 |
| C  | -2.13522900 | 1.35937700  | -1.86878200 |
| H  | -2.18322900 | 0.87686500  | -0.89643500 |
| C  | -2.58450800 | 2.77589300  | -1.73773900 |
| C  | -2.44784800 | 3.41502400  | -0.49870300 |
| C  | -3.10116200 | 3.49015800  | -2.82419300 |
| C  | -2.79592500 | 4.75869600  | -0.35467900 |
| H  | -2.07439400 | 2.85434200  | 0.35196500  |
| C  | -3.44892000 | 4.83108600  | -2.68045900 |
| H  | -3.23127400 | 2.96916700  | -3.76656700 |
| C  | -3.28934900 | 5.47288300  | -1.44777700 |
| H  | -2.69063600 | 5.24326000  | 0.61171900  |
| H  | -3.85193700 | 5.37883800  | -3.52758500 |
| H  | -3.56540100 | 6.51754500  | -1.33727600 |
| C  | -0.80266600 | -5.01516600 | -3.05975700 |
| C  | -1.64516700 | -5.22530800 | -4.15691500 |
| C  | -2.44560500 | -4.18636900 | -4.63960300 |
| C  | -2.40400400 | -2.95066500 | -3.99922100 |
| C  | -1.58372500 | -2.73680100 | -2.86570200 |
| C  | -0.75951500 | -3.77648600 | -2.42127800 |
| H  | -0.17221100 | -5.81974400 | -2.69329400 |
| H  | -1.67200100 | -6.19409600 | -4.64562400 |
| H  | -3.08662700 | -4.33800200 | -5.50220300 |
| H  | -0.08748600 | -3.60862400 | -1.59342500 |
| S  | -3.24702800 | -1.46723700 | -4.40487000 |
| N  | -1.66139900 | -1.46930000 | -2.29222000 |

|   |             |             |             |
|---|-------------|-------------|-------------|
| C | -2.46135500 | -0.63405200 | -3.01629000 |
| C | 3.08750800  | 4.17752600  | 1.62620000  |
| H | 3.23186200  | 4.24933100  | 2.70860700  |
| H | 3.21314200  | 3.13397700  | 1.32977700  |
| H | 3.87234000  | 4.76381400  | 1.13793000  |
| C | 0.42102100  | 6.84930500  | -0.94956300 |
| H | 0.07273200  | 7.09100000  | 0.05951000  |
| H | 0.63063300  | 7.78842700  | -1.47110400 |
| H | -0.39354600 | 6.33416300  | -1.46483100 |
| C | -5.13901600 | -0.14413500 | 1.23917500  |
| C | -5.32370900 | 1.13348600  | 0.68994500  |
| C | -6.27119900 | -0.91483100 | 1.51133800  |
| C | -6.59236100 | 1.63388600  | 0.42622900  |
| H | -4.45207200 | 1.73070000  | 0.45172600  |
| C | -7.55779800 | -0.42934300 | 1.25259700  |
| H | -6.18193200 | -1.91395100 | 1.92085800  |
| C | -7.70567300 | 0.84297500  | 0.71541600  |
| H | -6.72025100 | 2.62059500  | -0.00441500 |
| H | -8.43059400 | -1.03711200 | 1.46315000  |
| C | -3.13153100 | 0.24919100  | 2.66512200  |
| C | -3.85915300 | 0.46494600  | 3.84213200  |
| C | -1.87997900 | 0.86590700  | 2.54713400  |
| C | -3.33947400 | 1.22368700  | 4.89110900  |
| H | -4.86360700 | 0.06651500  | 3.93560100  |
| C | -1.34187200 | 1.62935900  | 3.58211400  |
| H | -1.32310100 | 0.75125700  | 1.62657900  |
| C | -2.07572700 | 1.79424200  | 4.75415400  |
| H | -3.91342600 | 1.38498700  | 5.79670700  |
| H | -0.36743600 | 2.09512200  | 3.47849100  |
| C | 4.16972700  | 0.63933600  | -0.89754400 |
| C | 4.68341200  | 1.93362400  | -0.74236200 |
| C | 3.35749300  | 0.40005900  | -2.01498300 |
| C | 4.44462800  | 2.93514300  | -1.68049700 |
| H | 5.29412200  | 2.16240500  | 0.12255400  |
| C | 3.11247000  | 1.38388600  | -2.97278500 |
| H | 2.91229900  | -0.57527200 | -2.17377800 |
| C | 3.67596300  | 2.64494300  | -2.80367900 |
| H | 4.86270900  | 3.92676900  | -1.54856500 |
| H | 2.49725200  | 1.17158800  | -3.83866200 |
| C | 5.71954400  | -0.16579700 | 0.92977200  |
| C | 6.92725400  | -0.03971100 | 0.23099900  |
| C | 5.74364400  | -0.11727900 | 2.32443900  |
| C | 8.13519800  | 0.12567500  | 0.90557600  |
| H | 6.92924900  | -0.04608400 | -0.85414000 |

|    |             |             |             |
|----|-------------|-------------|-------------|
| C  | 6.94343000  | 0.04891100  | 3.01726000  |
| H  | 4.80208100  | -0.20485500 | 2.85279600  |
| C  | 8.13080300  | 0.16624800  | 2.29933200  |
| H  | 9.06720100  | 0.22828500  | 0.36135000  |
| H  | 6.95847800  | 0.08967400  | 4.10073700  |
| Cl | -9.32009600 | 1.46557900  | 0.38913400  |
| Cl | -1.40980100 | 2.75963900  | 6.06678800  |
| Cl | 9.64953600  | 0.37786300  | 3.16073500  |
| Cl | 3.42715500  | 3.88688800  | -4.02260800 |
| H  | -0.21894500 | 0.45486600  | -2.66630400 |

**5c'**

|    |             |            |             |
|----|-------------|------------|-------------|
| C  | -0.86696800 | 3.31474200 | -0.34537400 |
| C  | 0.14184000  | 4.21465400 | -0.77384800 |
| C  | -0.19879300 | 5.53716600 | -1.06563800 |
| C  | -1.50610800 | 6.00169800 | -0.93893900 |
| C  | -2.47799700 | 5.13315100 | -0.44731700 |
| C  | -2.17494700 | 3.80803100 | -0.12532200 |
| H  | 0.58485400  | 6.21446600 | -1.39644000 |
| H  | -3.49226500 | 5.48968300 | -0.28509300 |
| O  | -0.59660900 | 2.02679500 | -0.12493600 |
| C  | 1.58315900  | 3.78590900 | -0.91050200 |
| H  | 2.20625900  | 4.68577300 | -1.01483500 |
| H  | 1.73699700  | 3.19858200 | -1.82701400 |
| C  | 3.50074400  | 2.66945900 | 0.17241600  |
| C  | 1.81815400  | 3.60936200 | 1.53683100  |
| C  | 4.15902800  | 3.89068500 | 0.84530000  |
| H  | 3.77043700  | 2.58895400 | -0.88417900 |
| C  | 3.09424100  | 4.43334100 | 1.82919700  |
| H  | 1.66741000  | 2.84385800 | 2.29478800  |
| H  | 0.91561000  | 4.21649300 | 1.48775900  |
| H  | 5.09895600  | 3.63736100 | 1.33499400  |
| H  | 4.39683600  | 4.64137000 | 0.08495400  |
| H  | 3.40113800  | 4.30362600 | 2.86877900  |
| H  | 2.92127200  | 5.50072000 | 1.66698500  |
| N  | 2.04244800  | 2.94027200 | 0.22449800  |
| C  | 3.79729800  | 1.23893600 | 0.76765000  |
| O  | 2.95797200  | 0.32782800 | 0.14750500  |
| Zn | 1.19240600  | 0.95778700 | -0.36487700 |
| H  | -1.75307300 | 7.02991500 | -1.18054800 |
| C  | -3.21042100 | 2.95099100 | 0.55060200  |
| H  | -4.08523600 | 3.57286200 | 0.78338800  |
| H  | -2.82662500 | 2.58004300 | 1.50729300  |
| C  | -4.73366900 | 1.04117400 | 0.59875700  |

|    |             |             |             |
|----|-------------|-------------|-------------|
| C  | -4.28116500 | 2.13637000  | -1.50168500 |
| C  | -6.04815700 | 1.16476000  | -0.20350600 |
| H  | -4.84113000 | 1.61902100  | 1.52006000  |
| C  | -5.77376700 | 2.29929500  | -1.20440100 |
| H  | -4.12088700 | 1.35139500  | -2.23785000 |
| H  | -3.79627500 | 3.03429200  | -1.88222000 |
| H  | -6.28626900 | 0.23818200  | -0.72882200 |
| H  | -6.88820200 | 1.37726000  | 0.46068000  |
| H  | -6.38261000 | 2.23480200  | -2.11040300 |
| H  | -5.96952500 | 3.27425800  | -0.74406800 |
| N  | -3.65605400 | 1.73681400  | -0.21153100 |
| C  | -4.25768300 | -0.35471400 | 1.12881600  |
| O  | -2.96618400 | -0.18664800 | 1.63287700  |
| Zn | -1.86578600 | 0.45560600  | 0.17994000  |
| C  | -0.74783600 | -2.59299500 | -1.18071700 |
| C  | -0.44343200 | -3.93972200 | -1.38017600 |
| C  | 0.10402600  | -1.82975200 | -0.36964300 |
| C  | 0.69249700  | -4.52140000 | -0.82540400 |
| H  | -1.10111600 | -4.54766700 | -1.99382700 |
| C  | 1.25709300  | -2.39463200 | 0.18125500  |
| C  | 1.58081000  | -3.74488800 | -0.04107500 |
| H  | 0.90739300  | -5.56278300 | -1.03056200 |
| H  | 1.91158200  | -1.74439600 | 0.74303300  |
| O  | -0.16908600 | -0.52457500 | -0.12776200 |
| N  | 2.74608900  | -4.28855100 | 0.47520900  |
| C  | 2.92692800  | -5.72585100 | 0.60202100  |
| H  | 3.48741000  | -5.91500000 | 1.52552800  |
| H  | 1.95032300  | -6.20086500 | 0.74056700  |
| C  | 3.76549300  | -3.44039500 | 1.07627500  |
| H  | 4.73618100  | -3.92724600 | 0.92192300  |
| H  | 3.80911700  | -2.49921000 | 0.52354100  |
| N  | 0.96244600  | 0.35757600  | -2.68189900 |
| C  | 1.28849500  | -0.86780400 | -3.01404700 |
| H  | 0.56013700  | -1.45737700 | -3.57292100 |
| C  | 2.56395100  | -1.49634300 | -2.76992300 |
| C  | 2.66183300  | -2.88193800 | -3.00754500 |
| C  | 3.70994200  | -0.77548500 | -2.38726600 |
| C  | 3.87367700  | -3.53714900 | -2.83172600 |
| H  | 1.77402600  | -3.43393000 | -3.29533100 |
| C  | 4.92192400  | -1.43378600 | -2.22920800 |
| H  | 3.63859000  | 0.28793100  | -2.21531600 |
| C  | 5.00292200  | -2.81345200 | -2.44047600 |
| H  | 3.94161700  | -4.60565400 | -3.00001500 |
| H  | 5.80301100  | -0.87521900 | -1.93951700 |

|   |             |             |             |
|---|-------------|-------------|-------------|
| H | 5.95388300  | -3.32165000 | -2.30955800 |
| C | -4.48850500 | 1.10680300  | -5.00687800 |
| C | -4.23799100 | 2.48723900  | -5.09481200 |
| C | -3.02089400 | 3.02318300  | -4.67948300 |
| C | -2.06114600 | 2.15304600  | -4.16097100 |
| C | -2.31222500 | 0.76135900  | -4.03869000 |
| C | -3.53456900 | 0.24031700  | -4.48518800 |
| H | -5.43880900 | 0.71287200  | -5.35281500 |
| H | -4.99918500 | 3.14593600  | -5.50044000 |
| H | -2.82714400 | 4.08790900  | -4.75394000 |
| H | -3.70702600 | -0.82681600 | -4.41658800 |
| S | -0.45544900 | 2.50249000  | -3.56422400 |
| N | -1.29001200 | 0.02406900  | -3.46997700 |
| C | -0.26838500 | 0.77829400  | -3.18491300 |
| C | 3.54733000  | -3.18251700 | 2.57279000  |
| H | 4.35920300  | -2.57936300 | 2.99327500  |
| H | 2.60856100  | -2.65131400 | 2.74607700  |
| H | 3.51045500  | -4.12425200 | 3.13017200  |
| C | 3.66532200  | -6.36881700 | -0.57698400 |
| H | 4.64252700  | -5.89820200 | -0.72366200 |
| H | 3.82329700  | -7.43826400 | -0.39969800 |
| H | 3.09603700  | -6.25376700 | -1.50308900 |
| C | 5.24982400  | 0.82141000  | 0.45301200  |
| C | 5.69980900  | -0.38539000 | 1.00782000  |
| C | 6.11445000  | 1.50537500  | -0.40485000 |
| C | 6.95334700  | -0.90666000 | 0.71451300  |
| H | 5.04419900  | -0.92359300 | 1.67984200  |
| C | 7.38351300  | 1.00220000  | -0.71298700 |
| H | 5.82502700  | 2.44674000  | -0.85667700 |
| C | 7.79080000  | -0.20351400 | -0.15325500 |
| H | 7.28094700  | -1.84521200 | 1.14726700  |
| H | 8.04444500  | 1.54279300  | -1.38102600 |
| C | 3.60373200  | 1.17928800  | 2.30181600  |
| C | 4.52233500  | 1.73391300  | 3.20262700  |
| C | 2.49348200  | 0.50920200  | 2.82720700  |
| C | 4.31573200  | 1.67623700  | 4.57979700  |
| H | 5.43158500  | 2.19489300  | 2.83291700  |
| C | 2.26703500  | 0.43842400  | 4.20154400  |
| H | 1.80382100  | 0.02337800  | 2.14859900  |
| C | 3.17838000  | 1.03547700  | 5.06875100  |
| H | 5.03304300  | 2.10979300  | 5.26752600  |
| H | 1.39982300  | -0.08140300 | 4.59305000  |
| C | -4.22118200 | -1.51612400 | 0.11493100  |
| C | -3.91016900 | -2.78249300 | 0.64223400  |



|    |             |             |             |
|----|-------------|-------------|-------------|
| C  | -4.37917600 | -1.41190500 | -1.27014300 |
| C  | -3.80341800 | -3.90655000 | -0.16423400 |
| H  | -3.74644900 | -2.87340100 | 1.70991400  |
| C  | -4.28488300 | -2.53598000 | -2.09952000 |
| H  | -4.58991900 | -0.46303600 | -1.74074800 |
| C  | -4.00851600 | -3.77405800 | -1.53858400 |
| H  | -3.55818100 | -4.87352500 | 0.25907100  |
| H  | -4.43486300 | -2.44774100 | -3.16869200 |
| C  | -5.23343500 | -0.71175300 | 2.26135600  |
| C  | -6.50101000 | -1.24727200 | 2.00643500  |
| C  | -4.86671300 | -0.44742500 | 3.58248200  |
| C  | -7.39432600 | -1.50469600 | 3.04486100  |
| H  | -6.79199700 | -1.48555500 | 0.98833200  |
| C  | -5.74587100 | -0.70145800 | 4.63515600  |
| H  | -3.87383700 | -0.05420400 | 3.76653600  |
| C  | -7.00576100 | -1.22483300 | 4.35394000  |
| H  | -8.37428400 | -1.92368700 | 2.84606600  |
| H  | -5.45823100 | -0.50165500 | 5.66141100  |
| Cl | 9.37640400  | -0.85402600 | -0.54494100 |
| Cl | 2.90836900  | 0.95727700  | 6.80372900  |
| Cl | -8.12462800 | -1.54917300 | 5.67369000  |
| Cl | -3.89240200 | -5.19017500 | -2.57540900 |
| H  | -1.61927500 | -2.13407900 | -1.62943600 |

**TS-6c'**

|   |             |            |            |
|---|-------------|------------|------------|
| C | -1.00875100 | 3.16544700 | 1.22759500 |
| C | -0.05008000 | 4.11542100 | 1.65660500 |
| C | -0.46528100 | 5.42188200 | 1.92521200 |
| C | -1.79609400 | 5.80864000 | 1.78624300 |
| C | -2.74518500 | 4.84401900 | 1.45240800 |
| C | -2.38133900 | 3.51776700 | 1.20887200 |
| H | 0.27796600  | 6.14988100 | 2.24195300 |
| H | -3.79712100 | 5.11404400 | 1.40602400 |
| O | -0.62996500 | 1.93833200 | 0.85538100 |
| C | 1.42754300  | 3.79459200 | 1.78902700 |
| H | 1.85463700  | 4.46996100 | 2.54705200 |
| H | 1.94918600  | 4.02299600 | 0.84909800 |
| C | 3.15461400  | 2.09905100 | 2.30757100 |
| C | 1.05070100  | 1.96046100 | 3.37499600 |
| C | 3.42315200  | 2.44530400 | 3.78649200 |
| H | 3.71017700  | 2.74584800 | 1.62275500 |
| C | 2.07712400  | 2.19922200 | 4.50794500 |
| H | 0.78861400  | 0.90671600 | 3.30458400 |
| H | 0.12932900  | 2.52572300 | 3.50846100 |

|    |             |             |             |
|----|-------------|-------------|-------------|
| H  | 4.23854700  | 1.86291800  | 4.21461400  |
| H  | 3.71371700  | 3.49800800  | 3.86467500  |
| H  | 2.12790900  | 1.32841100  | 5.16449500  |
| H  | 1.79904300  | 3.05935700  | 5.12292000  |
| N  | 1.71156000  | 2.37592500  | 2.10628600  |
| C  | 3.47960800  | 0.63133200  | 1.82128800  |
| O  | 2.90449000  | 0.44694700  | 0.57985700  |
| Zn | 1.24346900  | 1.32947900  | 0.12628000  |
| H  | -2.09580000 | 6.83330200  | 1.97913700  |
| C  | -3.47420200 | 2.47507900  | 1.13682600  |
| H  | -4.44401600 | 2.98833500  | 1.19181800  |
| H  | -3.41012100 | 1.83269900  | 2.02238700  |
| C  | -4.62285200 | 0.53714000  | 0.19489500  |
| C  | -3.76194100 | 2.23203600  | -1.30682600 |
| C  | -5.60175400 | 0.71777200  | -0.98444000 |
| H  | -5.13599600 | 0.85749200  | 1.10547900  |
| C  | -5.27342100 | 2.12094300  | -1.52454900 |
| H  | -3.20716800 | 1.74134700  | -2.11055800 |
| H  | -3.39084600 | 3.25480900  | -1.24613400 |
| H  | -5.45320100 | -0.03868300 | -1.75707200 |
| H  | -6.63560400 | 0.62569200  | -0.64528200 |
| H  | -5.55468700 | 2.26207400  | -2.57136900 |
| H  | -5.79494500 | 2.88595500  | -0.93864200 |
| N  | -3.49604200 | 1.52642700  | -0.02567300 |
| C  | -4.07744700 | -0.89041500 | 0.58424300  |
| O  | -2.99369800 | -0.71292800 | 1.45450200  |
| Zn | -1.74157200 | 0.35200700  | 0.43184800  |
| C  | -0.00300600 | -0.47135800 | -2.76985700 |
| C  | 0.14389300  | -1.37665800 | -3.87955800 |
| C  | 0.25003500  | -1.03383000 | -1.46011900 |
| C  | 0.77205600  | -2.57471100 | -3.75558500 |
| H  | -0.17495500 | -1.04162700 | -4.86252500 |
| C  | 0.90118200  | -2.24884100 | -1.32951300 |
| C  | 1.20980200  | -3.03540200 | -2.46101500 |
| H  | 0.93994500  | -3.18290500 | -4.63189000 |
| H  | 1.12813900  | -2.57912900 | -0.32712100 |
| O  | -0.04843100 | -0.32180700 | -0.38834500 |
| N  | 1.87799600  | -4.20802800 | -2.33358800 |
| C  | 2.15741800  | -5.08034400 | -3.47603500 |
| H  | 2.26167200  | -6.09633100 | -3.08459100 |
| H  | 1.28689500  | -5.10202200 | -4.13540100 |
| C  | 2.39282900  | -4.64726800 | -1.03456200 |
| H  | 3.25555000  | -5.29085000 | -1.22880400 |
| H  | 2.77301500  | -3.77881600 | -0.49006500 |

|   |             |             |             |
|---|-------------|-------------|-------------|
| N | 1.24655200  | 1.80703700  | -2.00150900 |
| C | 1.37727800  | 0.84543900  | -3.00215500 |
| H | 0.97106500  | 1.20017500  | -3.94940700 |
| C | 2.66108900  | 0.12407400  | -3.22767900 |
| C | 2.96814700  | -0.20664600 | -4.55852300 |
| C | 3.55669900  | -0.25163900 | -2.21929500 |
| C | 4.13470000  | -0.89414800 | -4.88146700 |
| H | 2.28334200  | 0.08556100  | -5.35033600 |
| C | 4.72585300  | -0.94232700 | -2.54504600 |
| H | 3.37251500  | 0.00119900  | -1.18061700 |
| C | 5.01982000  | -1.27003000 | -3.86815500 |
| H | 4.35610700  | -1.12723800 | -5.91895700 |
| H | 5.41674400  | -1.20584900 | -1.75038700 |
| H | 5.93486500  | -1.80219800 | -4.11216700 |
| C | -3.41796300 | 5.05398000  | -3.80577500 |
| C | -3.02904500 | 6.06736300  | -2.91624200 |
| C | -1.86246100 | 5.94322600  | -2.16082900 |
| C | -1.10125200 | 4.78601700  | -2.30809900 |
| C | -1.49997500 | 3.73664700  | -3.17612200 |
| C | -2.66277000 | 3.89226300  | -3.94227200 |
| H | -4.32400900 | 5.17533000  | -4.39171200 |
| H | -3.63905100 | 6.95937200  | -2.81455400 |
| H | -1.56368500 | 6.71904600  | -1.46436000 |
| H | -2.96396900 | 3.09587800  | -4.61514900 |
| S | 0.39940500  | 4.33839700  | -1.52205500 |
| N | -0.71586000 | 2.59752500  | -3.13500200 |
| C | 0.29032300  | 2.73324800  | -2.29985700 |
| C | 1.34487400  | -5.39916100 | -0.20993100 |
| H | 1.76126300  | -5.69698400 | 0.75712400  |
| H | 0.46636100  | -4.77378700 | -0.03035400 |
| H | 1.01330700  | -6.30026000 | -0.73497900 |
| C | 3.42144800  | -4.66616900 | -4.23231600 |
| H | 4.29269800  | -4.69103800 | -3.57082400 |
| H | 3.60629600  | -5.34578600 | -5.07034400 |
| H | 3.33327200  | -3.64675900 | -4.61563100 |
| C | 5.00030100  | 0.43505600  | 1.65791400  |
| C | 5.41442000  | -0.78465100 | 1.10077100  |
| C | 5.98082800  | 1.37354700  | 1.98255700  |
| C | 6.75562800  | -1.06447300 | 0.87248100  |
| H | 4.65763300  | -1.51545200 | 0.83721000  |
| C | 7.33787700  | 1.11332700  | 1.75918600  |
| H | 5.71443100  | 2.33159700  | 2.41286400  |
| C | 7.71309900  | -0.10384100 | 1.20609700  |
| H | 7.06389500  | -2.01186100 | 0.44404600  |

|    |             |             |             |
|----|-------------|-------------|-------------|
| H  | 8.09046800  | 1.85155900  | 2.01213300  |
| C  | 2.97433100  | -0.46034700 | 2.79879800  |
| C  | 3.63103300  | -0.76993700 | 3.99631900  |
| C  | 1.84673500  | -1.21537300 | 2.45401900  |
| C  | 3.15231800  | -1.76108600 | 4.85287400  |
| H  | 4.54958600  | -0.25566000 | 4.25756900  |
| C  | 1.34943000  | -2.20936100 | 3.29634600  |
| H  | 1.35614200  | -1.02344800 | 1.50838800  |
| C  | 2.00505100  | -2.46798800 | 4.49784500  |
| H  | 3.66906400  | -1.99262100 | 5.77749700  |
| H  | 0.46676500  | -2.77695500 | 3.02174600  |
| C  | -3.57679200 | -1.79726100 | -0.55780900 |
| C  | -3.26178300 | -3.12071100 | -0.19542400 |
| C  | -3.28173000 | -1.39559900 | -1.86337200 |
| C  | -2.71603100 | -4.01776200 | -1.10170400 |
| H  | -3.45373600 | -3.43989600 | 0.82255000  |
| C  | -2.75028500 | -2.29278400 | -2.80021500 |
| H  | -3.46730200 | -0.38064000 | -2.19054600 |
| C  | -2.47766600 | -3.59613400 | -2.41210200 |
| H  | -2.48764200 | -5.03624500 | -0.80818100 |
| H  | -2.55444200 | -1.97352600 | -3.81563200 |
| C  | -5.24241300 | -1.58297100 | 1.30352100  |
| C  | -6.31634200 | -2.13708000 | 0.59774400  |
| C  | -5.26040800 | -1.61825200 | 2.69887800  |
| C  | -7.39626000 | -2.70921400 | 1.26754600  |
| H  | -6.30533400 | -2.14005700 | -0.48781900 |
| C  | -6.33134200 | -2.18968200 | 3.38637000  |
| H  | -4.41338000 | -1.20143900 | 3.23100000  |
| C  | -7.39253000 | -2.72728200 | 2.66158700  |
| H  | -8.22592400 | -3.14215900 | 0.72022700  |
| H  | -6.34295500 | -2.22260700 | 4.47013900  |
| Cl | 9.41538900  | -0.44510600 | 0.92213800  |
| Cl | 1.39438000  | -3.72317500 | 5.56878100  |
| Cl | -8.74887900 | -3.45113900 | 3.51769600  |
| Cl | -1.83881000 | -4.74927400 | -3.57741400 |
| H  | -0.80264800 | 0.26248300  | -2.83040000 |

**5d'**

|   |            |            |            |
|---|------------|------------|------------|
| C | 1.23412700 | 1.56107200 | 2.97668700 |
| C | 0.17017500 | 1.89342900 | 3.85801200 |
| C | 0.46539100 | 2.19382500 | 5.19104400 |
| C | 1.77289300 | 2.19680500 | 5.67344400 |
| C | 2.81726600 | 1.96505600 | 4.77866900 |
| C | 2.57033700 | 1.67504000 | 3.43639100 |

|    |             |             |             |
|----|-------------|-------------|-------------|
| H  | -0.35455000 | 2.44247500  | 5.86070500  |
| H  | 3.84793600  | 2.03324400  | 5.11819700  |
| O  | 1.00304700  | 1.17790300  | 1.72194100  |
| C  | -1.27863300 | 1.96854100  | 3.40460000  |
| H  | -1.82635700 | 2.60240900  | 4.11818000  |
| H  | -1.76591000 | 0.98299200  | 3.43955100  |
| C  | -2.82446100 | 2.64424600  | 1.57487800  |
| C  | -0.78378100 | 3.80282000  | 1.84409900  |
| C  | -3.21733600 | 4.05336200  | 2.06330000  |
| H  | -3.41927300 | 1.86076000  | 2.05269000  |
| C  | -1.88958200 | 4.84615200  | 2.12663000  |
| H  | -0.41851000 | 3.88754100  | 0.82327900  |
| H  | 0.06985200  | 3.89267700  | 2.51410400  |
| H  | -3.96024900 | 4.52574400  | 1.42102400  |
| H  | -3.66742200 | 3.97873700  | 3.05845700  |
| H  | -1.85872000 | 5.64358700  | 1.38182400  |
| H  | -1.75740000 | 5.30763200  | 3.10907000  |
| N  | -1.41699800 | 2.46487400  | 2.01358600  |
| C  | -2.93028500 | 2.33043000  | 0.02958300  |
| O  | -2.34780600 | 1.09030300  | -0.19380500 |
| Zn | -0.83042700 | 0.60145300  | 0.90349500  |
| H  | 1.97590800  | 2.42628100  | 6.71395100  |
| C  | 3.71308100  | 1.61437600  | 2.45610400  |
| H  | 4.63799800  | 1.91048600  | 2.96913400  |
| H  | 3.54453100  | 2.34764700  | 1.65975200  |
| C  | 5.09616500  | 0.41969500  | 0.82349800  |
| C  | 4.26322200  | -0.76360200 | 2.73883600  |
| C  | 6.30836100  | -0.24536000 | 1.52343600  |
| H  | 5.28899100  | 1.48688600  | 0.70394000  |
| C  | 5.78860600  | -0.70870300 | 2.90250100  |
| H  | 3.93493100  | -1.72280700 | 2.33850700  |
| H  | 3.71284300  | -0.59566500 | 3.66236100  |
| H  | 6.70364000  | -1.07388900 | 0.93638800  |
| H  | 7.12846900  | 0.46877500  | 1.62390300  |
| H  | 6.20230200  | -1.67238300 | 3.21408700  |
| H  | 6.05798600  | 0.01843500  | 3.67518600  |
| N  | 3.92190900  | 0.30080800  | 1.76500600  |
| C  | 4.69101900  | 0.00700400  | -0.63574600 |
| O  | 3.55171900  | 0.75664600  | -0.94432900 |
| Zn | 2.22705500  | 0.24448300  | 0.37109600  |
| C  | 0.68260300  | -2.80085200 | -0.64699100 |
| C  | 0.11010700  | -3.95112300 | -1.19810100 |
| C  | 0.03329700  | -1.57750600 | -0.84772900 |
| C  | -1.08090400 | -3.90607600 | -1.91177000 |

|   |             |             |             |
|---|-------------|-------------|-------------|
| H | 0.60352900  | -4.90880200 | -1.06108600 |
| C | -1.14381800 | -1.50546700 | -1.59284000 |
| C | -1.73886600 | -2.66717600 | -2.12884900 |
| H | -1.50331800 | -4.82946700 | -2.28430900 |
| H | -1.60799600 | -0.53382700 | -1.69307100 |
| O | 0.48403000  | -0.44778300 | -0.24369800 |
| N | -2.92646100 | -2.59228400 | -2.82914300 |
| C | -3.51403100 | -3.76497700 | -3.46256100 |
| H | -4.10038700 | -3.41745400 | -4.31999500 |
| H | -2.72048300 | -4.39431000 | -3.87925900 |
| C | -3.61595600 | -1.32329000 | -3.03484000 |
| H | -4.68600400 | -1.53969600 | -3.12514700 |
| H | -3.51524600 | -0.70386900 | -2.14407200 |
| N | -1.78109800 | -1.50867900 | 1.70087900  |
| C | -0.92505100 | -2.47310600 | 1.90173400  |
| H | -1.15297200 | -3.46226700 | 1.50731200  |
| C | 0.23832500  | -2.37996700 | 2.77056400  |
| C | 1.19477600  | -3.41309700 | 2.74212800  |
| C | 0.31560300  | -1.40684600 | 3.77869600  |
| C | 2.19454000  | -3.46991200 | 3.70621600  |
| H | 1.13025900  | -4.16970900 | 1.96698000  |
| C | 1.31987300  | -1.45958400 | 4.73975600  |
| H | -0.44948300 | -0.64613000 | 3.83639200  |
| C | 2.25150300  | -2.49962200 | 4.71284700  |
| H | 2.92149900  | -4.27584100 | 3.68478600  |
| H | 1.36554000  | -0.69550000 | 5.50825400  |
| H | 3.02458600  | -2.55434700 | 5.47358700  |
| C | -6.73050100 | -4.57043000 | 0.40125600  |
| C | -7.30731800 | -3.40107700 | -0.12921100 |
| C | -6.60950400 | -2.19614500 | -0.13833700 |
| C | -5.31967000 | -2.18485100 | 0.39844900  |
| C | -4.72228400 | -3.35789300 | 0.92245600  |
| C | -5.44567400 | -4.55981900 | 0.92912300  |
| H | -7.29916300 | -5.49507500 | 0.39321000  |
| H | -8.31258700 | -3.43726000 | -0.53736200 |
| H | -7.05332400 | -1.29439400 | -0.54724500 |
| H | -4.98714900 | -5.45561000 | 1.33397000  |
| S | -4.19298600 | -0.85354600 | 0.49246800  |
| N | -3.43965100 | -3.18773900 | 1.40037500  |
| C | -3.02723300 | -1.96022200 | 1.22924800  |
| C | -3.11981900 | -0.56530200 | -4.26967800 |
| H | -3.68024000 | 0.36591200  | -4.40767300 |
| H | -2.06027100 | -0.31478800 | -4.16584700 |
| H | -3.23798000 | -1.16738800 | -5.17654200 |

|   |             |             |             |
|---|-------------|-------------|-------------|
| C | -4.40597500 | -4.57138700 | -2.51523800 |
| H | -5.22967600 | -3.95744000 | -2.14167600 |
| H | -4.82977800 | -5.44358600 | -3.02520800 |
| H | -3.83805800 | -4.91818800 | -1.64865200 |
| C | -4.40531400 | 2.21298600  | -0.40611500 |
| C | -4.62996200 | 1.85953000  | -1.74463300 |
| C | -5.50644100 | 2.28148400  | 0.44856900  |
| C | -5.89725900 | 1.53355600  | -2.21017800 |
| H | -3.78207900 | 1.80438500  | -2.41763000 |
| C | -6.79281300 | 1.96192900  | 0.00142800  |
| H | -5.38734300 | 2.54847600  | 1.49168800  |
| C | -6.97322100 | 1.57425500  | -1.32085300 |
| H | -6.05374600 | 1.23936700  | -3.24194100 |
| H | -7.63828300 | 1.99771400  | 0.67897200  |
| C | -2.24601200 | 3.39448600  | -0.85626000 |
| C | -2.79428200 | 4.66601000  | -1.06641100 |
| C | -1.05135200 | 3.07528500  | -1.51194800 |
| C | -2.13848100 | 5.61909400  | -1.84364100 |
| H | -3.75985100 | 4.91589500  | -0.64047900 |
| C | -0.37880400 | 4.01371900  | -2.29453000 |
| H | -0.65496200 | 2.07135100  | -1.41865100 |
| C | -0.92288600 | 5.28750100  | -2.44022300 |
| H | -2.56825800 | 6.60266000  | -1.99653700 |
| H | 0.54975400  | 3.75581300  | -2.79156200 |
| C | 4.37551500  | -1.48628300 | -0.88833600 |
| C | 3.69971000  | -1.75772800 | -2.09146200 |
| C | 4.70206800  | -2.57403200 | -0.07042700 |
| C | 3.37094200  | -3.05199900 | -2.47290600 |
| H | 3.41964400  | -0.91896300 | -2.71741600 |
| C | 4.36574900  | -3.88438700 | -0.42915900 |
| H | 5.23880800  | -2.43718400 | 0.85596900  |
| C | 3.71097600  | -4.11233400 | -1.63240800 |
| H | 2.83851700  | -3.24001600 | -3.39760200 |
| H | 4.62252100  | -4.71520000 | 0.21852900  |
| C | 5.86244700  | 0.42837200  | -1.53658300 |
| C | 6.94801800  | -0.41254800 | -1.80339000 |
| C | 5.86509500  | 1.71979500  | -2.07235400 |
| C | 8.02506500  | 0.02544900  | -2.57362500 |
| H | 6.94984400  | -1.43076000 | -1.42831700 |
| C | 6.93159000  | 2.17443300  | -2.84565500 |
| H | 5.00531900  | 2.35273500  | -1.88662700 |
| C | 8.00715300  | 1.32094900  | -3.08485400 |
| H | 8.86239600  | -0.63059900 | -2.78292900 |
| H | 6.92908900  | 3.17459000  | -3.26455100 |

|    |             |             |             |
|----|-------------|-------------|-------------|
| Cl | -8.57759300 | 1.11671600  | -1.88182200 |
| Cl | -0.08362900 | 6.48568600  | -3.41507900 |
| Cl | 9.35990400  | 1.88384700  | -4.05959200 |
| Cl | 3.28650800  | -5.75563100 | -2.08846600 |
| H  | 1.61071300  | -2.83793600 | -0.08930500 |

**TS-6d'**

|    |             |             |             |
|----|-------------|-------------|-------------|
| C  | 1.09837000  | 1.00129400  | 3.09523700  |
| C  | -0.01700200 | 1.08216400  | 3.97181700  |
| C  | 0.20374600  | 1.07570500  | 5.35195300  |
| C  | 1.48563700  | 1.00788400  | 5.89304900  |
| C  | 2.57761000  | 1.01350000  | 5.02742400  |
| C  | 2.40625400  | 1.03535600  | 3.64247200  |
| H  | -0.65661000 | 1.13429400  | 6.01432600  |
| H  | 3.58803100  | 1.02034300  | 5.42868700  |
| O  | 0.93193200  | 0.92268000  | 1.77139000  |
| C  | -1.45040000 | 1.19694900  | 3.47843400  |
| H  | -2.05429800 | 1.63625900  | 4.28658200  |
| H  | -1.88254100 | 0.20555600  | 3.27895000  |
| C  | -2.96030300 | 2.19798000  | 1.77215400  |
| C  | -0.98700500 | 3.34562600  | 2.37492500  |
| C  | -3.43589200 | 3.44566800  | 2.54251800  |
| H  | -3.52891100 | 1.30506800  | 2.04111800  |
| C  | -2.15103000 | 4.26297900  | 2.81915000  |
| H  | -0.58505700 | 3.66145700  | 1.41502200  |
| H  | -0.16626600 | 3.32108000  | 3.09014800  |
| H  | -4.18896200 | 4.01385300  | 1.99685800  |
| H  | -3.90123400 | 3.13342000  | 3.48311100  |
| H  | -2.13651400 | 5.19646700  | 2.25345300  |
| H  | -2.07176100 | 4.51894800  | 3.87928500  |
| N  | -1.56329900 | 1.98092000  | 2.22367800  |
| C  | -3.00421900 | 2.23775400  | 0.18931700  |
| O  | -2.32632800 | 1.13023200  | -0.29809700 |
| Zn | -0.87750800 | 0.40668600  | 0.80160700  |
| H  | 1.63090000  | 0.99569500  | 6.96791500  |
| C  | 3.61044600  | 1.19644500  | 2.74910000  |
| H  | 4.50096500  | 1.34469700  | 3.37454300  |
| H  | 3.50018900  | 2.10155400  | 2.14020000  |
| C  | 5.07929400  | 0.35264700  | 0.96230300  |
| C  | 4.09535200  | -1.20204200 | 2.49638500  |
| C  | 6.23394500  | -0.47376800 | 1.58414700  |
| H  | 5.29502300  | 1.41757700  | 1.06366100  |
| C  | 5.60529300  | -1.24579200 | 2.76715600  |
| H  | 3.78132800  | -2.02336200 | 1.85499200  |



|    |             |             |             |
|----|-------------|-------------|-------------|
| H  | 3.48173900  | -1.24305000 | 3.39290700  |
| H  | 6.69029900  | -1.13848900 | 0.85071300  |
| H  | 7.03416800  | 0.18881700  | 1.92126700  |
| H  | 5.97288200  | -2.27263900 | 2.85275200  |
| H  | 5.83560600  | -0.74595700 | 3.71333800  |
| N  | 3.85011400  | 0.07528200  | 1.78627800  |
| C  | 4.74289000  | 0.24422300  | -0.56963000 |
| O  | 3.66896000  | 1.11477800  | -0.78027500 |
| Zn | 2.25801400  | 0.40790600  | 0.34586700  |
| C  | 0.56075200  | -2.49457400 | -0.80715000 |
| C  | 0.05539700  | -3.61530600 | -1.57274000 |
| C  | 0.12050900  | -1.18893800 | -1.24768800 |
| C  | -1.03512600 | -3.49891700 | -2.37530900 |
| H  | 0.51130300  | -4.58972800 | -1.43045600 |
| C  | -0.98493200 | -1.06266800 | -2.06614800 |
| C  | -1.66342700 | -2.20710900 | -2.54944400 |
| H  | -1.45427500 | -4.37833400 | -2.84354000 |
| H  | -1.38254800 | -0.06809500 | -2.20384300 |
| O  | 0.60861500  | -0.11311000 | -0.65405600 |
| N  | -2.87166100 | -2.09426600 | -3.13830400 |
| C  | -3.58811500 | -3.24549700 | -3.69888900 |
| H  | -4.25675600 | -2.85360300 | -4.47071900 |
| H  | -2.87842200 | -3.89640700 | -4.21591900 |
| C  | -3.59665700 | -0.81372000 | -3.15656000 |
| H  | -4.66275100 | -1.04930600 | -3.09594500 |
| H  | -3.35807200 | -0.25454500 | -2.25137100 |
| N  | -1.38265300 | -1.67979000 | 1.04858600  |
| C  | -0.42049800 | -2.66951000 | 0.91118100  |
| H  | -0.86151300 | -3.63792600 | 0.68865700  |
| C  | 0.62441200  | -2.82038000 | 1.96901600  |
| C  | 1.61826200  | -3.80829800 | 1.85340600  |
| C  | 0.48177700  | -2.15875100 | 3.19299300  |
| C  | 2.42535100  | -4.13470700 | 2.93920600  |
| H  | 1.73798900  | -4.34618400 | 0.91756600  |
| C  | 1.30186500  | -2.47007400 | 4.27803100  |
| H  | -0.31367800 | -1.43678800 | 3.30314900  |
| C  | 2.26804500  | -3.46810200 | 4.15899300  |
| H  | 3.17409200  | -4.91491600 | 2.83774800  |
| H  | 1.17395500  | -1.93202000 | 5.21166000  |
| H  | 2.89647800  | -3.72619800 | 5.00607700  |
| C  | -6.41714400 | -4.84473800 | 0.59216200  |
| C  | -7.12945000 | -3.66462400 | 0.32702500  |
| C  | -6.47692100 | -2.43083100 | 0.30465200  |
| C  | -5.10506800 | -2.40708200 | 0.54975000  |

|   |             |             |             |
|---|-------------|-------------|-------------|
| C | -4.37044800 | -3.59091900 | 0.80842500  |
| C | -5.04613200 | -4.81861400 | 0.83549900  |
| H | -6.94407700 | -5.79422000 | 0.60639000  |
| H | -8.19736600 | -3.70948900 | 0.13710100  |
| H | -7.01969500 | -1.51444900 | 0.09304700  |
| H | -4.48789900 | -5.72727700 | 1.03586600  |
| S | -4.01074000 | -1.03830200 | 0.49961300  |
| N | -3.01549100 | -3.41447100 | 1.00257900  |
| C | -2.66030500 | -2.15676600 | 0.88235400  |
| C | -3.29649000 | 0.00103200  | -4.41450700 |
| H | -3.88408800 | 0.92330100  | -4.41571100 |
| H | -2.23759600 | 0.27037100  | -4.46139900 |
| H | -3.54484600 | -0.55940800 | -5.32161400 |
| C | -4.38141400 | -4.01694700 | -2.64439100 |
| H | -5.11565100 | -3.37482400 | -2.15153200 |
| H | -4.91389900 | -4.85349300 | -3.10734000 |
| H | -3.72244100 | -4.41050100 | -1.86795300 |
| C | -4.46380800 | 2.13676800  | -0.30628600 |
| C | -4.65865300 | 2.14029600  | -1.69492800 |
| C | -5.57913000 | 1.92941300  | 0.50808300  |
| C | -5.90697700 | 1.90703400  | -2.25974300 |
| H | -3.80322600 | 2.31229500  | -2.33887200 |
| C | -6.84496700 | 1.69125600  | -0.03703000 |
| H | -5.48697300 | 1.92065800  | 1.58713200  |
| C | -6.99538000 | 1.66974900  | -1.41858000 |
| H | -6.04219900 | 1.90542200  | -3.33572700 |
| H | -7.69990200 | 1.51912200  | 0.60718400  |
| C | -2.38415900 | 3.52562200  | -0.39905800 |
| C | -3.03088100 | 4.76711900  | -0.35792900 |
| C | -1.14249700 | 3.45047400  | -1.04056900 |
| C | -2.43275500 | 5.91465700  | -0.87650200 |
| H | -4.02874800 | 4.84362600  | 0.06001800  |
| C | -0.52605400 | 4.58566400  | -1.56622200 |
| H | -0.66671500 | 2.48162300  | -1.13551900 |
| C | -1.17349500 | 5.81487400  | -1.46555500 |
| H | -2.93986500 | 6.87215300  | -0.83674100 |
| H | 0.43955400  | 4.51610500  | -2.05487600 |
| C | 4.34383500  | -1.15845900 | -1.09727200 |
| C | 3.57613900  | -1.16467700 | -2.27583000 |
| C | 4.68781000  | -2.39859400 | -0.54433100 |
| C | 3.16915500  | -2.34800000 | -2.88254200 |
| H | 3.29134200  | -0.20825400 | -2.69734500 |
| C | 4.27342100  | -3.59999100 | -1.12892900 |
| H | 5.29276400  | -2.46387000 | 0.34767300  |

|    |             |             |             |
|----|-------------|-------------|-------------|
| C  | 3.52326200  | -3.56416800 | -2.29841100 |
| H  | 2.57200100  | -2.33116500 | -3.78687700 |
| H  | 4.54251300  | -4.55038300 | -0.68184300 |
| C  | 5.98296100  | 0.73815200  | -1.32822400 |
| C  | 7.02266900  | -0.11299200 | -1.71728700 |
| C  | 6.09764600  | 2.10538200  | -1.59968900 |
| C  | 8.16250600  | 0.38467800  | -2.34874000 |
| H  | 6.94152900  | -1.18193600 | -1.55019200 |
| C  | 7.22840600  | 2.62048800  | -2.23011400 |
| H  | 5.27407500  | 2.75318900  | -1.32367300 |
| C  | 8.25562100  | 1.75206800  | -2.59544700 |
| H  | 8.96373000  | -0.27907700 | -2.65334100 |
| H  | 7.31261800  | 3.68036100  | -2.44302800 |
| Cl | -8.57637300 | 1.34327400  | -2.11775700 |
| Cl | -0.40722700 | 7.25745700  | -2.11766200 |
| Cl | 9.68804800  | 2.39079200  | -3.39283500 |
| Cl | 3.00228700  | -5.07160200 | -3.03831300 |
| H  | 1.58654900  | -2.55345200 | -0.46137700 |

7'

|   |             |             |             |
|---|-------------|-------------|-------------|
| C | 0.23506200  | -3.78760500 | -0.12671000 |
| C | -0.95612200 | -4.45881100 | -0.50902900 |
| C | -0.90068900 | -5.82686300 | -0.78935600 |
| C | 0.28858600  | -6.54867600 | -0.73852700 |
| C | 1.45857800  | -5.87950100 | -0.39756100 |
| C | 1.45111800  | -4.51599200 | -0.08868400 |
| H | -1.82203000 | -6.33145100 | -1.06798300 |
| H | 2.40337700  | -6.41633600 | -0.36750200 |
| O | 0.23504400  | -2.47574100 | 0.17209700  |
| C | -2.28973700 | -3.76501800 | -0.70078400 |
| H | -3.06448700 | -4.54126800 | -0.77077400 |
| H | -2.29400500 | -3.23345300 | -1.65808300 |
| C | -3.92813700 | -2.13298900 | 0.17316400  |
| C | -2.70333200 | -3.43093800 | 1.68498300  |
| C | -4.92187400 | -3.20584100 | 0.65109400  |
| H | -4.02230800 | -1.92059400 | -0.89302200 |
| C | -4.17409500 | -3.91276200 | 1.81081700  |
| H | -2.47168000 | -2.68466700 | 2.44309700  |
| H | -1.97043500 | -4.23523100 | 1.75856800  |
| H | -5.88294100 | -2.79931800 | 0.95980800  |
| H | -5.11945800 | -3.90736500 | -0.16582700 |
| H | -4.58634400 | -3.62643600 | 2.78036900  |
| H | -4.25044800 | -5.00011300 | 1.72570000  |
| N | -2.60066500 | -2.77974400 | 0.35531600  |

|    |             |             |             |
|----|-------------|-------------|-------------|
| C  | -3.95041600 | -0.72136500 | 0.94115400  |
| O  | -2.65979400 | -0.23683400 | 1.09625100  |
| Zn | -1.31323500 | -1.04239100 | -0.05752100 |
| H  | 0.30201400  | -7.60915300 | -0.96584500 |
| C  | 2.76053000  | -3.85156800 | 0.25473200  |
| H  | 3.56038500  | -4.60274800 | 0.21614800  |
| H  | 2.76264800  | -3.46113500 | 1.28079000  |
| C  | 4.49653500  | -2.17761100 | -0.30988800 |
| C  | 3.12779000  | -3.11227500 | -2.07432100 |
| C  | 5.33923200  | -2.37536300 | -1.58661500 |
| H  | 4.88795400  | -2.81924100 | 0.48485600  |
| C  | 4.58662600  | -3.45440400 | -2.37354400 |
| H  | 2.79121500  | -2.28474600 | -2.70466900 |
| H  | 2.43134300  | -3.93681300 | -2.22379900 |
| H  | 5.37346500  | -1.44794500 | -2.16641900 |
| H  | 6.36601900  | -2.65716700 | -1.34767100 |
| H  | 4.81040700  | -3.44435500 | -3.44351900 |
| H  | 4.82863900  | -4.45272600 | -1.99151500 |
| N  | 3.11141400  | -2.69445600 | -0.64065500 |
| C  | 4.47262400  | -0.73408100 | 0.33437800  |
| O  | 3.40935000  | -0.65591000 | 1.23838400  |
| Zn | 1.79332900  | -1.26349200 | 0.39668700  |
| C  | -0.08501000 | 2.01620700  | -0.99439900 |
| C  | 0.42608700  | 3.33581800  | -1.40120100 |
| C  | 0.62380300  | 1.42993100  | 0.16839300  |
| C  | 1.32936200  | 4.02966100  | -0.68129000 |
| H  | -0.00671800 | 3.77601900  | -2.29333500 |
| C  | 1.52664800  | 2.15827200  | 0.91673800  |
| C  | 1.88297100  | 3.47206700  | 0.53969100  |
| H  | 1.62623600  | 5.01509600  | -1.00848400 |
| H  | 2.02159600  | 1.64936500  | 1.73012900  |
| O  | 0.37988800  | 0.17334400  | 0.44720500  |
| N  | 2.72942900  | 4.19722400  | 1.29784000  |
| C  | 3.20111400  | 5.52695600  | 0.89558000  |
| H  | 4.17529400  | 5.67549800  | 1.37033200  |
| H  | 3.38352100  | 5.53207300  | -0.18084300 |
| C  | 3.14237600  | 3.74279900  | 2.63414000  |
| H  | 3.34957100  | 4.64281600  | 3.21993500  |
| H  | 2.29118000  | 3.24929300  | 3.11029500  |
| N  | -2.41955000 | 1.76946200  | -1.93490200 |
| C  | -1.70679300 | 2.08083100  | -0.73539100 |
| H  | -1.91493900 | 1.35359900  | 0.05723600  |
| C  | -2.06022100 | 3.45026900  | -0.19916600 |
| C  | -1.74746200 | 3.76763900  | 1.12695500  |

|   |             |             |             |
|---|-------------|-------------|-------------|
| C | -2.65717400 | 4.41781700  | -1.01105900 |
| C | -2.00355800 | 5.04386900  | 1.62841000  |
| H | -1.30610000 | 3.00887700  | 1.76692600  |
| C | -2.91882700 | 5.69287200  | -0.50974300 |
| H | -2.93420900 | 4.13845700  | -2.02119300 |
| C | -2.58649600 | 6.01349800  | 0.80861700  |
| H | -1.76273200 | 5.27750800  | 2.66183500  |
| H | -3.39272100 | 6.43463100  | -1.14629900 |
| H | -2.79541700 | 7.00509500  | 1.19964900  |
| C | -0.32294200 | -3.30964300 | -4.18935200 |
| C | -1.19071400 | -3.15023100 | -5.27341500 |
| C | -2.08994700 | -2.07829000 | -5.30393900 |
| C | -2.11664600 | -1.18646100 | -4.23638400 |
| C | -1.27036400 | -1.36229000 | -3.11386200 |
| C | -0.35087500 | -2.41723200 | -3.11668800 |
| H | 0.38075000  | -4.13682700 | -4.17387600 |
| H | -1.16283800 | -3.85058700 | -6.10213300 |
| H | -2.75050800 | -1.93828500 | -6.15385000 |
| H | 0.31668600  | -2.53918200 | -2.27500600 |
| S | -3.08729400 | 0.26768700  | -4.03639500 |
| N | -1.42096500 | -0.42950100 | -2.09213600 |
| C | -2.24115400 | 0.61284300  | -2.46986200 |
| C | 4.36506600  | 2.82431000  | 2.62480900  |
| H | 4.66532000  | 2.59898100  | 3.65266600  |
| H | 4.15761700  | 1.88017500  | 2.11827800  |
| H | 5.21063300  | 3.30612500  | 2.12454500  |
| C | 2.23098800  | 6.63832900  | 1.30255000  |
| H | 2.10399900  | 6.66376400  | 2.38913300  |
| H | 2.61111600  | 7.61286300  | 0.98173500  |
| H | 1.24547200  | 6.48207600  | 0.85542400  |
| C | -4.76573300 | 0.31431900  | 0.13170100  |
| C | -4.71767000 | 1.63291400  | 0.60787100  |
| C | -5.49556400 | 0.06376500  | -1.03106100 |
| C | -5.33178700 | 2.67655000  | -0.06874800 |
| H | -4.15228200 | 1.84009500  | 1.50864000  |
| C | -6.11557500 | 1.10208300  | -1.73485500 |
| H | -5.59199000 | -0.93880400 | -1.43142100 |
| C | -6.01567400 | 2.39956200  | -1.25217800 |
| H | -5.25518800 | 3.69420300  | 0.29422300  |
| H | -6.65454000 | 0.89980900  | -2.65318400 |
| C | -4.61236800 | -0.82291900 | 2.33537300  |
| C | -6.00067100 | -0.89691300 | 2.50506200  |
| C | -3.80971400 | -0.78448300 | 3.47813600  |
| C | -6.57240100 | -1.00221000 | 3.77174900  |

|    |             |             |             |
|----|-------------|-------------|-------------|
| H  | -6.65153800 | -0.84411000 | 1.63817800  |
| C  | -4.35944500 | -0.88532700 | 4.75579600  |
| H  | -2.74315900 | -0.65243900 | 3.34018900  |
| C  | -5.74013300 | -1.00832800 | 4.88961700  |
| H  | -7.64797100 | -1.06350300 | 3.89355100  |
| H  | -3.72871900 | -0.85965700 | 5.63767200  |
| C  | 4.29945500  | 0.41236900  | -0.69491200 |
| C  | 5.00128700  | 1.61750500  | -0.57615200 |
| C  | 3.31622700  | 0.34679800  | -1.69592100 |
| C  | 4.74970500  | 2.70342100  | -1.41500700 |
| H  | 5.76272000  | 1.72009600  | 0.18547100  |
| C  | 3.05059500  | 1.41407800  | -2.55025100 |
| H  | 2.73865800  | -0.55762300 | -1.84447000 |
| C  | 3.77832800  | 2.59272000  | -2.40366000 |
| H  | 5.30968700  | 3.62543800  | -1.30372600 |
| H  | 2.29051100  | 1.33004600  | -3.31841400 |
| C  | 5.80419100  | -0.60169900 | 1.08994000  |
| C  | 7.03796800  | -0.50625800 | 0.43180500  |
| C  | 5.79401600  | -0.61387600 | 2.48654800  |
| C  | 8.23224700  | -0.42413800 | 1.14525800  |
| H  | 7.07536200  | -0.46800400 | -0.65136800 |
| C  | 6.97918000  | -0.53188200 | 3.21817500  |
| H  | 4.83541200  | -0.68044800 | 2.98586100  |
| C  | 8.19087900  | -0.43848800 | 2.53876200  |
| H  | 9.18276200  | -0.34368600 | 0.63012800  |
| H  | 6.96428700  | -0.53941200 | 4.30239800  |
| Cl | -6.75485100 | 3.72290800  | -2.14967300 |
| Cl | -6.44880500 | -1.14374900 | 6.49630600  |
| Cl | 9.69125200  | -0.32829600 | 3.44819000  |
| Cl | 3.46441300  | 3.95144600  | -3.46952000 |
| H  | -0.00305700 | 1.28082300  | -1.80297700 |

**8'**

|   |             |            |            |
|---|-------------|------------|------------|
| C | 0.00337600  | 2.77911000 | 2.59026600 |
| C | 1.20629300  | 3.40884600 | 2.99667600 |
| C | 1.13413500  | 4.55769600 | 3.79498100 |
| C | -0.08015600 | 5.12300500 | 4.16754700 |
| C | -1.25902200 | 4.51627500 | 3.73895300 |
| C | -1.23539700 | 3.35595800 | 2.96518600 |
| H | 2.06325100  | 5.02638400 | 4.10994300 |
| H | -2.22101200 | 4.93903100 | 4.01735100 |
| O | 0.00218100  | 1.66822800 | 1.83278700 |
| C | 2.58333100  | 3.01680900 | 2.49791000 |
| H | 3.32833400  | 3.41738000 | 3.20112000 |

|    |             |             |             |
|----|-------------|-------------|-------------|
| H  | 2.77157000  | 3.51889900  | 1.53826300  |
| C  | 4.20254500  | 1.31729200  | 1.79130400  |
| C  | 2.62245600  | 0.76537500  | 3.50161400  |
| C  | 5.01251600  | 1.15699800  | 3.09142400  |
| H  | 4.51252100  | 2.19731300  | 1.22252100  |
| C  | 4.02754600  | 0.54171500  | 4.10979800  |
| H  | 2.16426300  | -0.18805400 | 3.23560800  |
| H  | 1.93711800  | 1.29110500  | 4.16811800  |
| H  | 5.90240000  | 0.54241200  | 2.96220200  |
| H  | 5.34947800  | 2.14210300  | 3.43097900  |
| H  | 4.21591300  | -0.52603300 | 4.23610700  |
| H  | 4.12299400  | 1.01319700  | 5.09111400  |
| N  | 2.80676400  | 1.57213500  | 2.26095700  |
| C  | 4.23070800  | 0.13097100  | 0.74424500  |
| O  | 3.13507000  | 0.25081900  | -0.09677600 |
| Zn | 1.52447900  | 1.03649900  | 0.56413700  |
| H  | -0.10767800 | 6.01704500  | 4.78100500  |
| C  | -2.52684900 | 2.68280700  | 2.59569800  |
| H  | -3.34862300 | 3.16111100  | 3.14473600  |
| H  | -2.49711200 | 1.63376800  | 2.90411000  |
| C  | -4.16924000 | 1.88310800  | 0.99472500  |
| C  | -3.09612700 | 3.99222800  | 0.55046000  |
| C  | -5.25747400 | 2.90237200  | 0.58381800  |
| H  | -4.41270300 | 1.51775000  | 1.99383800  |
| C  | -4.58739800 | 4.28109600  | 0.75916200  |
| H  | -2.84297700 | 3.95880000  | -0.51260000 |
| H  | -2.42564400 | 4.71421300  | 1.01766900  |
| H  | -5.60124600 | 2.74881000  | -0.43841300 |
| H  | -6.13861100 | 2.79264700  | 1.21987700  |
| H  | -4.96574700 | 5.03510400  | 0.06343200  |
| H  | -4.75885000 | 4.65968500  | 1.77262700  |
| N  | -2.86685200 | 2.64351400  | 1.13247900  |
| C  | -3.93955300 | 0.54797700  | 0.21290100  |
| O  | -2.81211700 | -0.03803300 | 0.80529900  |
| Zn | -1.38502000 | 1.21123200  | 0.36672200  |
| C  | -0.05358500 | -2.11789400 | -1.10939300 |
| C  | -0.66461700 | -3.14199300 | -1.84277000 |
| C  | -0.52724700 | -1.92760000 | 0.18304400  |
| C  | -1.67980900 | -3.92718100 | -1.32055000 |
| H  | -0.31878900 | -3.31844100 | -2.85635900 |
| C  | -1.50338500 | -2.72683600 | 0.76174900  |
| C  | -2.12664900 | -3.74349000 | 0.01161100  |
| H  | -2.12085300 | -4.69242500 | -1.94499600 |
| H  | -1.84980400 | -2.47996600 | 1.75561200  |

|   |             |             |             |
|---|-------------|-------------|-------------|
| O | -0.02210200 | -0.83487300 | 0.91000600  |
| N | -3.13783500 | -4.52705300 | 0.55206000  |
| C | -4.10975300 | -5.16249500 | -0.33869600 |
| H | -3.58308500 | -5.74807700 | -1.09763800 |
| H | -4.66607100 | -5.89007800 | 0.25905200  |
| C | -3.55557700 | -4.31398500 | 1.93520600  |
| H | -3.66757900 | -3.24409100 | 2.14686700  |
| H | -4.55606600 | -4.73961800 | 2.04453500  |
| N | 0.45019000  | -0.26469100 | -2.62132000 |
| C | 1.02186700  | -1.24133400 | -1.70849300 |
| H | 1.56752900  | -0.75754400 | -0.89786900 |
| C | 2.11349000  | -2.04444200 | -2.41021100 |
| C | 2.69892100  | -3.13230200 | -1.74918300 |
| C | 2.62872400  | -1.64504500 | -3.64448500 |
| C | 3.78830300  | -3.79877100 | -2.30521900 |
| H | 2.30945100  | -3.44674400 | -0.78701600 |
| C | 3.71669200  | -2.31733200 | -4.20723200 |
| H | 2.17320800  | -0.80129100 | -4.14931800 |
| C | 4.30355100  | -3.39221700 | -3.53918400 |
| H | 4.23868000  | -4.63111100 | -1.77251700 |
| H | 4.10811100  | -1.99467600 | -5.16788600 |
| H | 5.15360000  | -3.91003000 | -3.97380200 |
| C | -0.00396100 | 5.37959600  | -0.68587200 |
| C | -0.40872500 | 5.72368500  | -1.97524400 |
| C | -0.54764900 | 4.73082300  | -2.94897300 |
| C | -0.29774000 | 3.40378100  | -2.60830200 |
| C | 0.05906700  | 3.03747400  | -1.29279200 |
| C | 0.23351000  | 4.04507800  | -0.34284700 |
| H | 0.13059100  | 6.14650800  | 0.07045300  |
| H | -0.59656000 | 6.76109800  | -2.23269100 |
| H | -0.82880200 | 4.98799200  | -3.96516600 |
| H | 0.53632300  | 3.81429400  | 0.66574300  |
| S | -0.32288100 | 2.00985200  | -3.66410400 |
| N | 0.18942000  | 1.63368800  | -1.06228600 |
| C | 0.17516000  | 0.93010800  | -2.30105700 |
| C | -2.60712100 | -4.96927900 | 2.94236000  |
| H | -2.93868600 | -4.77508300 | 3.96804600  |
| H | -2.57358500 | -6.05127900 | 2.78692500  |
| H | -1.58858700 | -4.58653800 | 2.83417700  |
| C | -5.07266000 | -4.16782700 | -0.99525200 |
| H | -4.52743100 | -3.44025800 | -1.60264800 |
| H | -5.78647400 | -4.68844300 | -1.64210200 |
| H | -5.63496100 | -3.61490400 | -0.23857400 |
| C | 5.49168400  | 0.21523400  | -0.13448500 |



|    |             |             |             |
|----|-------------|-------------|-------------|
| C  | 5.47389300  | -0.54255000 | -1.31503700 |
| C  | 6.63244600  | 0.96564500  | 0.15803200  |
| C  | 6.56096400  | -0.55524100 | -2.17980200 |
| H  | 4.58920700  | -1.11692600 | -1.55622300 |
| C  | 7.73632200  | 0.96600400  | -0.70191900 |
| H  | 6.69056700  | 1.56915600  | 1.05699100  |
| C  | 7.68913000  | 0.20277200  | -1.86230000 |
| H  | 6.52931600  | -1.14451400 | -3.08879600 |
| H  | 8.61763600  | 1.55374100  | -0.47108100 |
| C  | 4.23798300  | -1.25141300 | 1.44263500  |
| C  | 5.41032300  | -1.82523100 | 1.95259700  |
| C  | 3.05250500  | -1.98183200 | 1.55675400  |
| C  | 5.39351000  | -3.05814800 | 2.60348800  |
| H  | 6.36061400  | -1.32064400 | 1.81641400  |
| C  | 3.01022700  | -3.21669400 | 2.20247000  |
| H  | 2.14810600  | -1.58988100 | 1.11768500  |
| C  | 4.18578200  | -3.74177000 | 2.73257200  |
| H  | 6.30777500  | -3.49210800 | 2.99235600  |
| H  | 2.08015400  | -3.76990800 | 2.27666500  |
| C  | -3.68409200 | 0.63096700  | -1.30636100 |
| C  | -3.19172000 | -0.55467100 | -1.88232500 |
| C  | -3.91321000 | 1.72256100  | -2.15320500 |
| C  | -2.97389800 | -0.66815300 | -3.24894300 |
| H  | -2.97201600 | -1.39187900 | -1.23246100 |
| C  | -3.70776000 | 1.62218900  | -3.53153600 |
| H  | -4.25360200 | 2.67217400  | -1.76765100 |
| C  | -3.25497500 | 0.42343800  | -4.06958500 |
| H  | -2.57616400 | -1.58461500 | -3.66699700 |
| H  | -3.87982900 | 2.47619400  | -4.17619100 |
| C  | -5.18035800 | -0.32002500 | 0.46543300  |
| C  | -6.26765600 | -0.36121000 | -0.41233500 |
| C  | -5.24250300 | -1.06842200 | 1.64467000  |
| C  | -7.39225100 | -1.13691700 | -0.12829500 |
| H  | -6.23323600 | 0.19951200  | -1.34037400 |
| C  | -6.35674900 | -1.84774600 | 1.94765800  |
| H  | -4.38971800 | -1.04236800 | 2.31271300  |
| C  | -7.42506200 | -1.87584400 | 1.05203200  |
| H  | -8.22797300 | -1.17642900 | -0.81760400 |
| H  | -6.39699200 | -2.43352500 | 2.85928100  |
| Cl | 9.07404600  | 0.19385100  | -2.94971900 |
| Cl | 4.15153000  | -5.29807500 | 3.55038300  |
| Cl | -8.82614800 | -2.87634900 | 1.41045600  |
| Cl | -2.98438600 | 0.29980900  | -5.79760400 |
| H  | -0.43332900 | -0.80738700 | 1.78662800  |

**3-R**

|   |             |             |             |
|---|-------------|-------------|-------------|
| C | -1.18373100 | 0.22654300  | -0.22306300 |
| C | -2.10887500 | 1.05956000  | 0.40839400  |
| C | -1.67304400 | -0.98216100 | -0.74518400 |
| C | -3.45446800 | 0.73252700  | 0.52167900  |
| H | -1.76053500 | 2.00054300  | 0.82108500  |
| C | -3.01884200 | -1.32980100 | -0.65464200 |
| C | -3.94841800 | -0.47860500 | -0.01582000 |
| H | -4.11365000 | 1.41645400  | 1.03877500  |
| H | -3.33992300 | -2.26289000 | -1.10395900 |
| O | -0.76397300 | -1.80676300 | -1.35115200 |
| N | -5.28497500 | -0.82093200 | 0.07769500  |
| C | -6.26947900 | 0.10167600  | 0.62761900  |
| H | -6.02384200 | 1.12150600  | 0.31564800  |
| H | -7.23425100 | -0.12881200 | 0.16295800  |
| C | -5.77574300 | -2.11757700 | -0.36551700 |
| H | -5.03853600 | -2.88912900 | -0.11914300 |
| H | -6.66446300 | -2.35662700 | 0.22831800  |
| N | 1.01891500  | -0.22371000 | 0.68721900  |
| C | 0.29314500  | 0.54904900  | -0.33569500 |
| H | 0.65195300  | 0.20377000  | -1.31169000 |
| C | 0.58320300  | 2.03784900  | -0.23863200 |
| C | 0.32760200  | 2.84818900  | -1.35003300 |
| C | 1.05708500  | 2.62570300  | 0.93497200  |
| C | 0.53964000  | 4.22348900  | -1.28957100 |
| H | -0.04178000 | 2.39338900  | -2.26552700 |
| C | 1.27196500  | 4.00404100  | 0.99835700  |
| H | 1.26723400  | 1.99513700  | 1.79210000  |
| C | 1.01306000  | 4.80717600  | -0.11178100 |
| H | 0.34106700  | 4.83993000  | -2.16155400 |
| H | 1.64634800  | 4.44845600  | 1.91609500  |
| H | 1.18346200  | 5.87862700  | -0.06357600 |
| C | 6.63211700  | -0.92592000 | -1.09328400 |
| C | 6.84596500  | -1.83411100 | -0.04763200 |
| C | 5.81549900  | -2.15410500 | 0.83827000  |
| C | 4.57699600  | -1.54721300 | 0.65322900  |
| C | 4.34302500  | -0.62734000 | -0.40071800 |
| C | 5.39083200  | -0.32100800 | -1.27634000 |
| H | 7.44665100  | -0.68930800 | -1.77119200 |
| H | 7.82075100  | -2.29475900 | 0.07852500  |
| H | 5.97922500  | -2.85670100 | 1.64891500  |
| H | 5.21457400  | 0.38402400  | -2.08157500 |
| S | 3.09954900  | -1.74117400 | 1.59628000  |

|   |             |             |             |
|---|-------------|-------------|-------------|
| N | 3.06164400  | -0.10322900 | -0.47233300 |
| C | 2.31380400  | -0.57748000 | 0.47623600  |
| C | -6.12422700 | -2.16133700 | -1.85756900 |
| H | -6.48978100 | -3.15324500 | -2.14390300 |
| H | -6.90398400 | -1.42994000 | -2.09205000 |
| H | -5.25072100 | -1.92323800 | -2.47072300 |
| C | -6.39551500 | 0.02026000  | 2.15249600  |
| H | -5.44180900 | 0.25084000  | 2.63472500  |
| H | -7.14871800 | 0.72571100  | 2.51900100  |
| H | -6.69250200 | -0.98685100 | 2.46225400  |
| H | -1.22205200 | -2.57954200 | -1.70475000 |
| H | 0.45562900  | -0.83578300 | 1.25728700  |

## 9. HPLC spectra

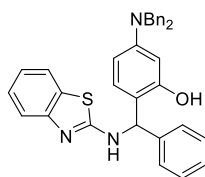

**3a**

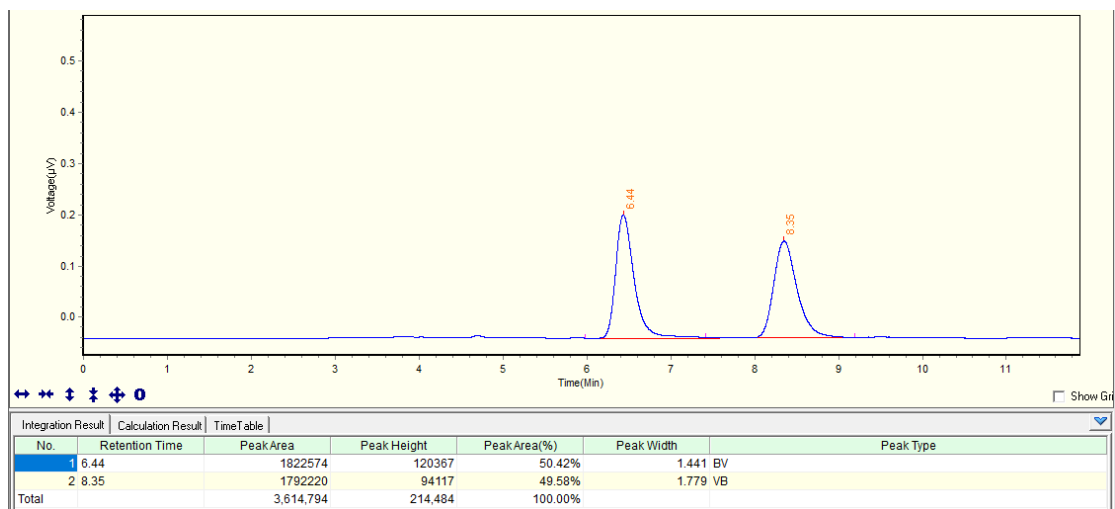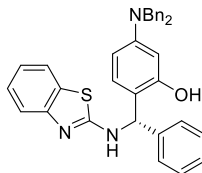

**(S)-3a**

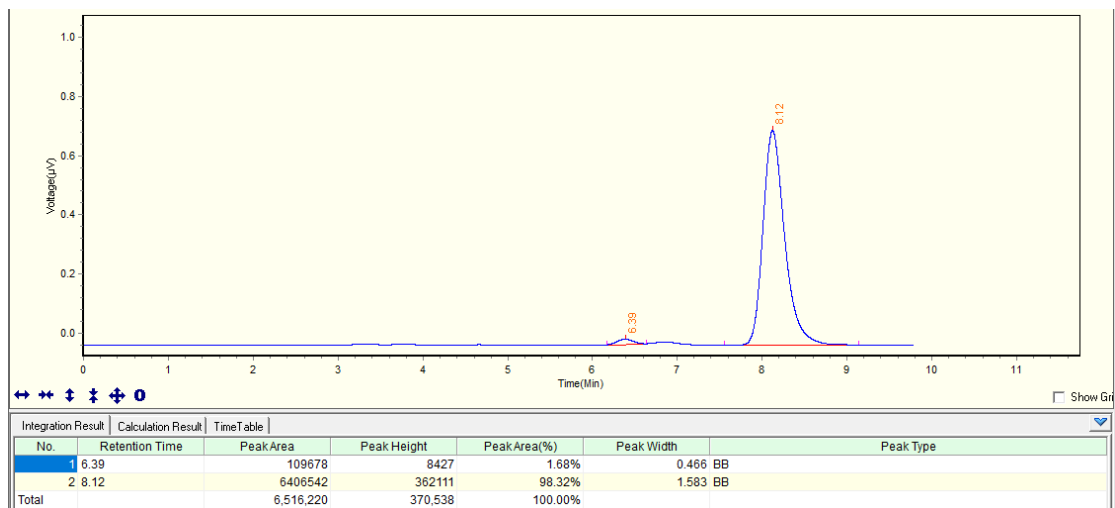

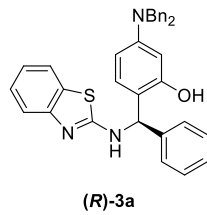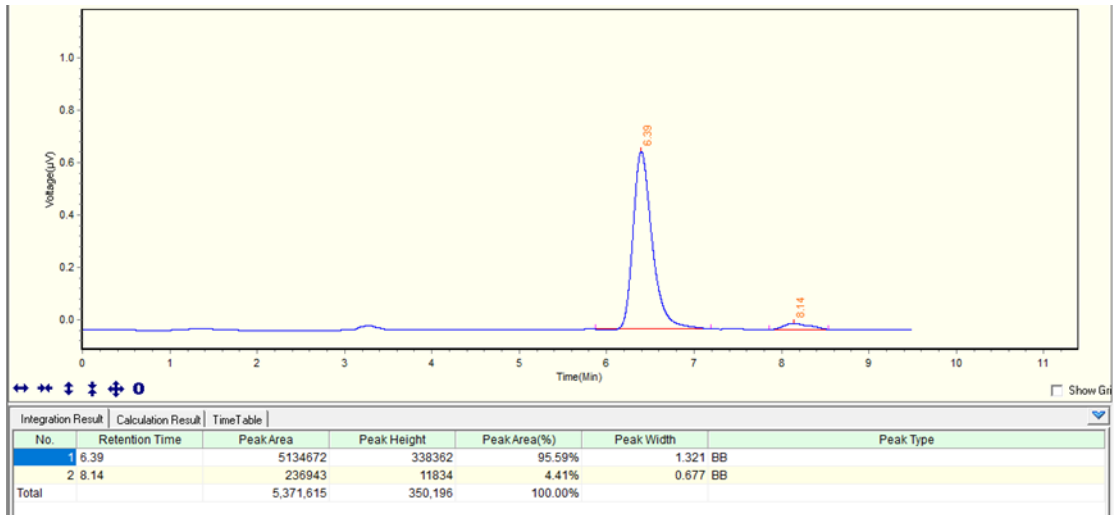

| No.   | Retention Time | Peak Area | Peak Height | Peak Area(%) | Peak Width | Peak Type |
|-------|----------------|-----------|-------------|--------------|------------|-----------|
| 1     | 6.39           | 5134672   | 338362      | 95.59%       | 1.321      | BB        |
| 2     | 8.14           | 236943    | 11834       | 4.41%        | 0.677      | BB        |
| Total |                | 5,371,615 | 350,196     | 100.00%      |            |           |

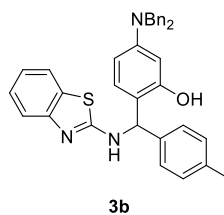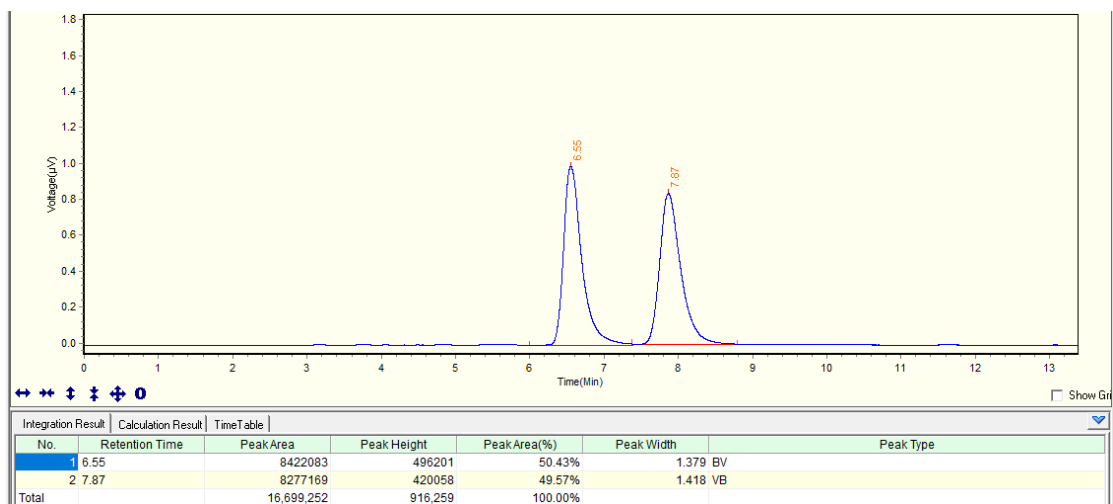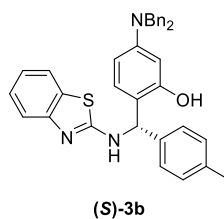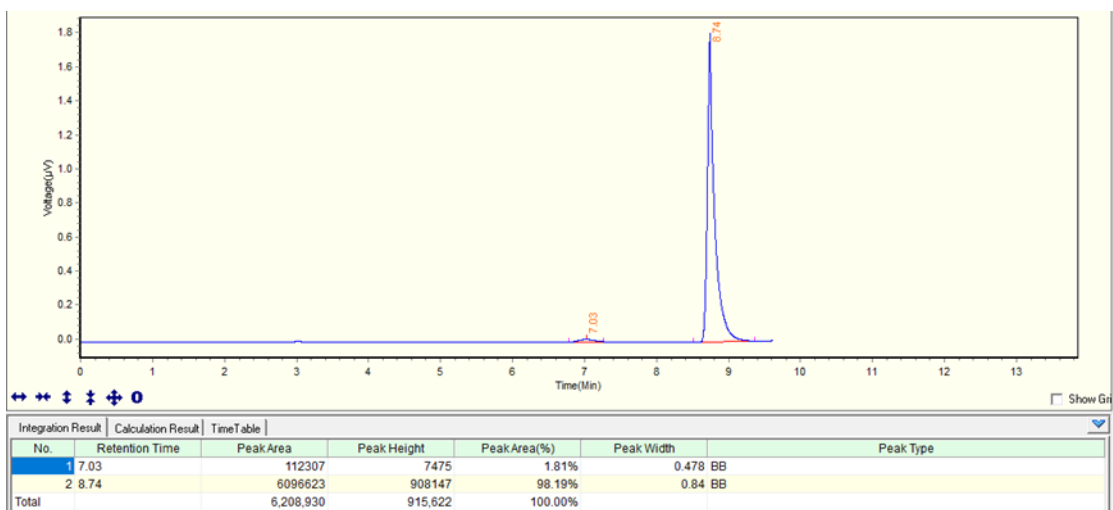

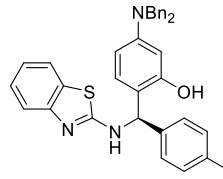

(R)-3b

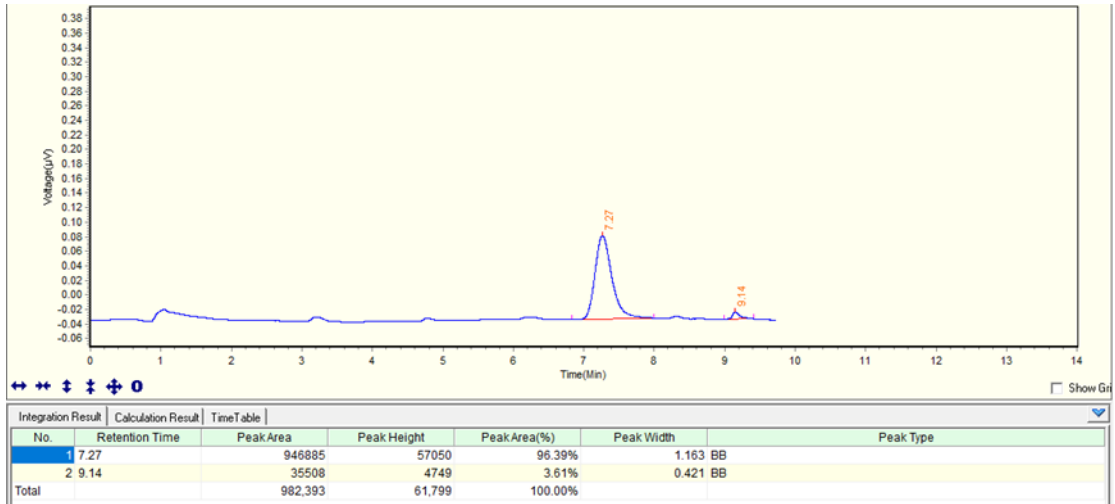

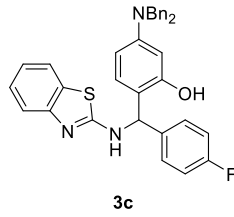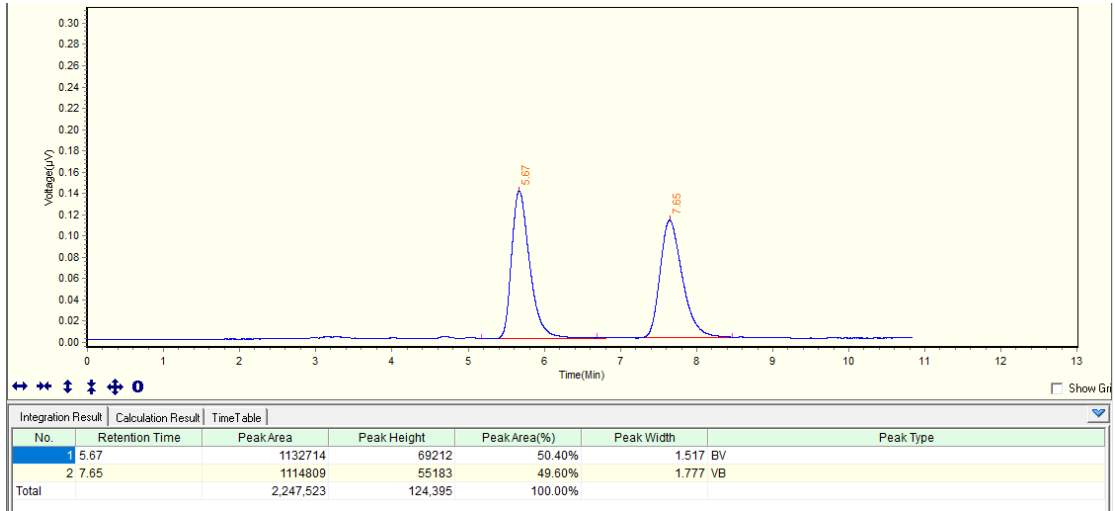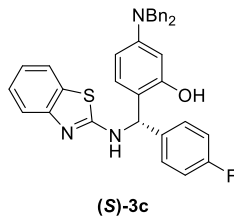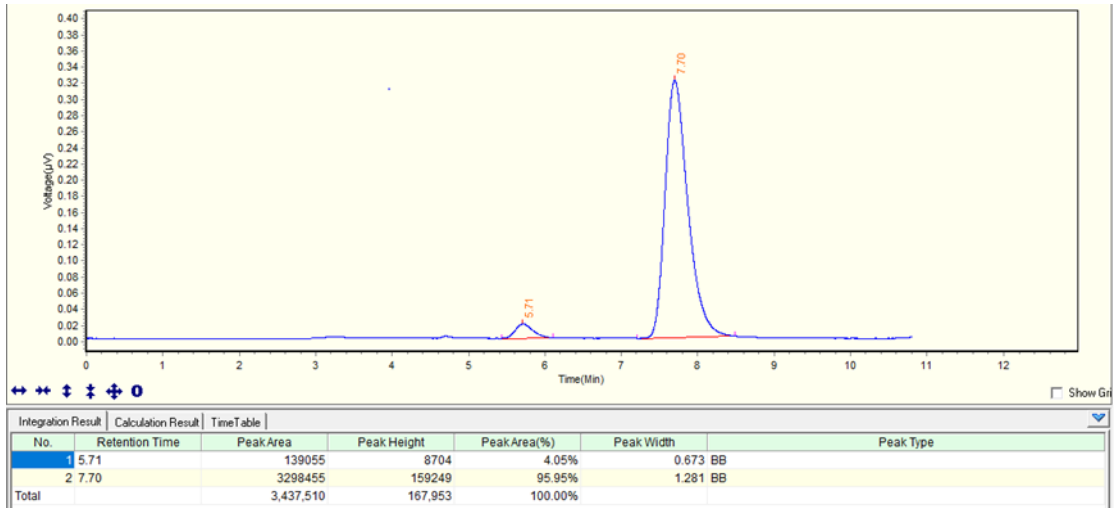



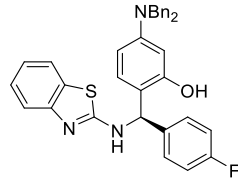

(R)-3c

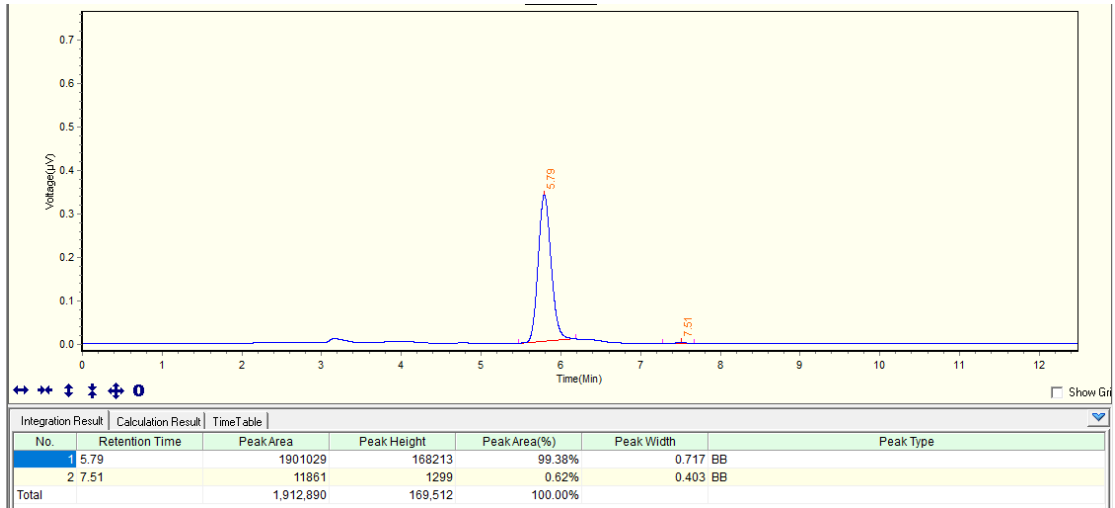

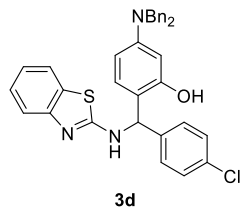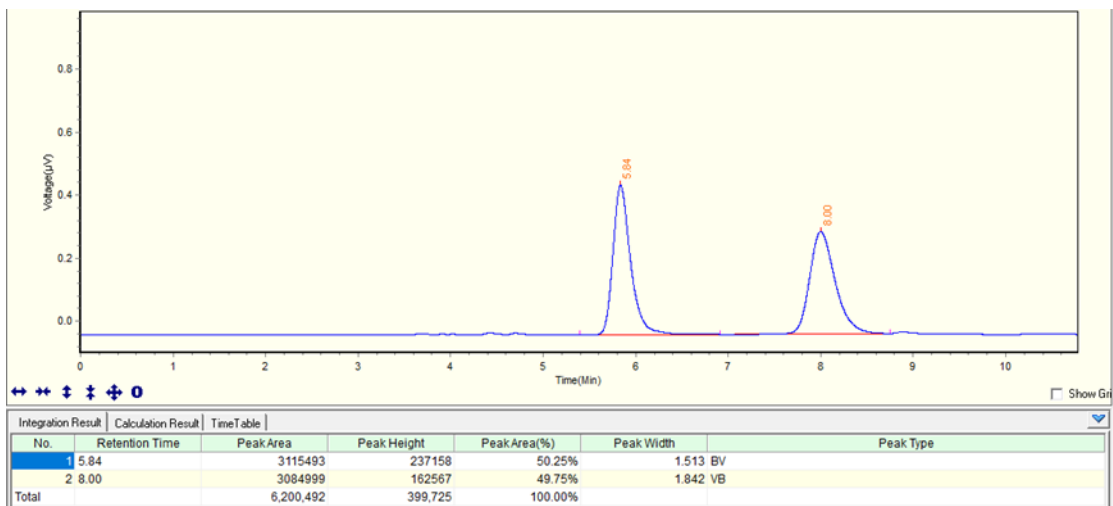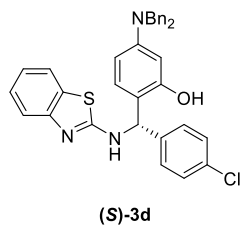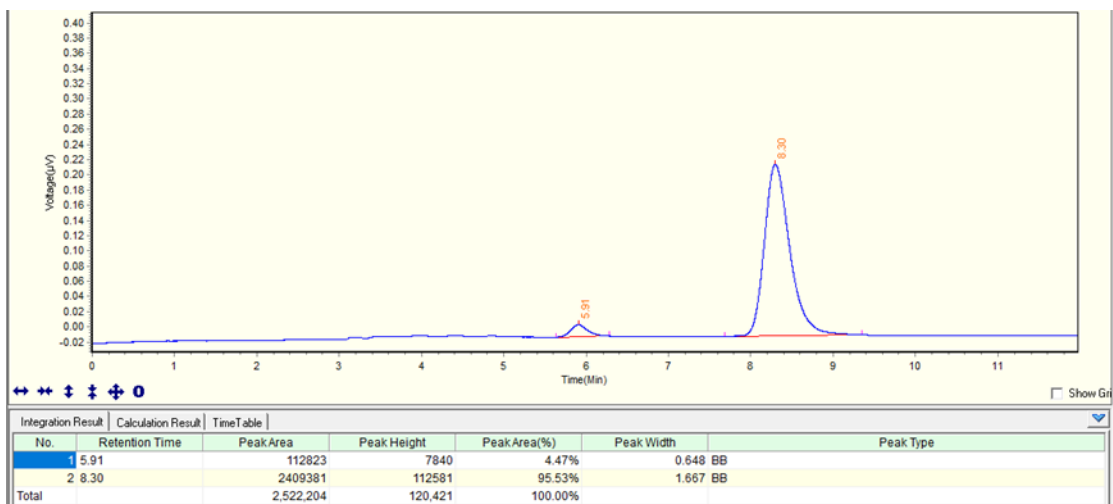

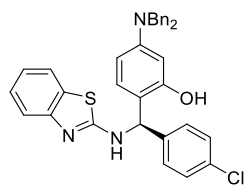

(R)-3d

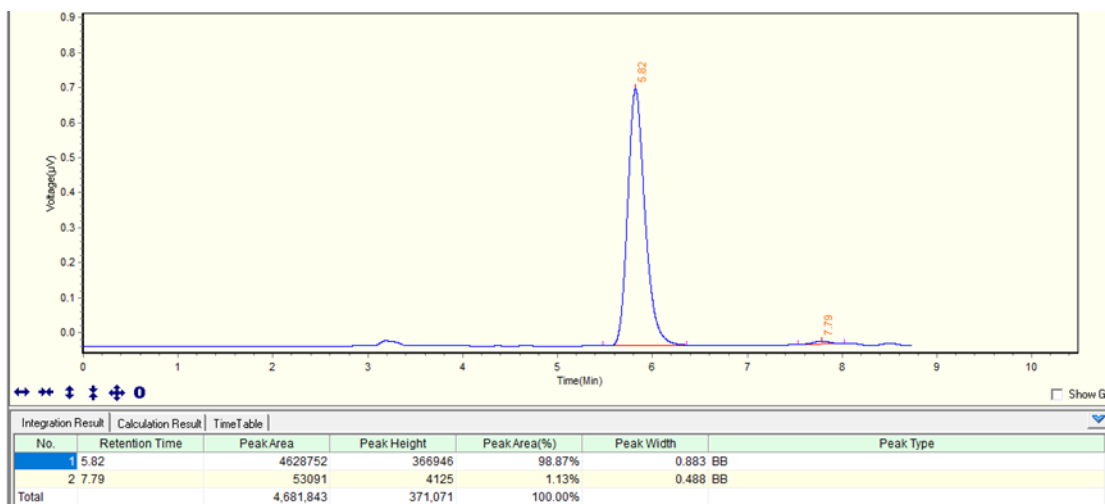

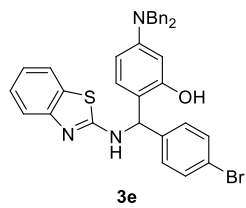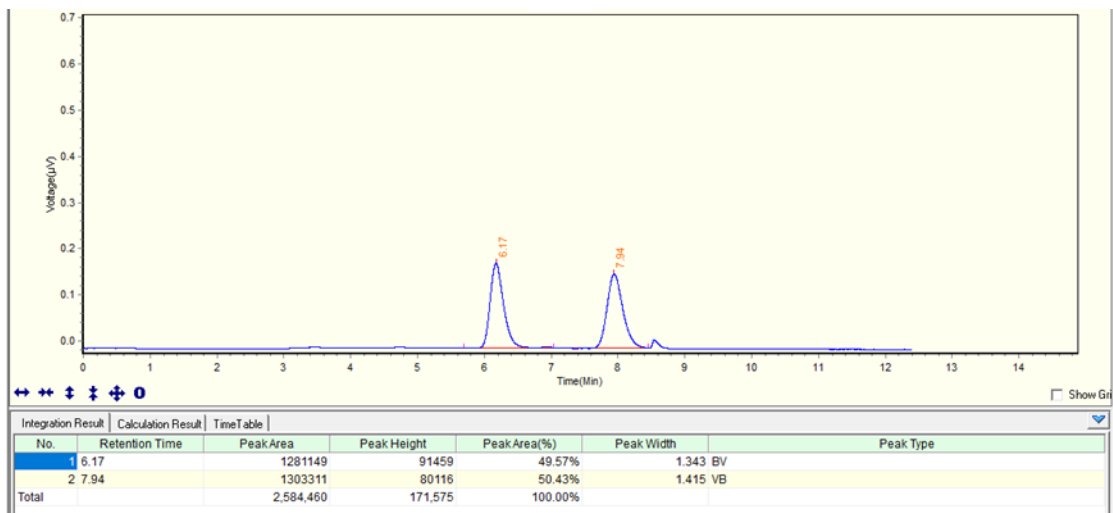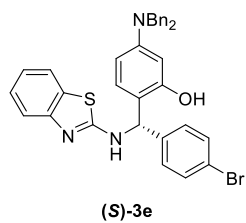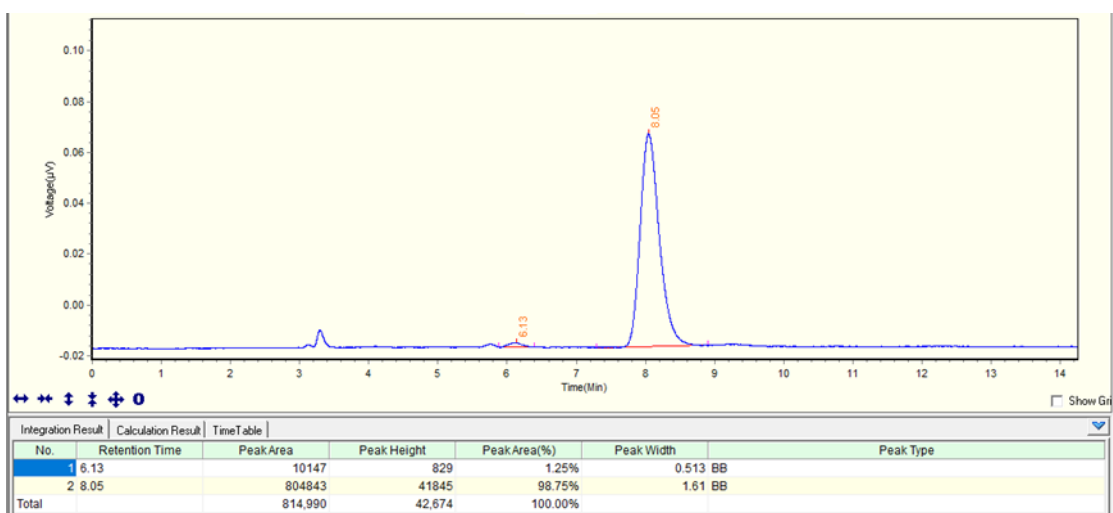

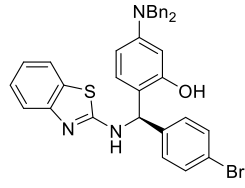

(R)-3e

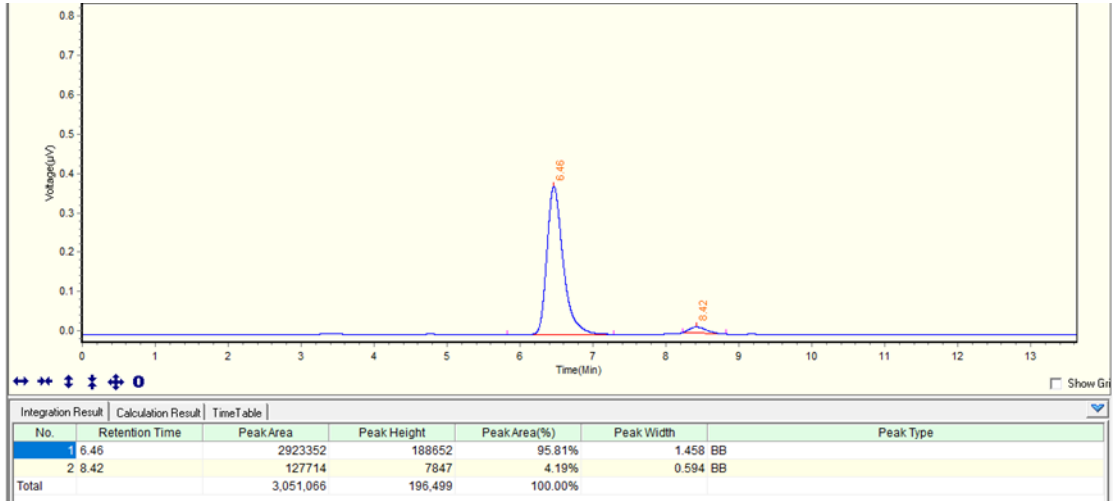

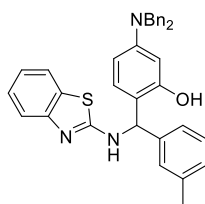

3f

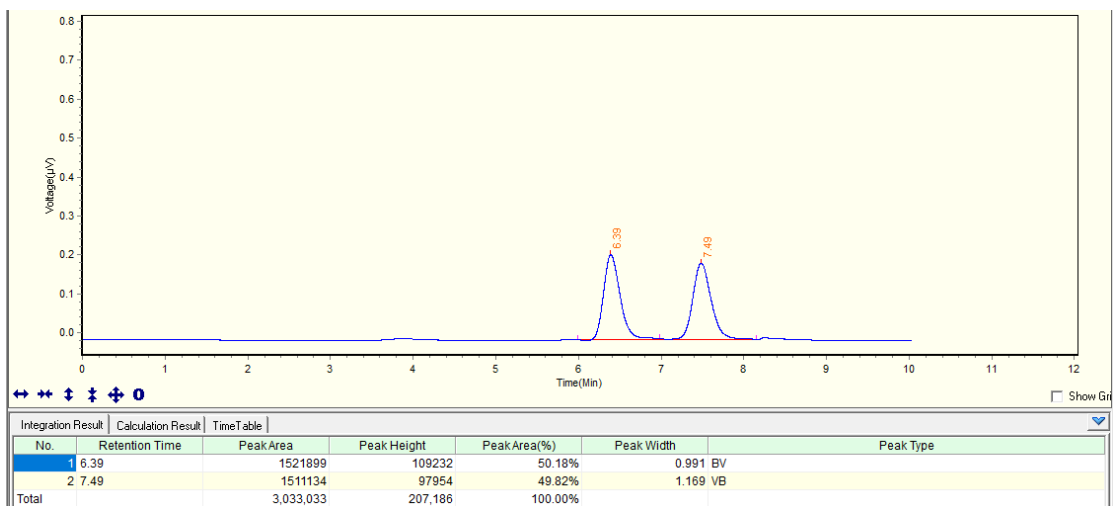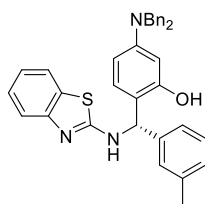

(S)-3f

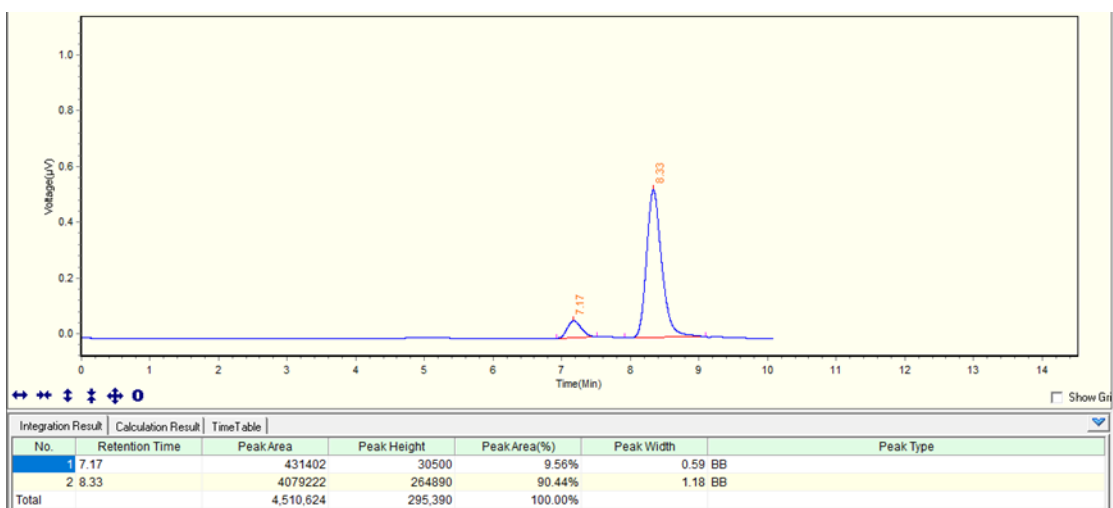

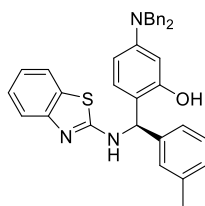

(R)-3f

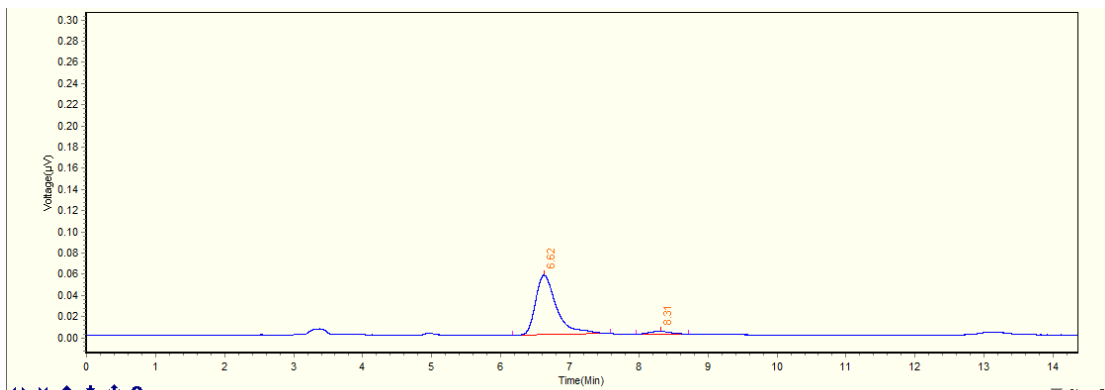

| No.   | Retention Time | Peak Area | Peak Height | Peak Area(%) | Peak Width | Peak Type |
|-------|----------------|-----------|-------------|--------------|------------|-----------|
| 1     | 6.62           | 587205    | 27935       | 95.33%       | 1.42       | BB        |
| 2     | 8.31           | 28735     | 1367        | 4.67%        | 0.763      | BB        |
| Total |                | 615,940   | 29,302      | 100.00%      |            |           |

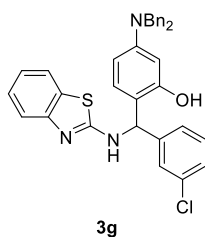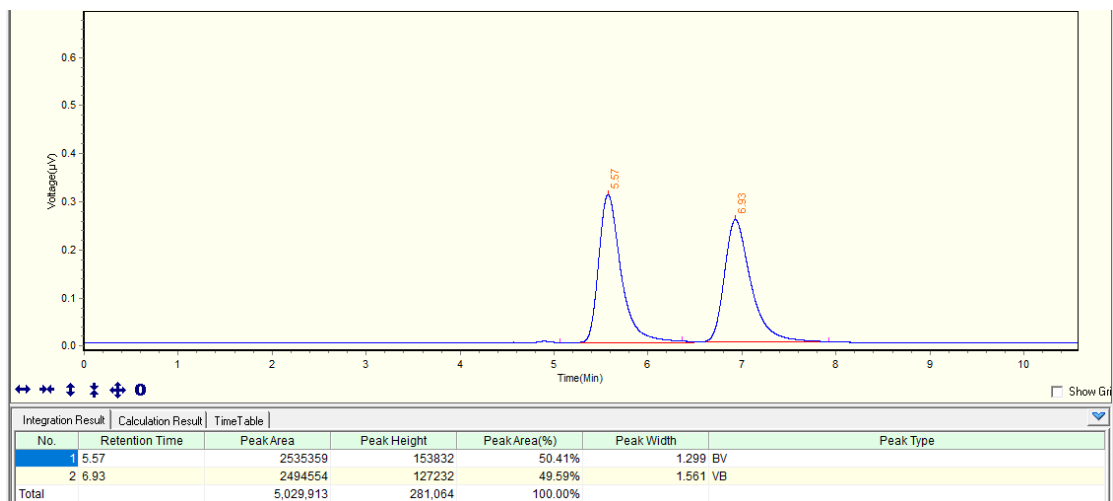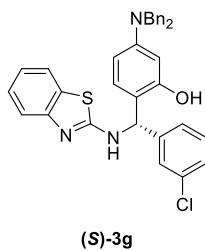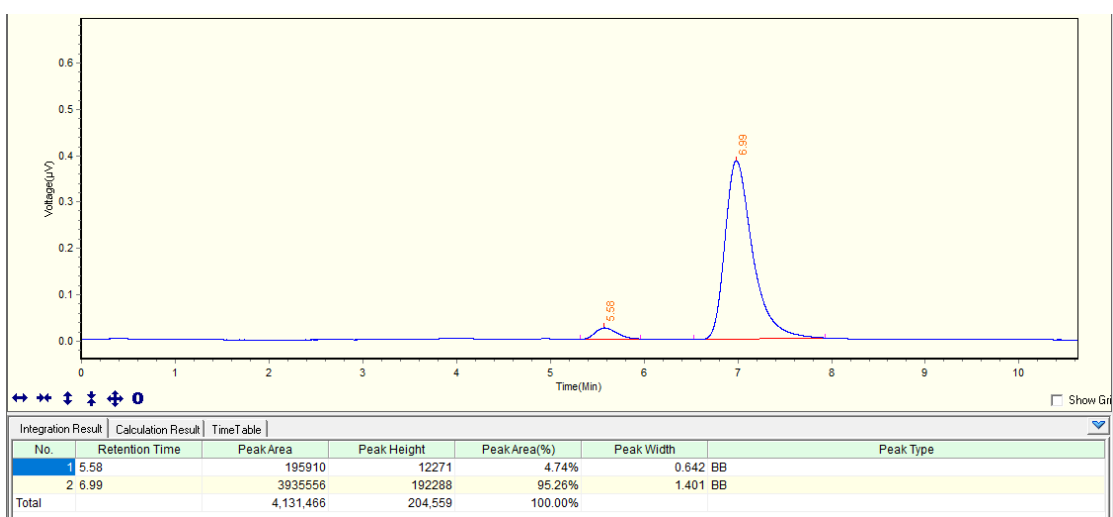



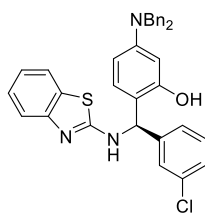

(R)-3g

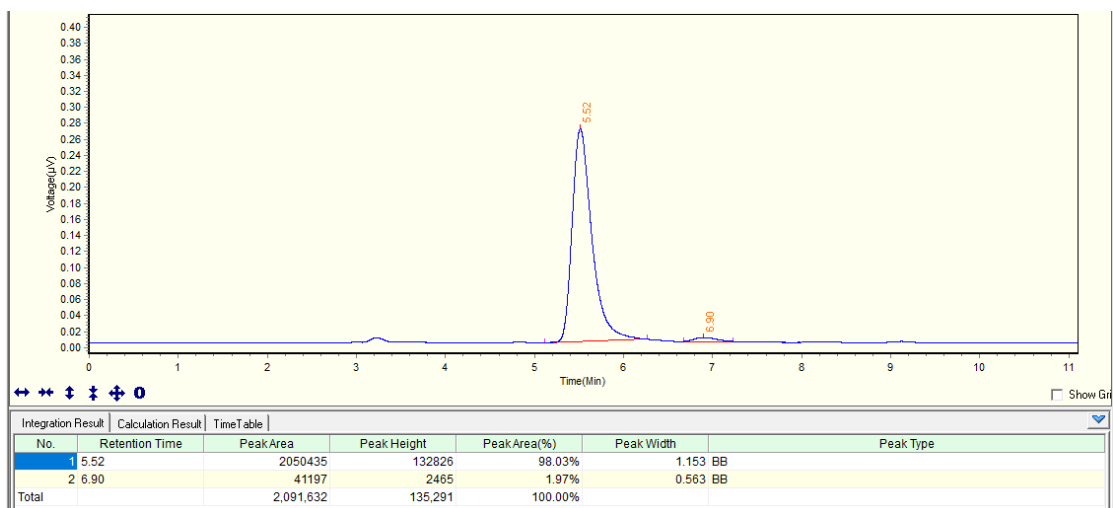

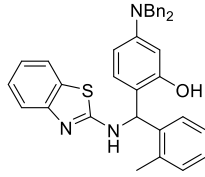

3h

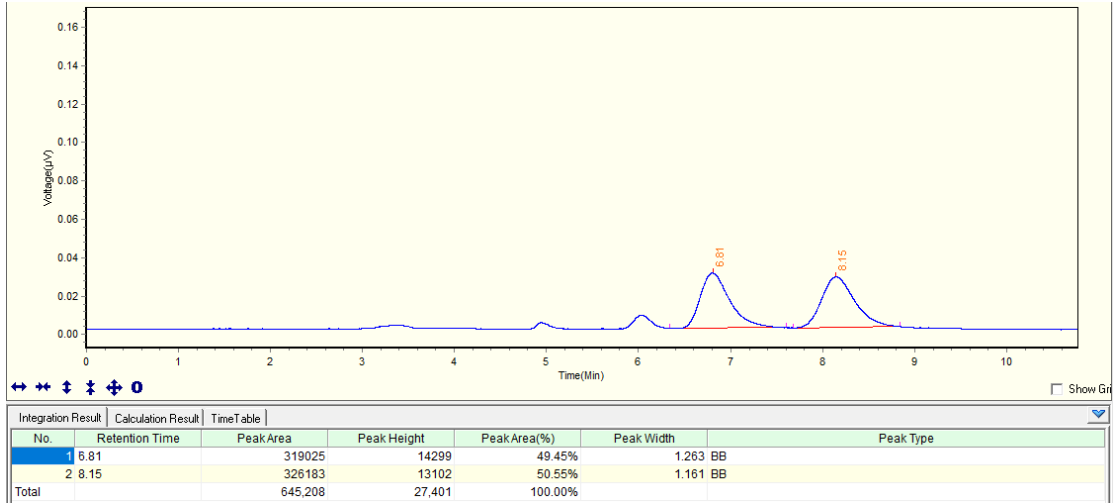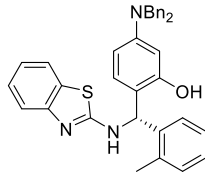

(S)-3h

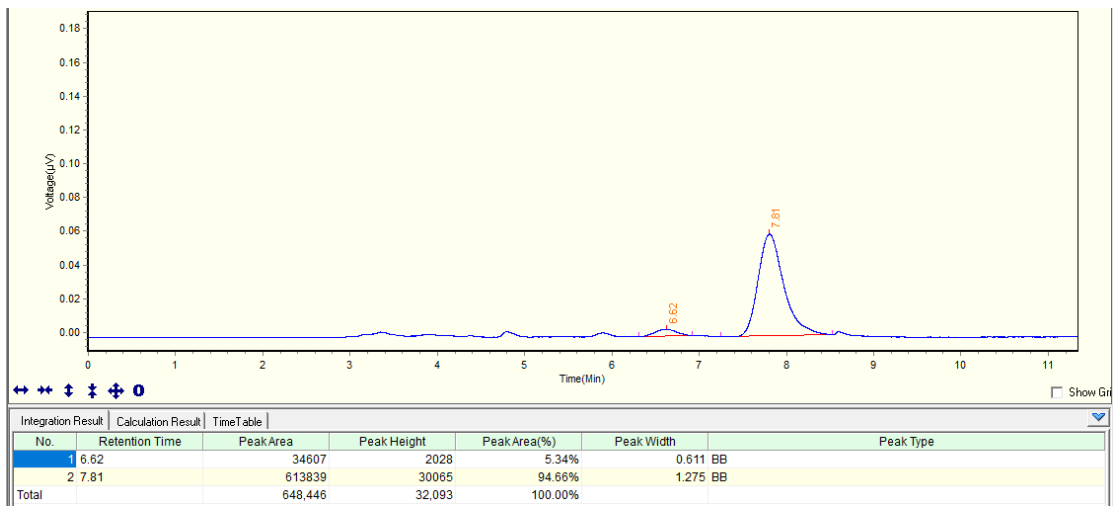

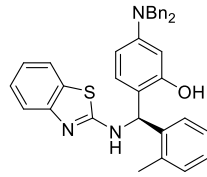

(R)-3h

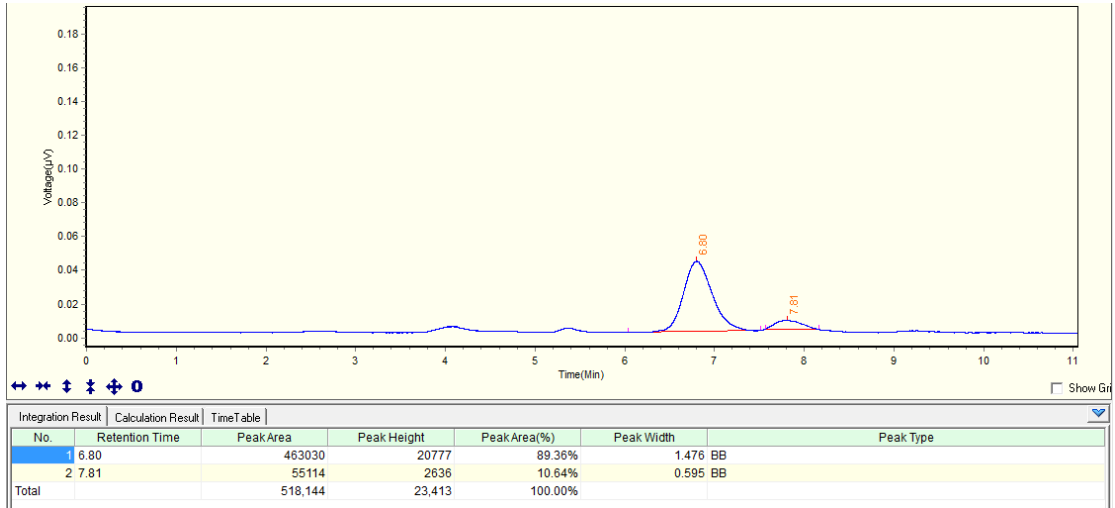

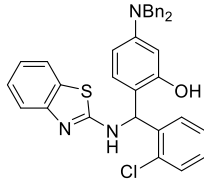

3i

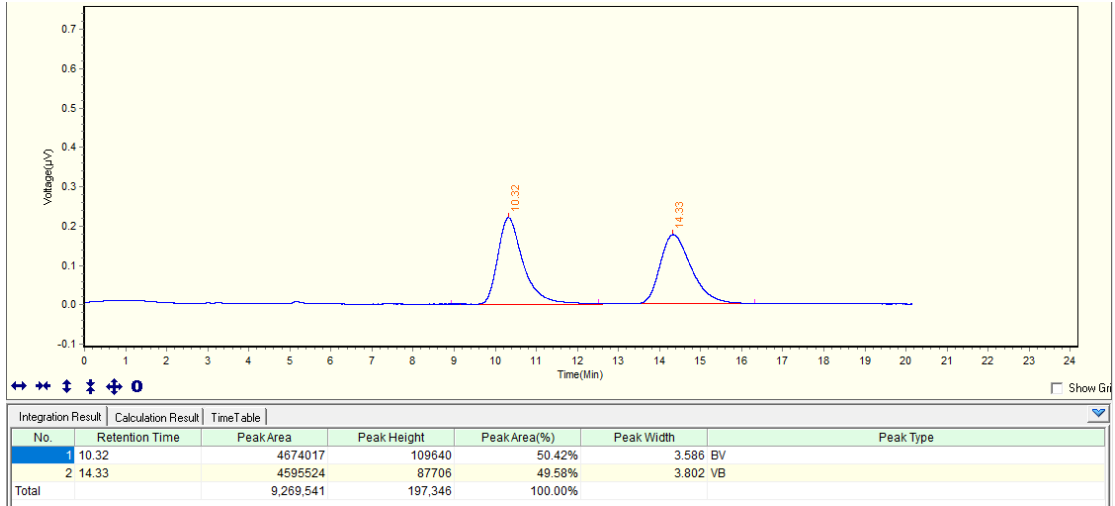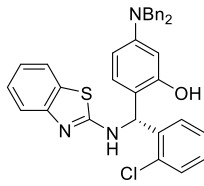

(R)-3i

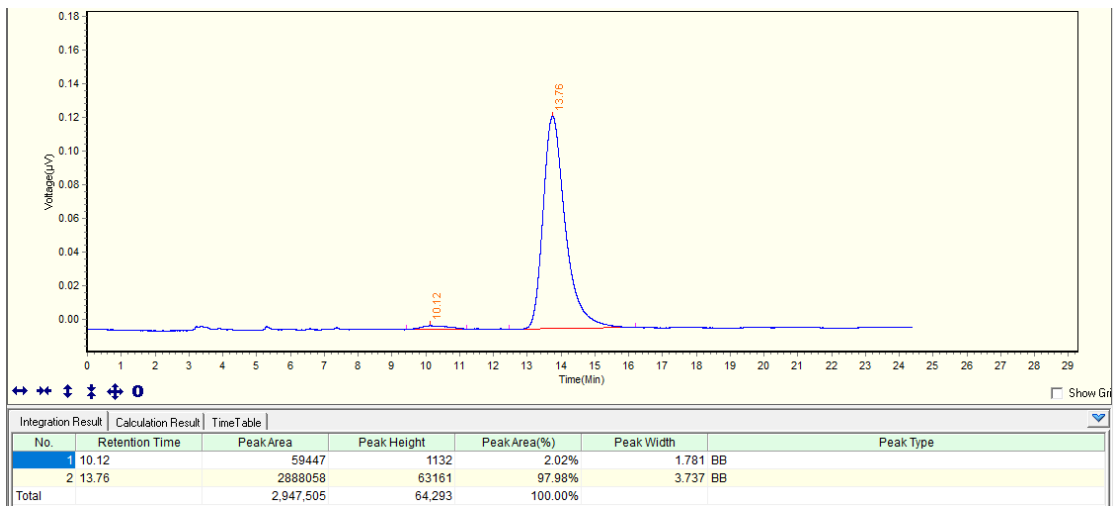

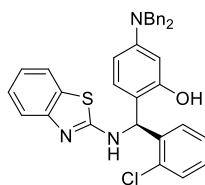

(S)-3i

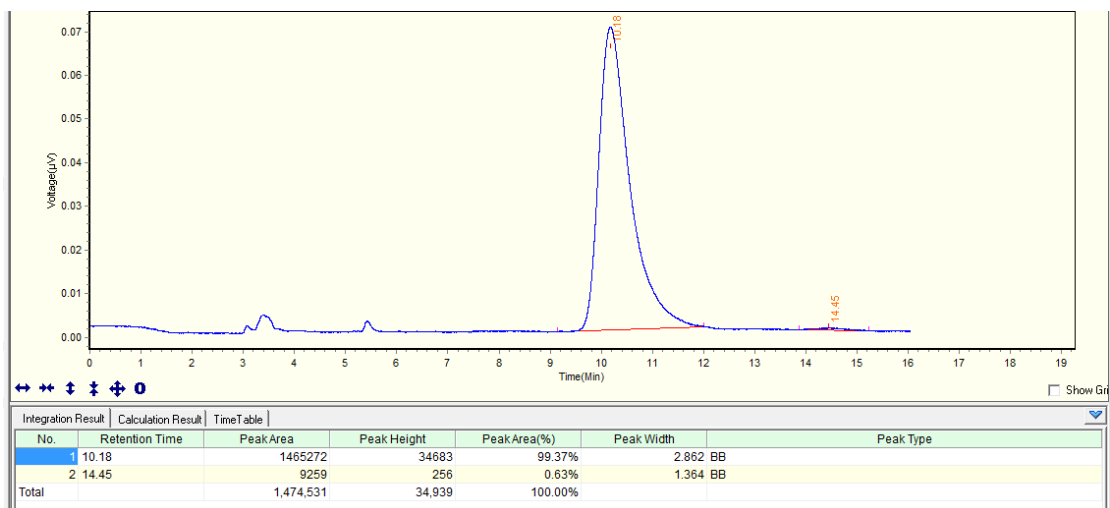

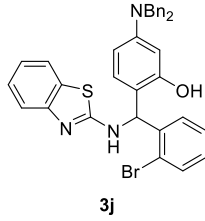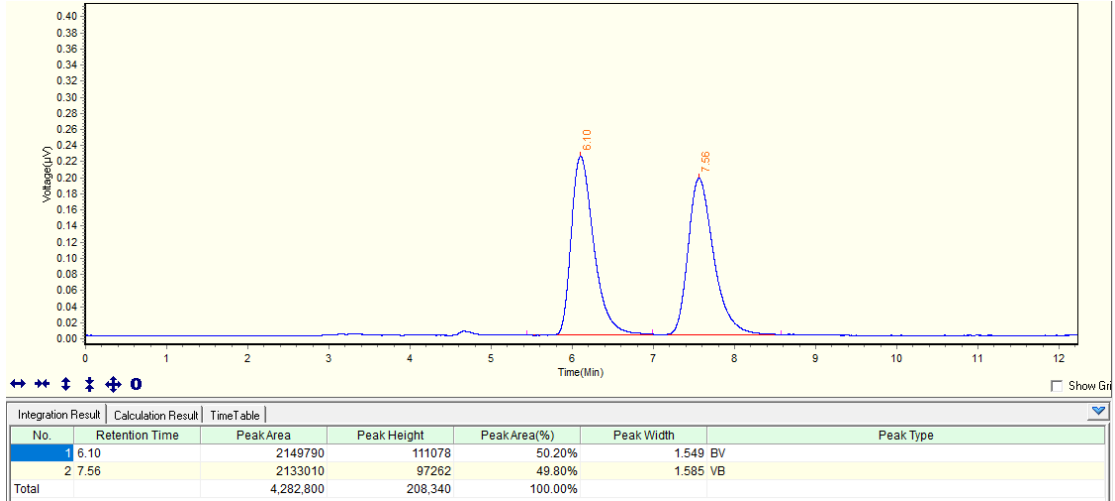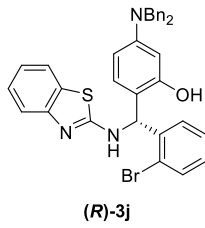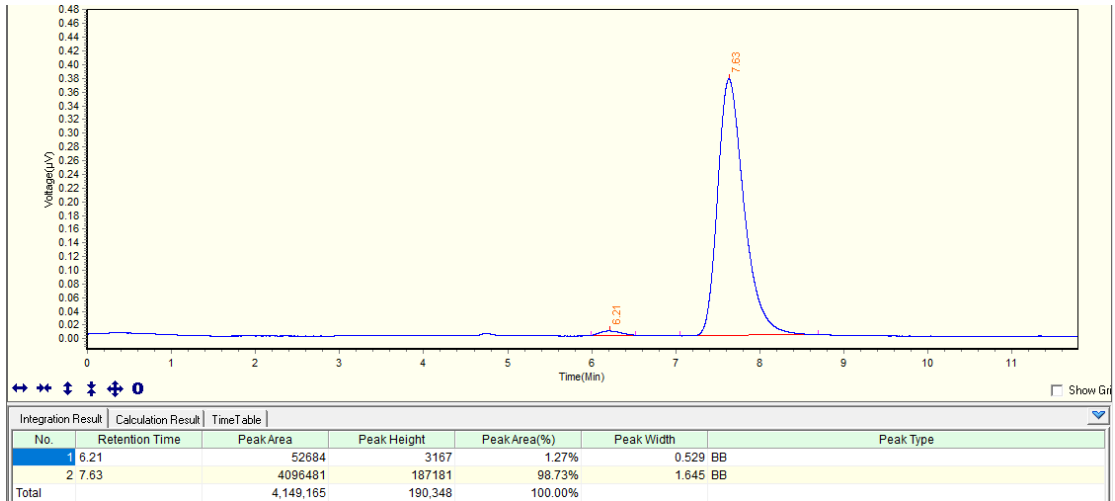

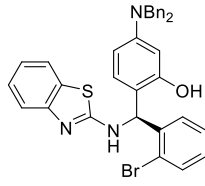

(S)-3j

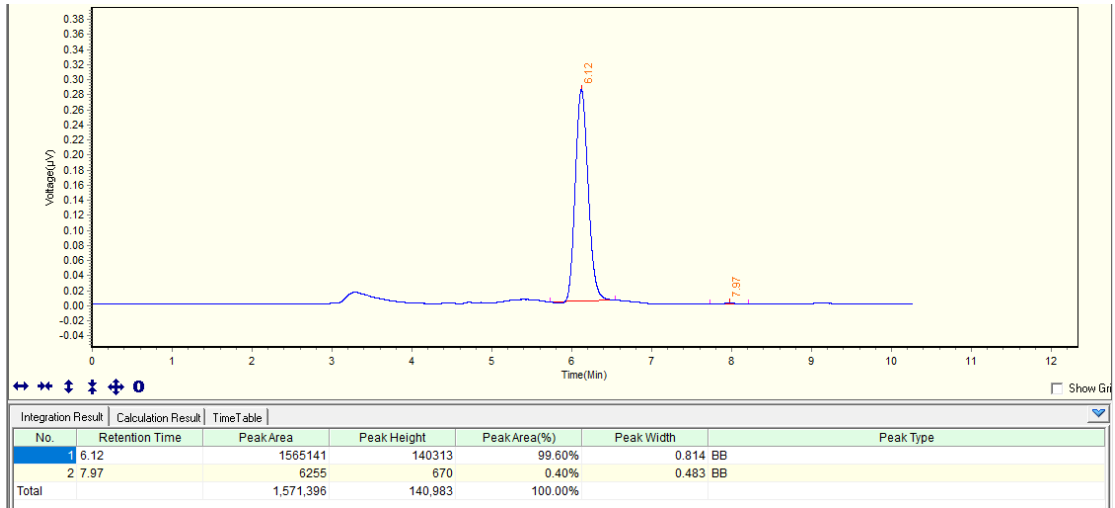

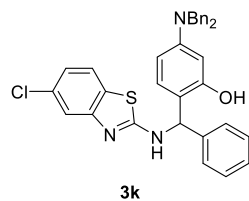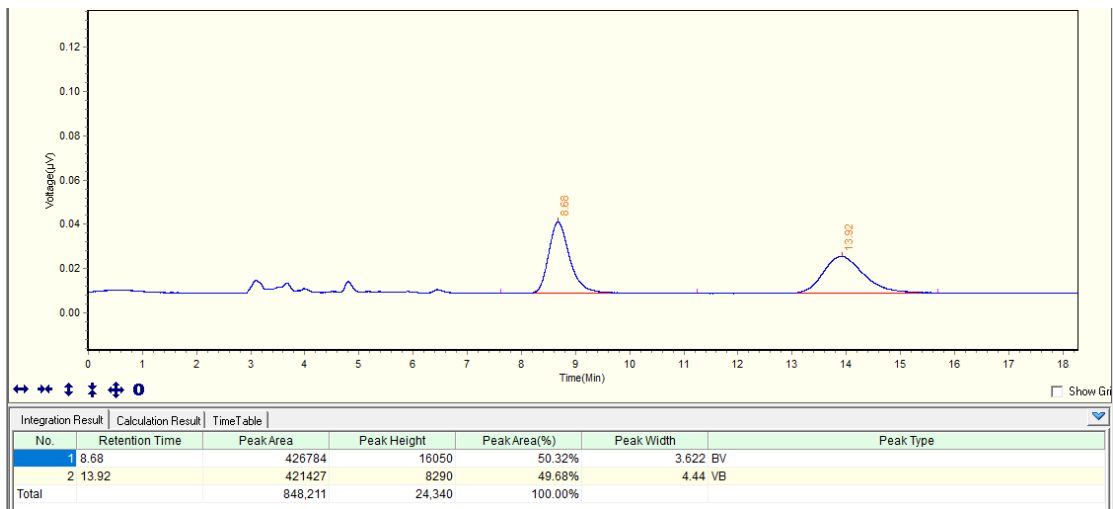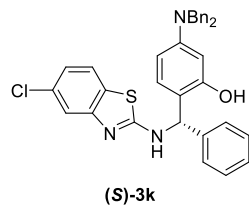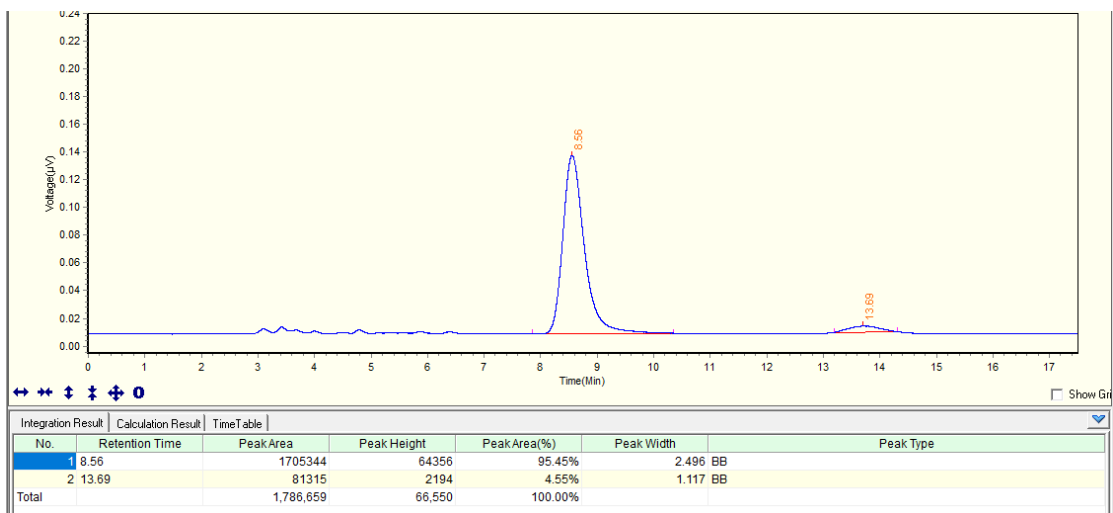



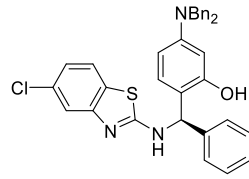

(R)-3k

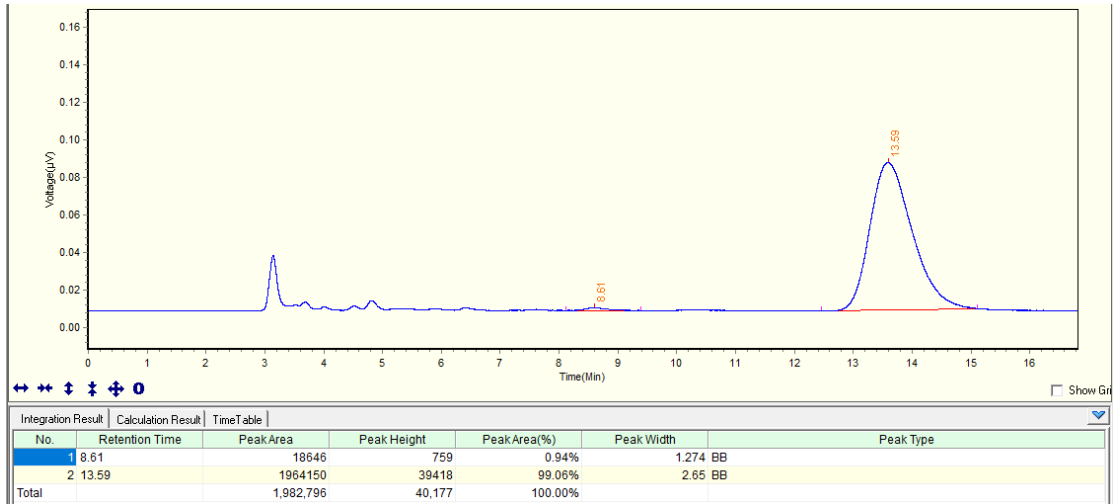

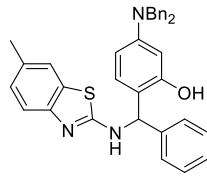

31

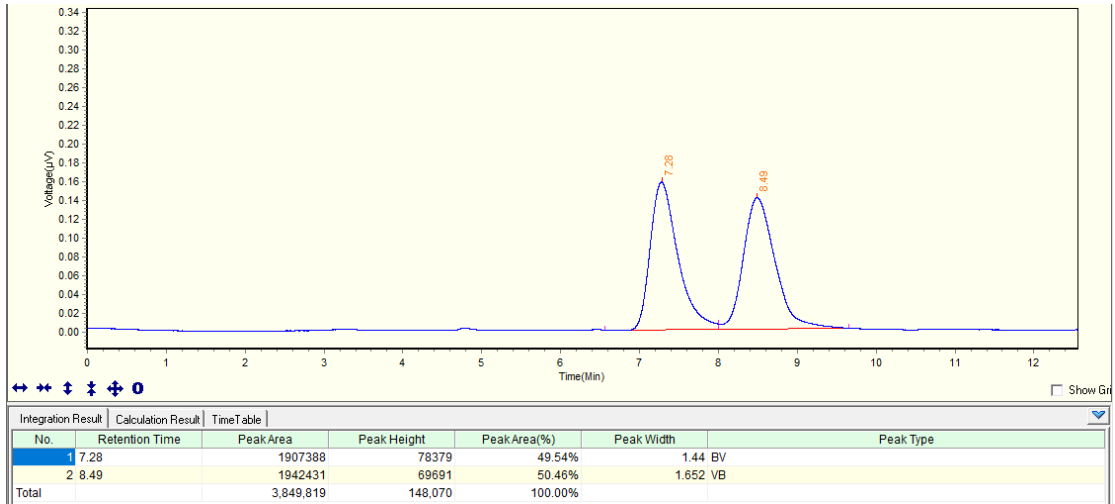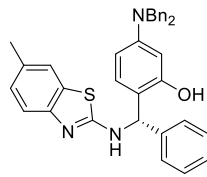

(S)-31

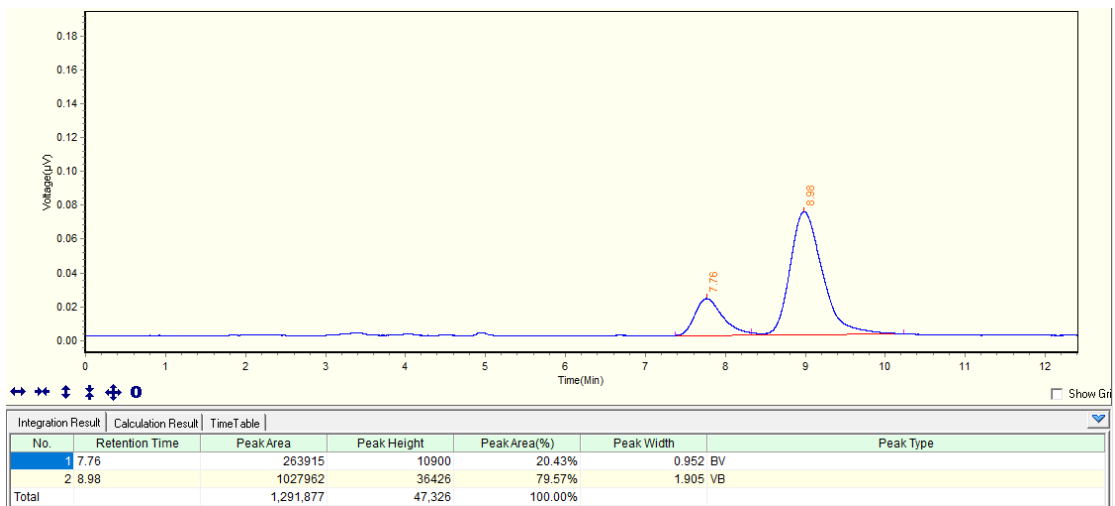

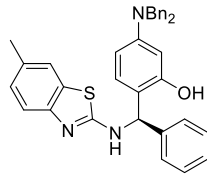

(R)-3I

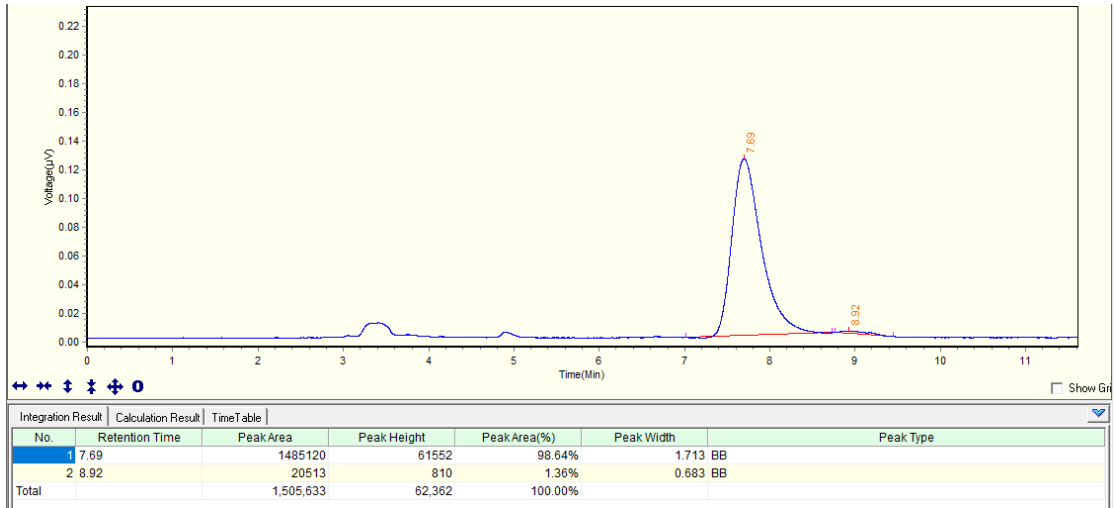

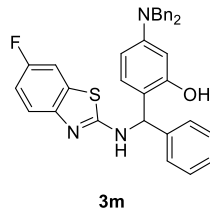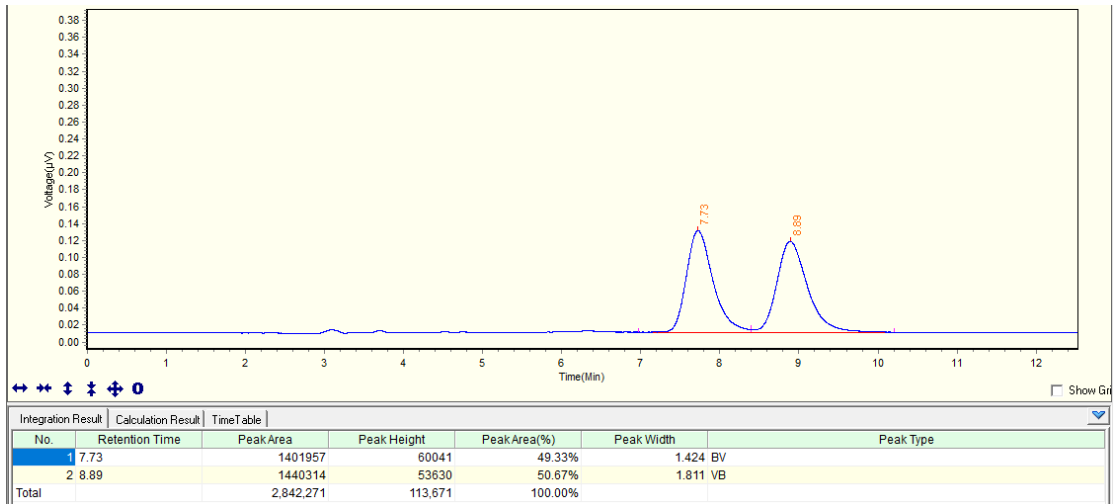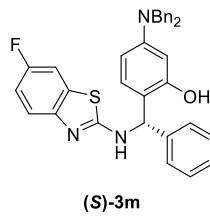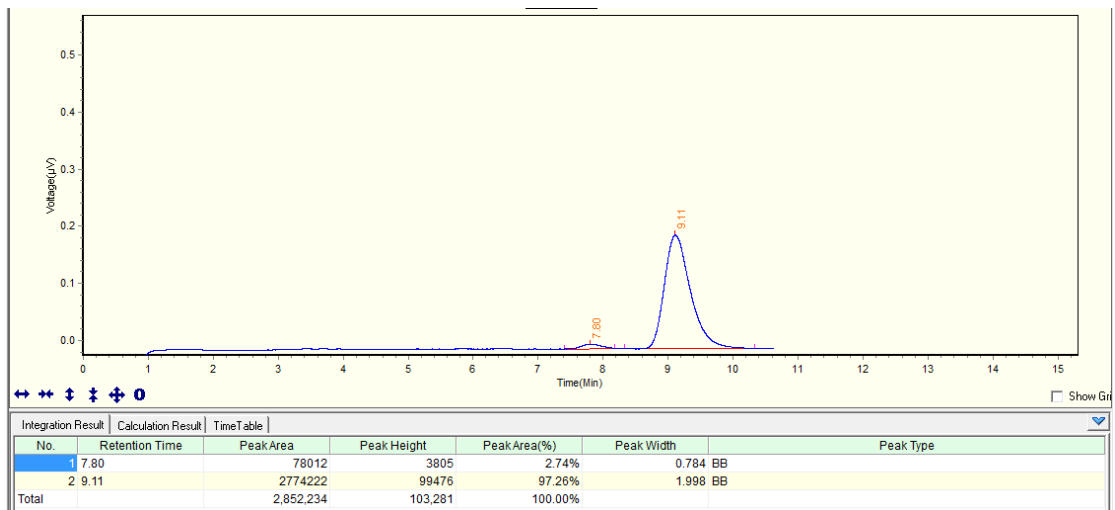

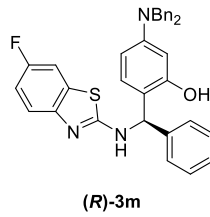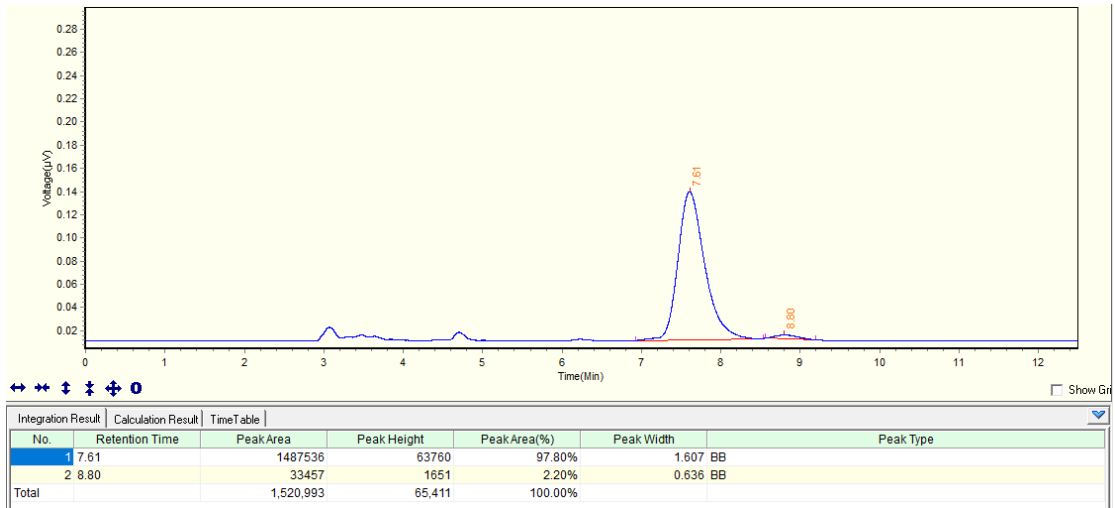

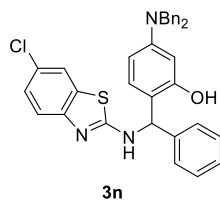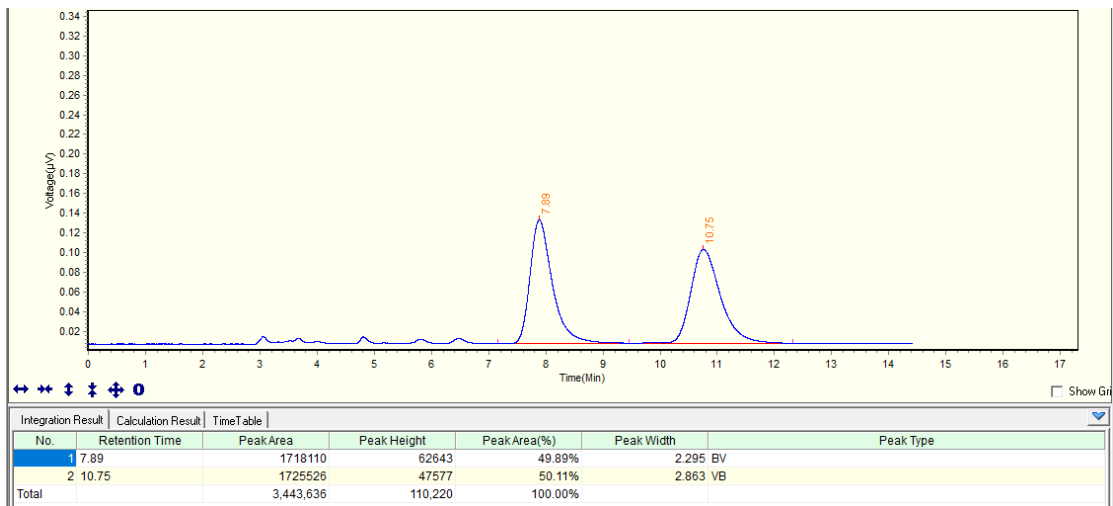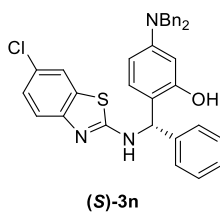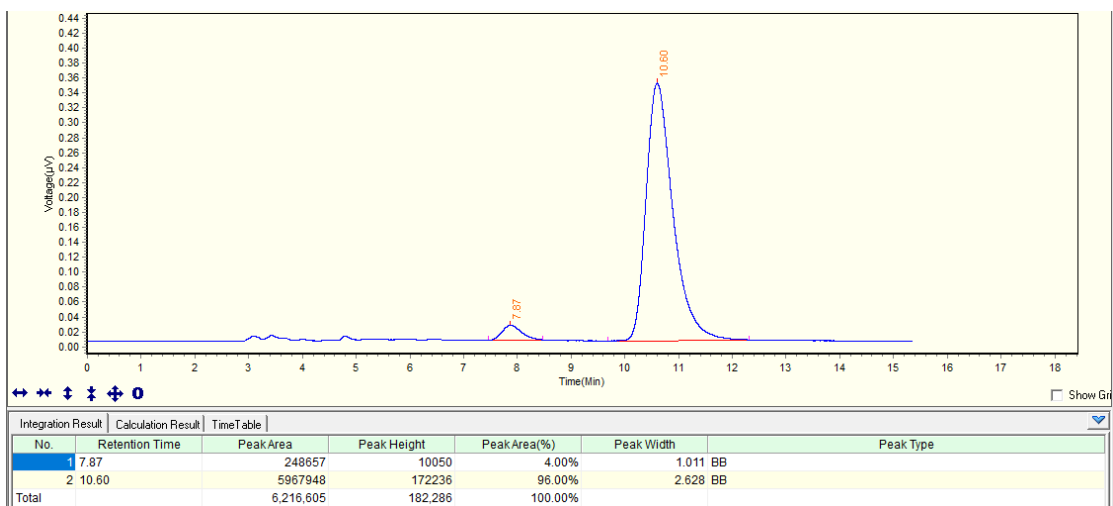

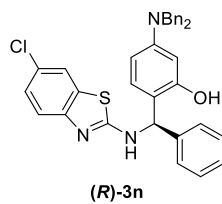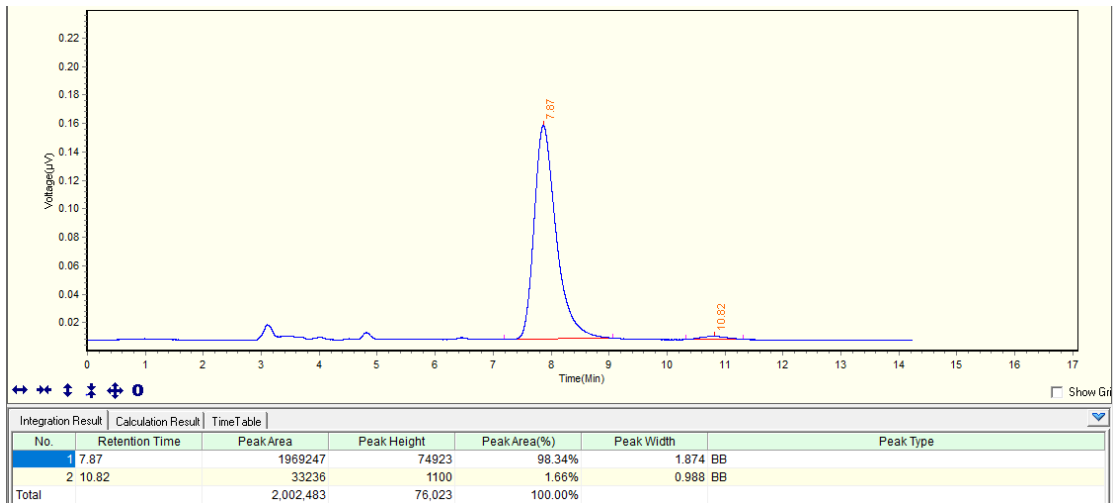

| No.   | Retention Time | Peak Area | Peak Height | Peak Area(%) | Peak Width | Peak Type |
|-------|----------------|-----------|-------------|--------------|------------|-----------|
| 1     | 7.87           | 1969247   | 74923       | 98.34%       | 1.874      | BB        |
| 2     | 10.82          | 33236     | 1100        | 1.66%        | 0.988      | BB        |
| Total |                | 2,002,483 | 76,023      | 100.00%      |            |           |

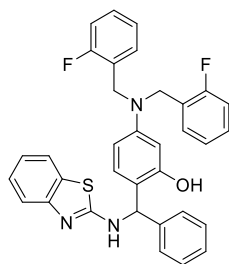

3o

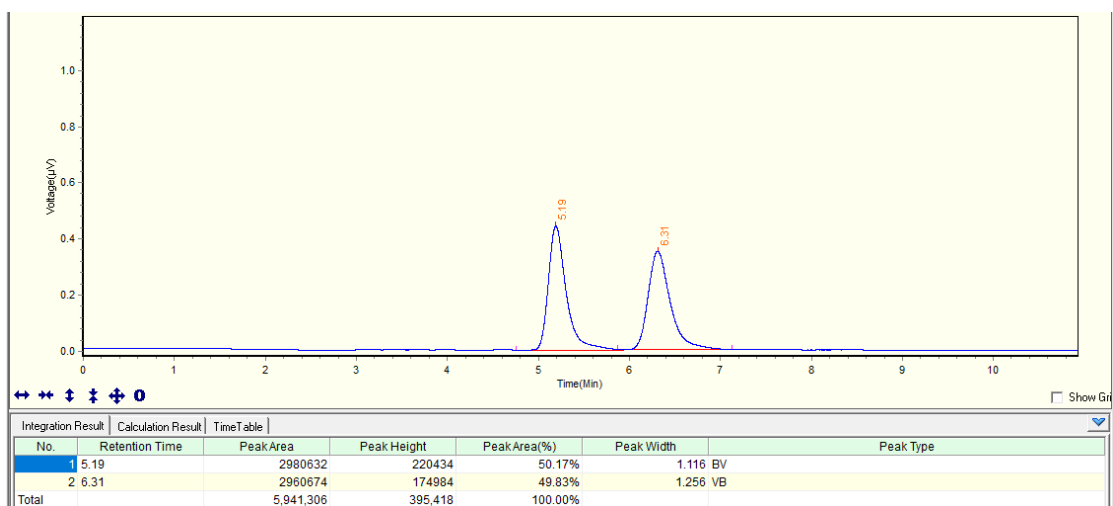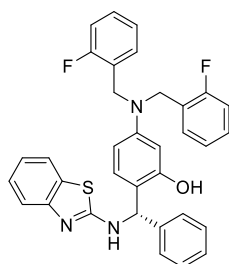

(S)-3o

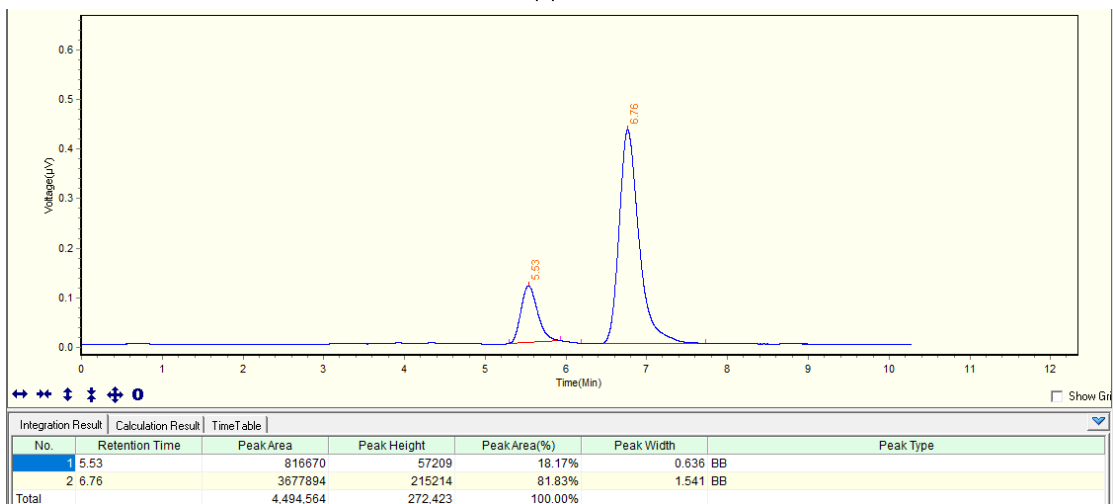



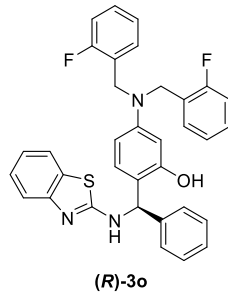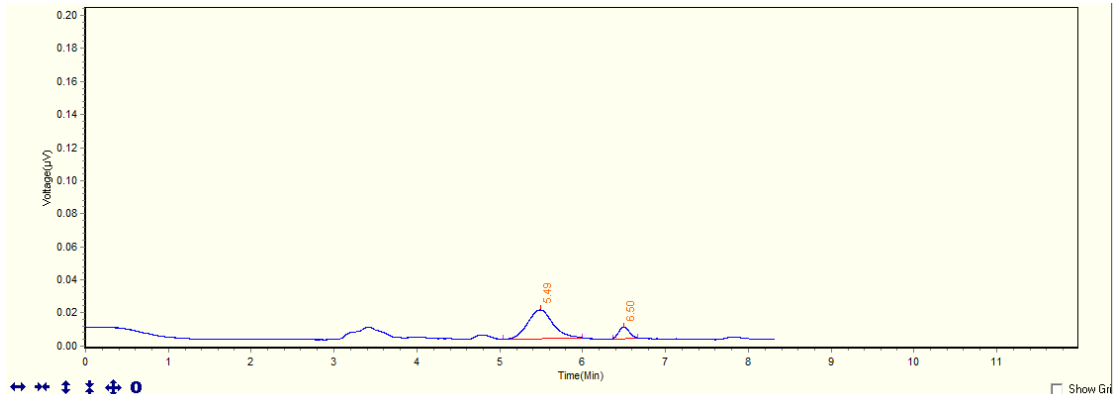

| No.   | Retention Time | Peak Area | Peak Height | Peak Area(%) | Peak Width | Peak Type |
|-------|----------------|-----------|-------------|--------------|------------|-----------|
| 1     | 5.49           | 181612    | 8680        | 85.92%       | 0.946      | BB        |
| 2     | 6.50           | 29772     | 3484        | 14.08%       | 0.298      | BB        |
| Total |                | 211,384   | 12,164      | 100.00%      |            |           |

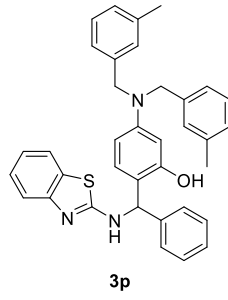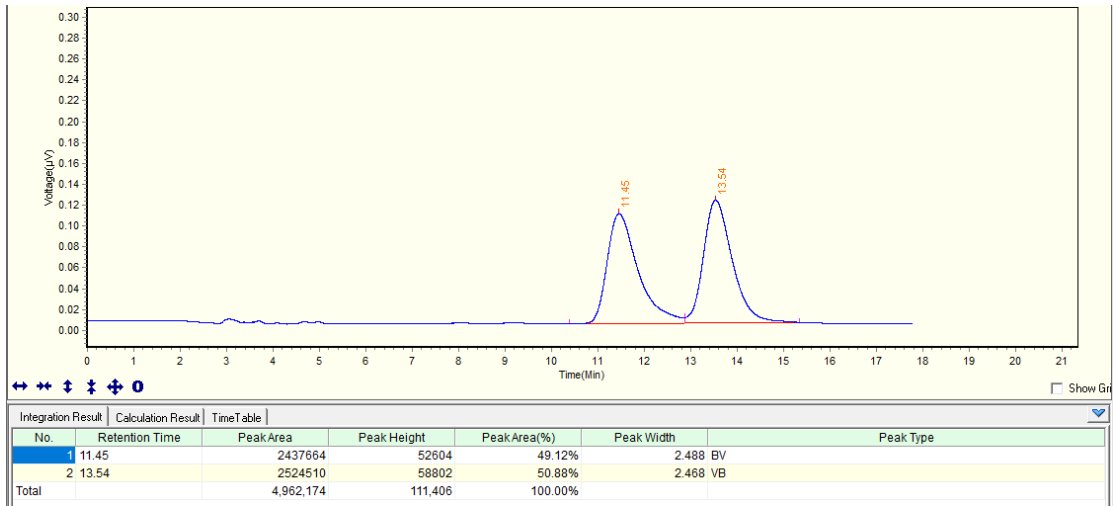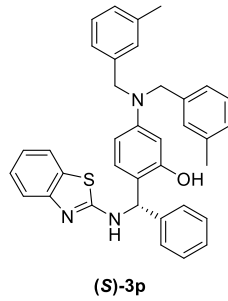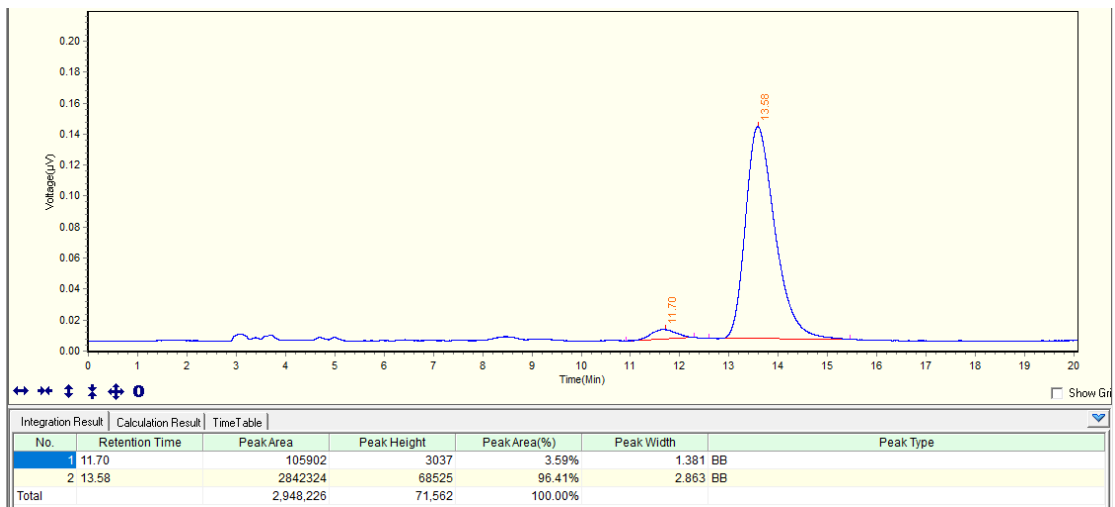

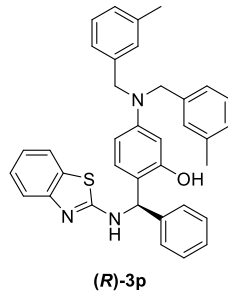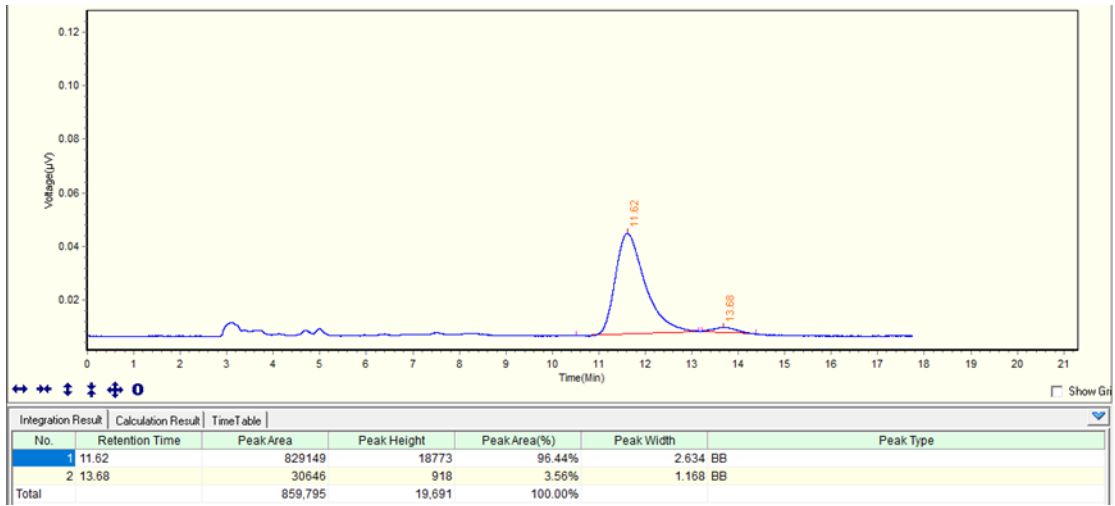

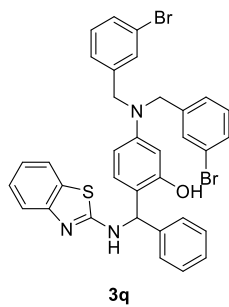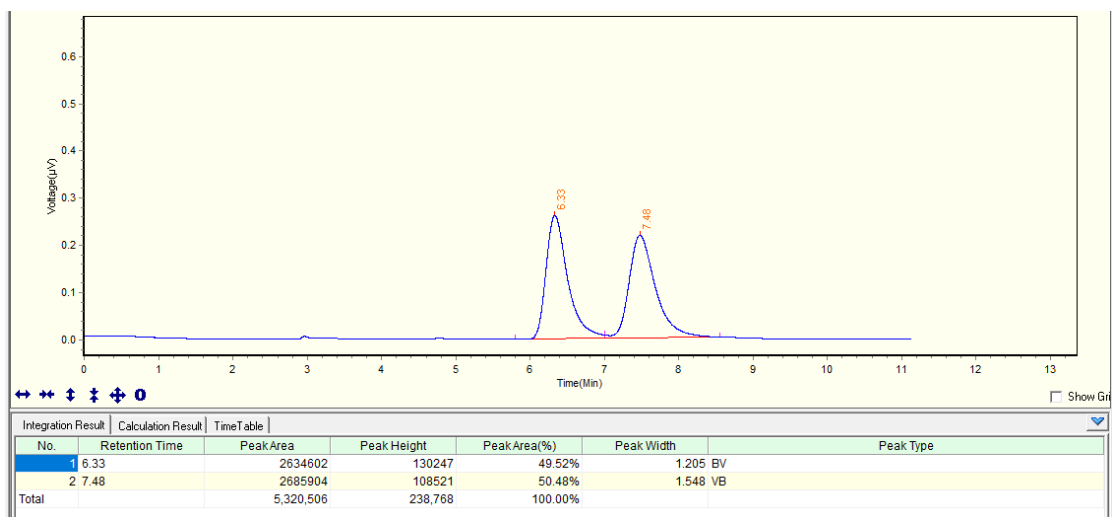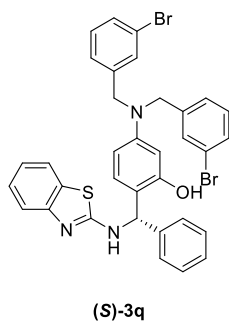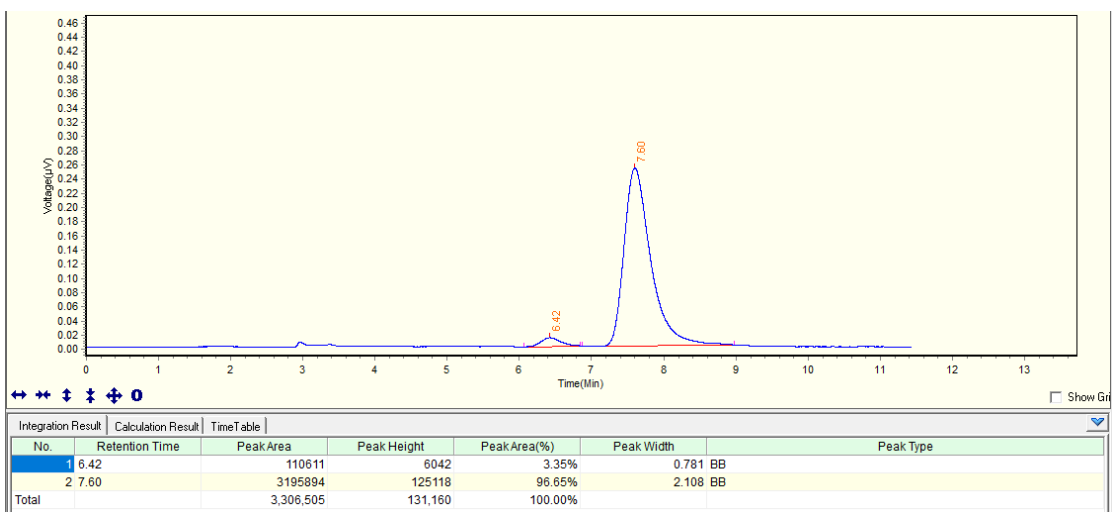

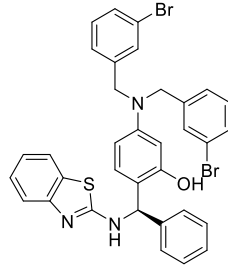

(R)-3q

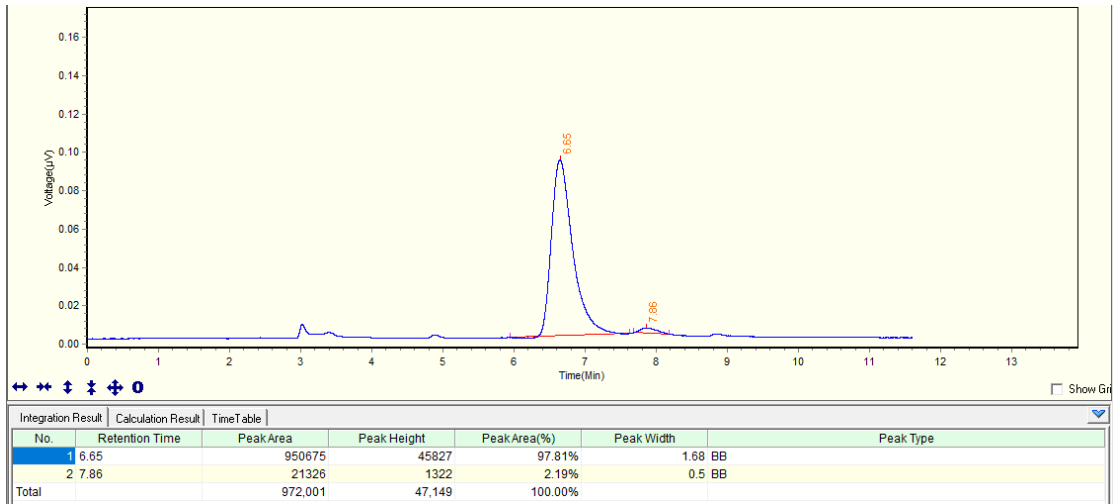

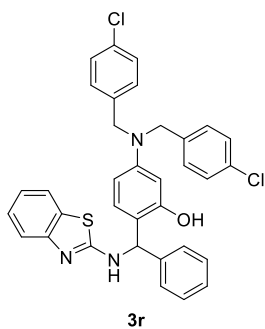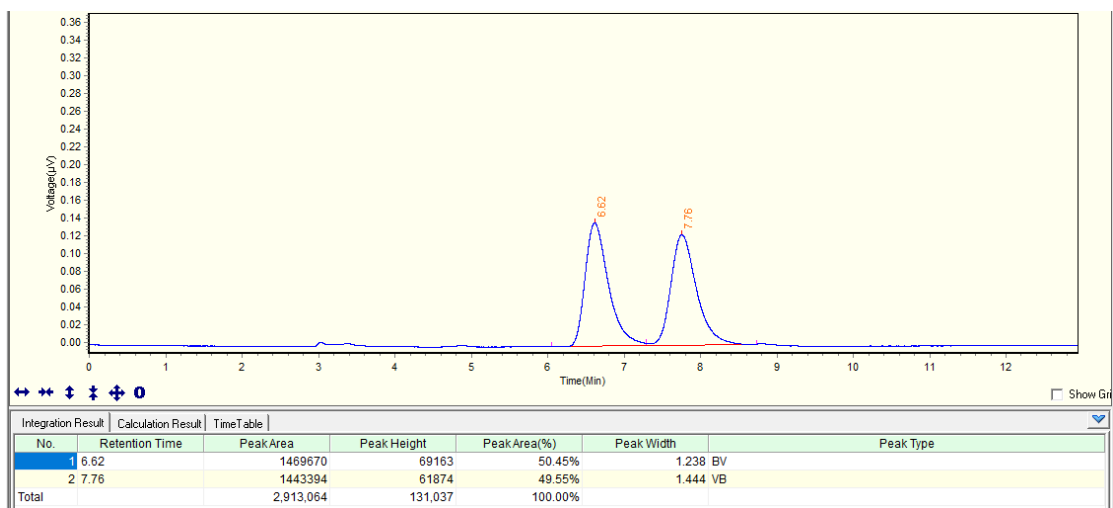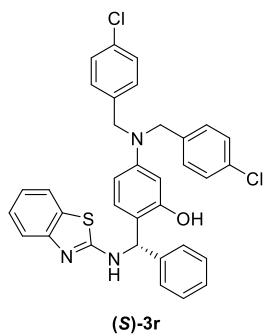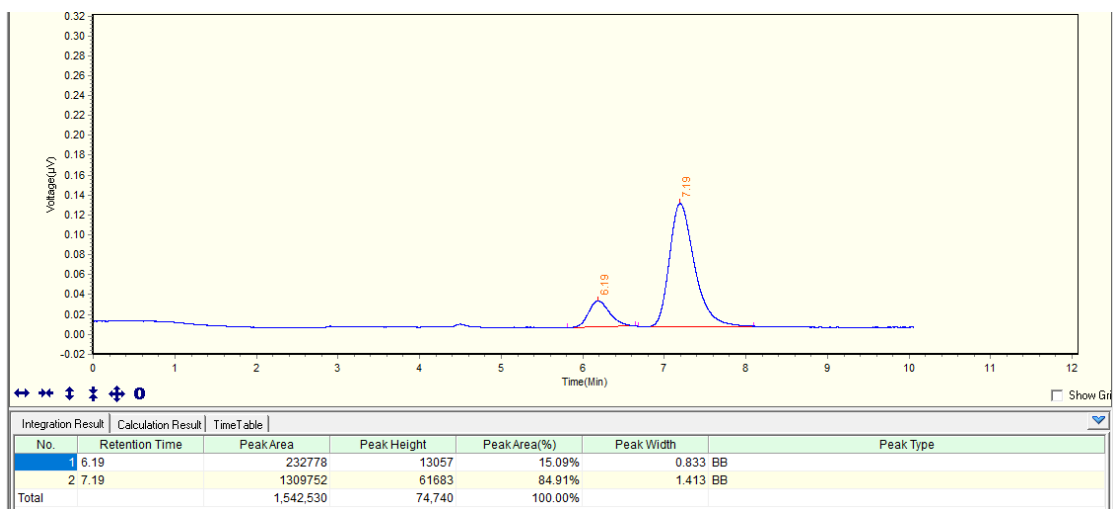

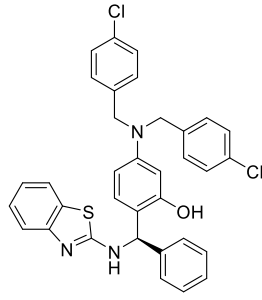

(R)-3r

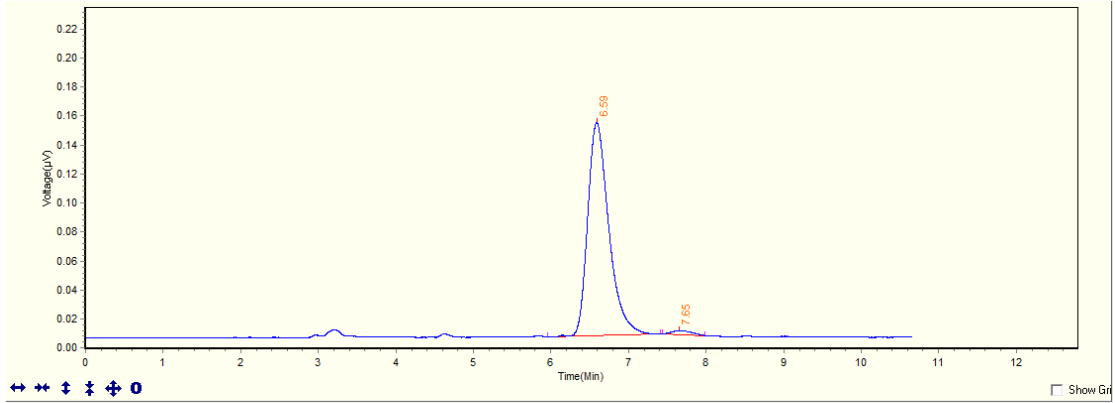

| No.   | Retention Time | Peak Area | Peak Height | Peak Area(%) | Peak Width | Peak Type |
|-------|----------------|-----------|-------------|--------------|------------|-----------|
| 1     | 6.59           | 1388781   | 73424       | 98.18%       | 1.454      | BB        |
| 2     | 7.65           | 25749     | 1381        | 1.82%        | 0.548      | BB        |
| Total |                | 1,414,530 | 74,805      | 100.00%      |            |           |

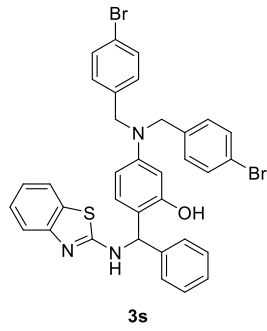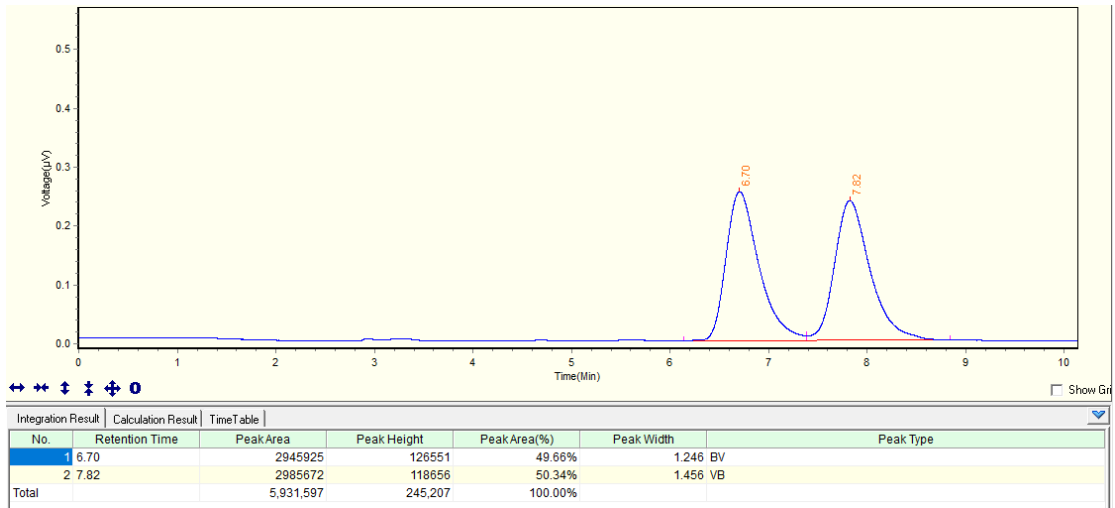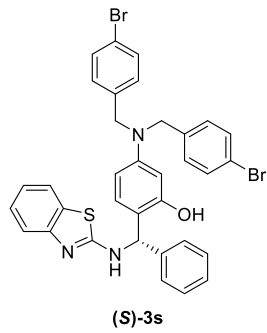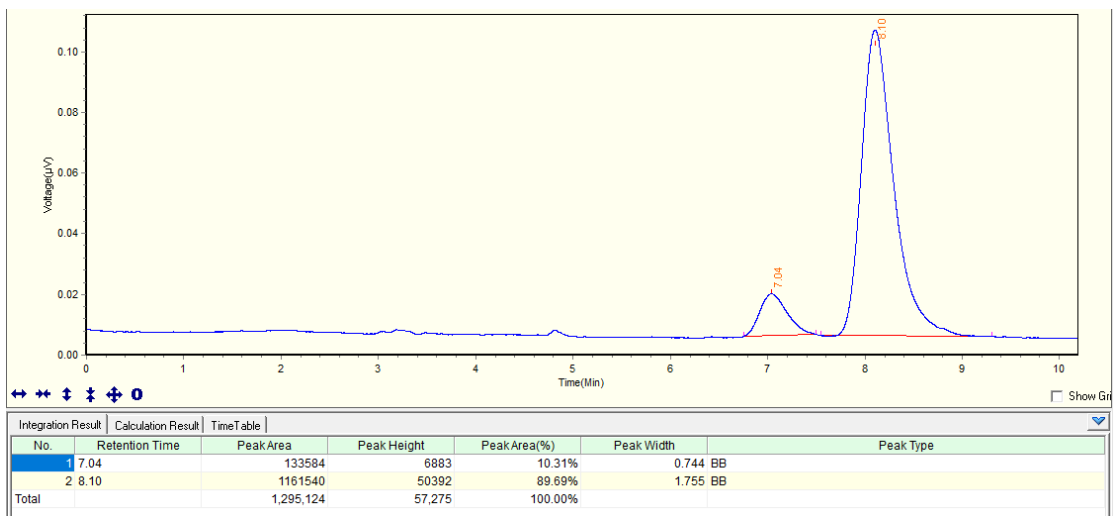



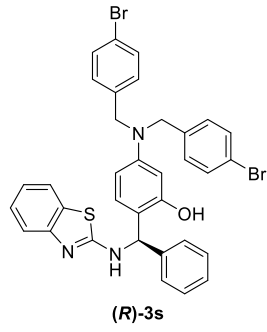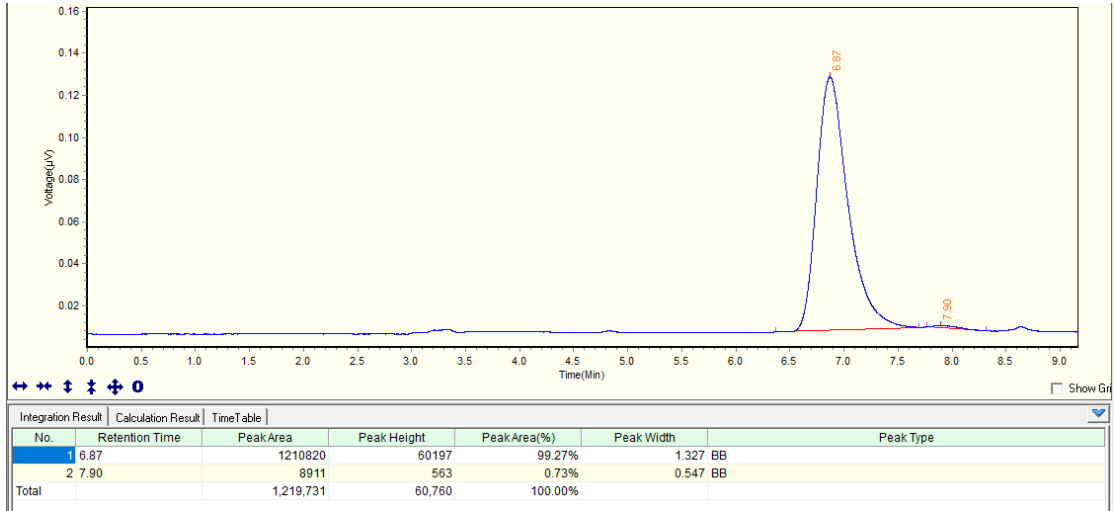

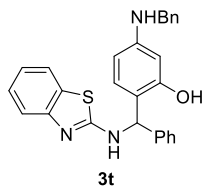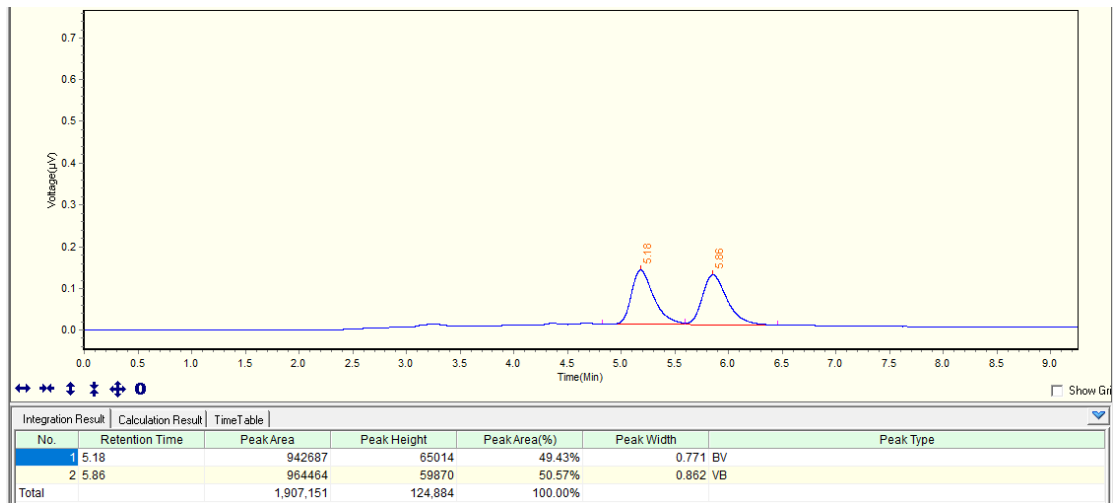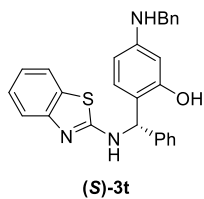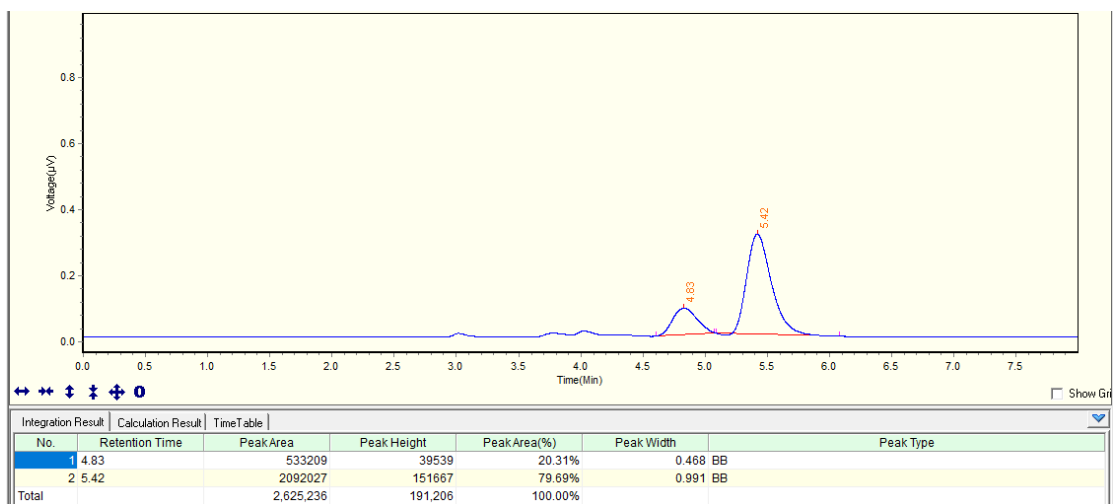

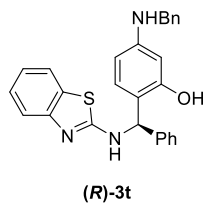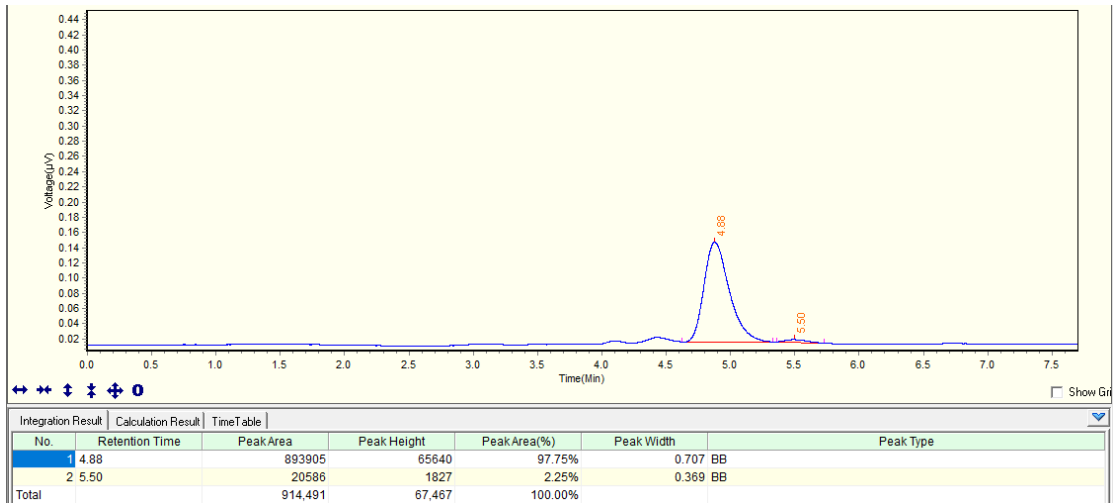

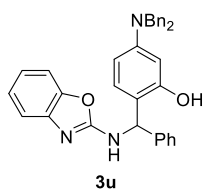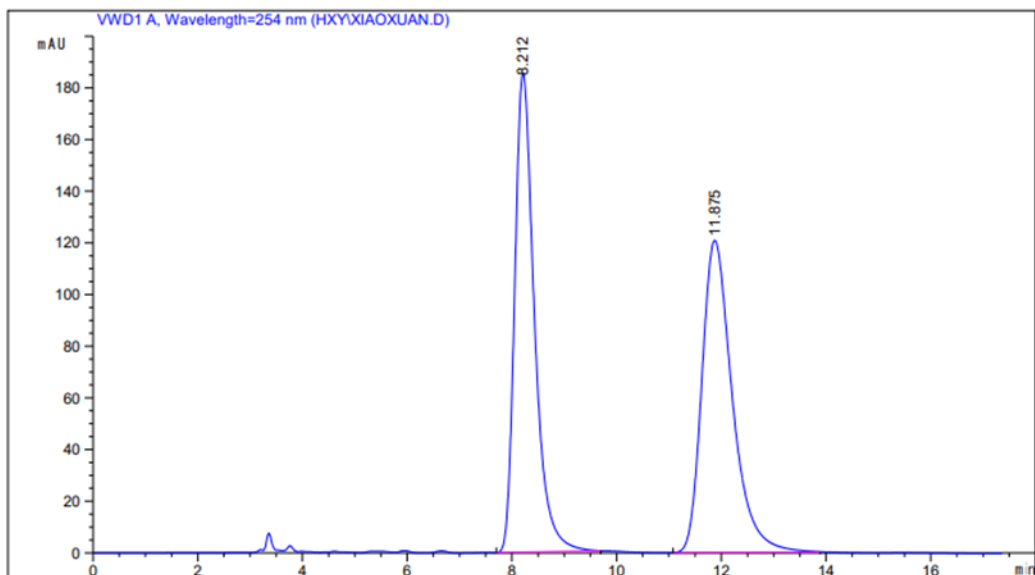

| Peak #   | RetTime [min] | Type | Width [min] | Area mAU *s | Height [mAU] | Area %  |
|----------|---------------|------|-------------|-------------|--------------|---------|
| 1        | 8.212         | BB   | 0.3964      | 4842.37695  | 185.42378    | 49.8242 |
| 2        | 11.875        | BB   | 0.6120      | 4876.53906  | 120.84646    | 50.1758 |
| Totals : |               |      |             | 9718.91602  | 306.27024    |         |

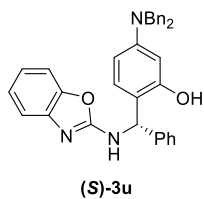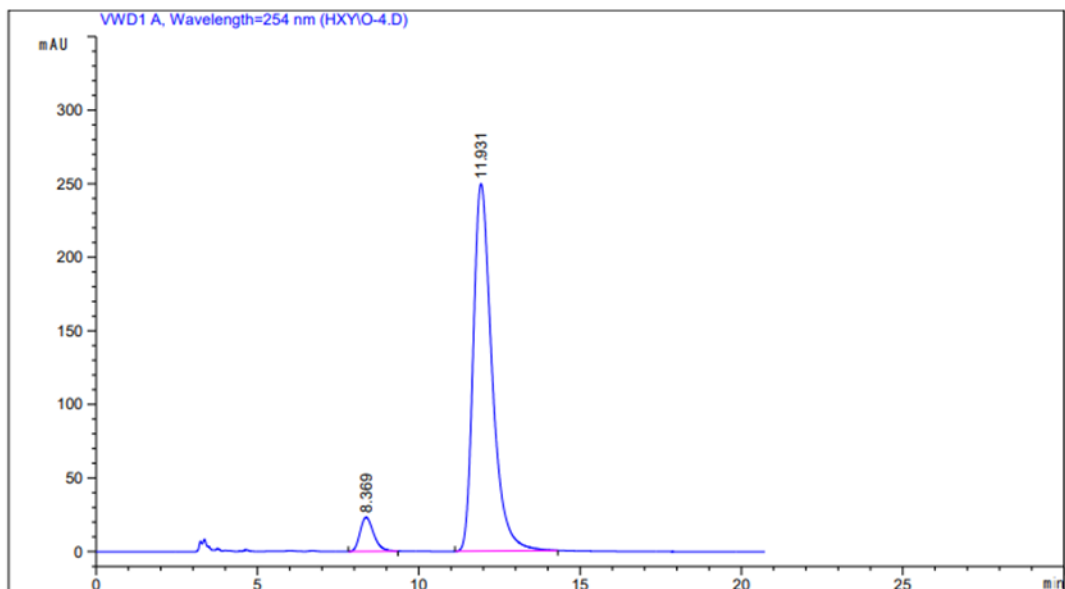

| Peak #   | RetTime [min] | Type | Width [min] | Area mAU *s | Height [mAU] | Area %  |
|----------|---------------|------|-------------|-------------|--------------|---------|
| 1        | 8.369         | BB   | 0.4548      | 679.40326   | 23.13196     | 6.3273  |
| 2        | 11.931        | BB   | 0.6128      | 1.00583e4   | 249.63490    | 93.6727 |
| Totals : |               |      |             | 1.07377e4   | 272.76686    |         |

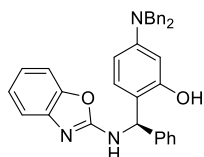

(R)-3u

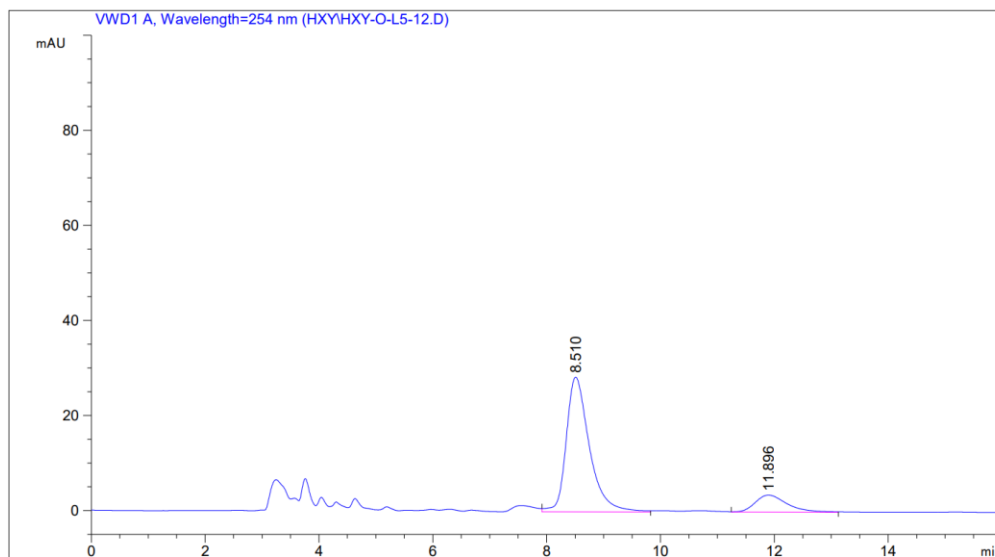

| Peak #   | RetTime [min] | Type | Width [min] | Area mAU  | Area *s | Height [mAU] | Area %  |
|----------|---------------|------|-------------|-----------|---------|--------------|---------|
| 1        | 8.510         | VB   | 0.4299      | 803.63519 |         | 28.33875     | 85.2110 |
| 2        | 11.896        | VB   | 0.5937      | 139.47687 |         | 3.58478      | 14.7890 |
| Totals : |               |      |             | 943.11206 |         | 31.92353     |         |

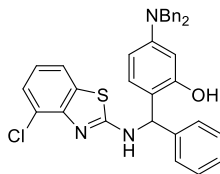

3v

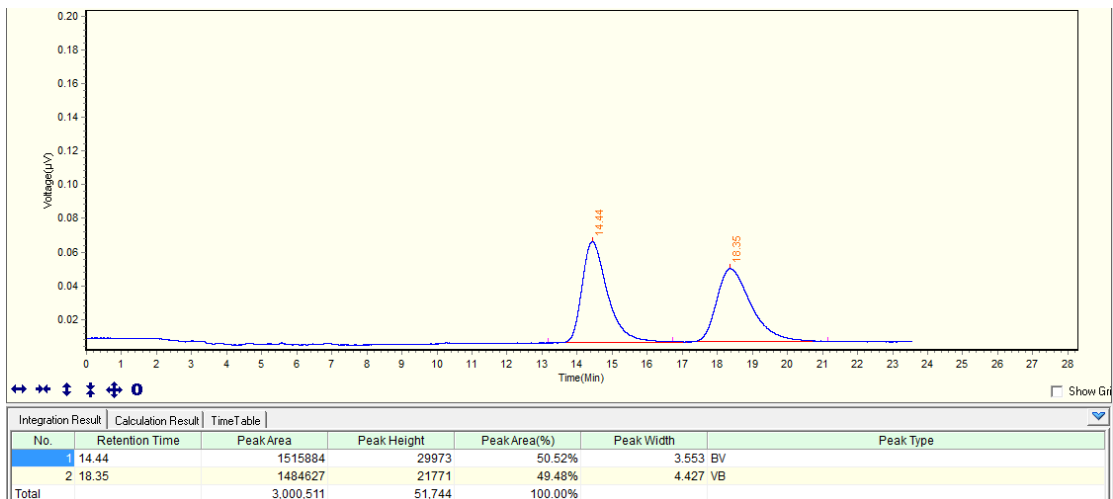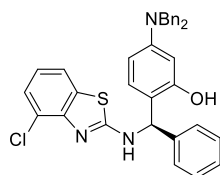

(R)-3v

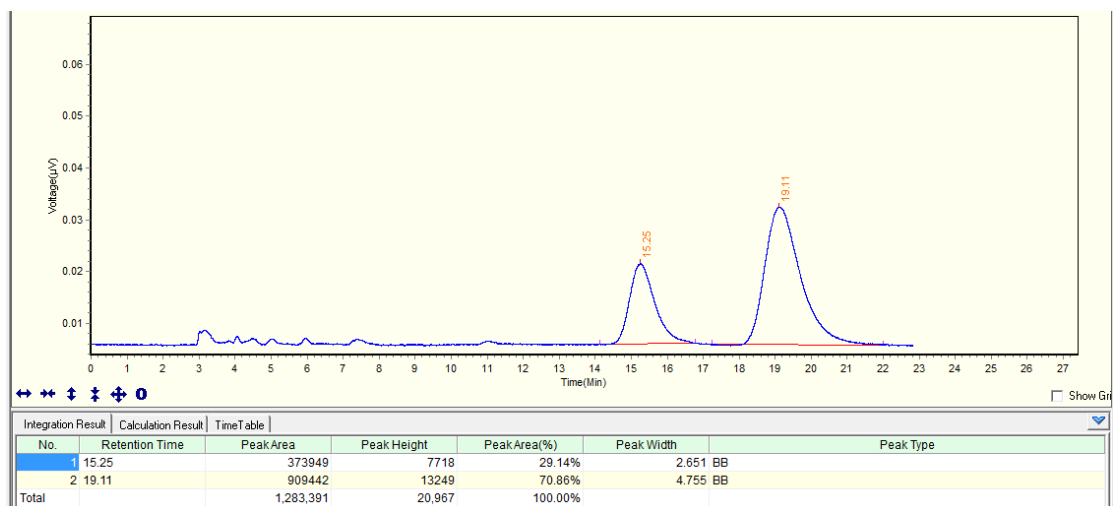

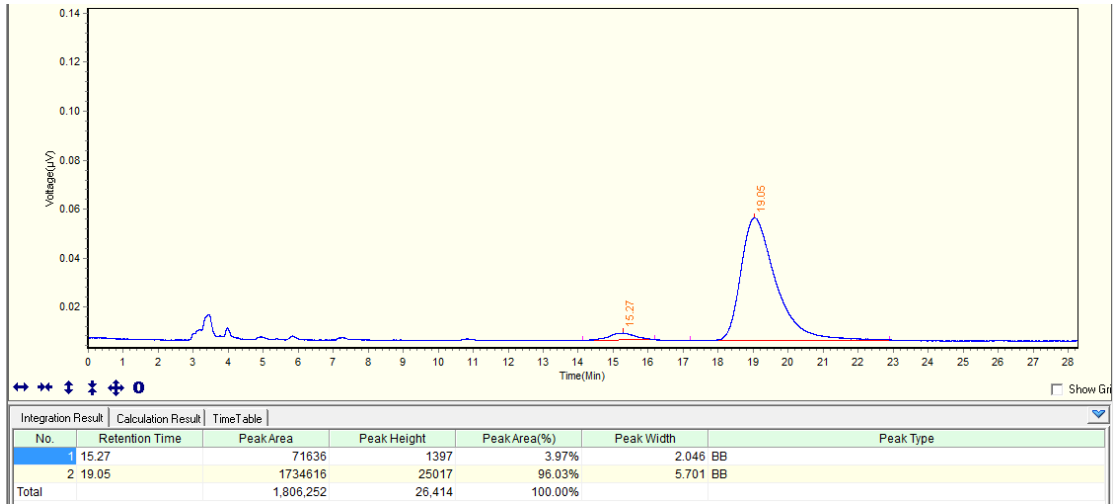



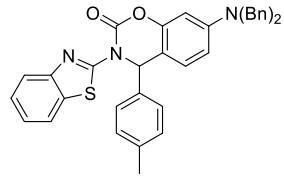

3b'

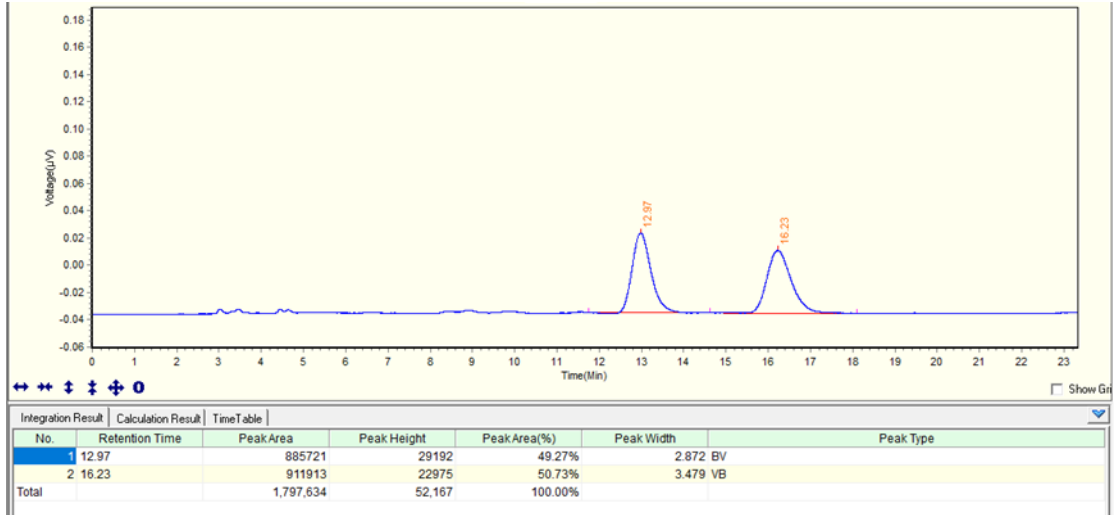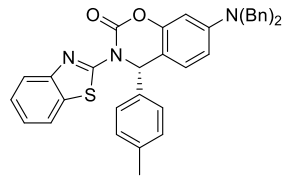

(S)-3b'

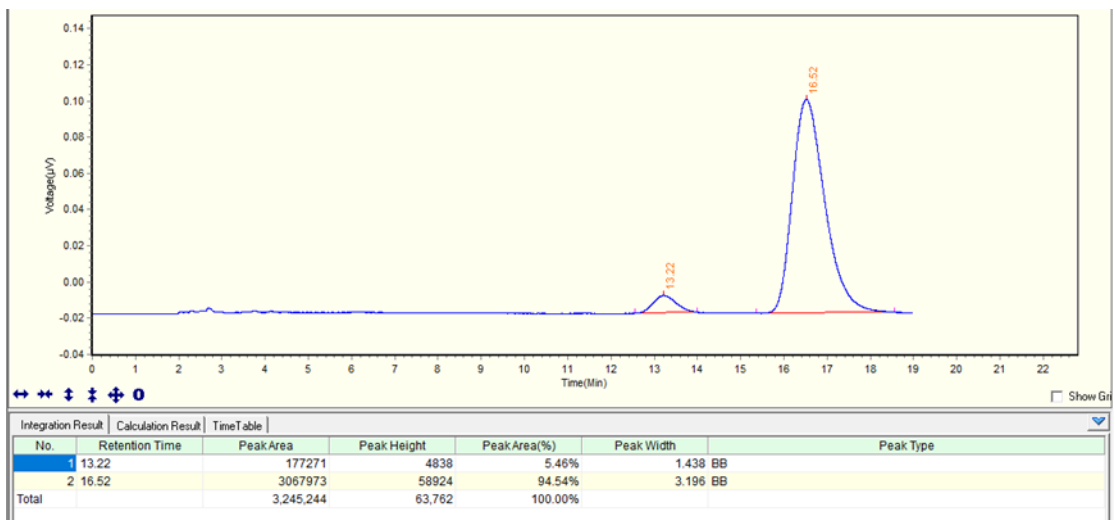

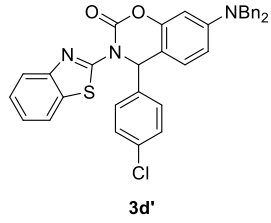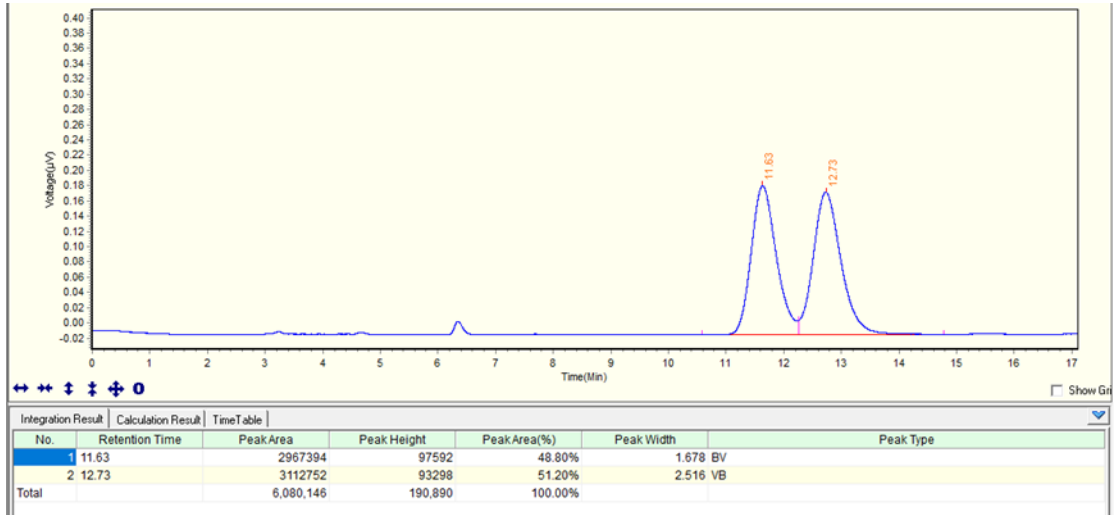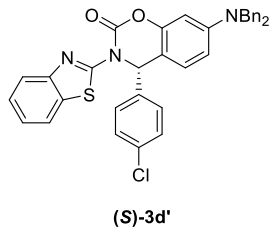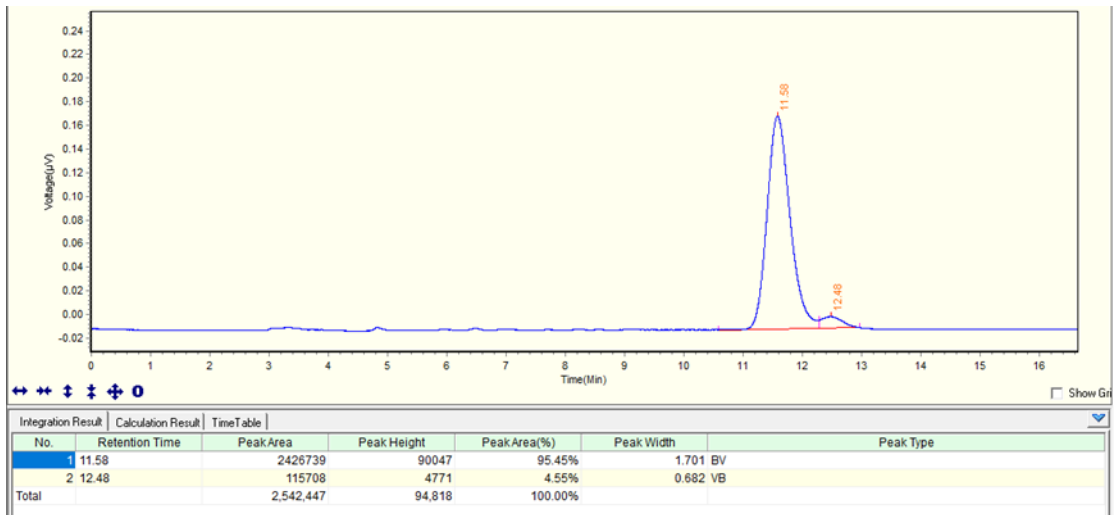

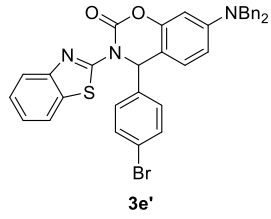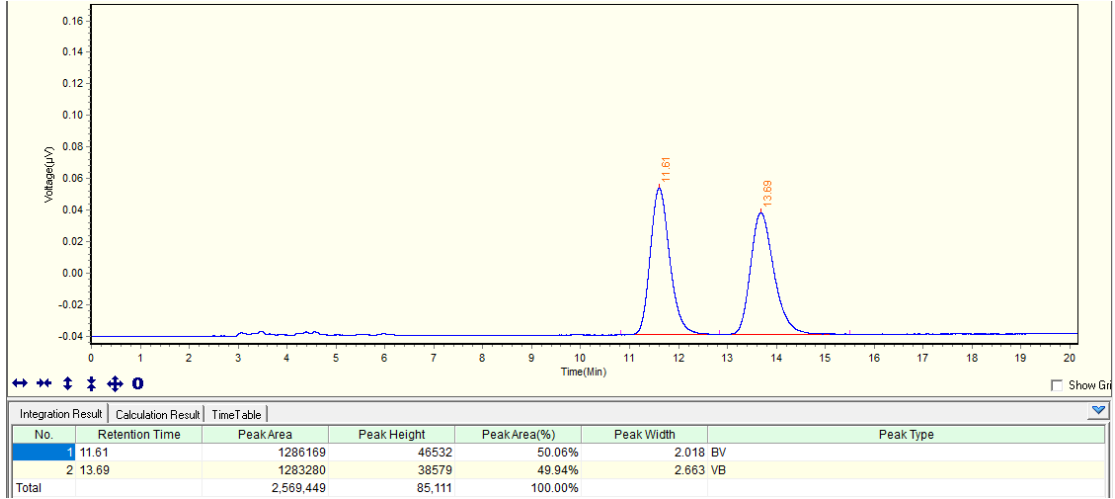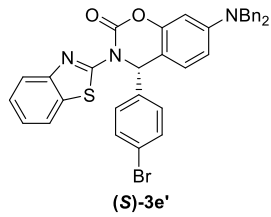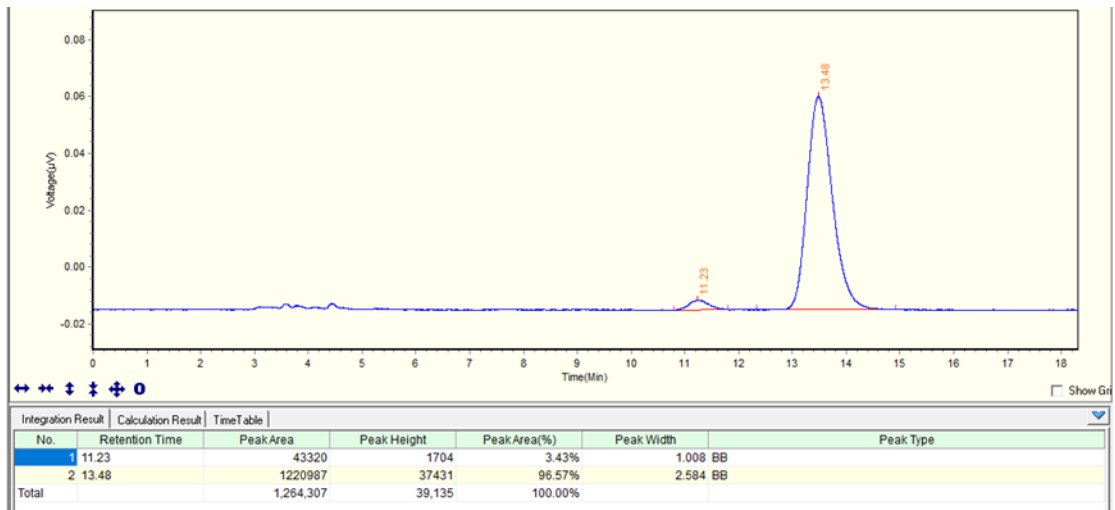

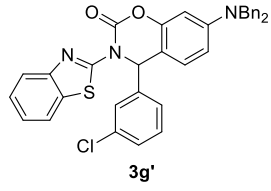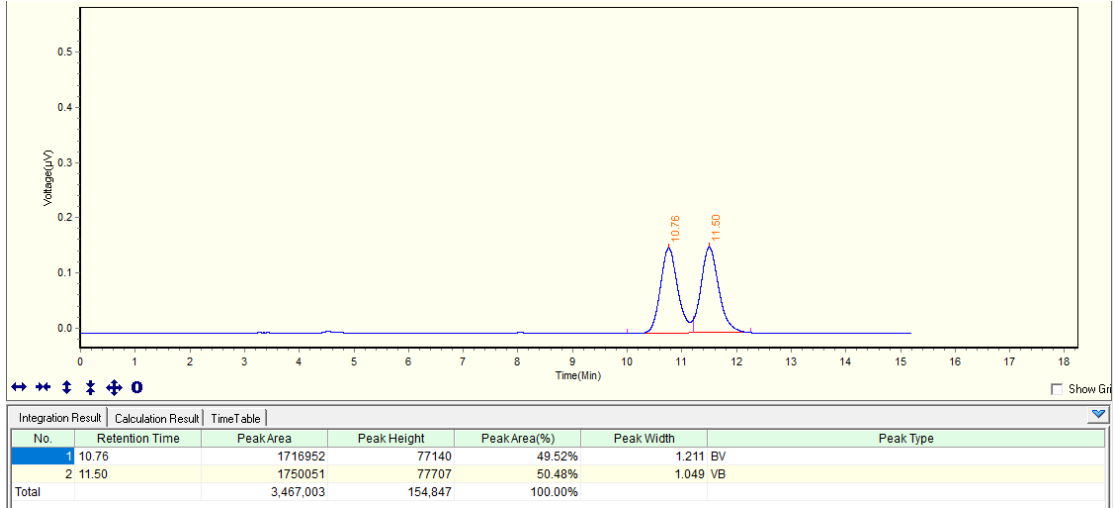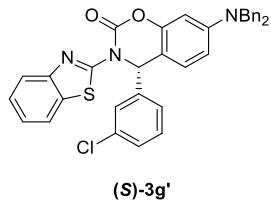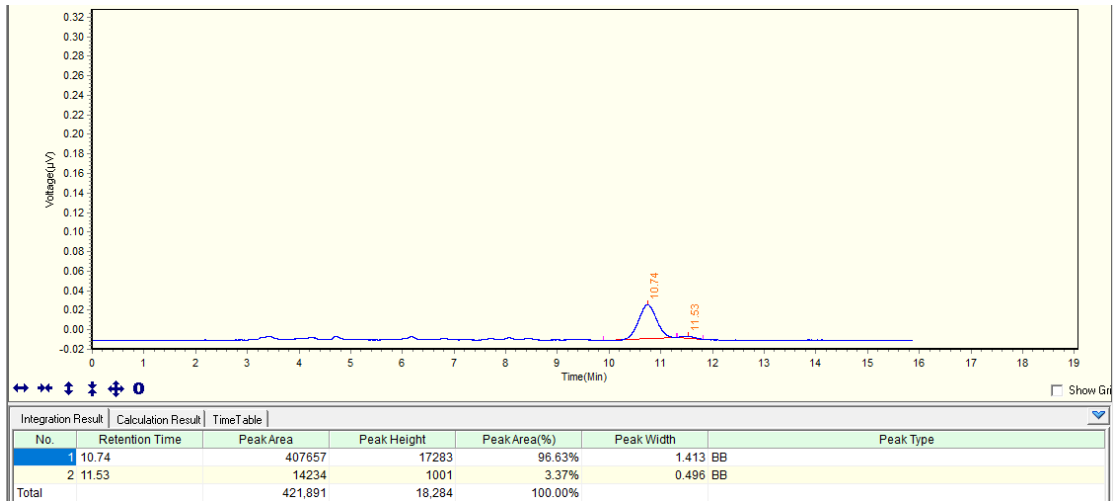

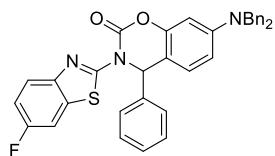

3m'

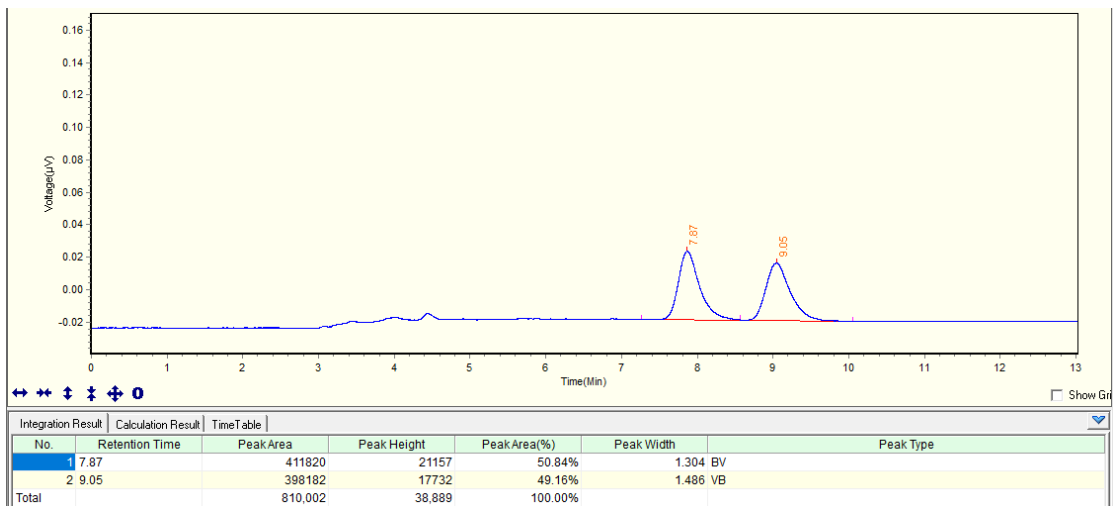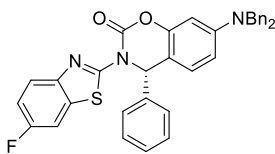

(S)-3m'

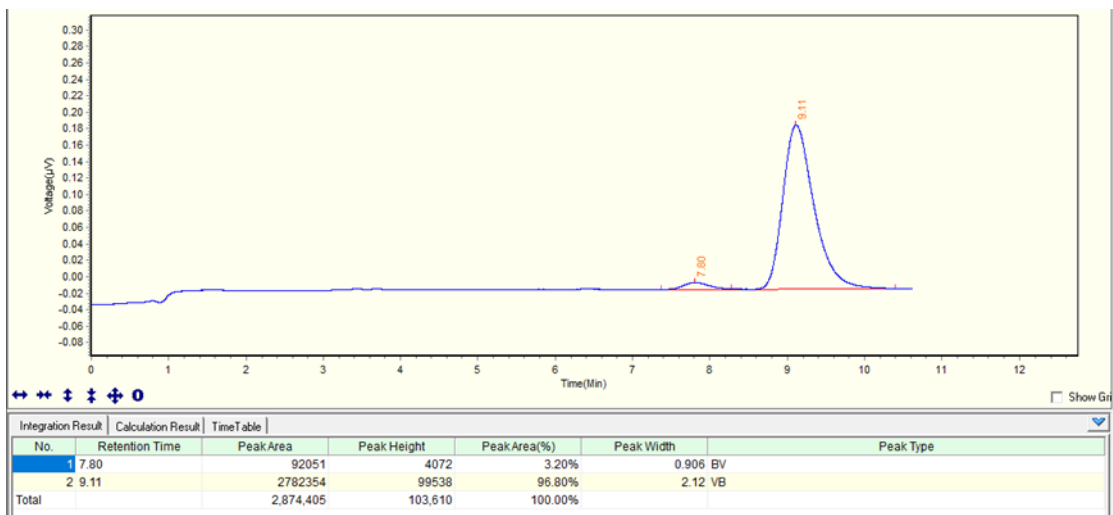

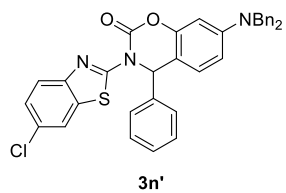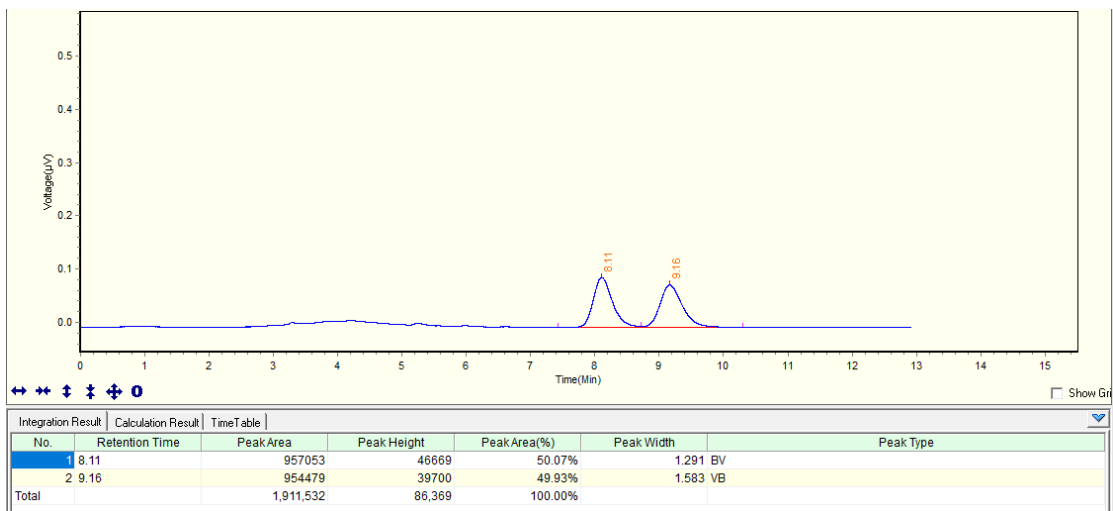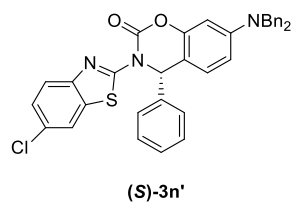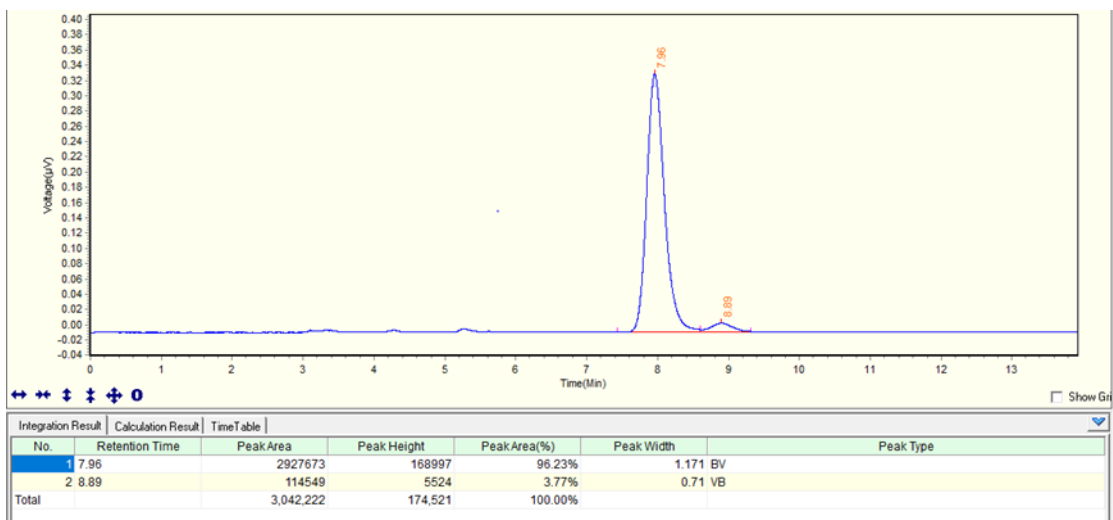

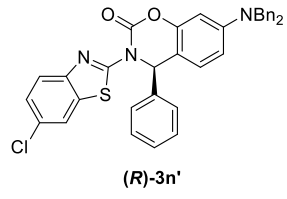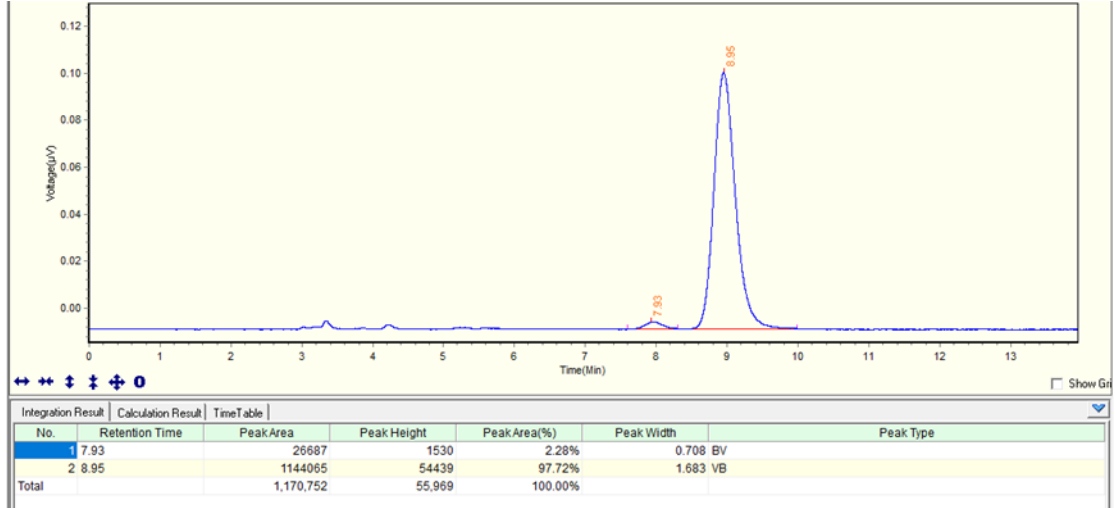

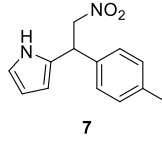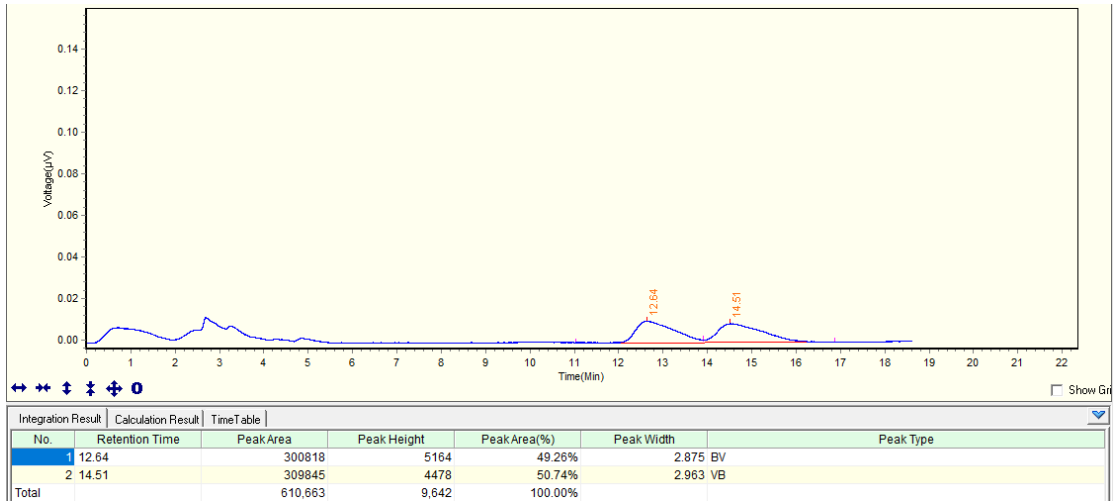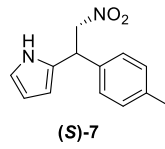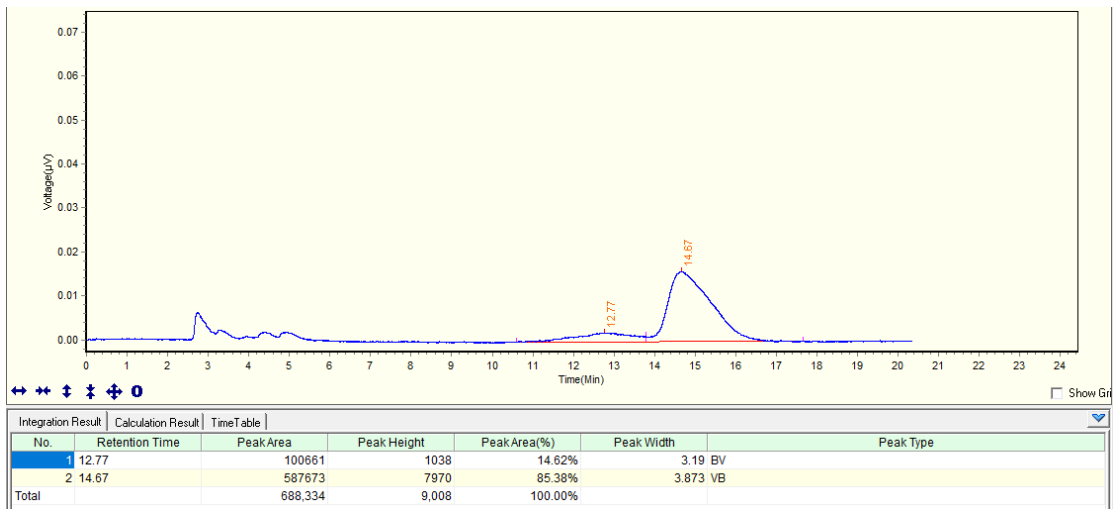



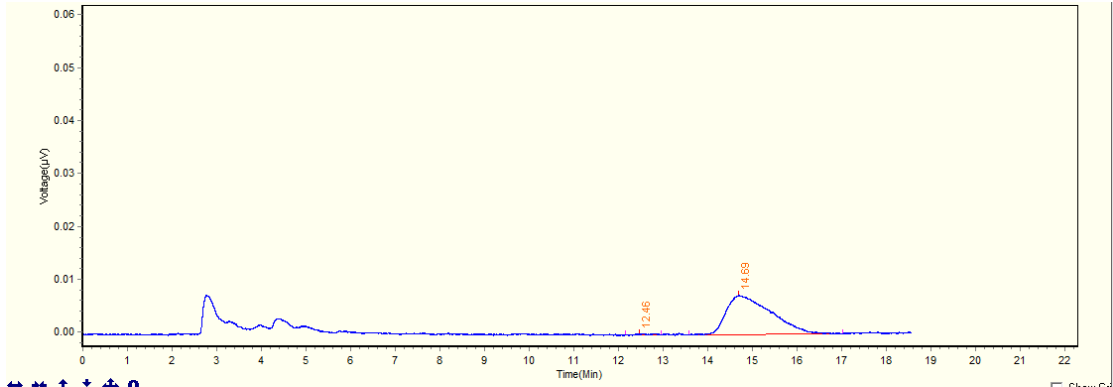

Integration Result | Calculation Result | TimeTable

| No.   | Retention Time | Peak Area | Peak Height | Peak Area(%) | Peak Width | Peak Type |
|-------|----------------|-----------|-------------|--------------|------------|-----------|
| 1     | 12.46          | 1339      | 105         | 0.52%        | 0.786      | BB        |
| 2     | 14.69          | 255335    | 3681        | 99.48%       | 3.433      | BB        |
| Total |                | 256,674   | 3,786       | 100.00%      |            |           |

## 10. NMR Spectra

$^1\text{H}$  NMR spectrum of compound **3a** (DMSO, 400 MHz)

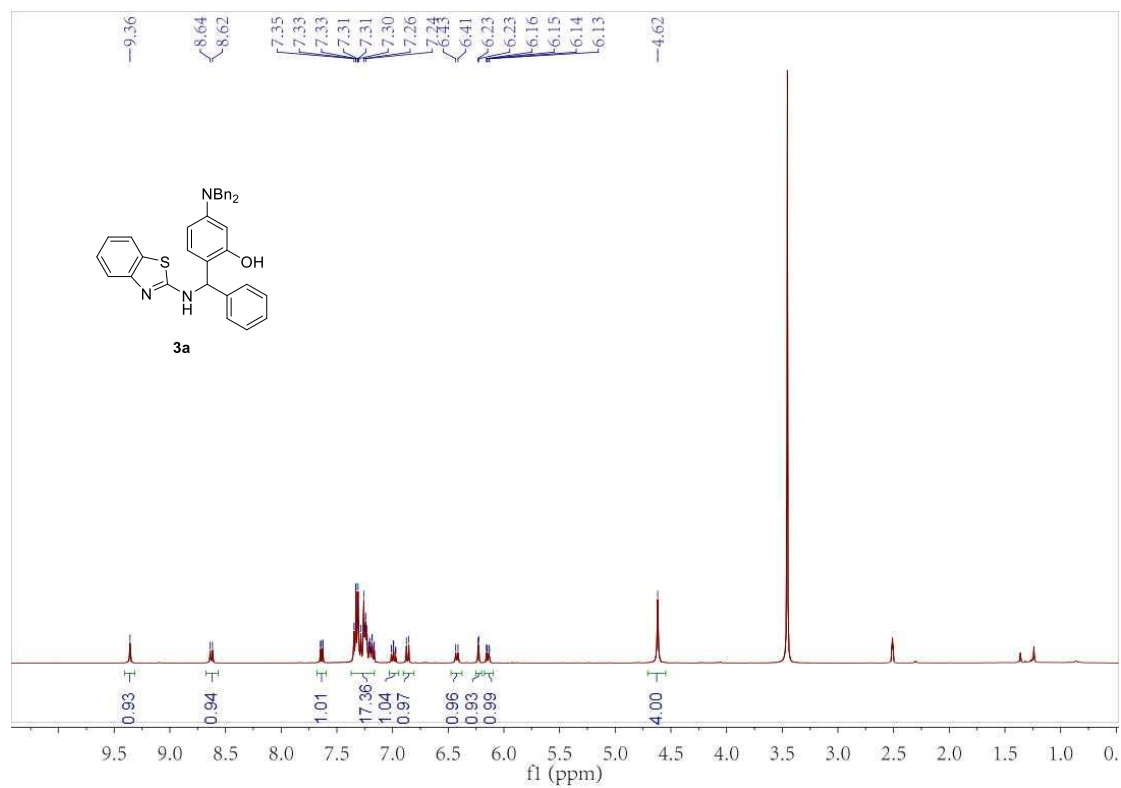

$^{13}\text{C}$  NMR spectrum of compound **3a** (DMSO, 100 MHz)

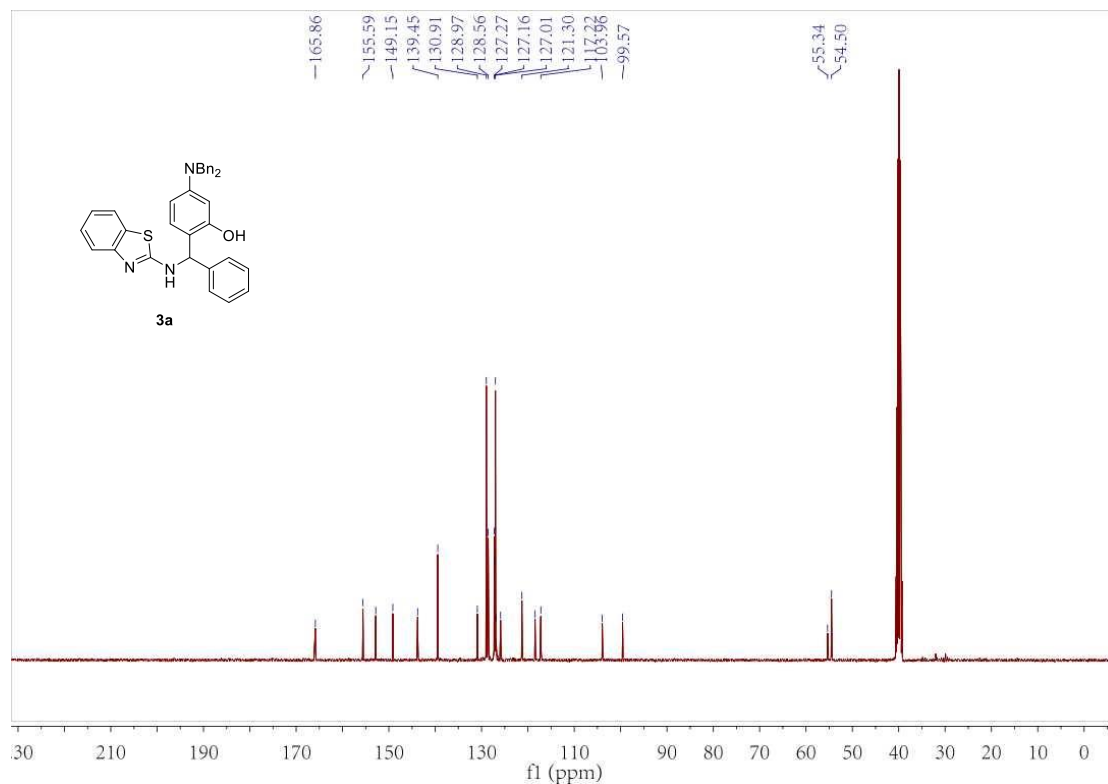

<sup>1</sup>H NMR spectrum of compound **3b** (DMSO, 400 MHz)

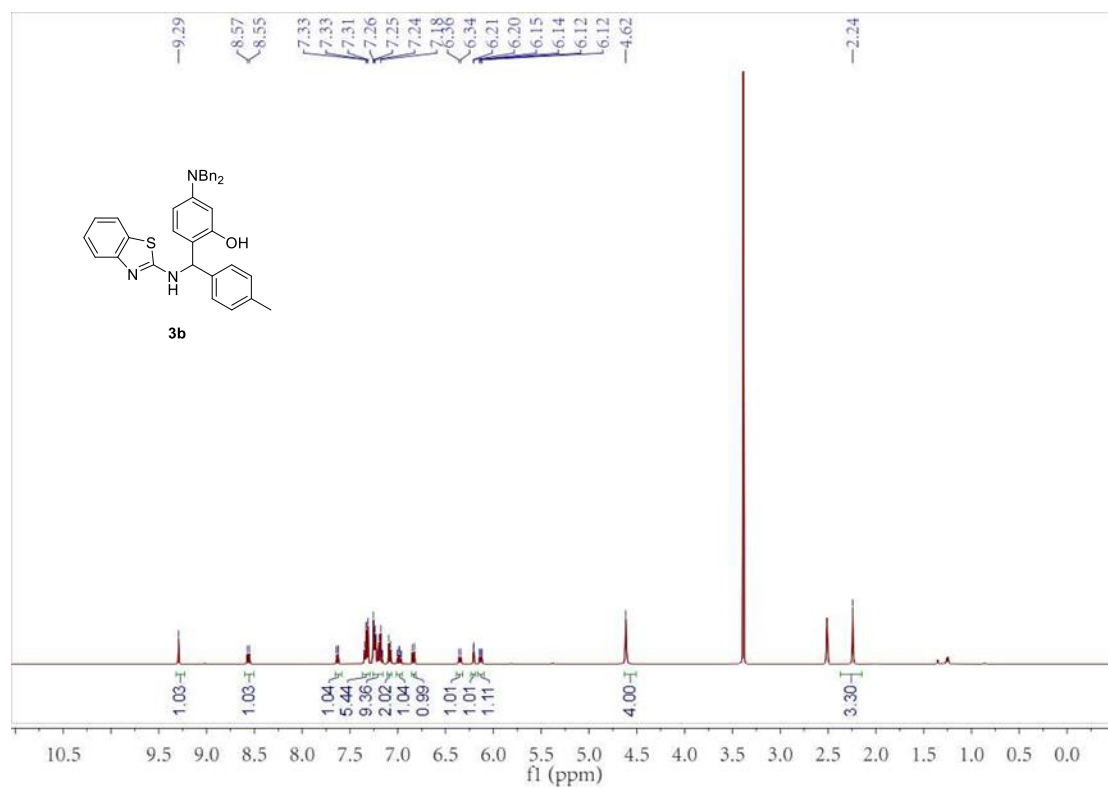

<sup>13</sup>C NMR spectrum of compound **3b** (DMSO, 100 MHz)

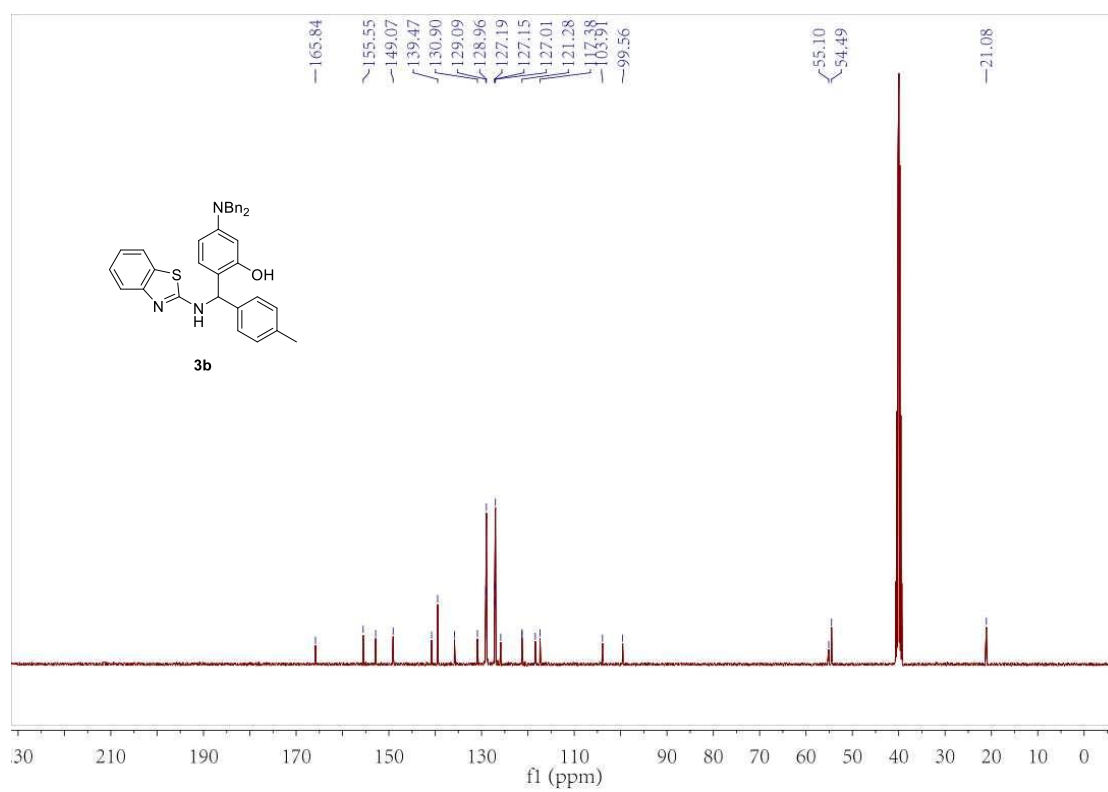

<sup>1</sup>H NMR spectrum of compound **3c** (DMSO, 400 MHz)

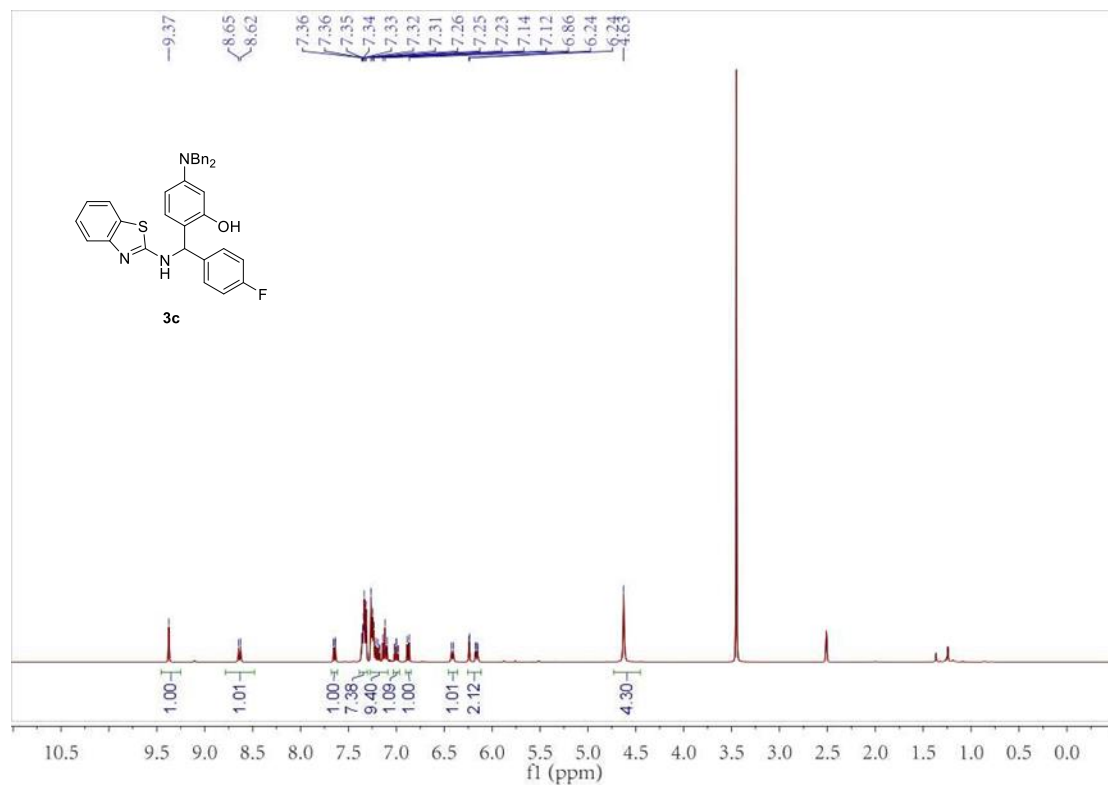

<sup>13</sup>C NMR spectrum of compound **3c** (DMSO, 100 MHz)

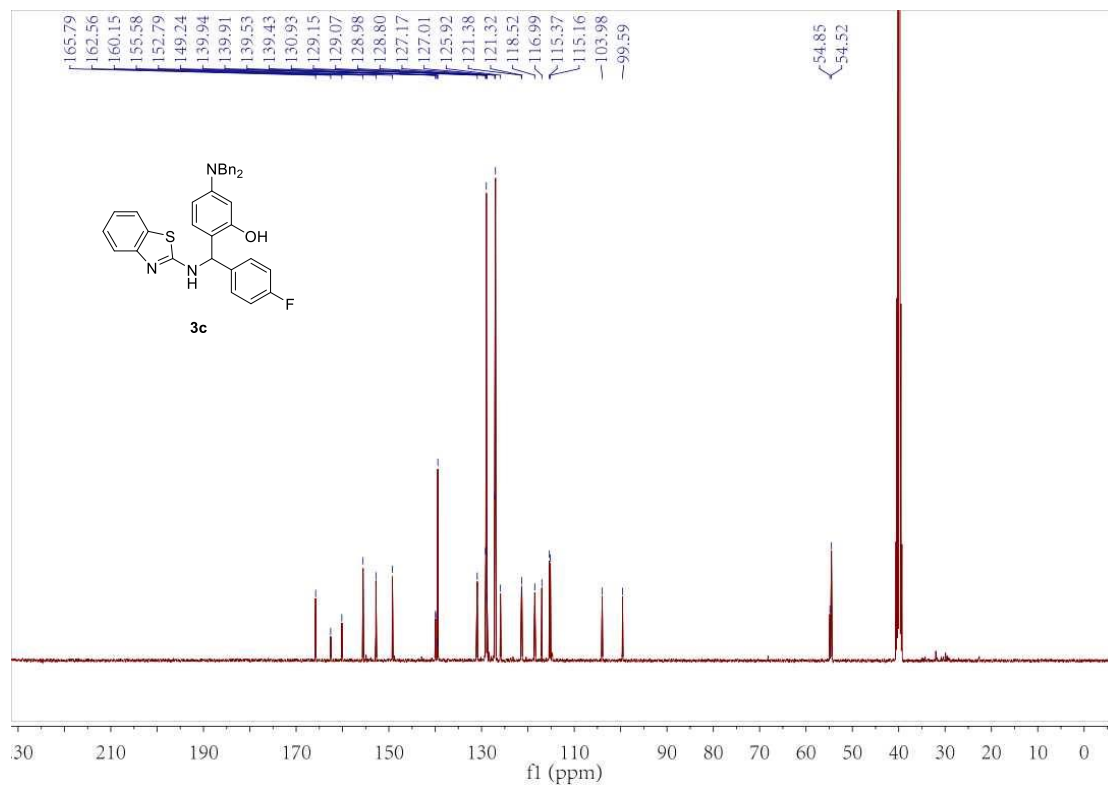

$^{19}\text{F}$  NMR spectrum of compound **3c** (DMSO, 376 MHz)

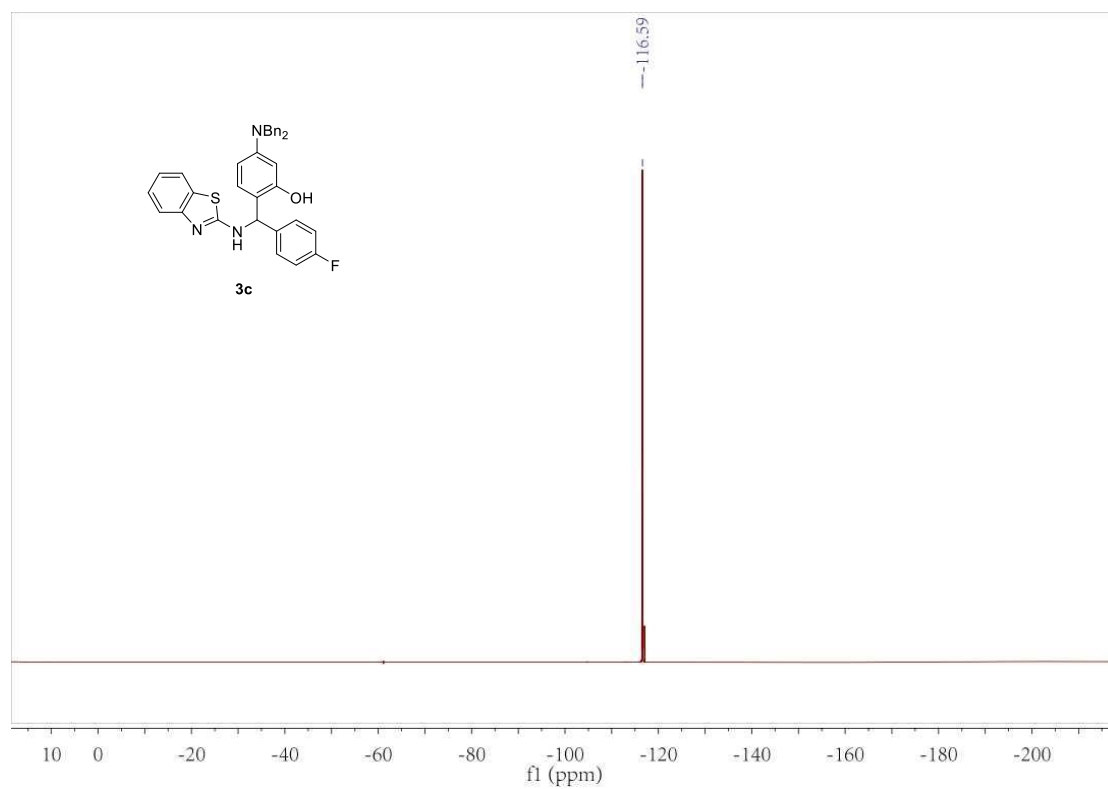

<sup>1</sup>H NMR spectrum of compound **3d** (DMSO, 400 MHz)

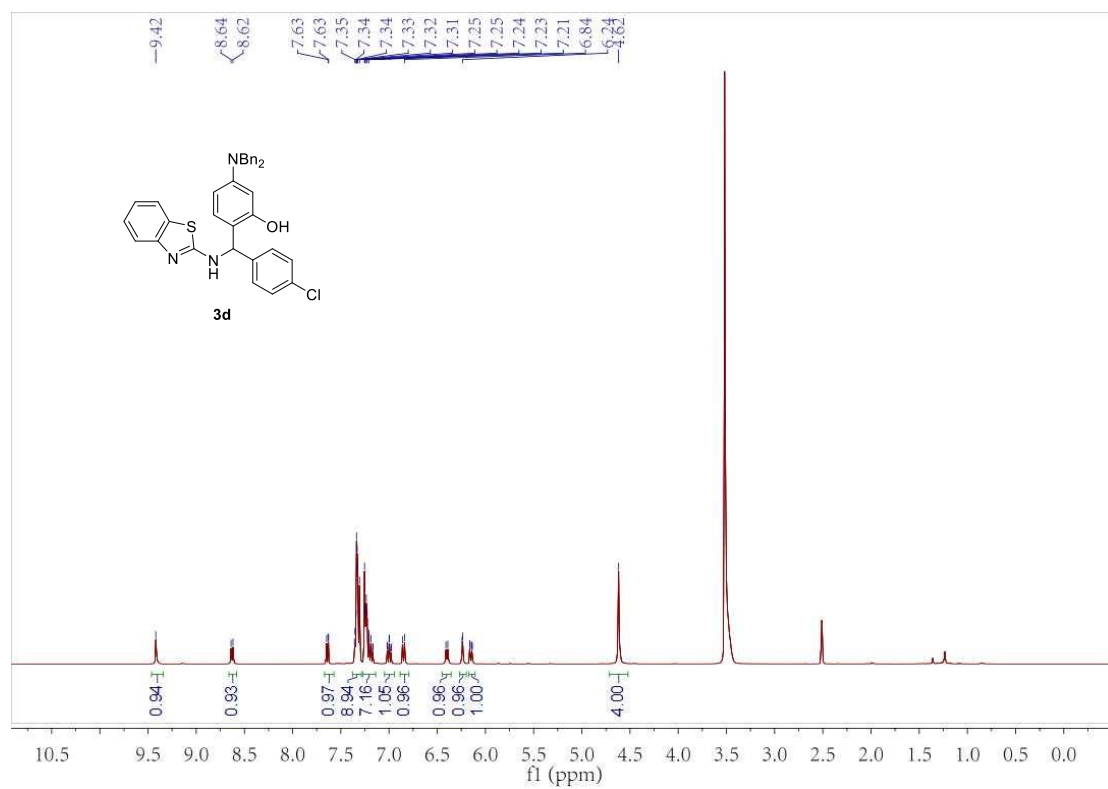

<sup>13</sup>C NMR spectrum of compound **3d** (DMSO, 100 MHz)

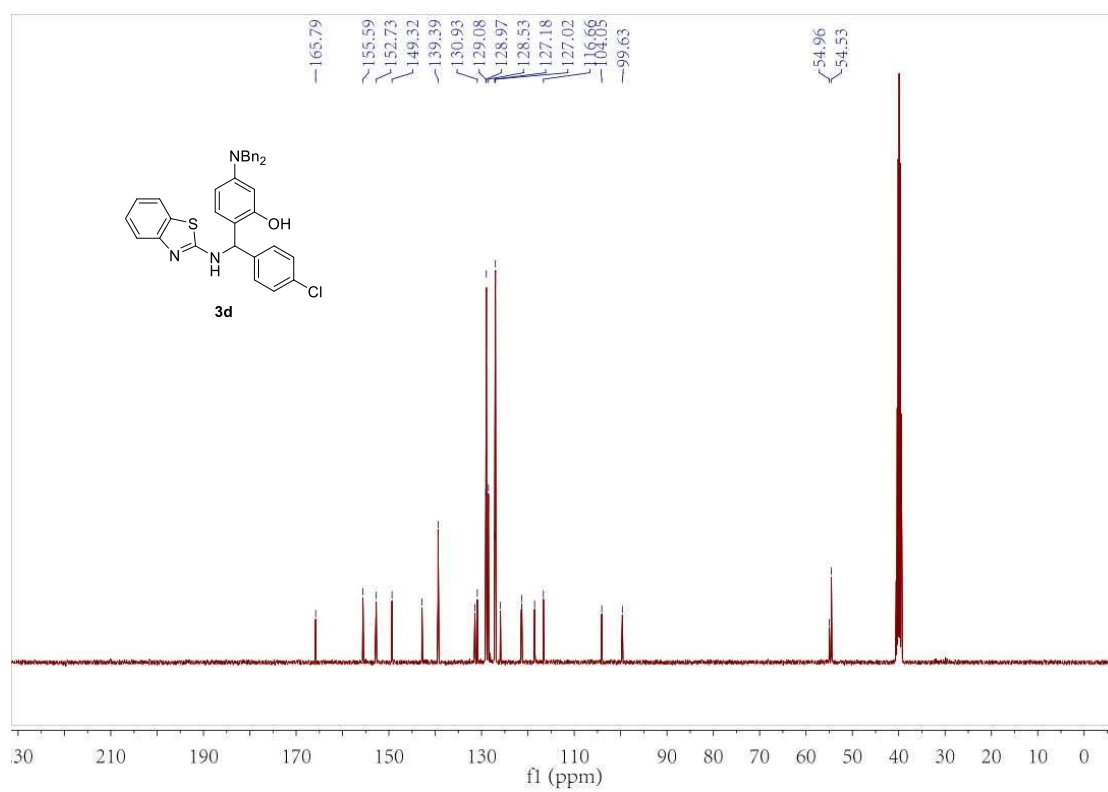

$^1\text{H}$  NMR spectrum of compound **3e** (DMSO, 400 MHz)

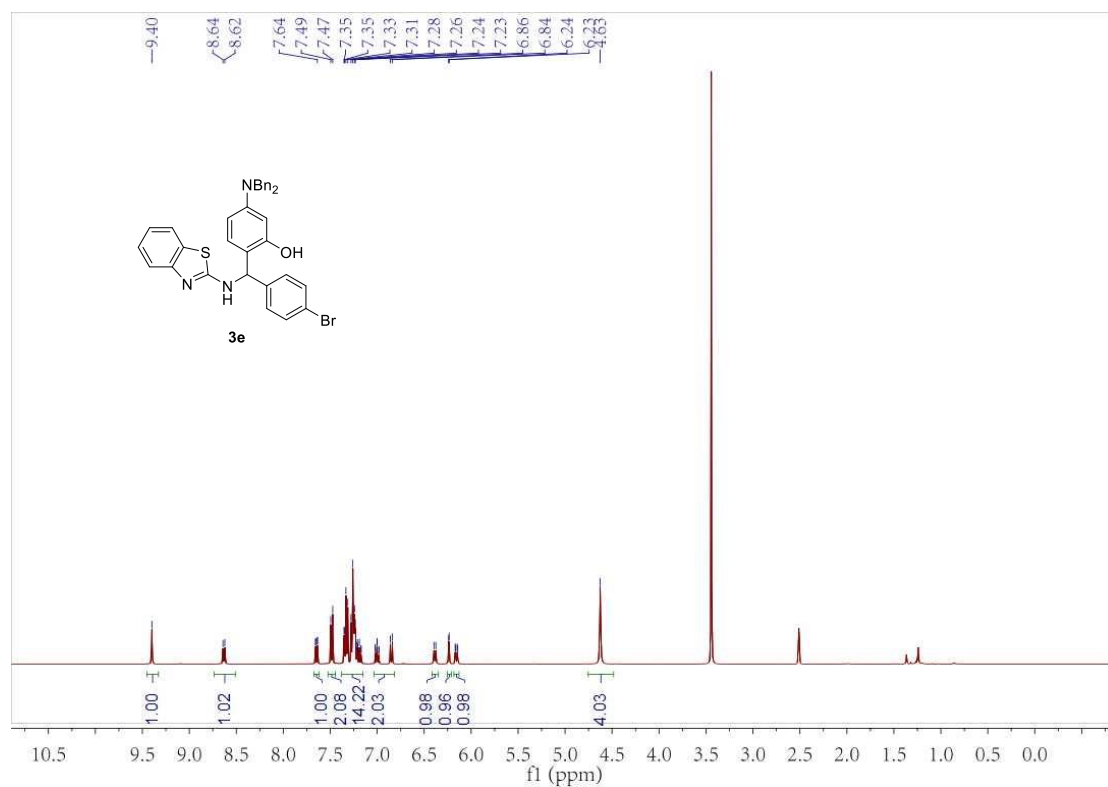

$^{13}\text{C}$  NMR spectrum of compound **3e** (DMSO, 100 MHz)

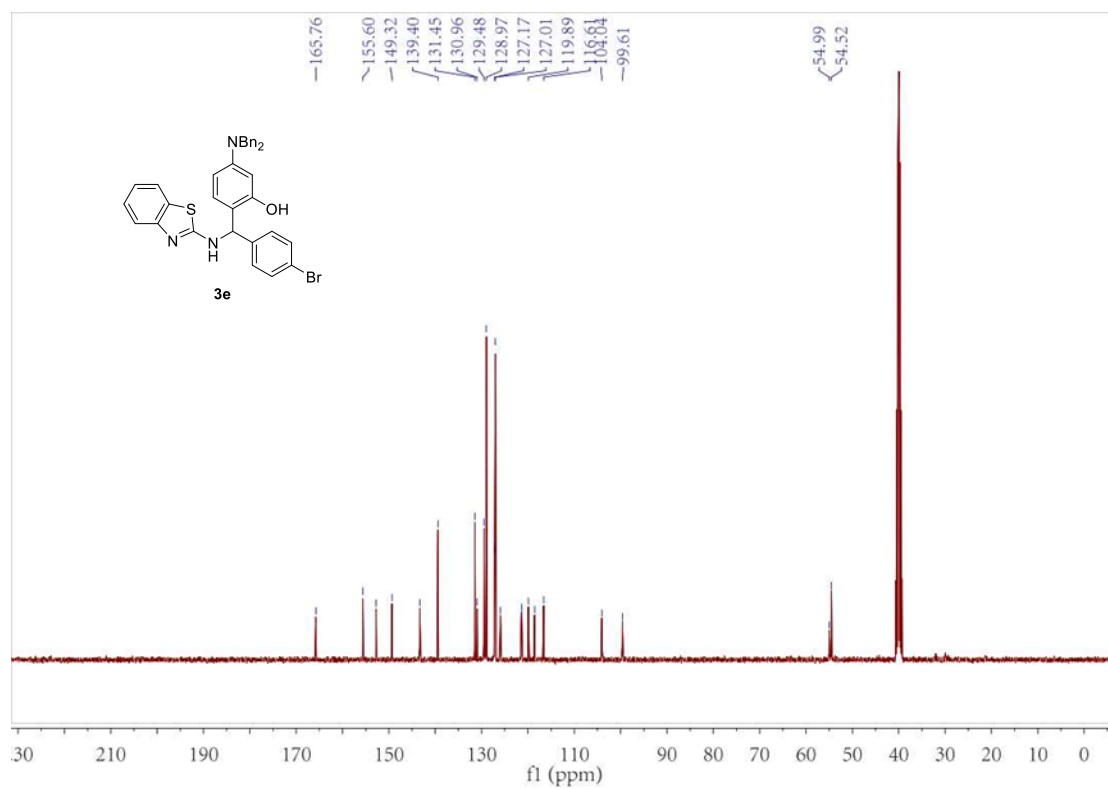

<sup>1</sup>H NMR spectrum of compound **3f** (DMSO, 400 MHz)

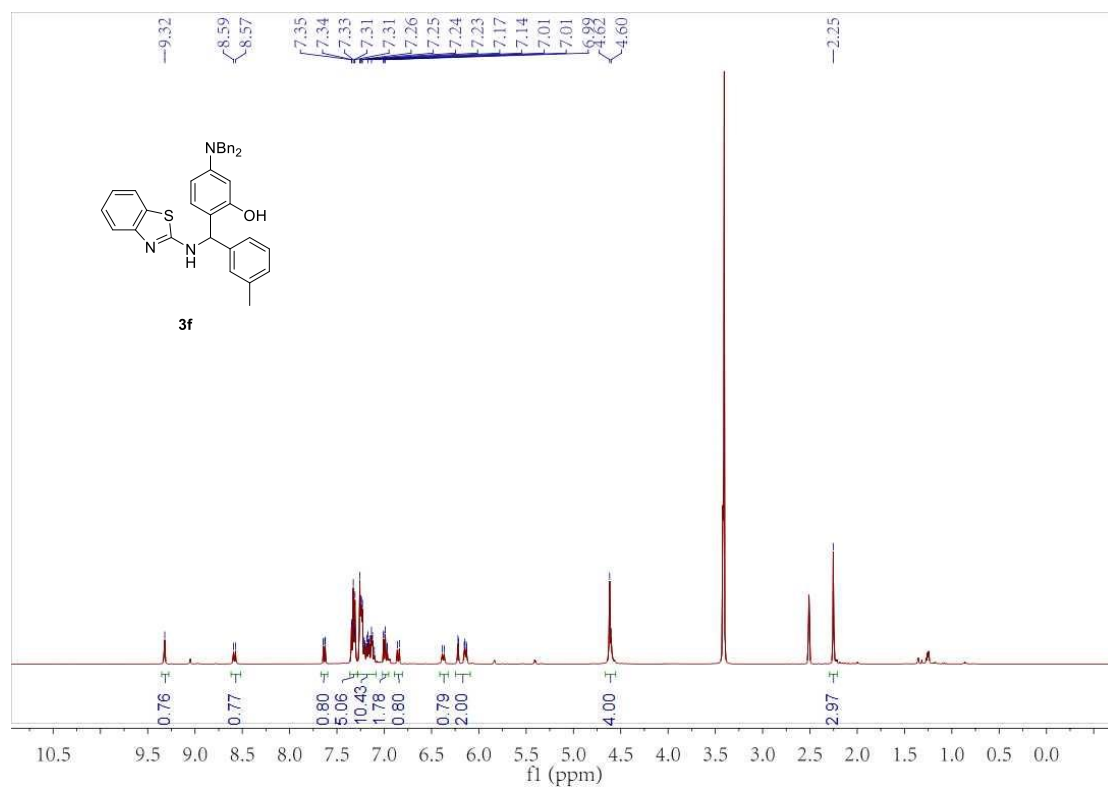

<sup>13</sup>C NMR spectrum of compound **3f** (DMSO, 100 MHz)

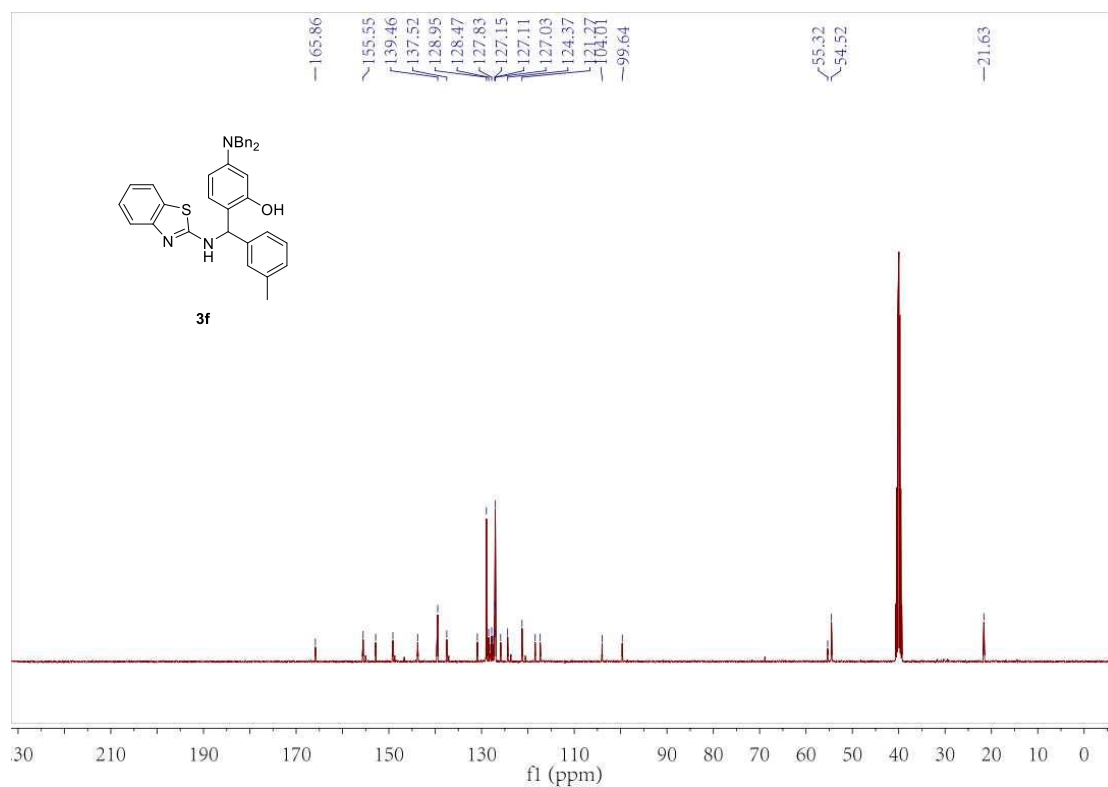



$^1\text{H}$  NMR spectrum of compound **3g** (DMSO, 400 MHz)

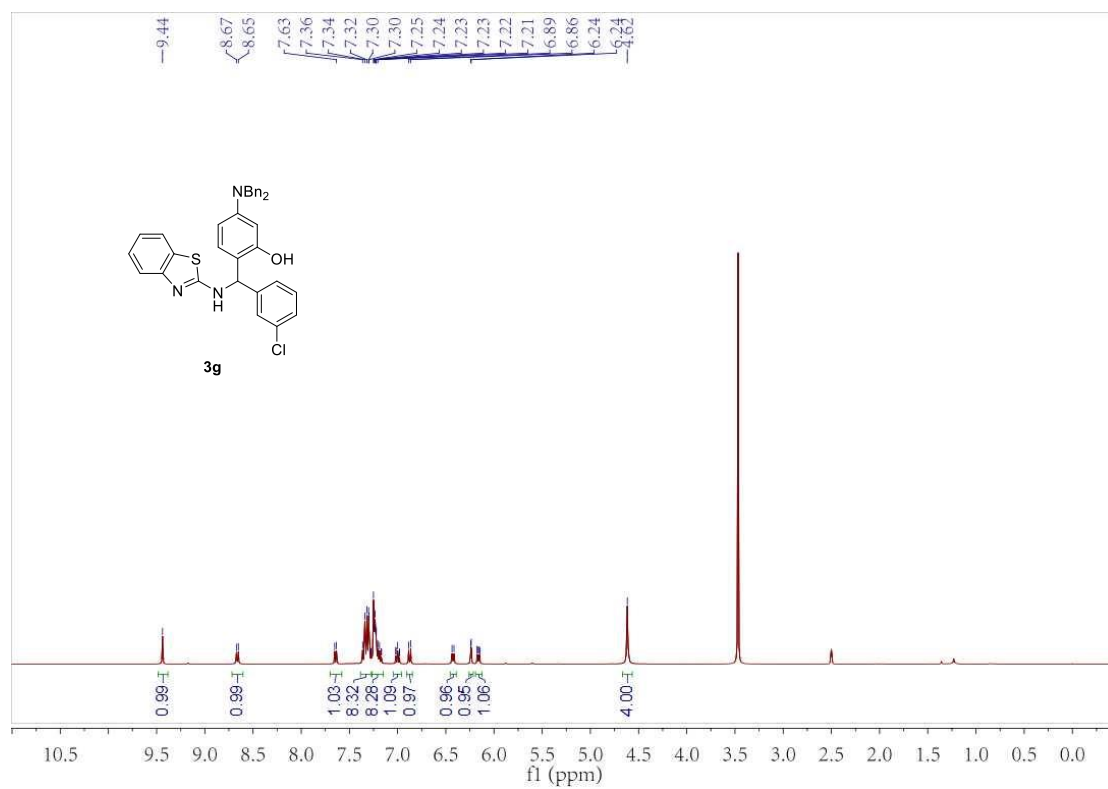

$^{13}\text{C}$  NMR spectrum of compound **3g** (DMSO, 100 MHz)

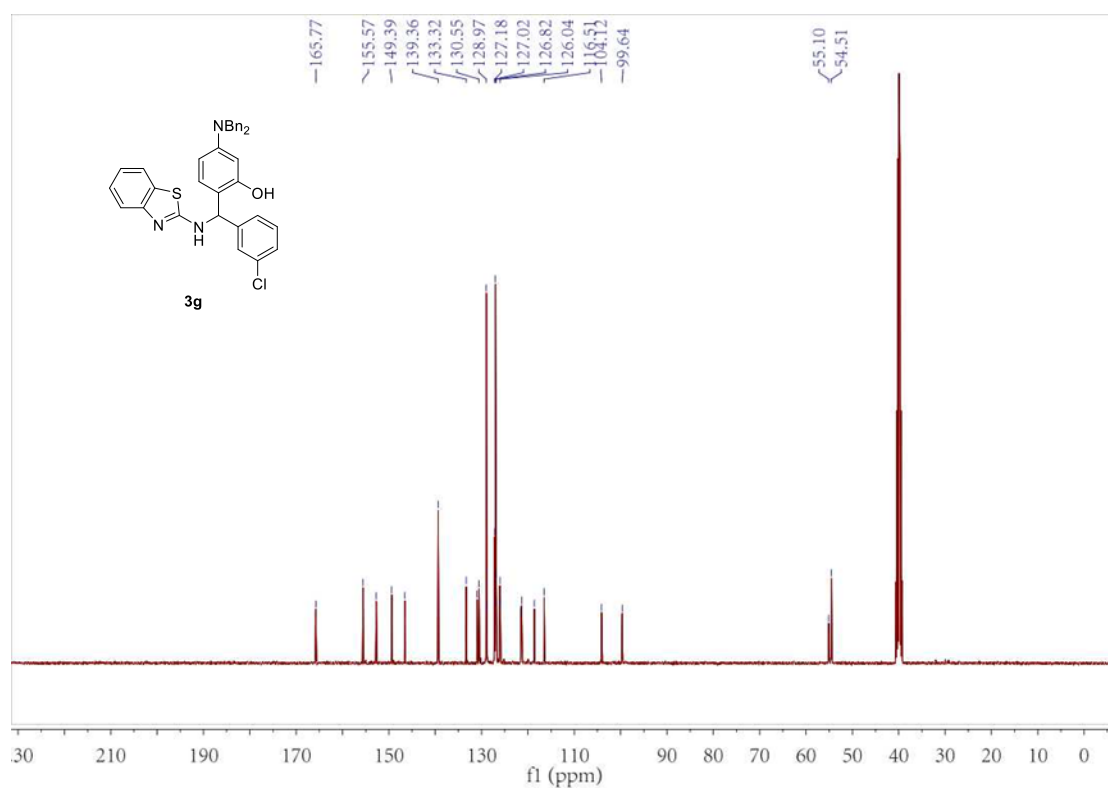

<sup>1</sup>H NMR spectrum of compound **3h** (DMSO, 400 MHz)

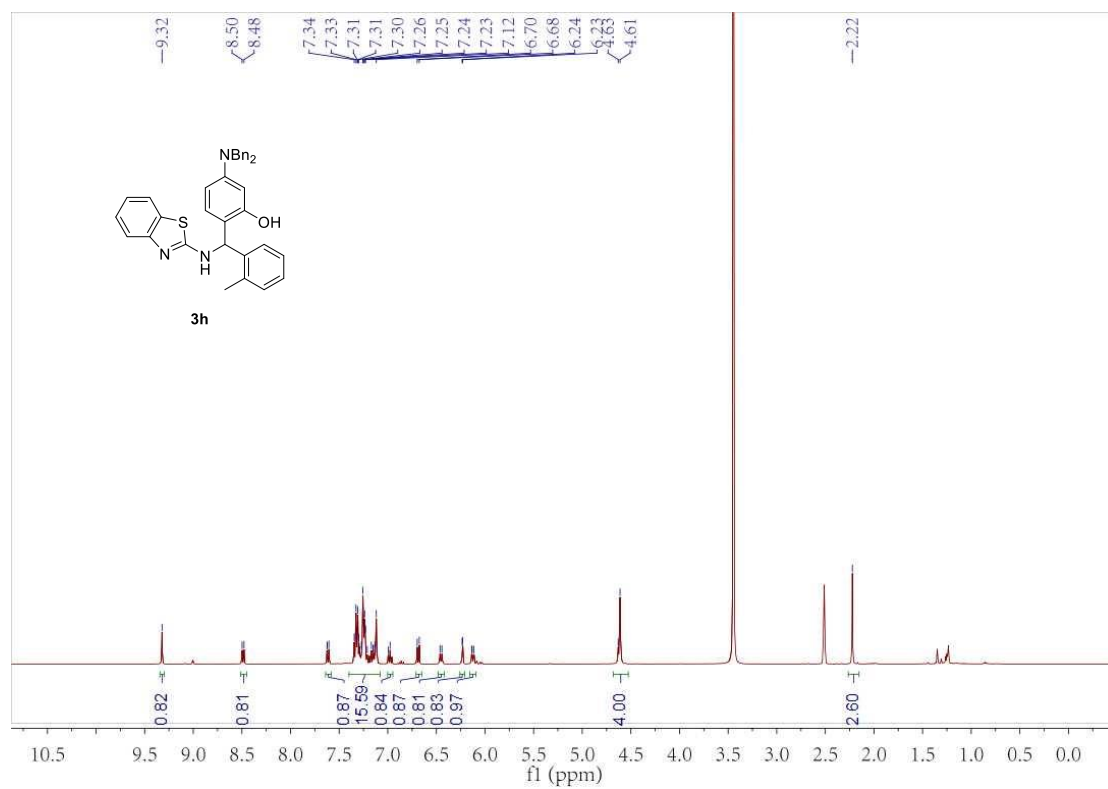

<sup>13</sup>C NMR spectrum of compound **3h** (DMSO, 100 MHz)

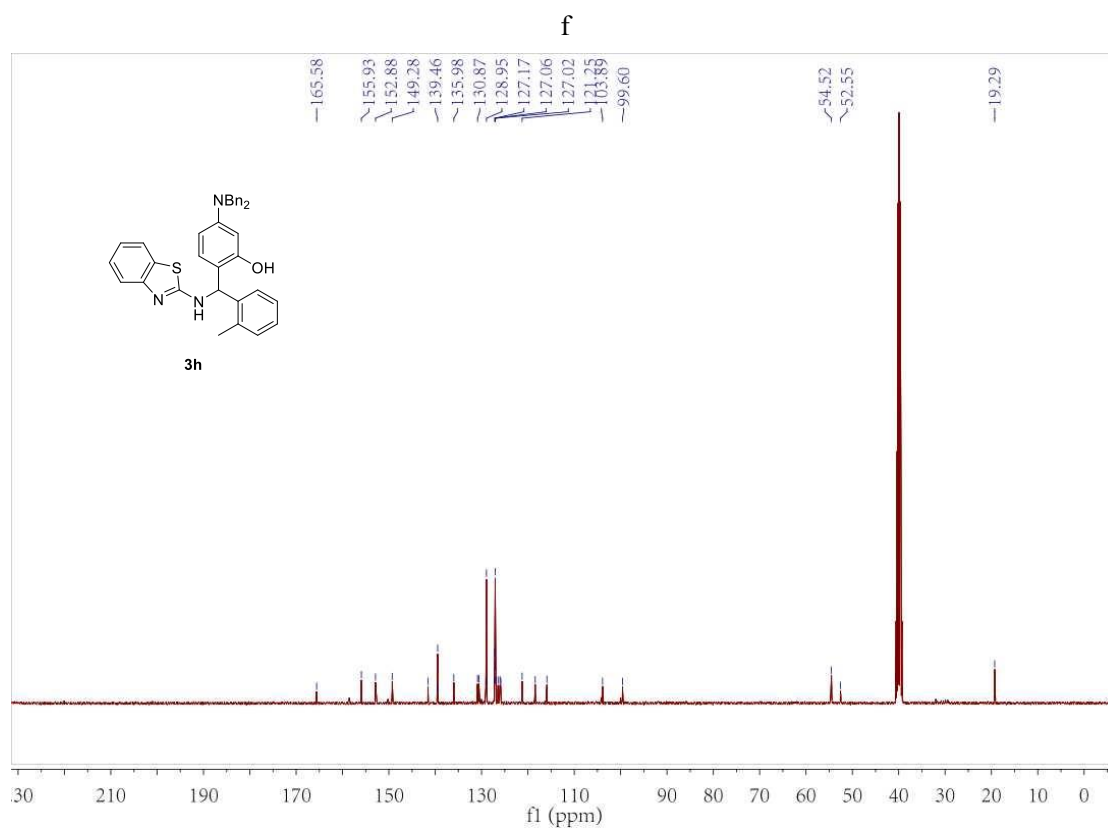



<sup>1</sup>H NMR spectrum of compound **3i** (DMSO, 400 MHz)

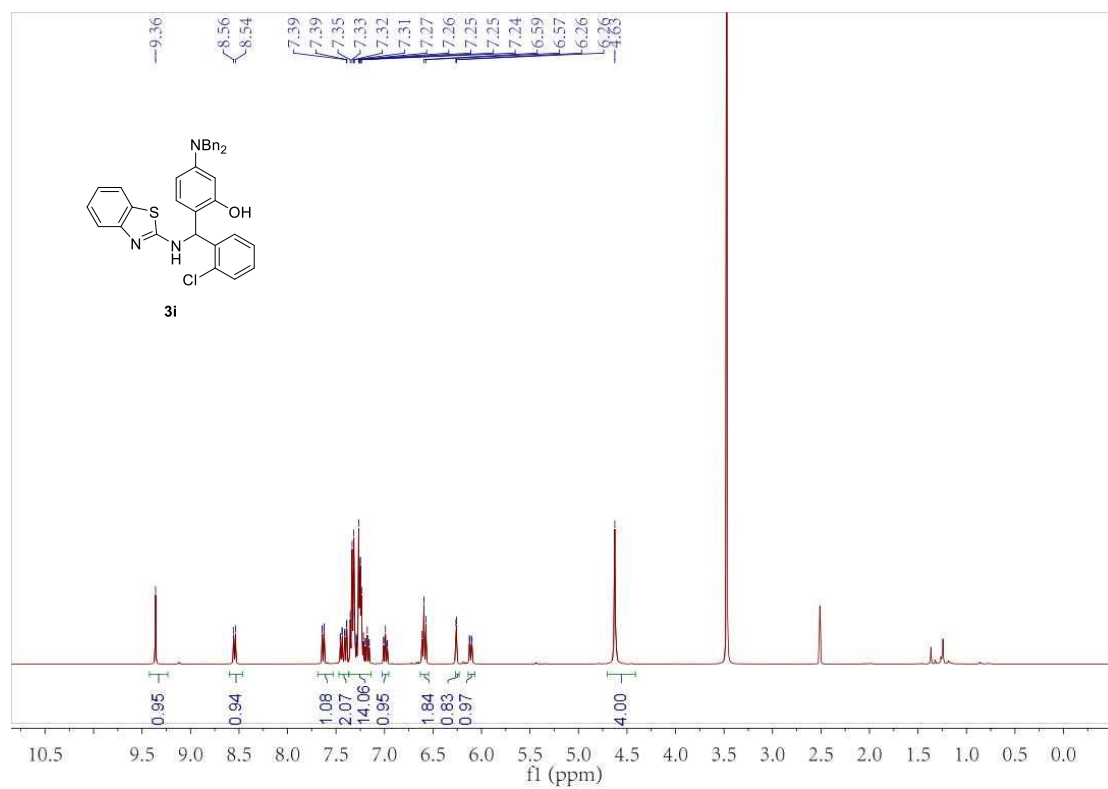

<sup>13</sup>C NMR spectrum of compound **3i** (DMSO, 100 MHz)

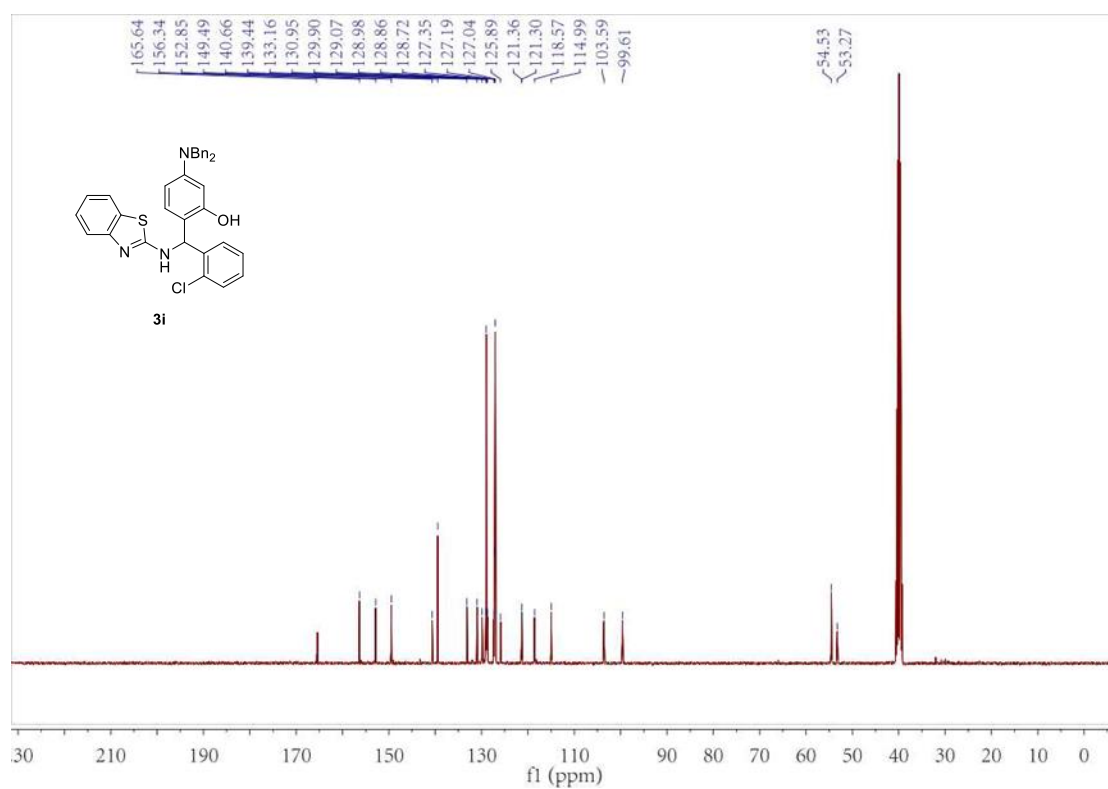

<sup>1</sup>H NMR spectrum of compound **3j** (DMSO, 400 MHz)

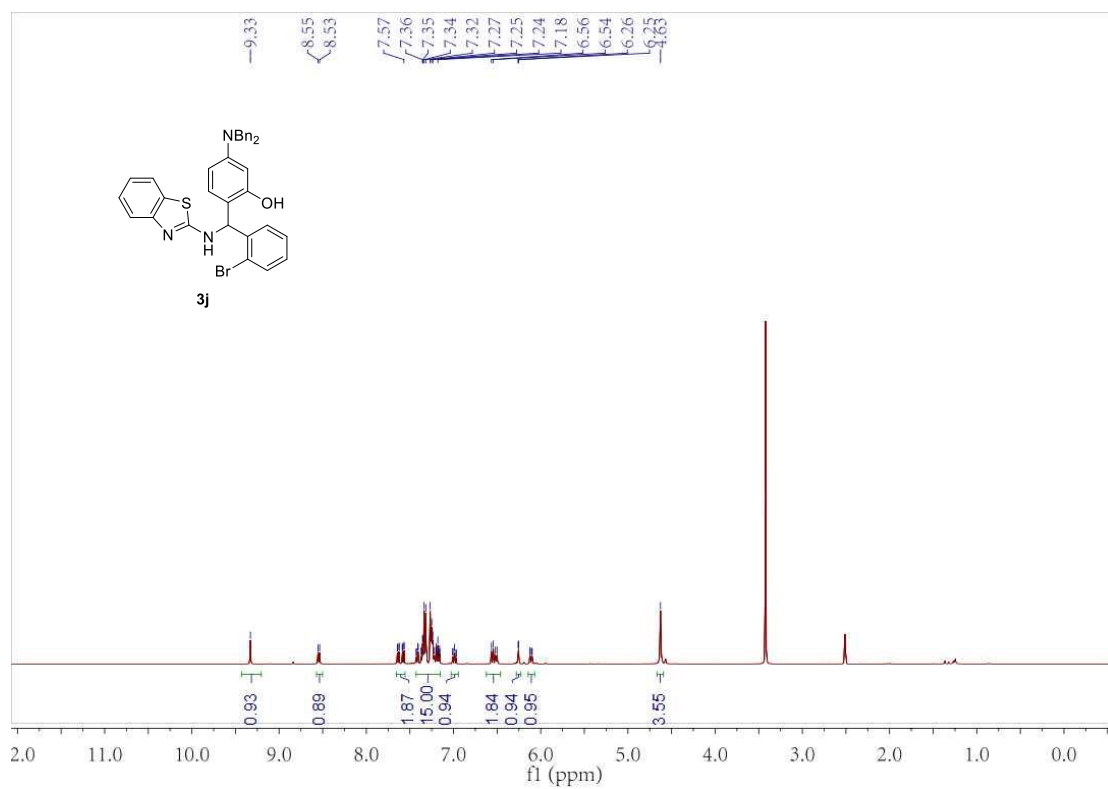

<sup>13</sup>C NMR spectrum of compound **3j** (DMSO, 100 MHz)

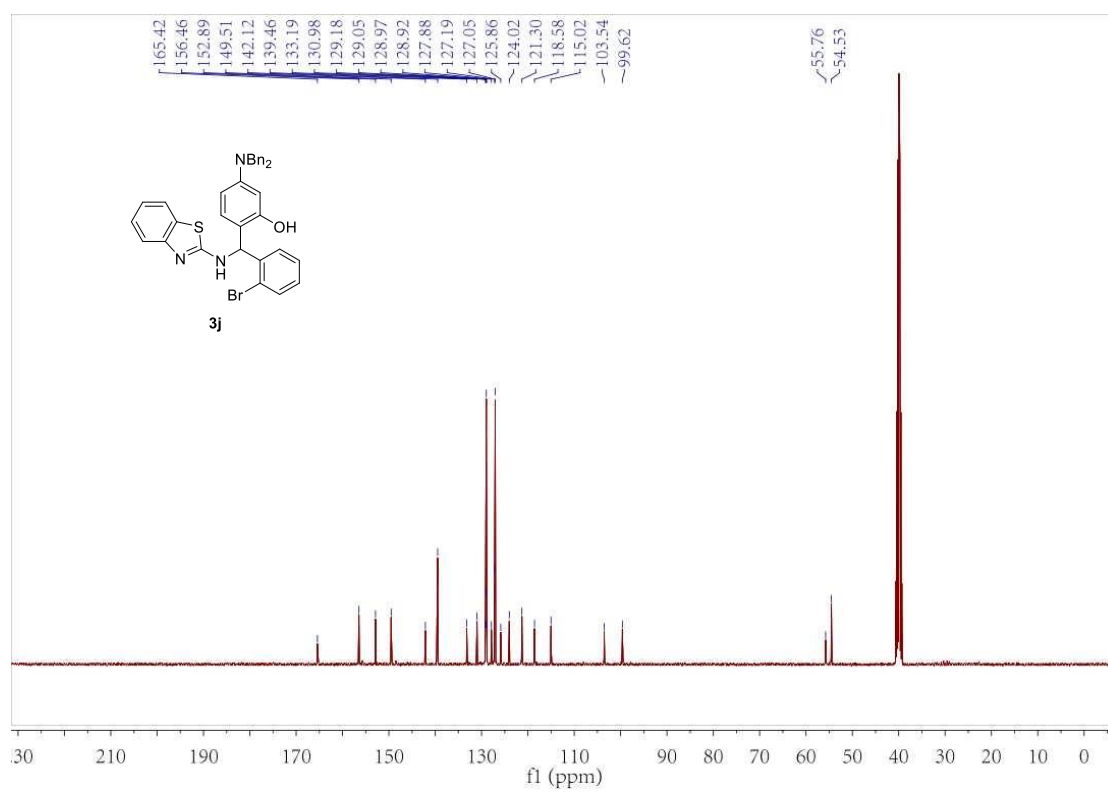

<sup>1</sup>H NMR spectrum of compound **3k** (DMSO, 400 MHz)

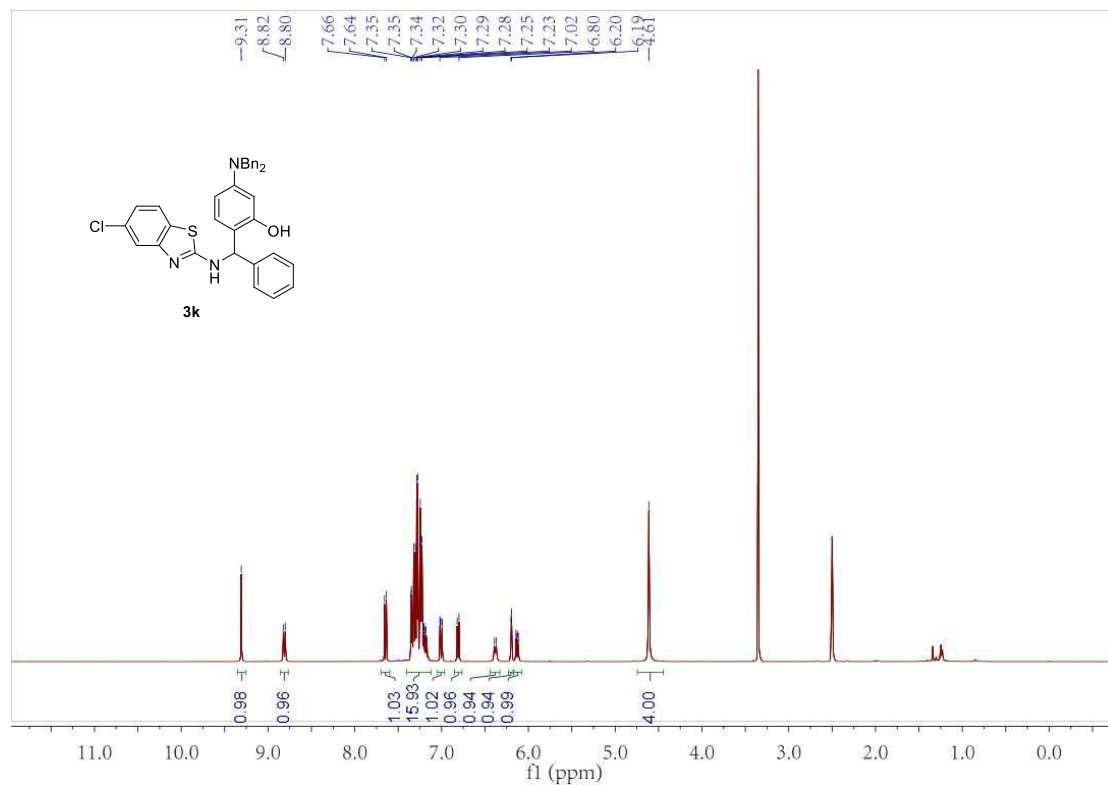

<sup>13</sup>C NMR spectrum of compound **3k** (DMSO, 100 MHz)

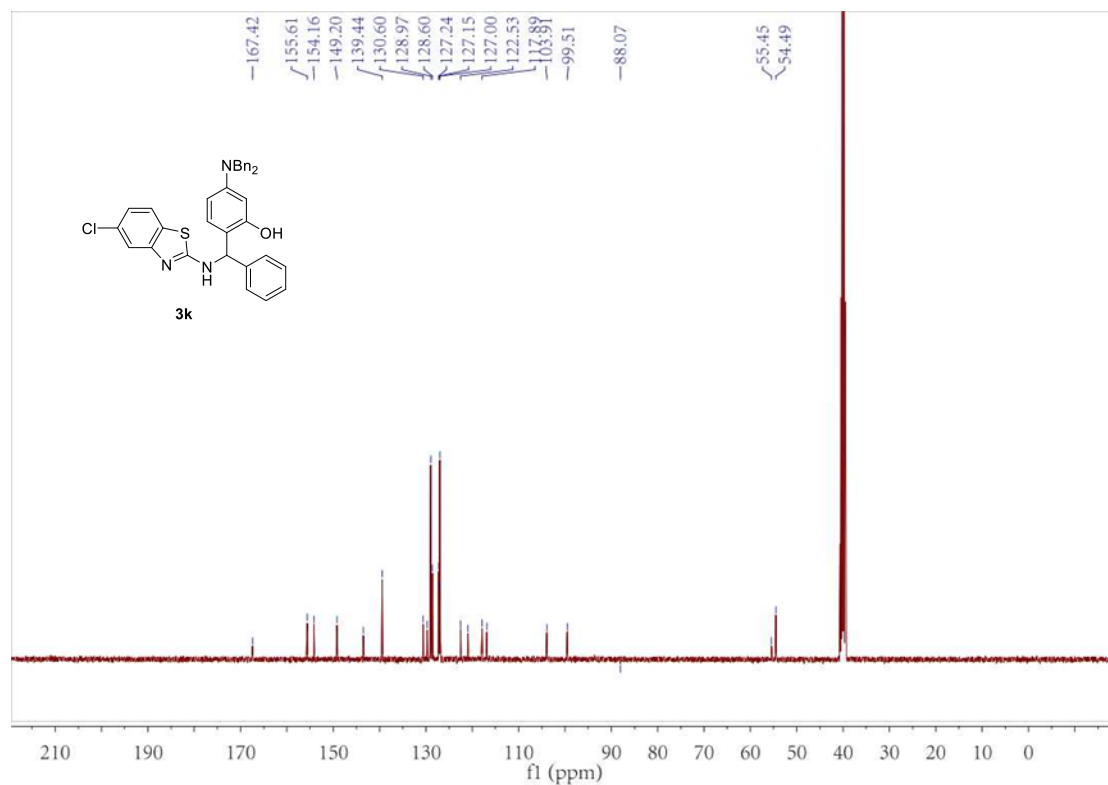

<sup>1</sup>H NMR spectrum of compound **31** (DMSO, 400 MHz)

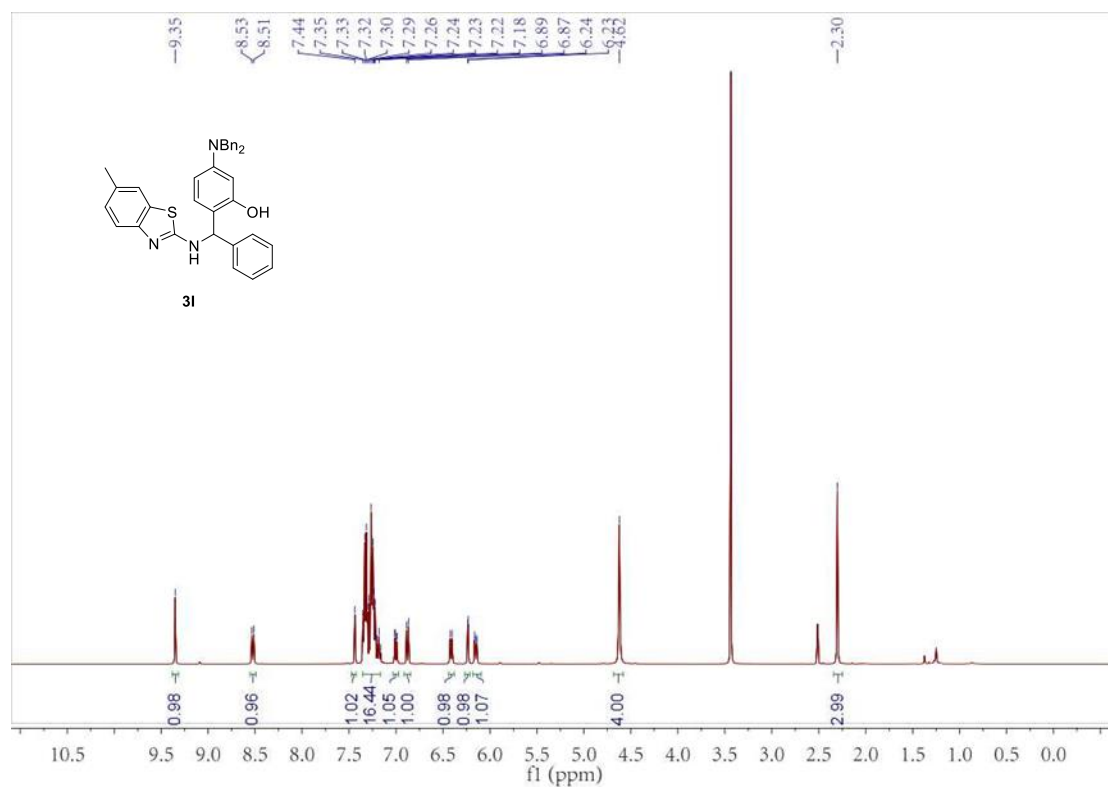

<sup>13</sup>C NMR spectrum of compound **31** (DMSO, 100 MHz)

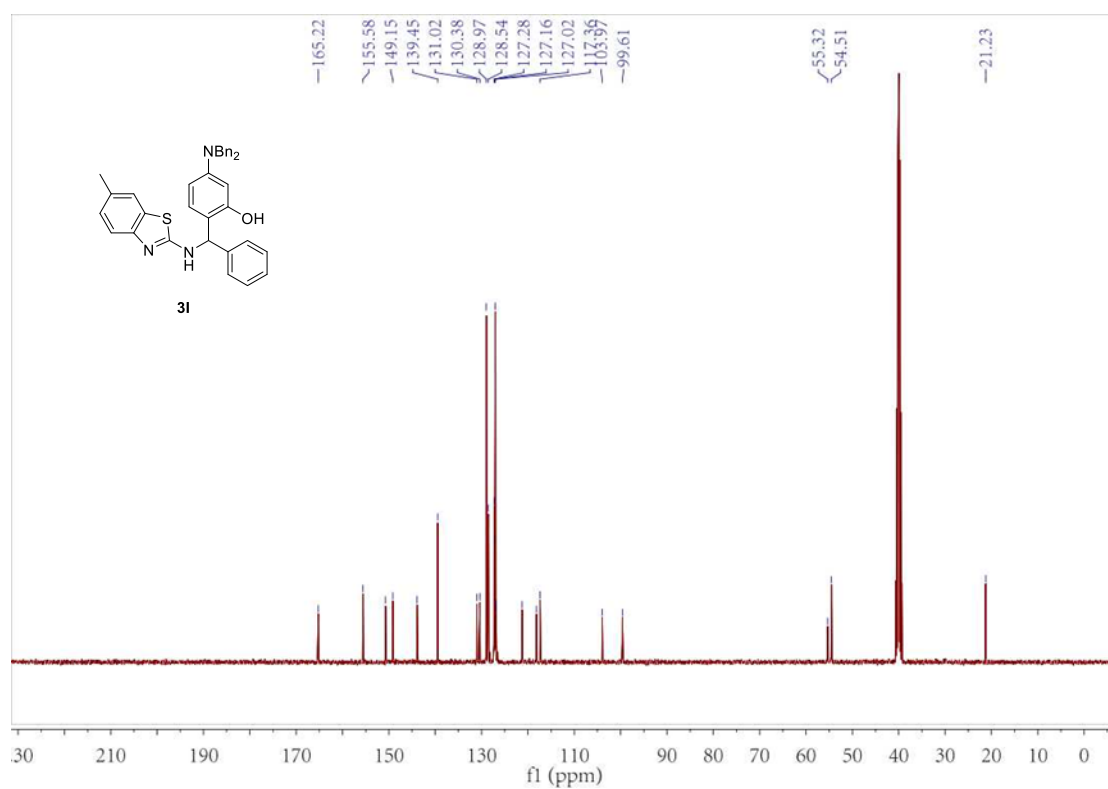

<sup>1</sup>H NMR spectrum of compound **3m** (DMSO, 400 MHz)

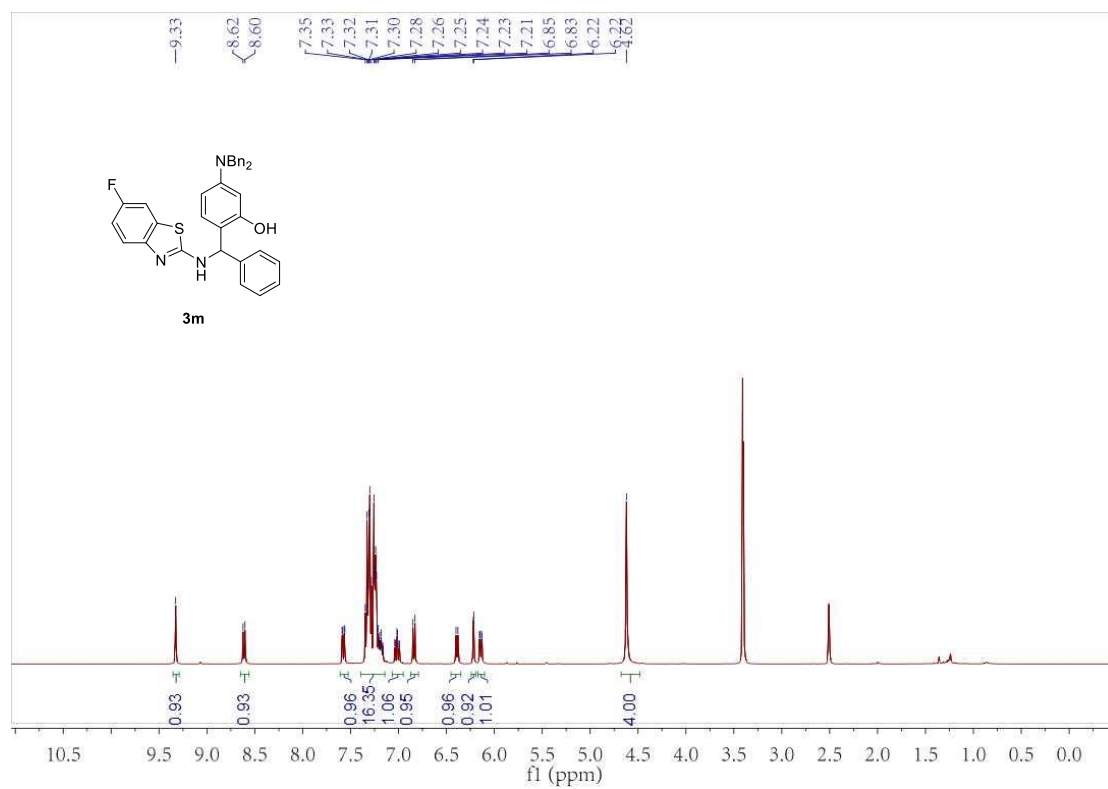

<sup>13</sup>C NMR spectrum of compound **3m** (DMSO, 100 MHz)

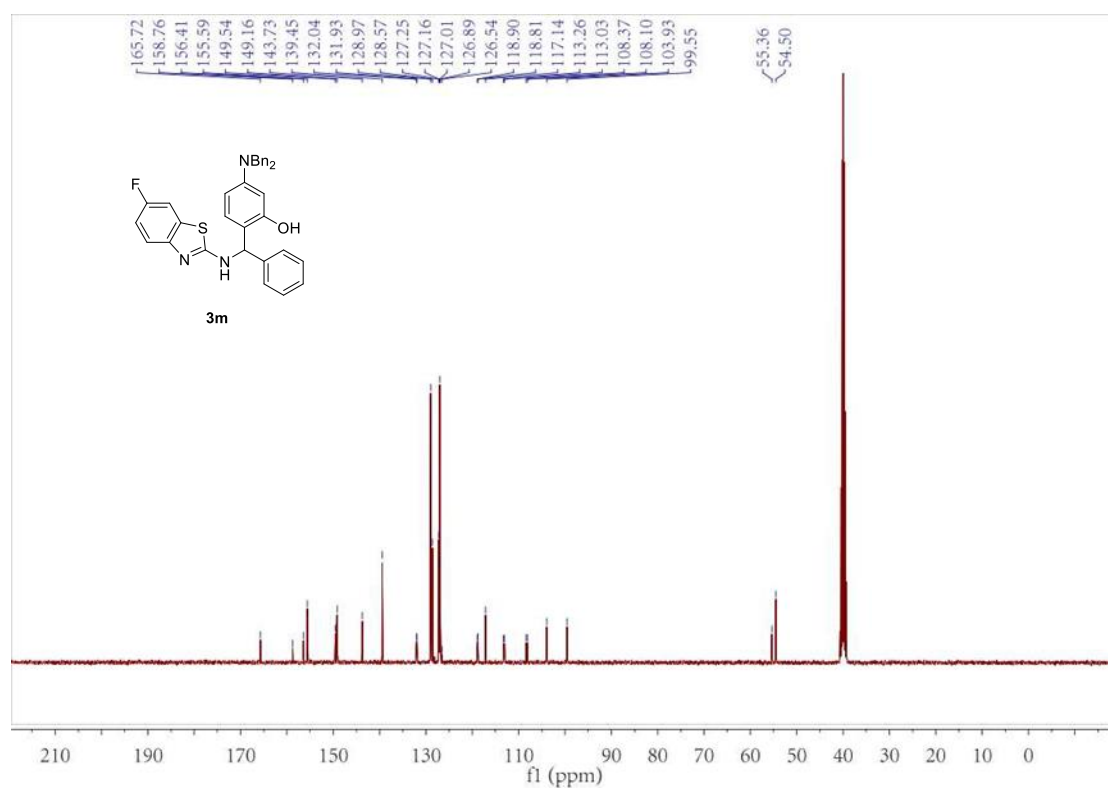



$^{19}\text{F}$  NMR spectrum of compound **3m** (DMSO, 376 MHz)

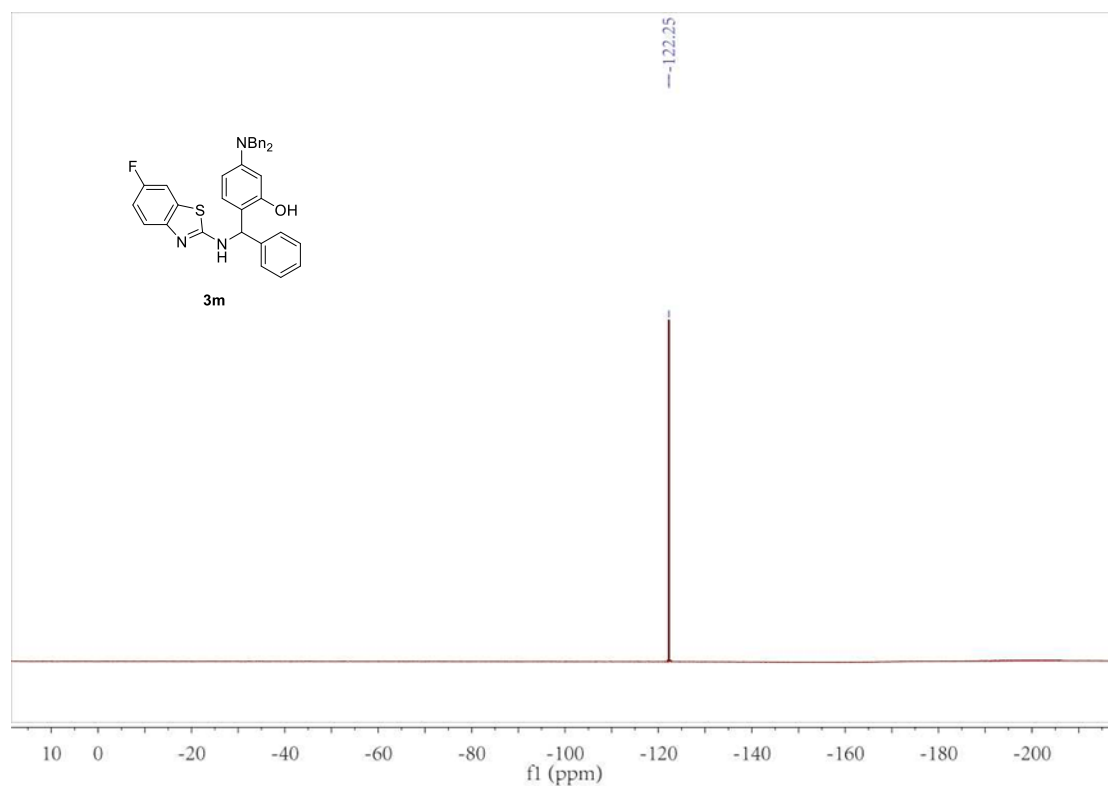

<sup>1</sup>H NMR spectrum of compound **3n** (DMSO, 400 MHz)

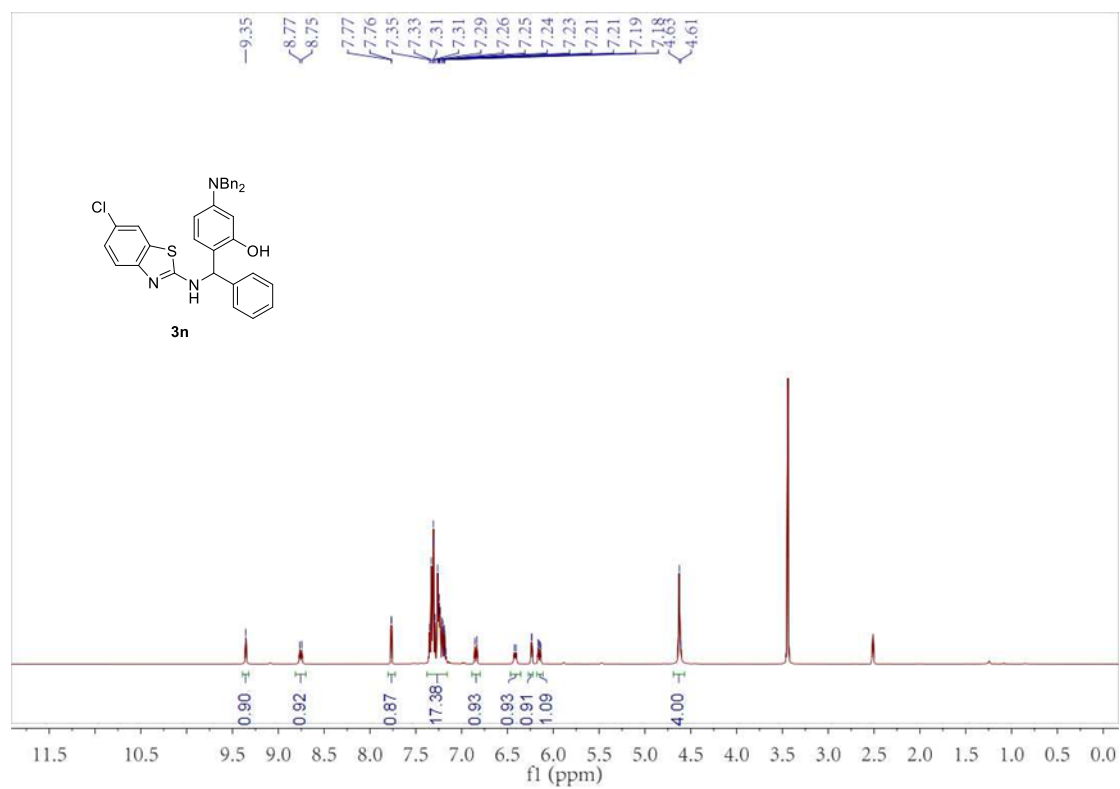

<sup>13</sup>C NMR spectrum of compound **3n** (DMSO, 100 MHz)

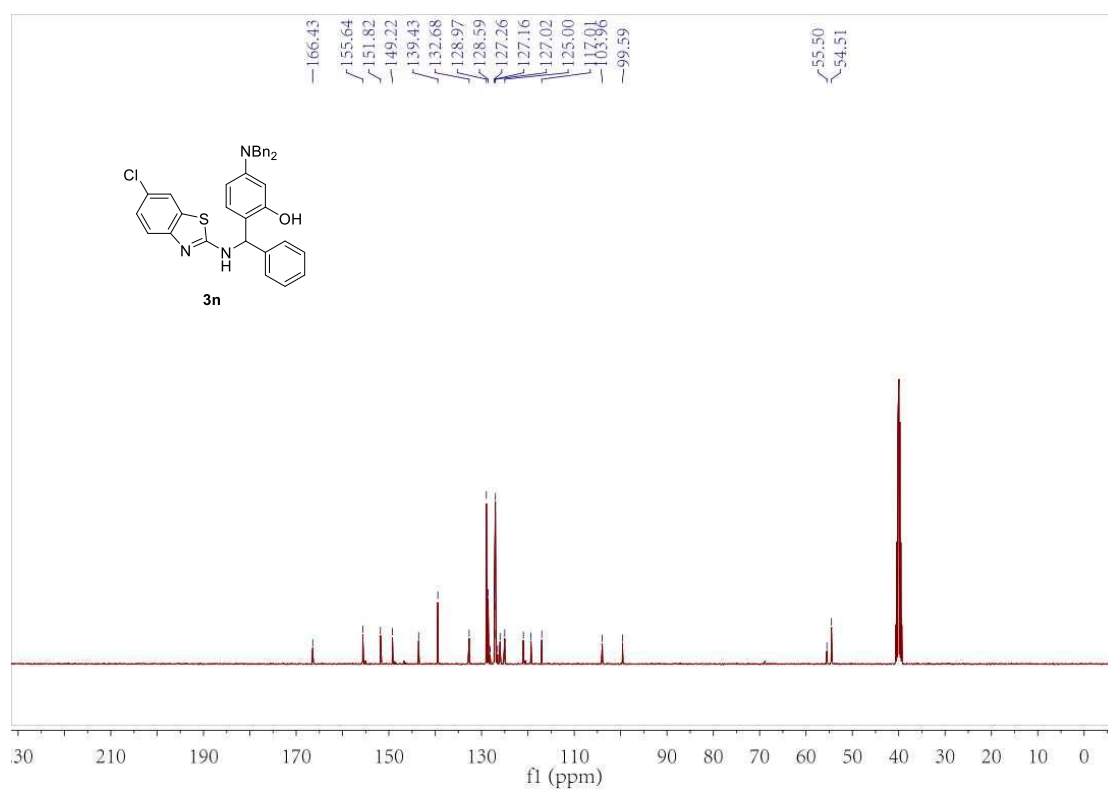

<sup>1</sup>H NMR spectrum of compound **3o** (DMSO, 400 MHz)

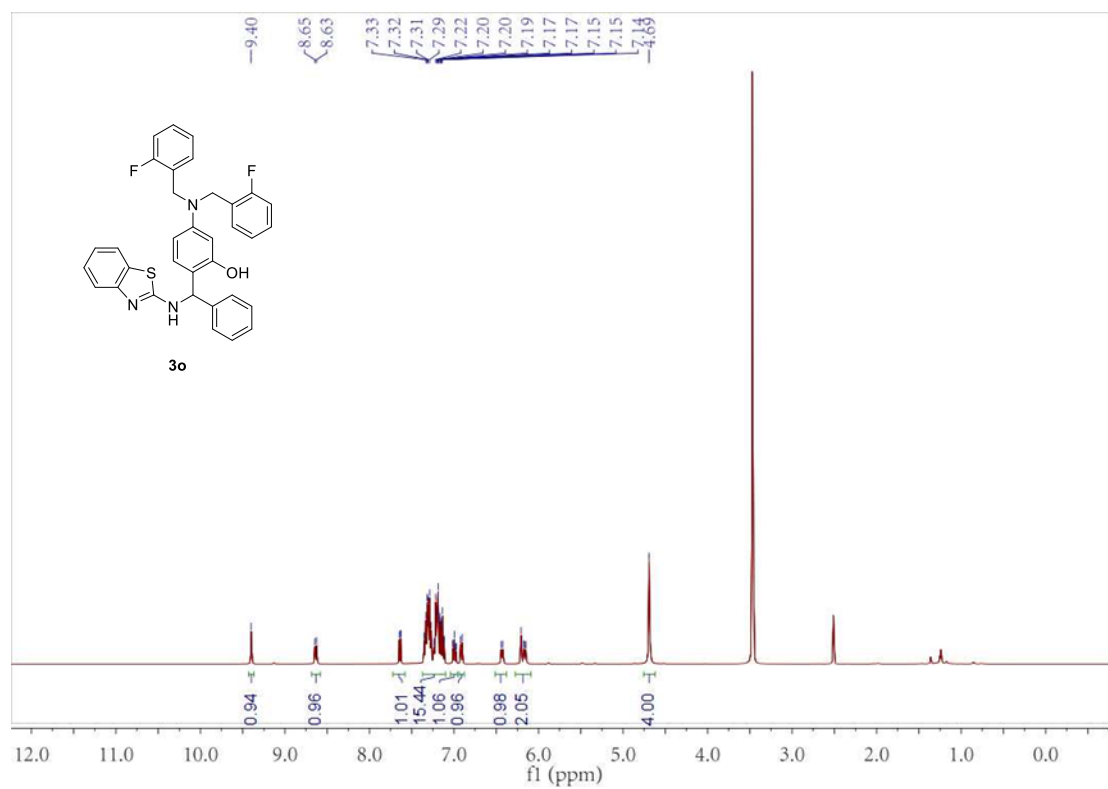

<sup>13</sup>C NMR spectrum of compound **3o** (DMSO, 100 MHz)

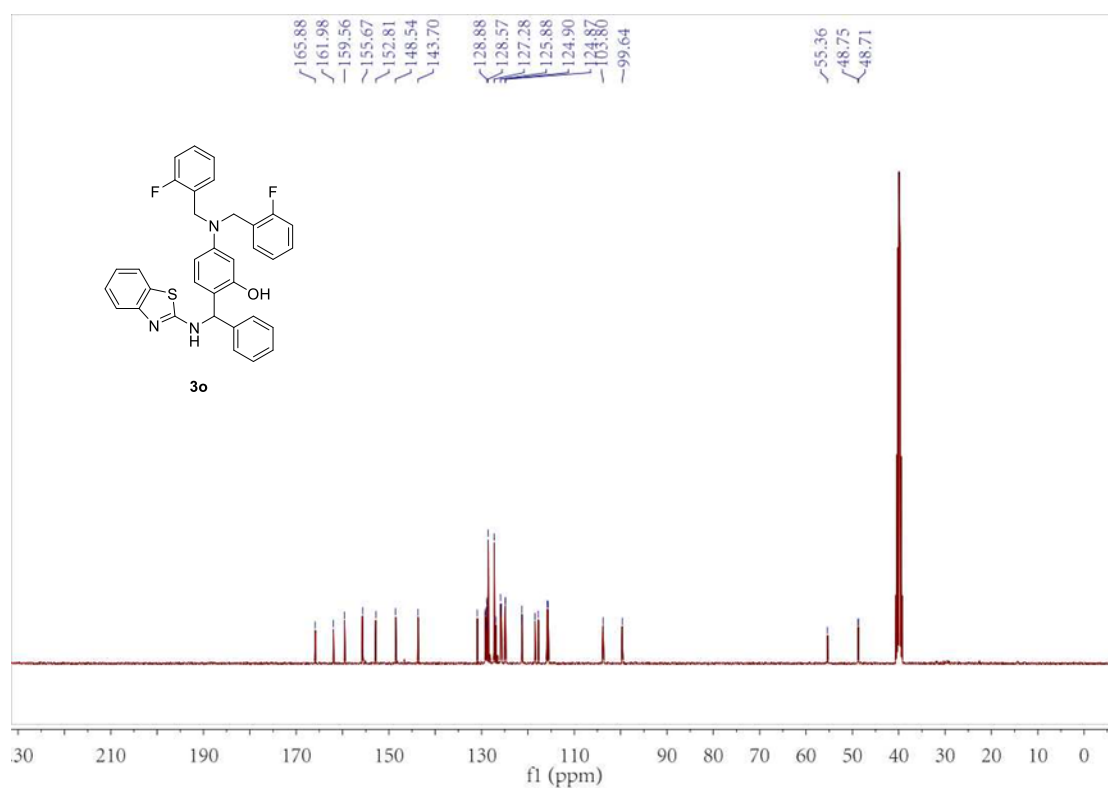

$^{19}\text{F}$  NMR spectrum of compound **3o** (DMSO, 376 MHz)

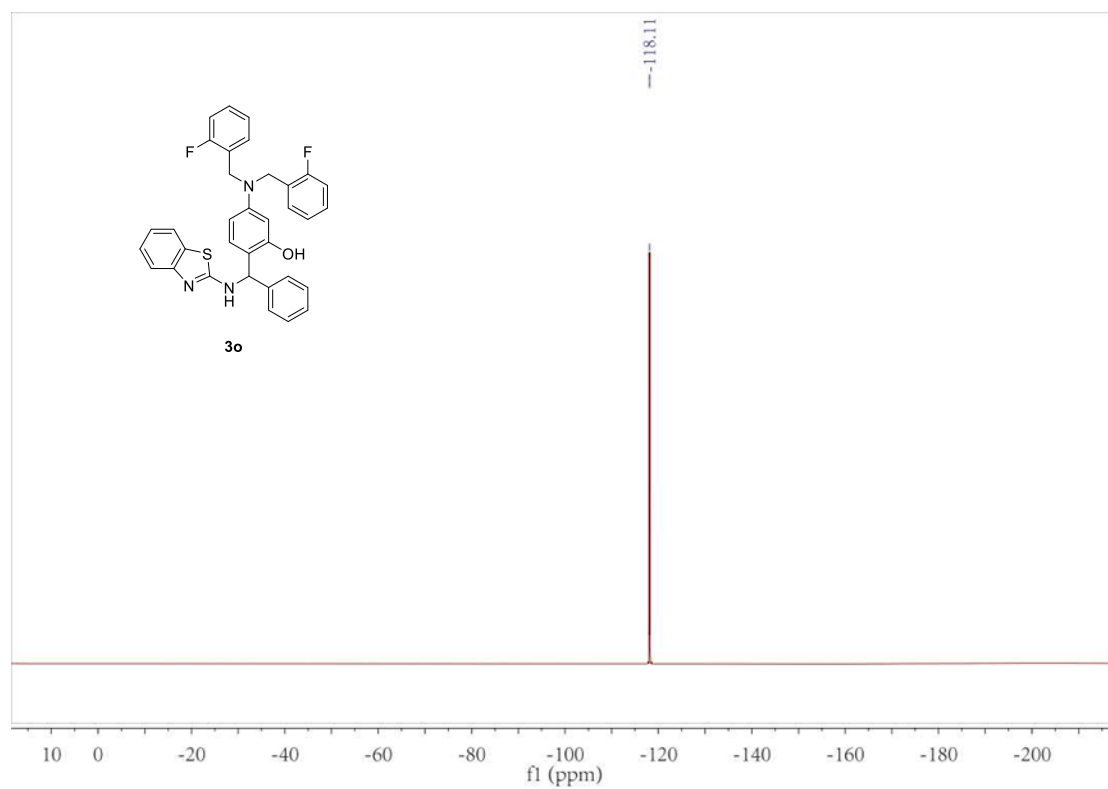

<sup>1</sup>H NMR spectrum of compound **3p** (DMSO, 400 MHz)

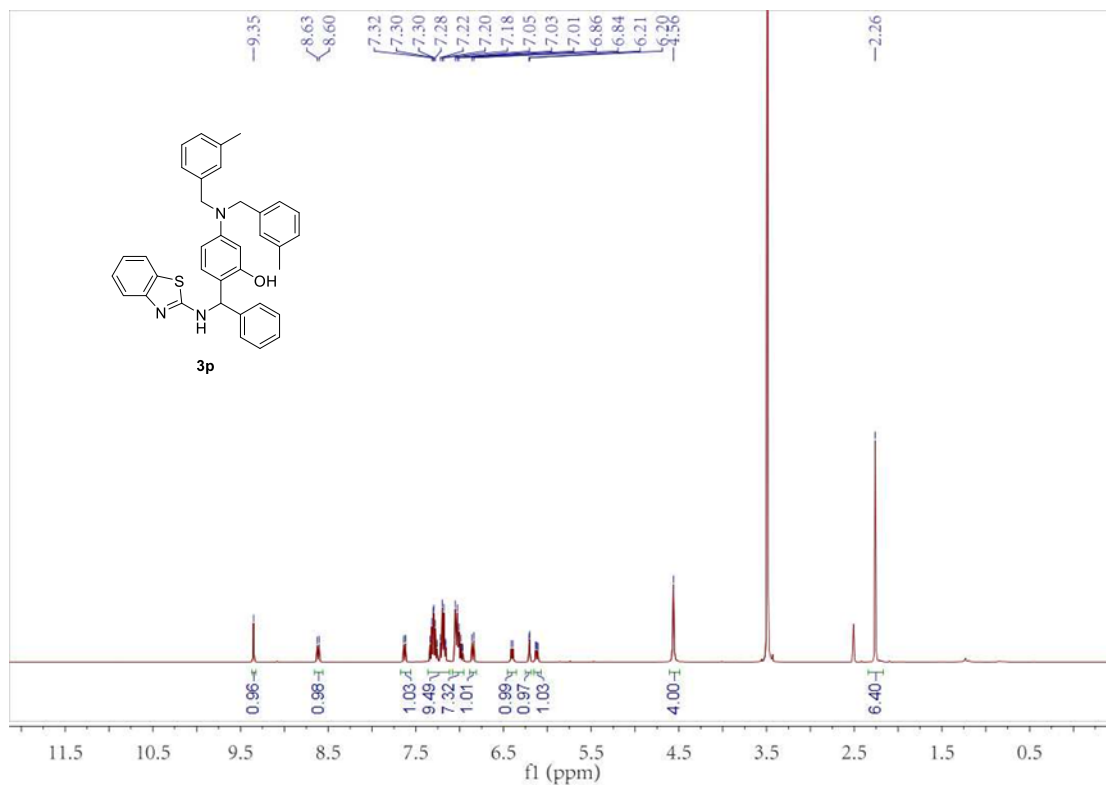

<sup>13</sup>C NMR spectrum of compound **3p** (DMSO, 100 MHz)

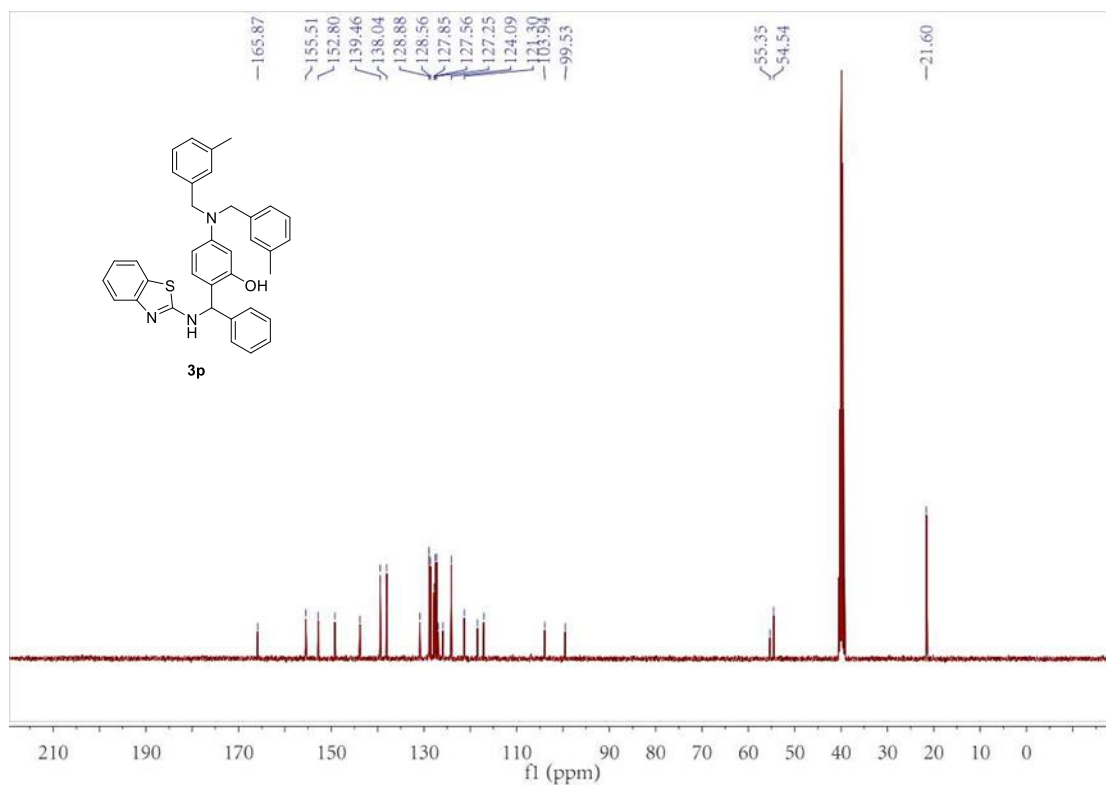

<sup>1</sup>H NMR spectrum of compound **3q** (DMSO, 400 MHz)

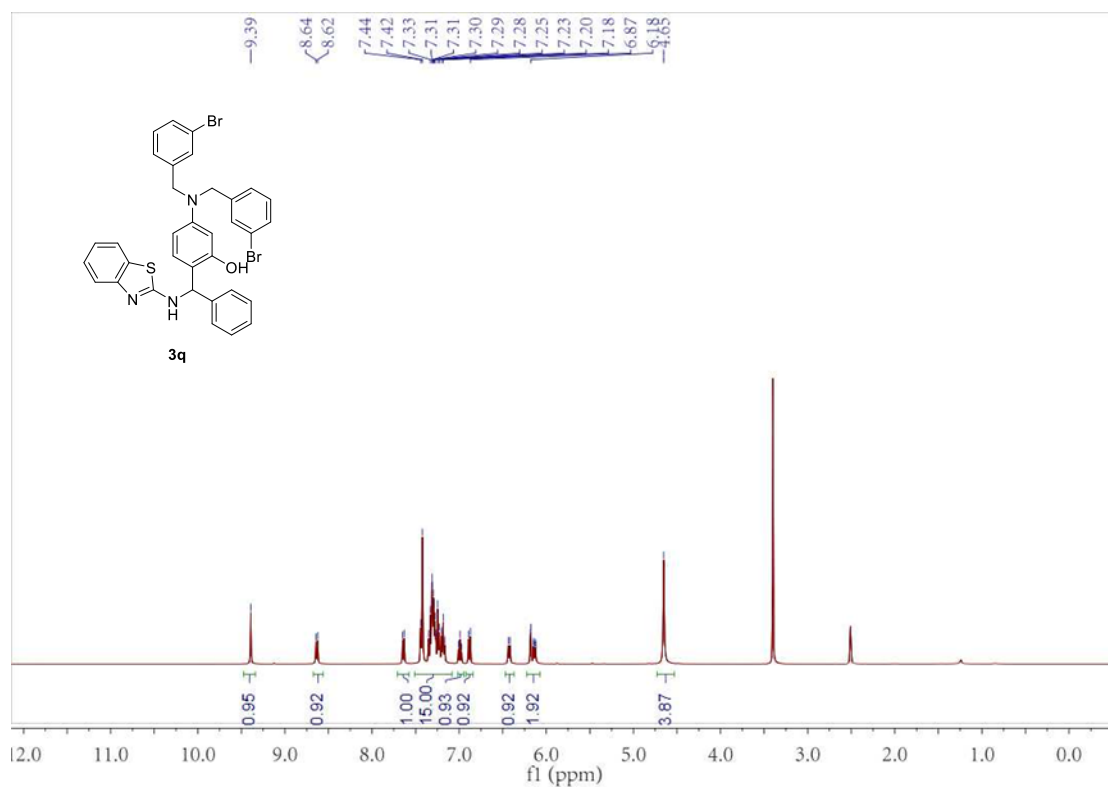

<sup>13</sup>C NMR spectrum of compound **3q** (DMSO, 100 MHz)

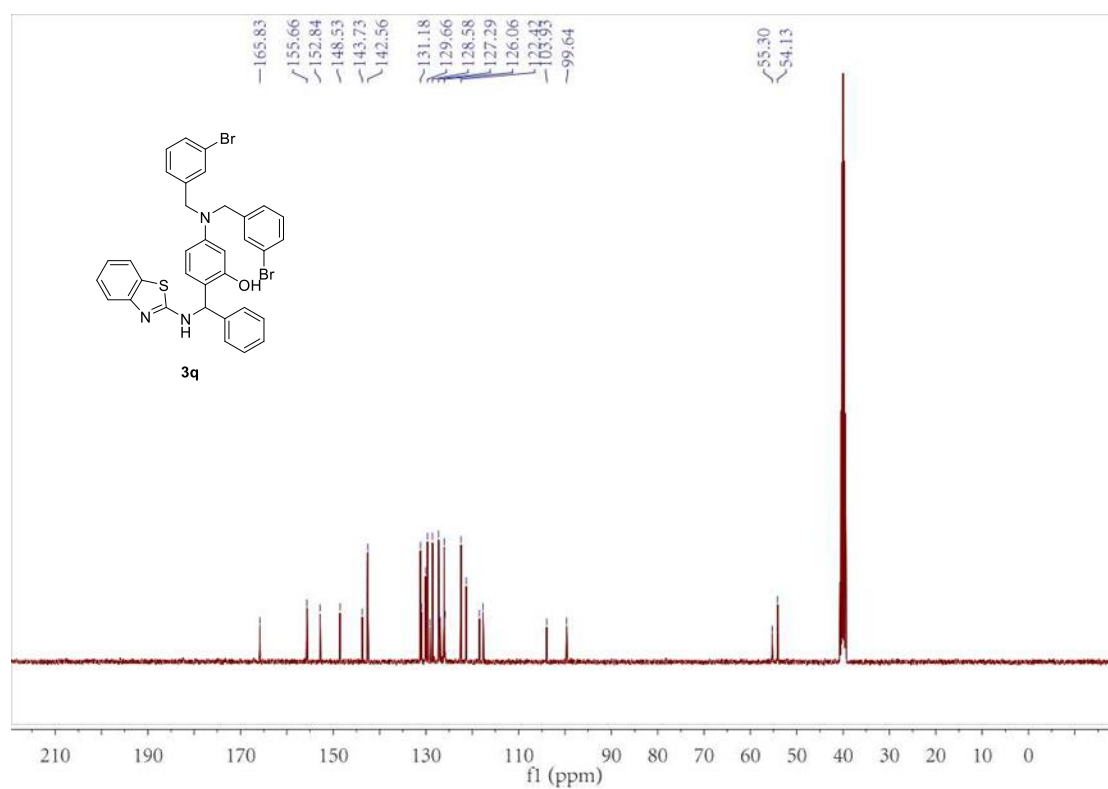

<sup>1</sup>H NMR spectrum of compound **3r** (DMSO, 400 MHz)

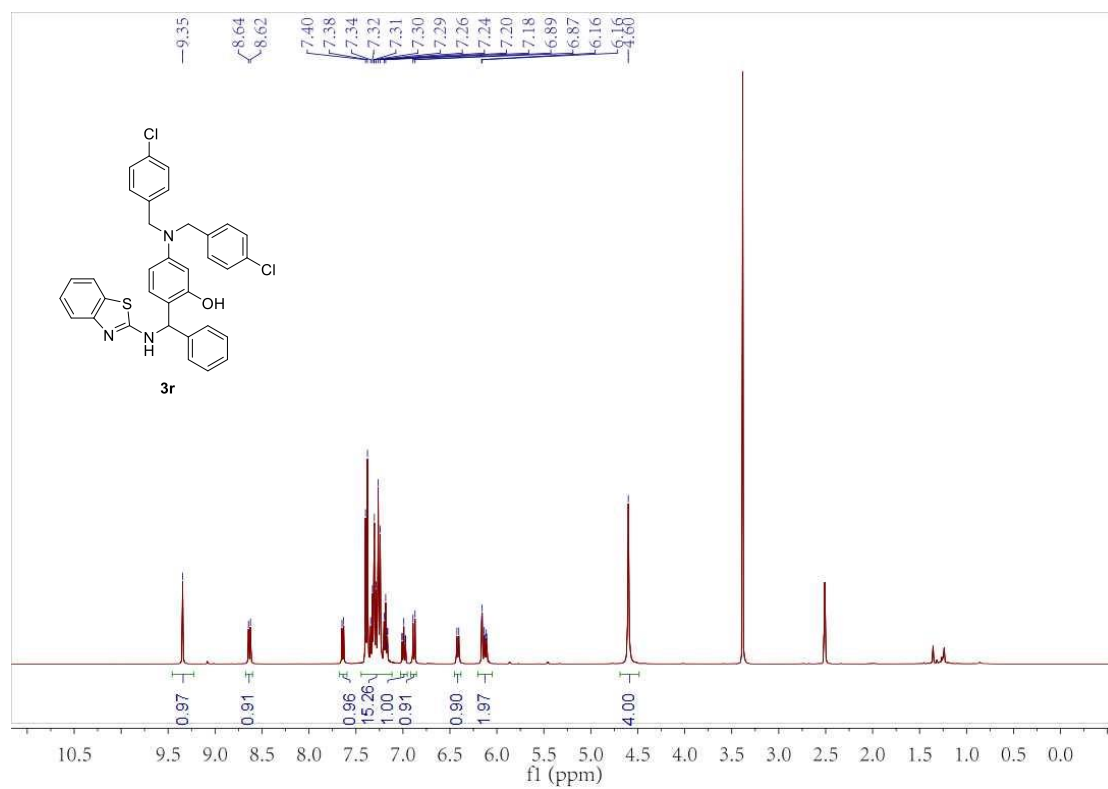

<sup>13</sup>C NMR spectrum of compound **3r** (DMSO, 100 MHz)

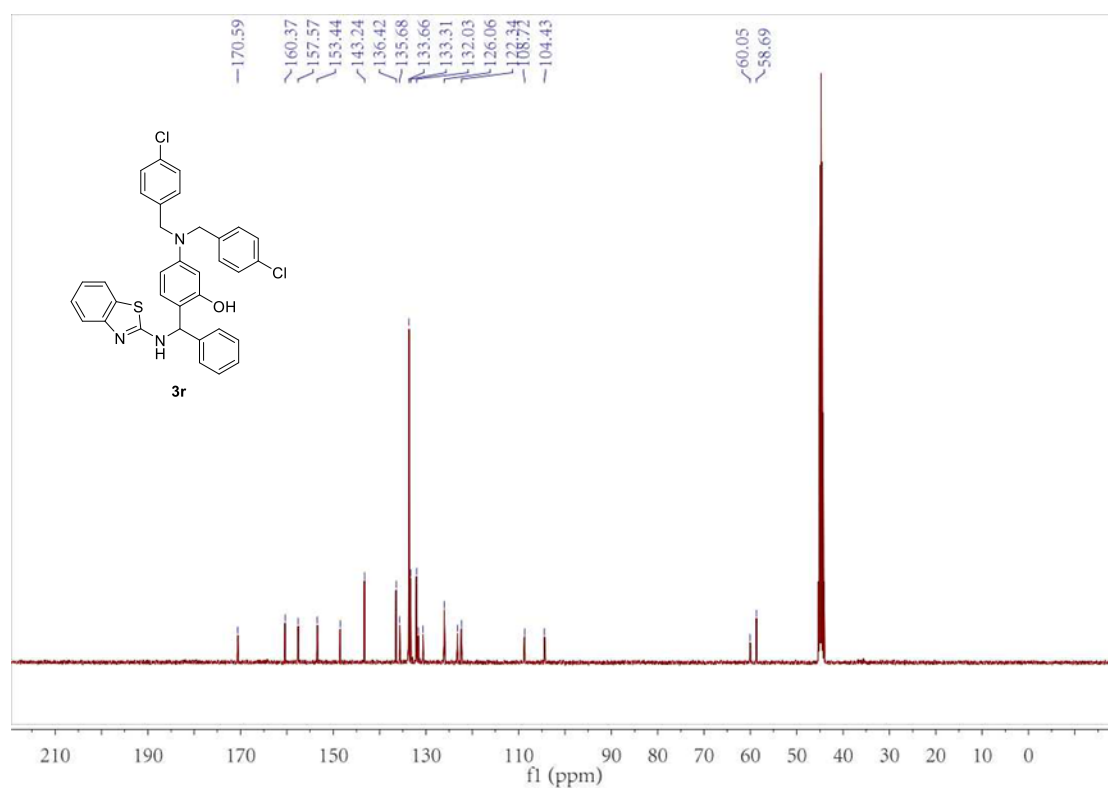

<sup>1</sup>H NMR spectrum of compound **3s** (DMSO, 400 MHz)

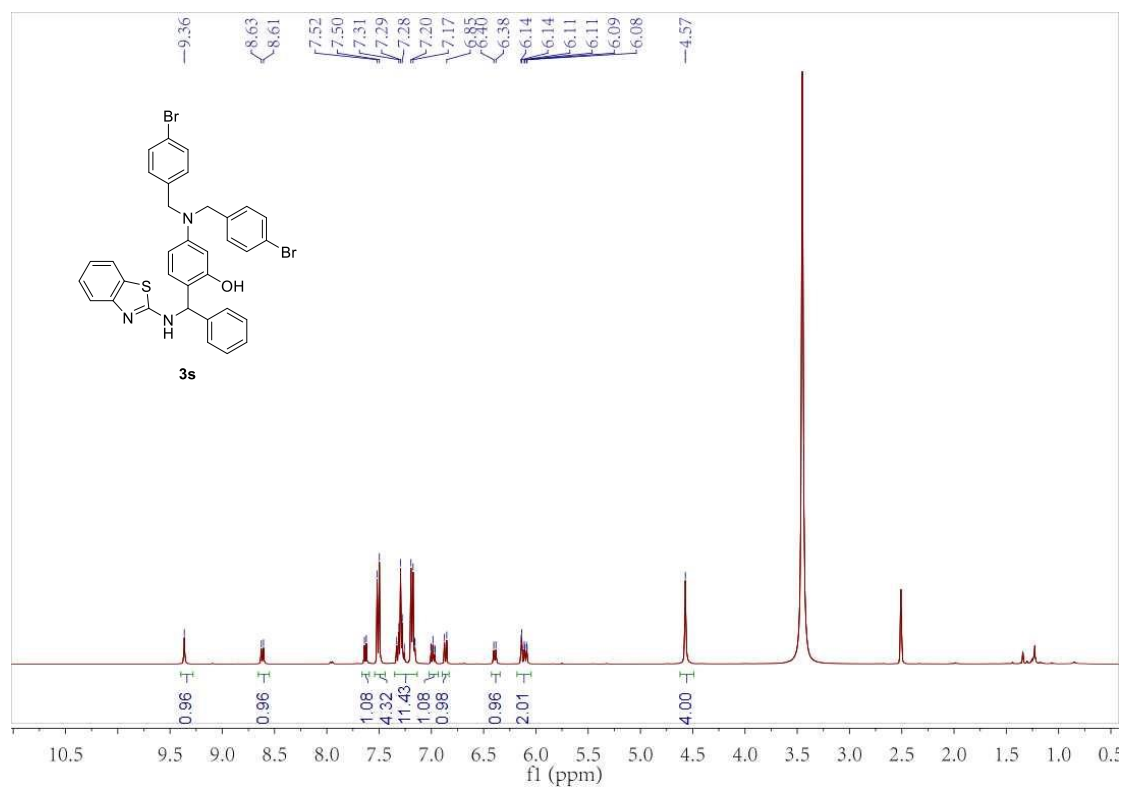

<sup>13</sup>C NMR spectrum of compound **3s** (DMSO, 100 MHz)

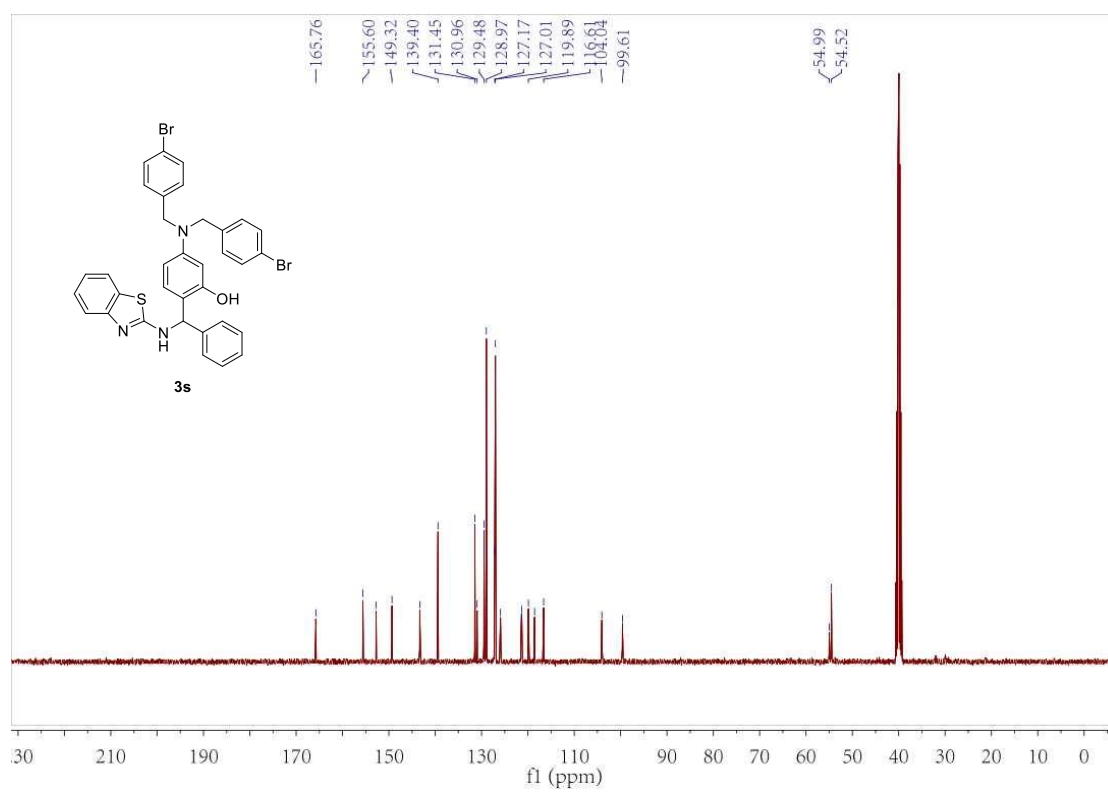



<sup>1</sup>H NMR spectrum of compound **3t** (DMSO, 400 MHz)

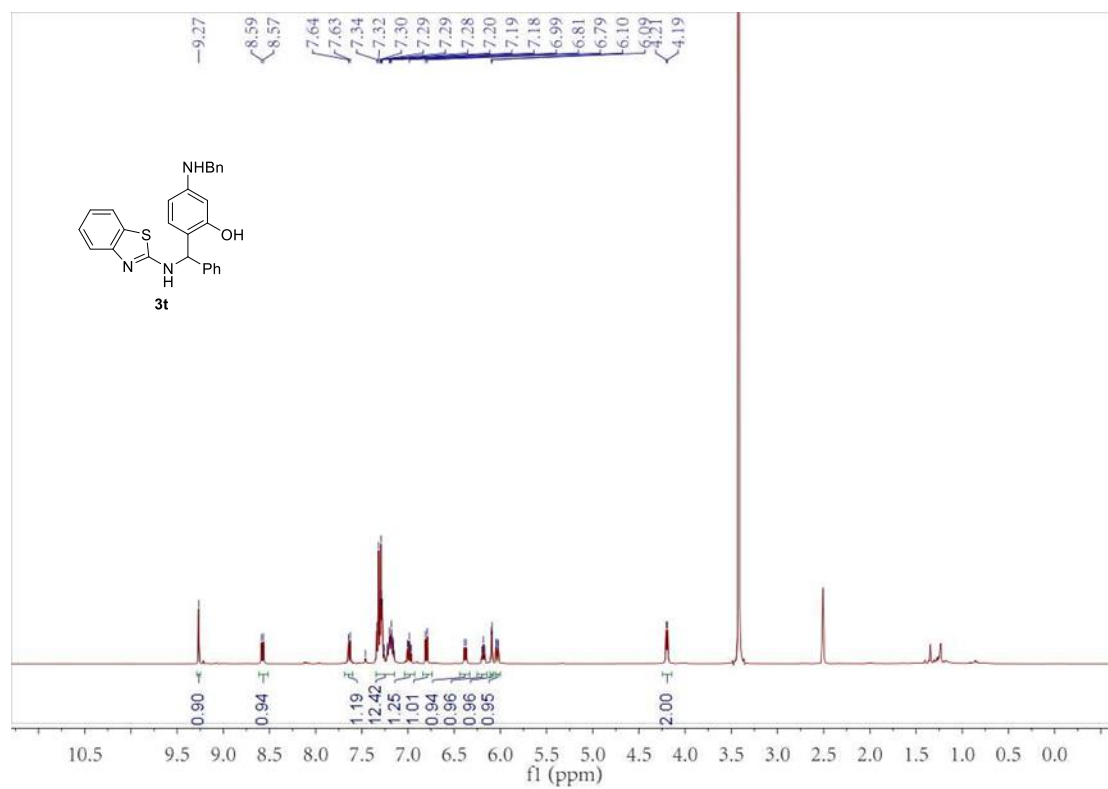

<sup>13</sup>C NMR spectrum of compound **3t** (DMSO, 100 MHz)

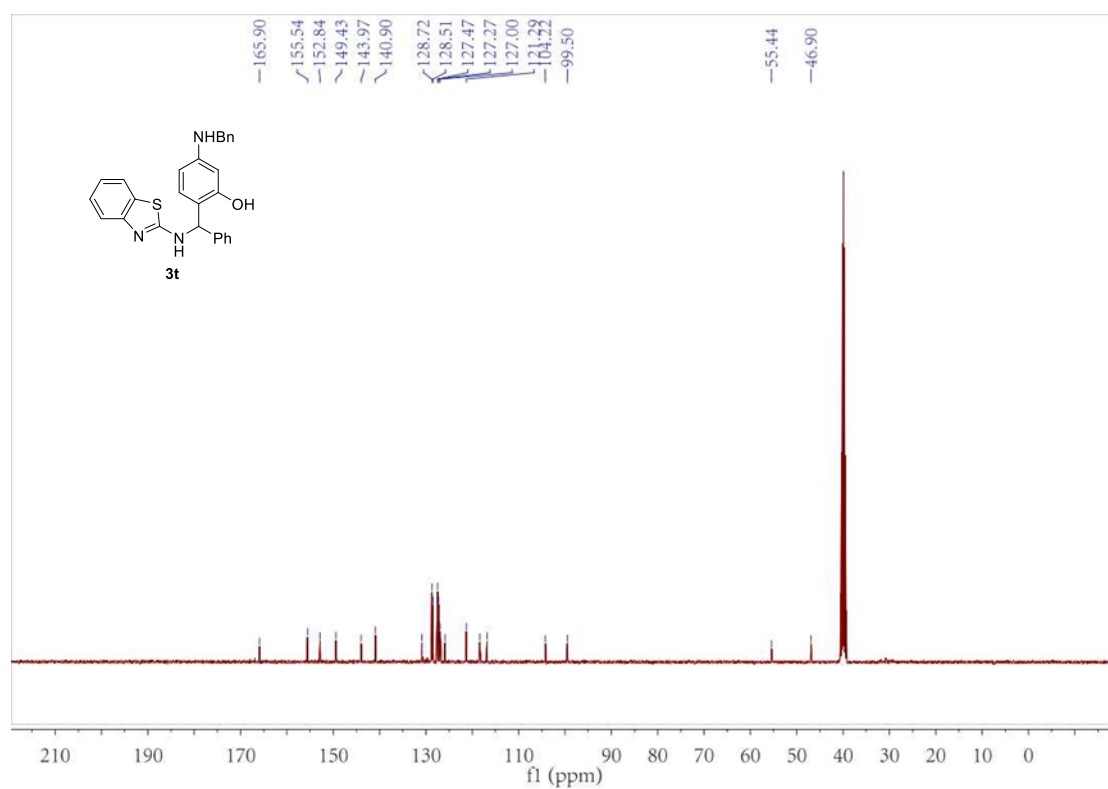

<sup>1</sup>H NMR spectrum of compound **3u** (DMSO, 400 MHz)

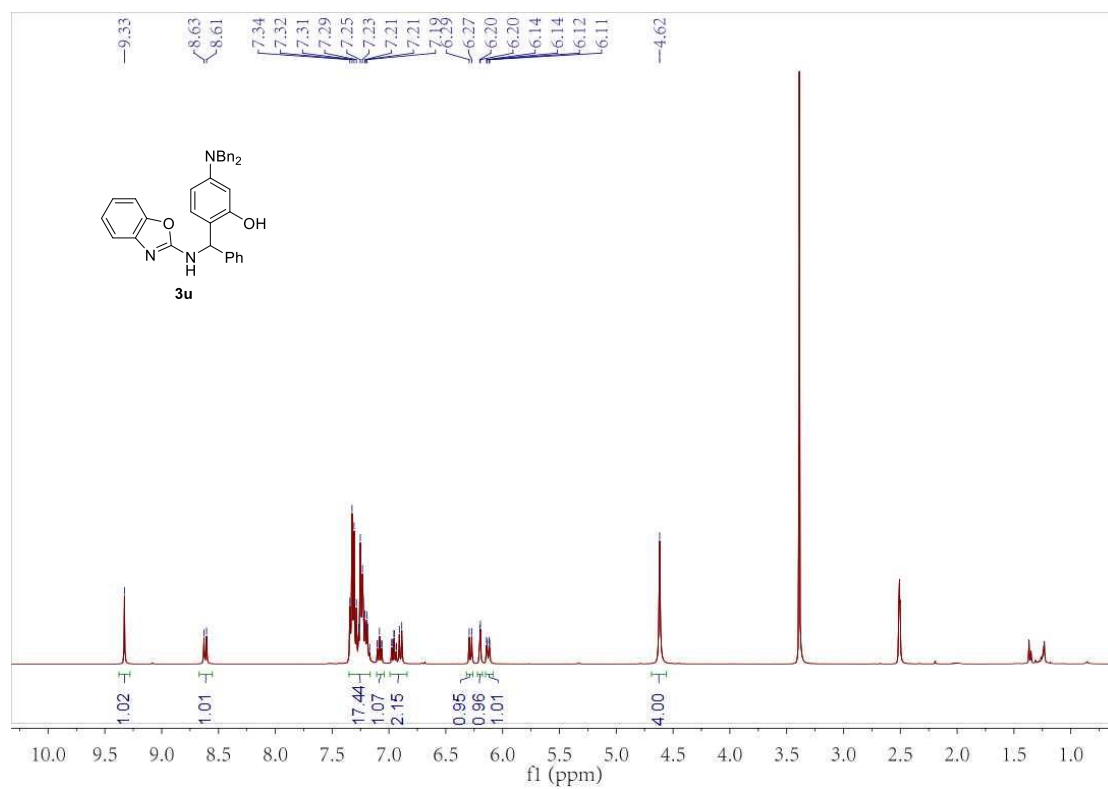

<sup>13</sup>C NMR spectrum of compound **3u** (DMSO, 100 MHz)

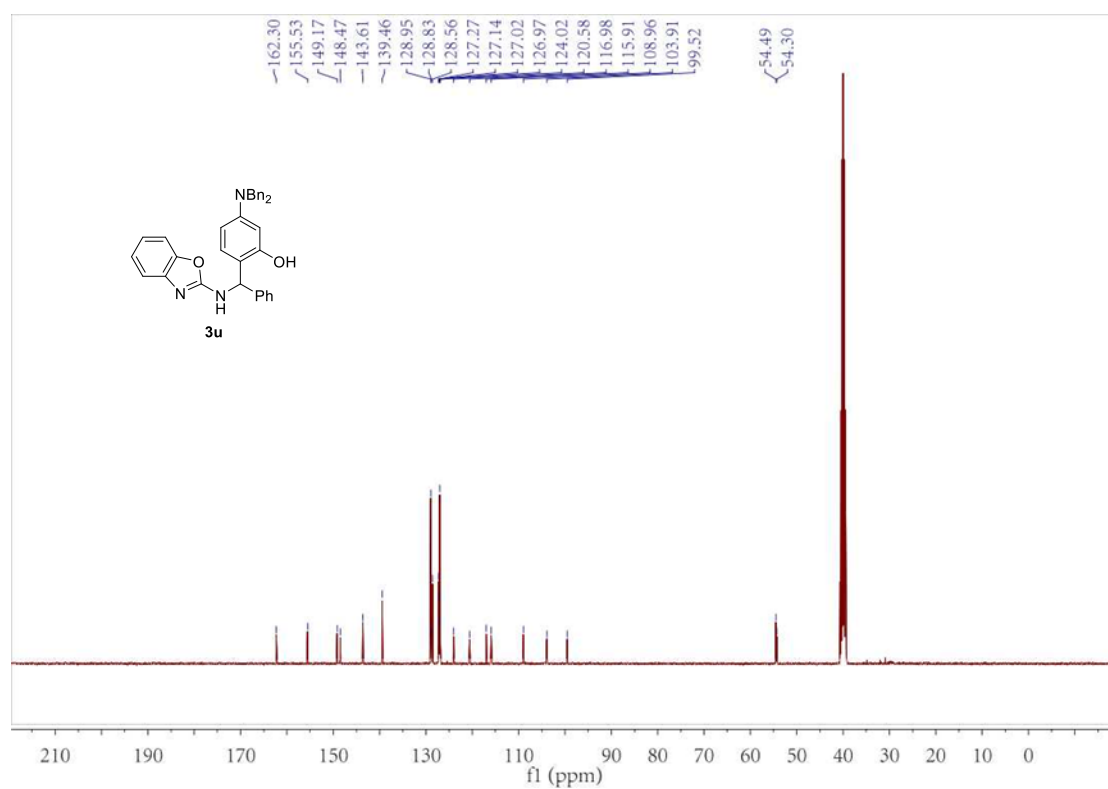

<sup>1</sup>H NMR spectrum of compound **3v** (DMSO, 400 MHz)

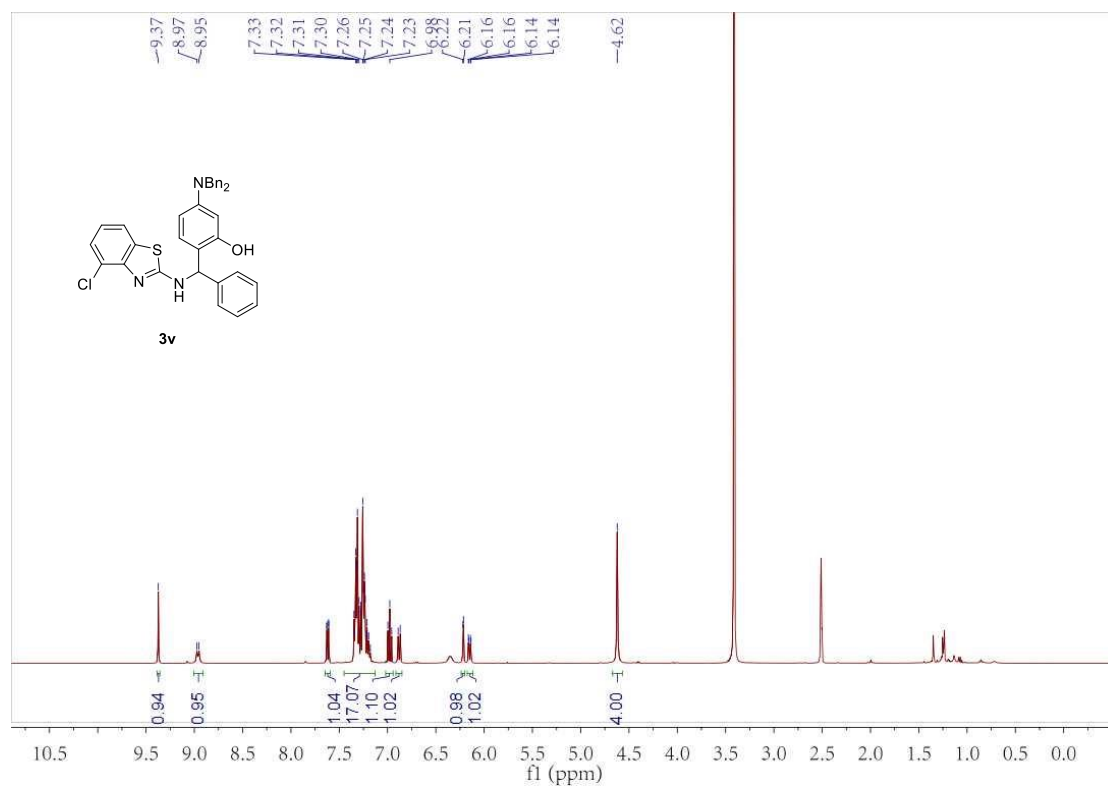

<sup>13</sup>C NMR spectrum of compound **3v** (DMSO, 100 MHz)

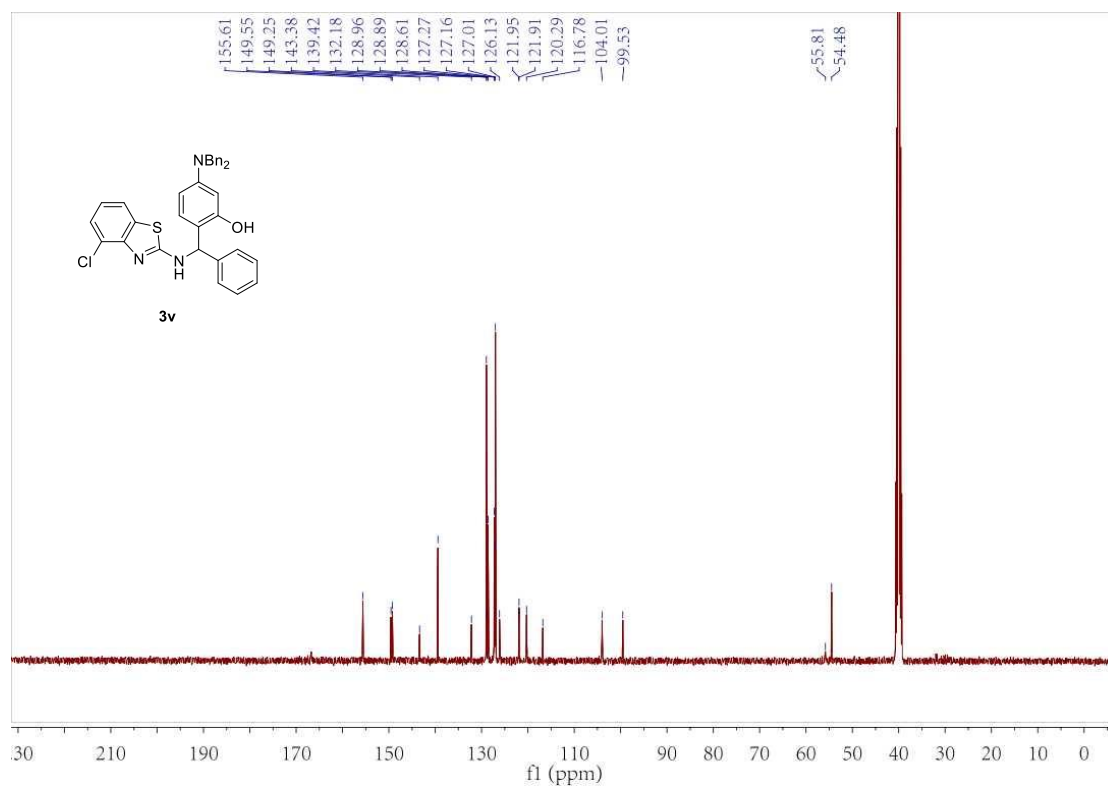

<sup>1</sup>H NMR spectrum of compound **4a** (DMSO, 400 MHz)

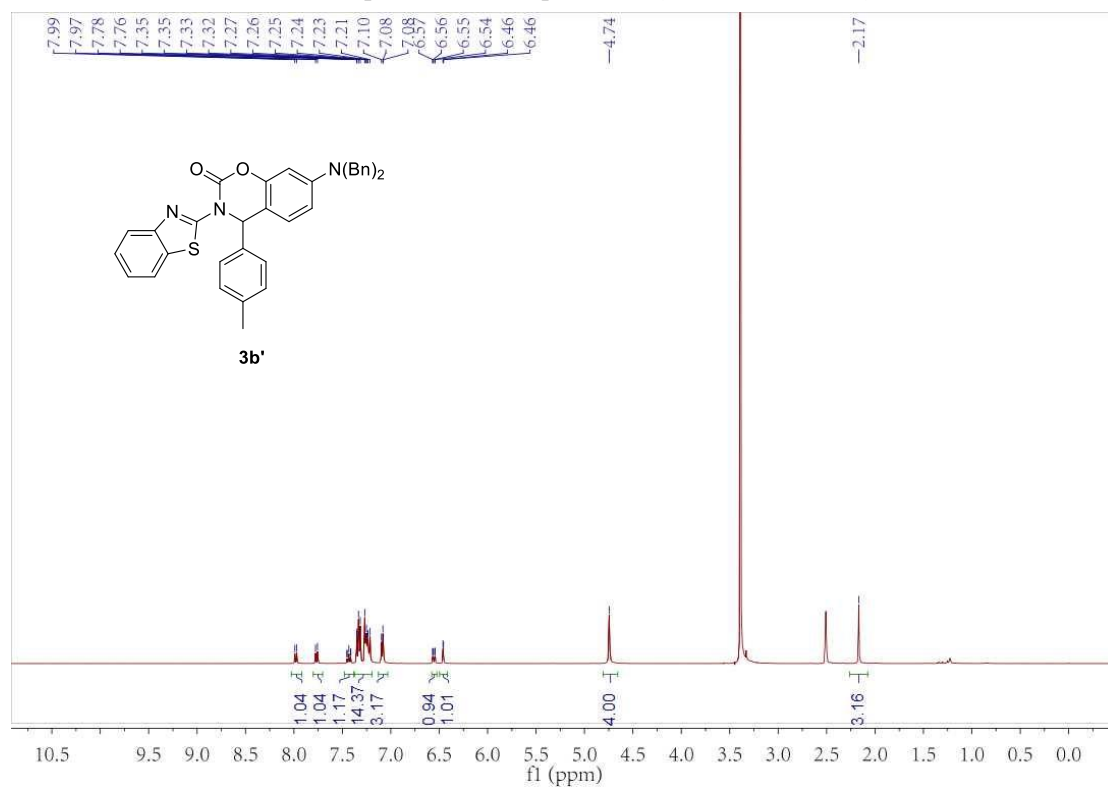

<sup>13</sup>C NMR spectrum of compound **4a** (DMSO, 100 MHz)

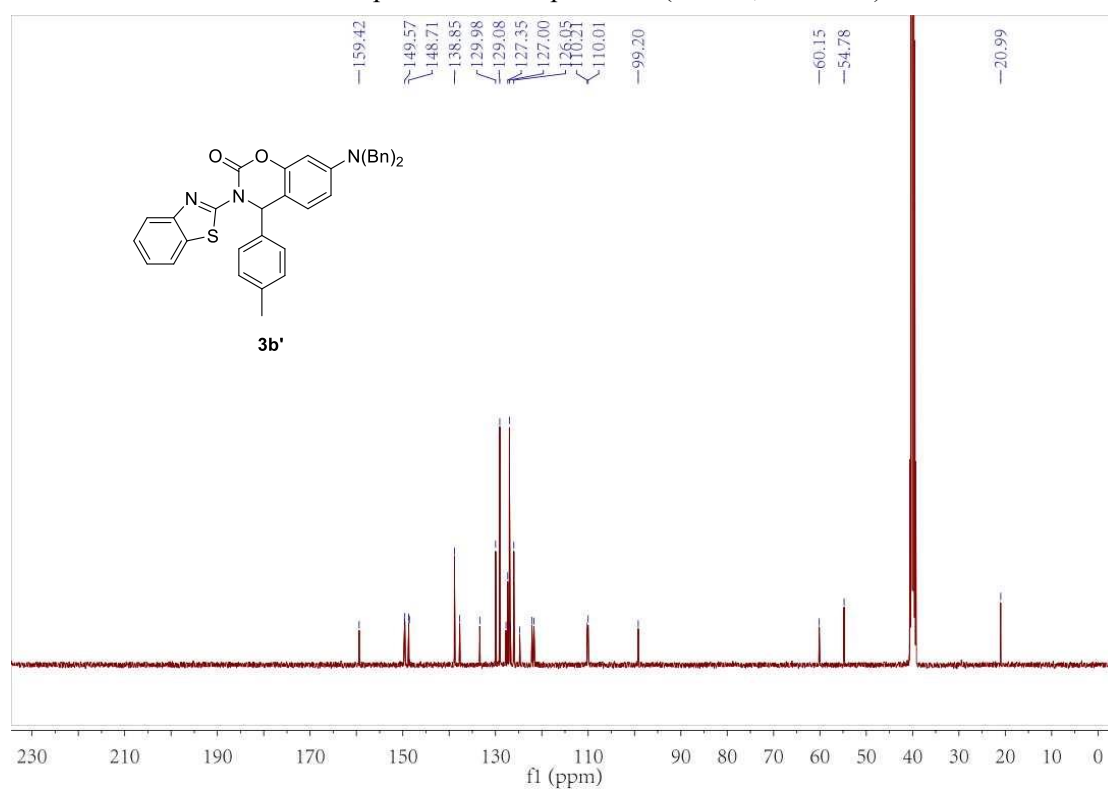

<sup>1</sup>H NMR spectrum of compound **4b** (DMSO, 400 MHz)

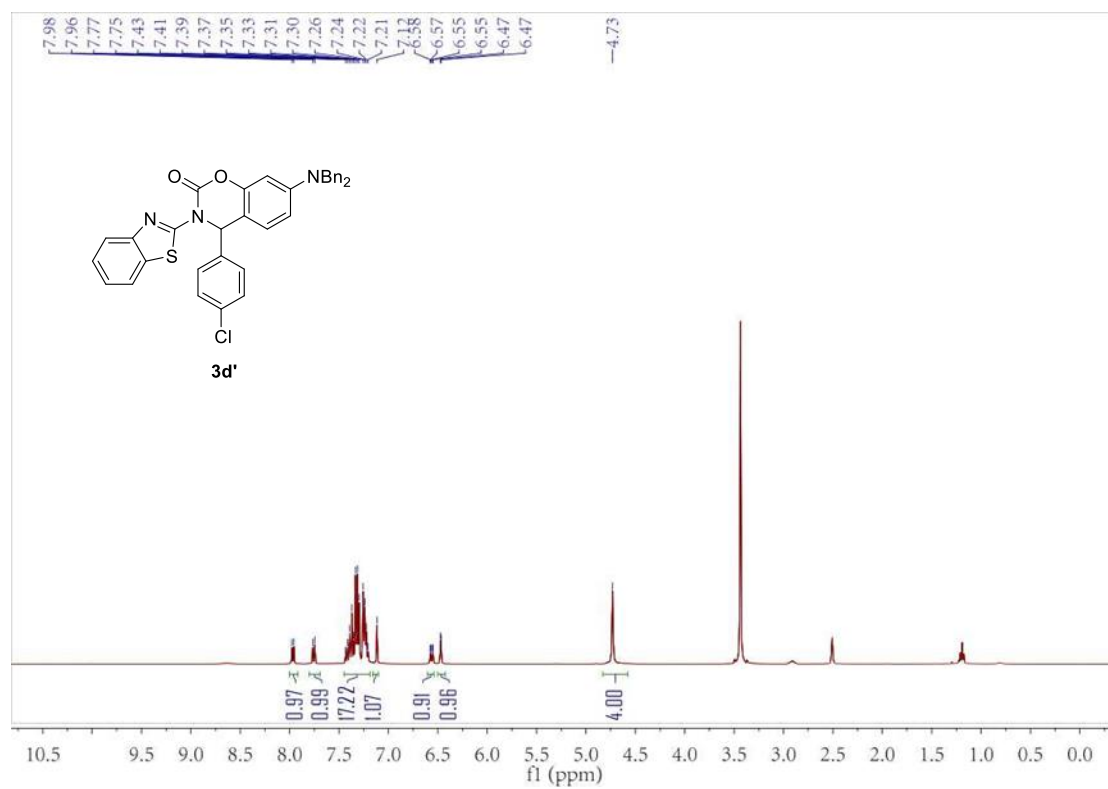

<sup>13</sup>C NMR spectrum of compound **4b** (DMSO, 100 MHz)

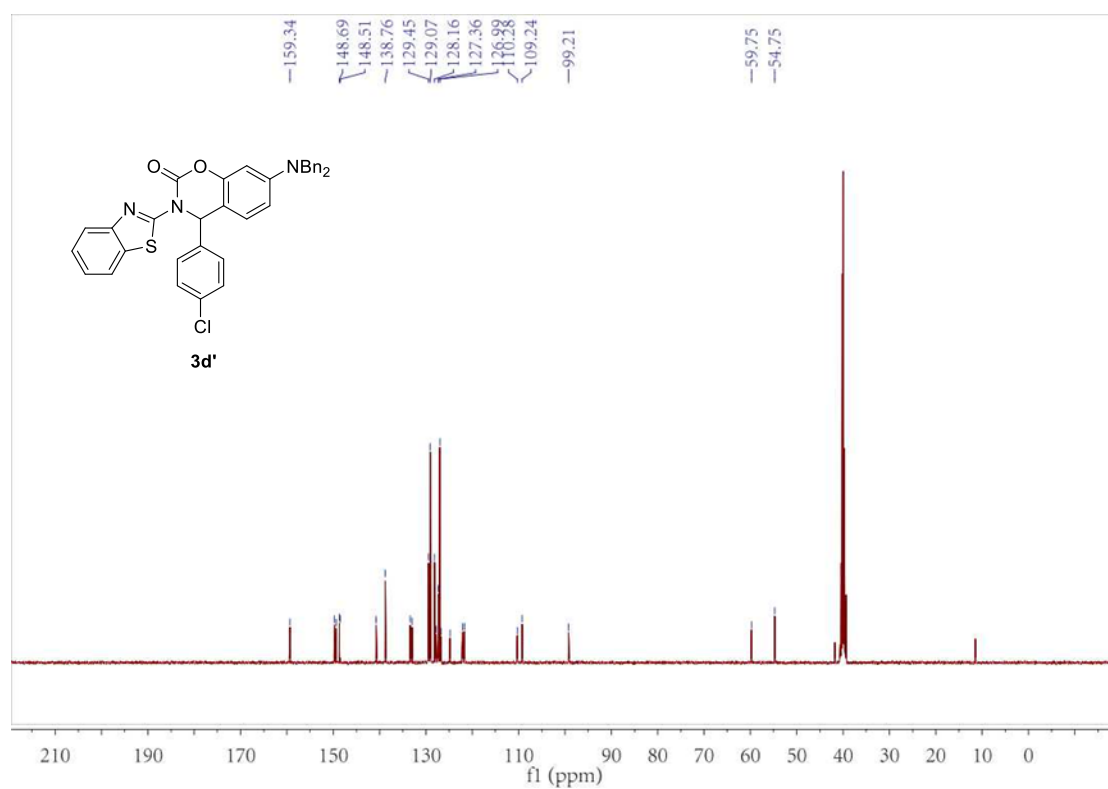

<sup>1</sup>H NMR spectrum of compound **4c** (CDCl<sub>3</sub>, 400 MHz)

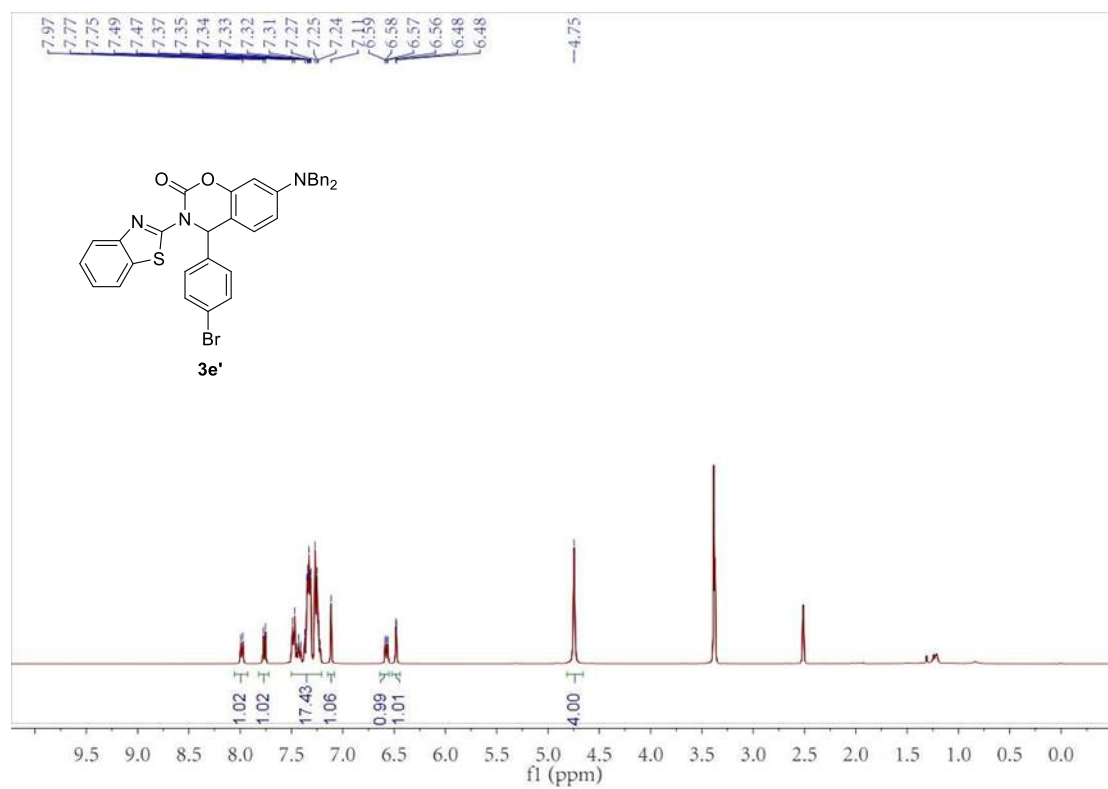

<sup>13</sup>C NMR spectrum of compound **4c** (DMSO, 100 MHz)

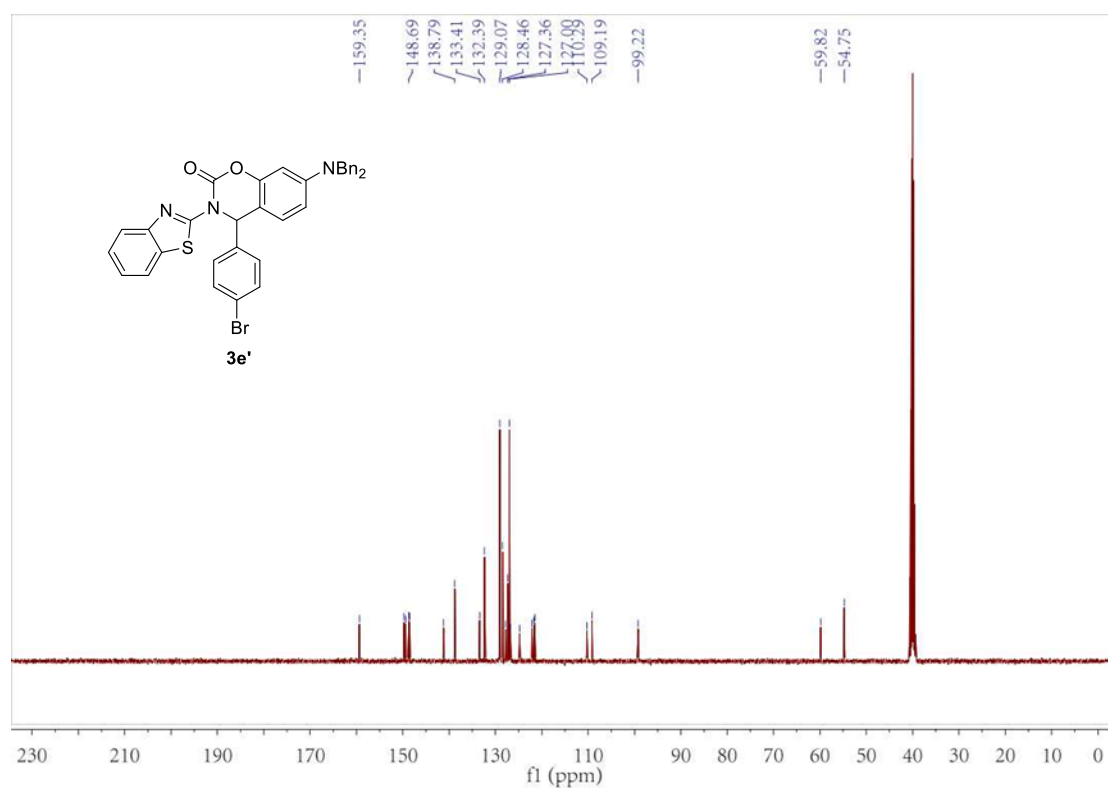

<sup>1</sup>H NMR spectrum of compound **4d** (CDCl<sub>3</sub>, 400 MHz)

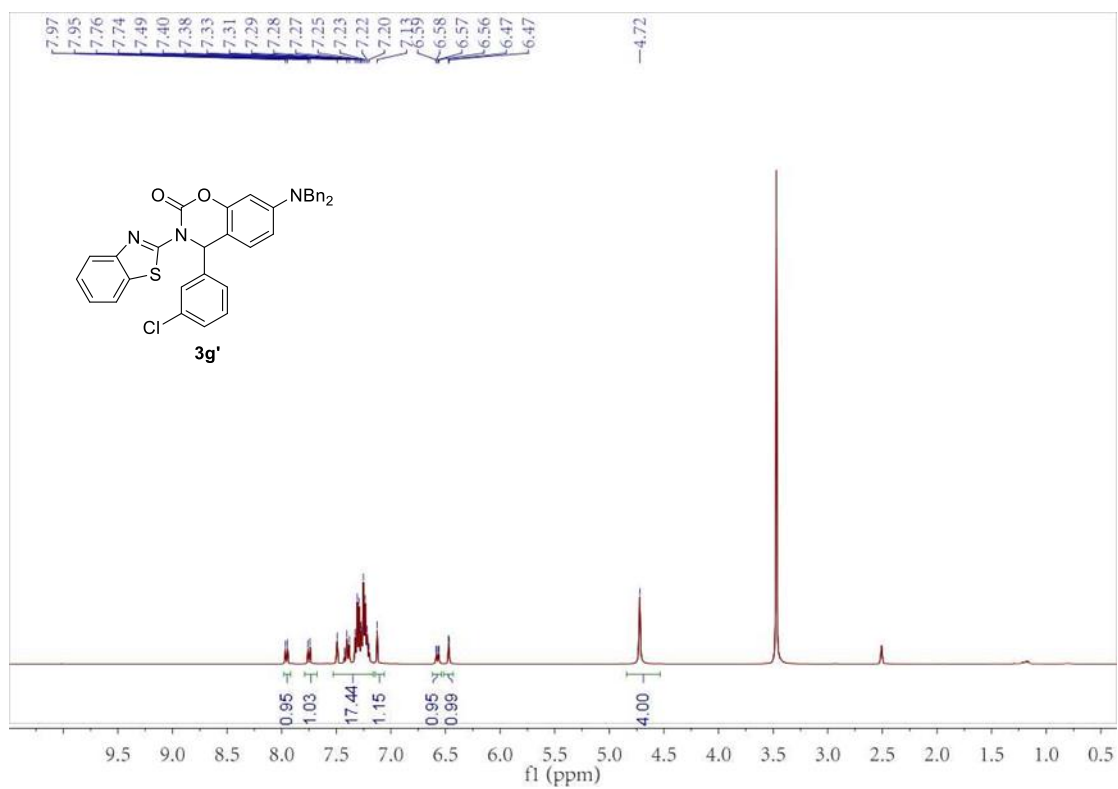

<sup>13</sup>C NMR spectrum of compound **4d** (CDCl<sub>3</sub>, 100 MHz)

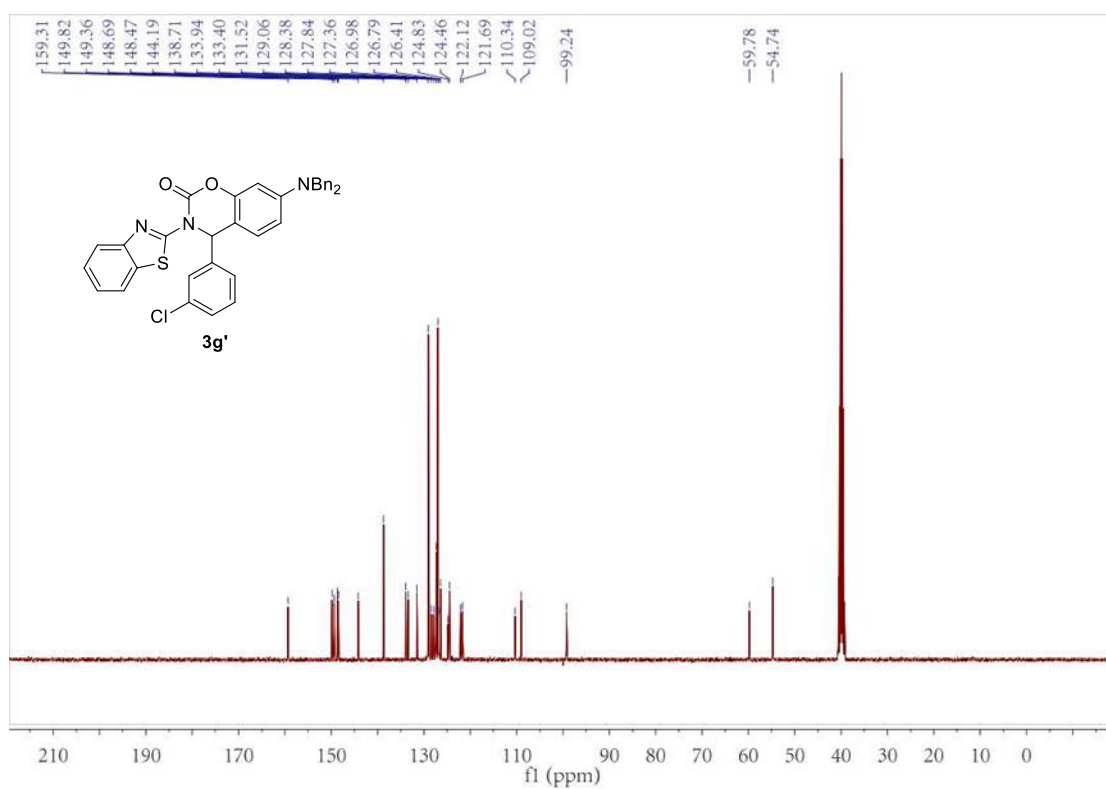

$^1\text{H}$  NMR spectrum of compound **4e** (DMSO, 400 MHz)

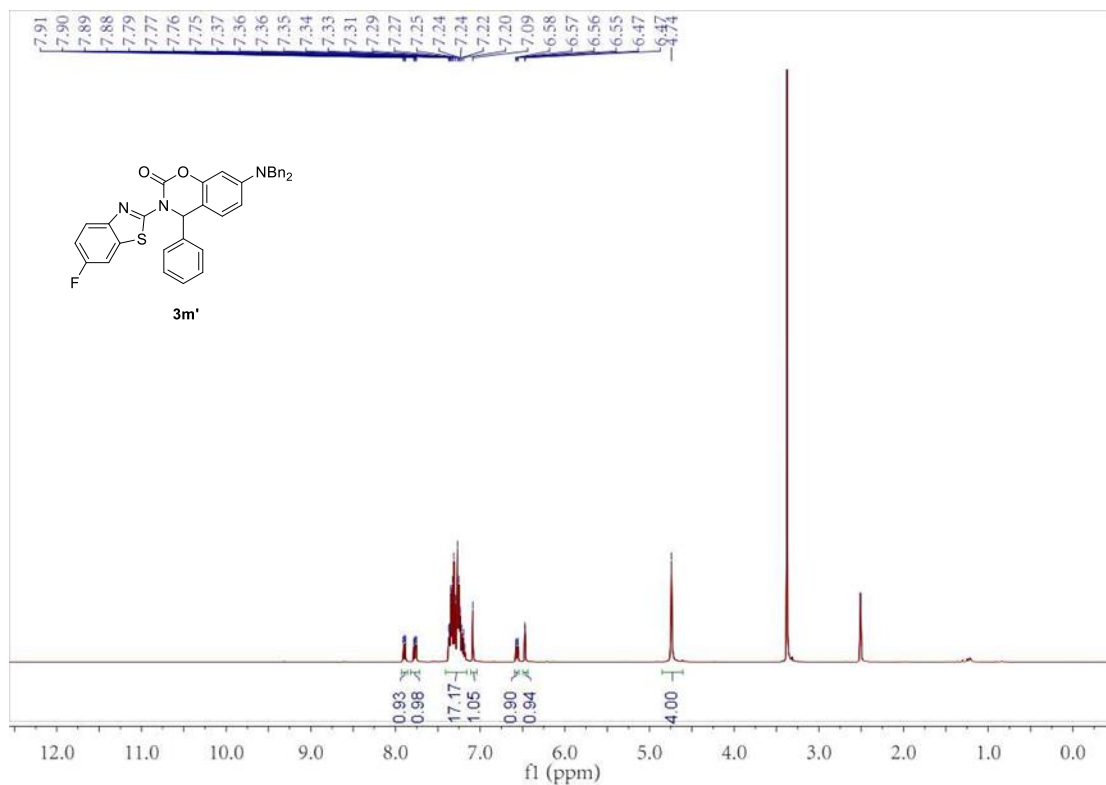

$^{13}\text{C}$  NMR spectrum of compound **4e** (DMSO, 100 MHz)

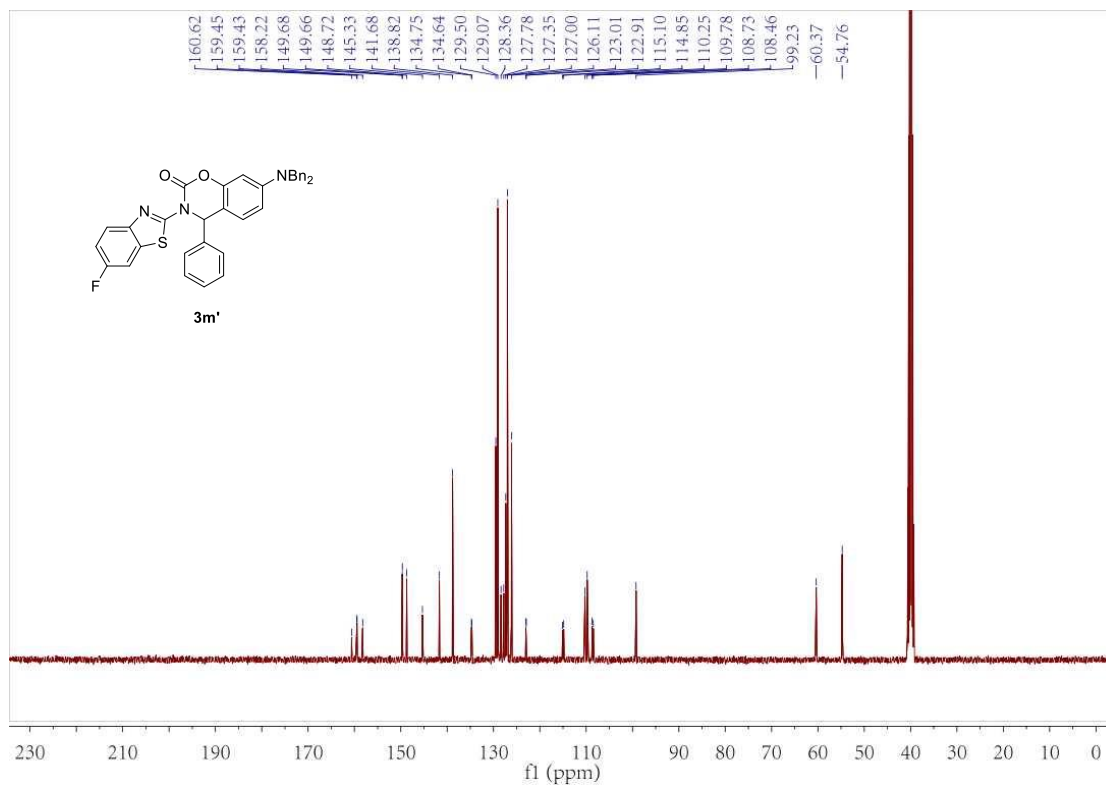



$^{19}\text{F}$  NMR spectrum of compound **4e** (DMSO, 376 MHz)

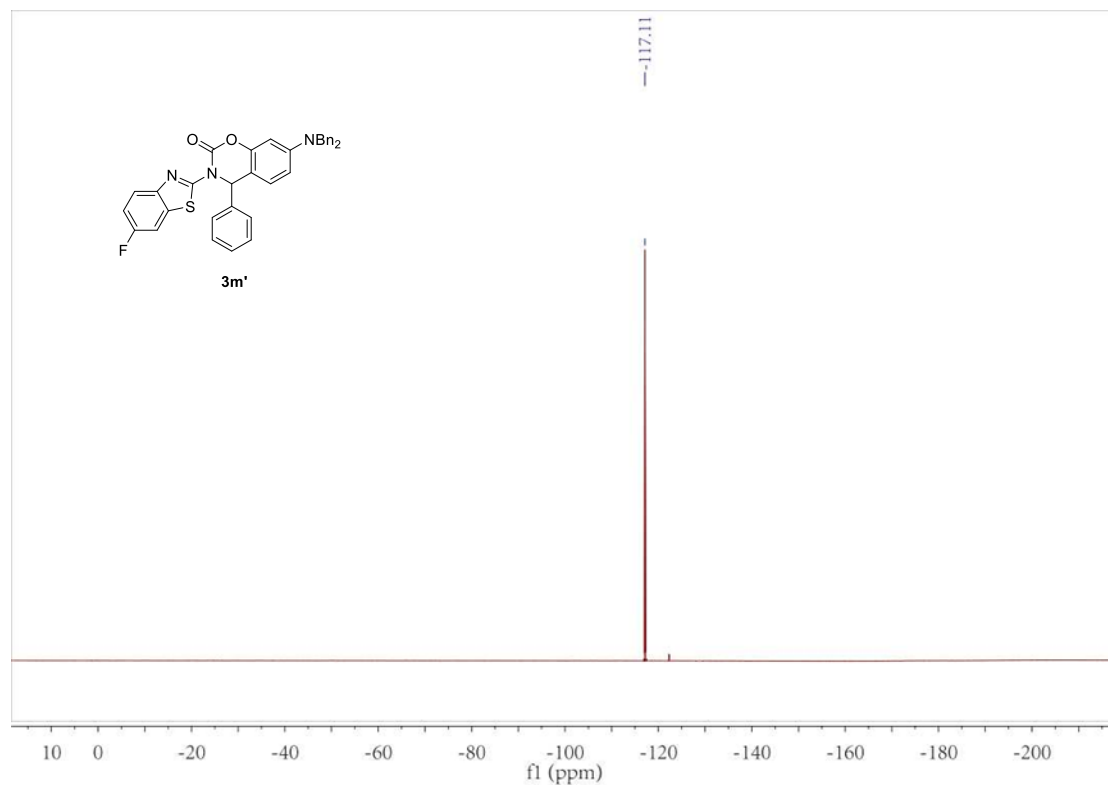

<sup>1</sup>H NMR spectrum of compound **4f** (DMSO, 400 MHz)

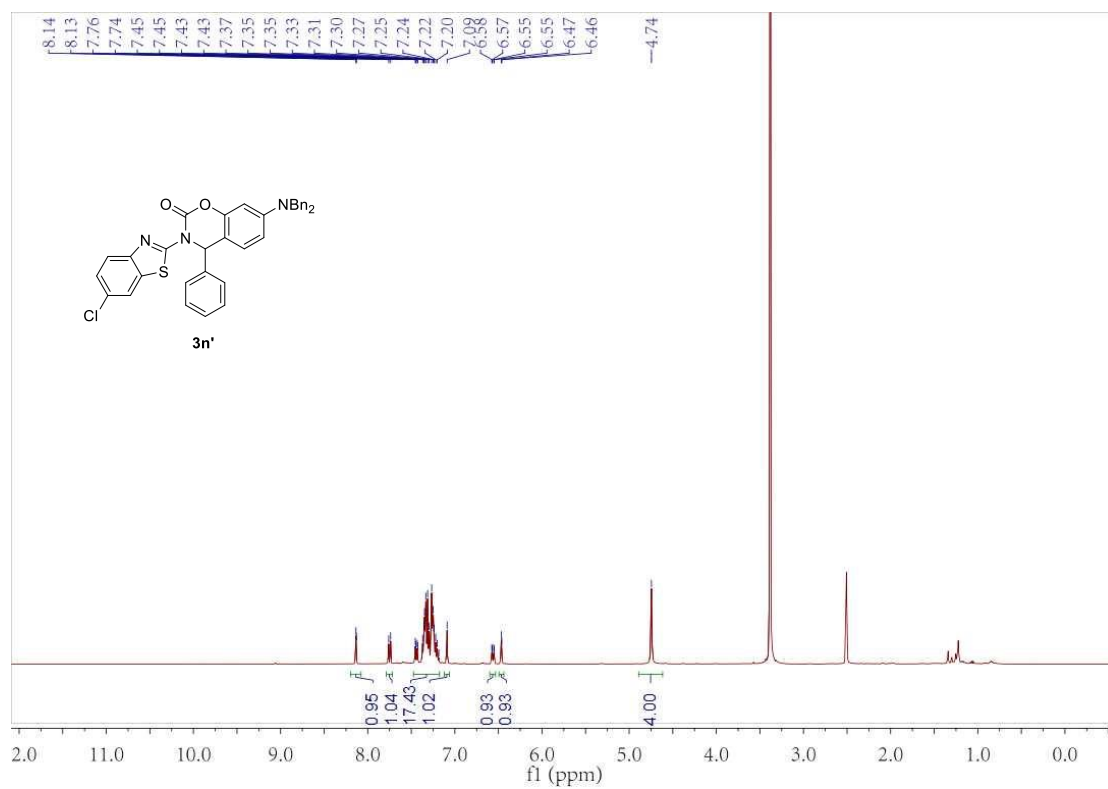

<sup>13</sup>C NMR spectrum of compound **4f** (DMSO, 100 MHz)

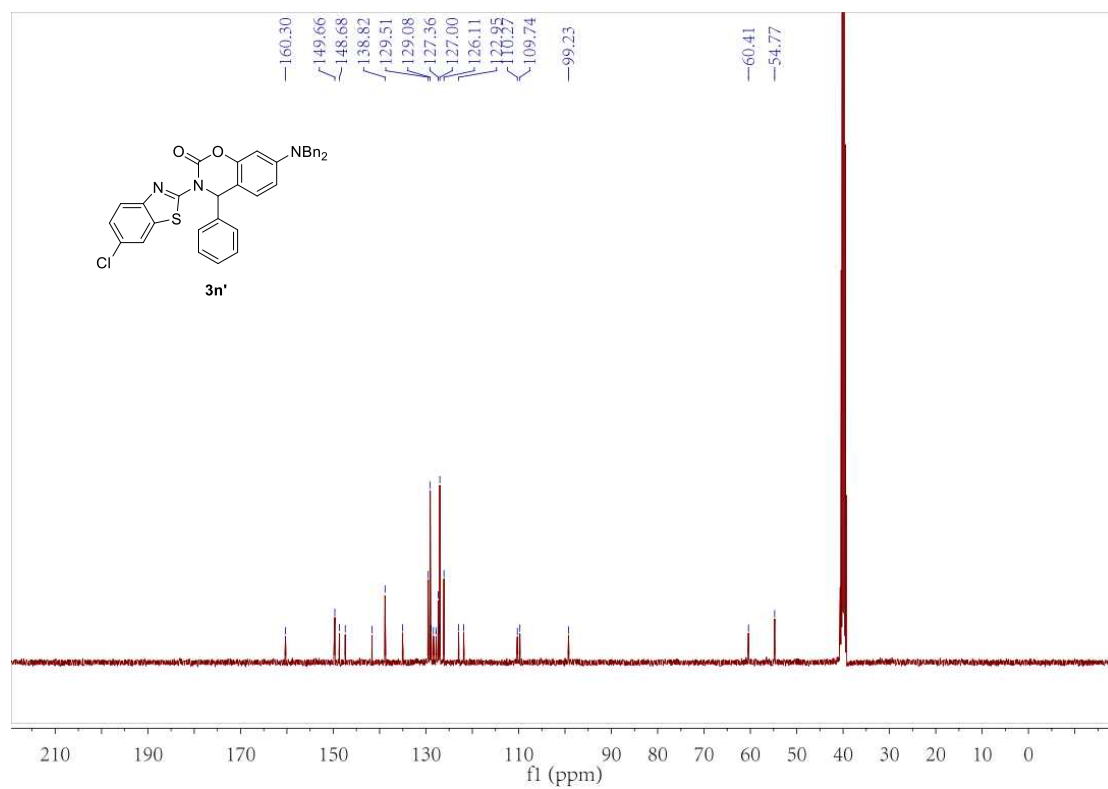

<sup>1</sup>H NMR spectrum of compound 7 (DMSO, 400 MHz)

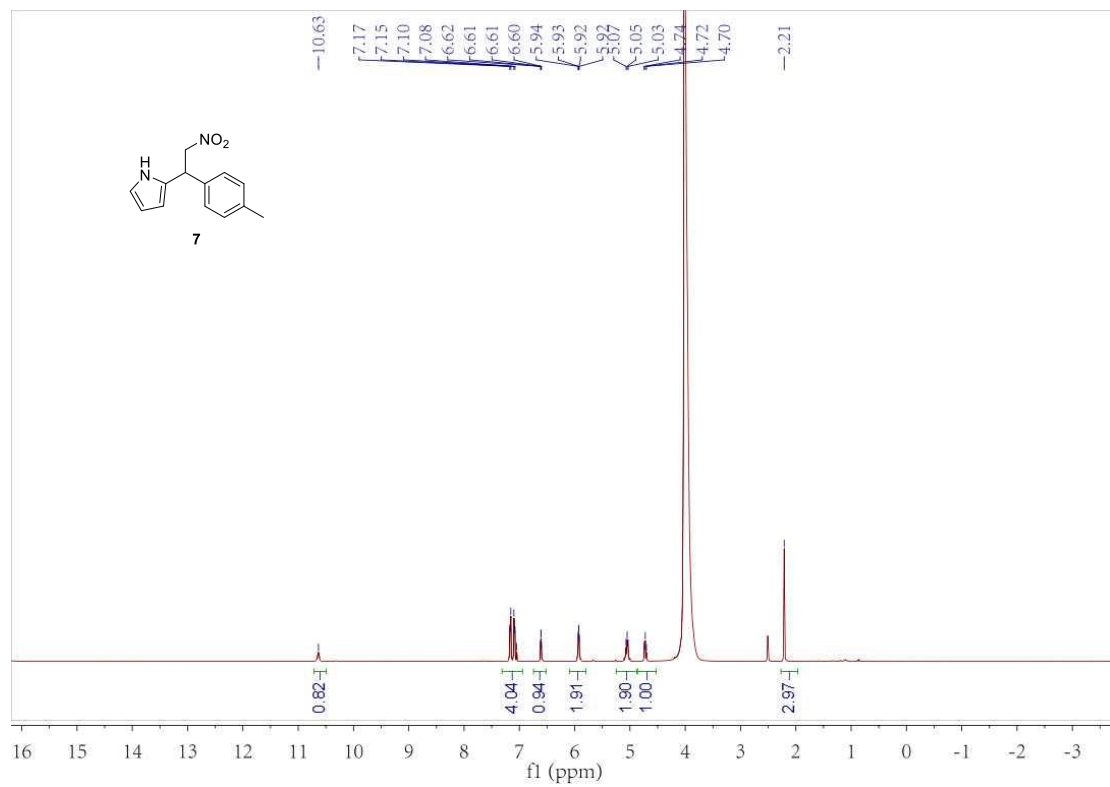

<sup>13</sup>C NMR spectrum of compound 7 (DMSO, 100 MHz)

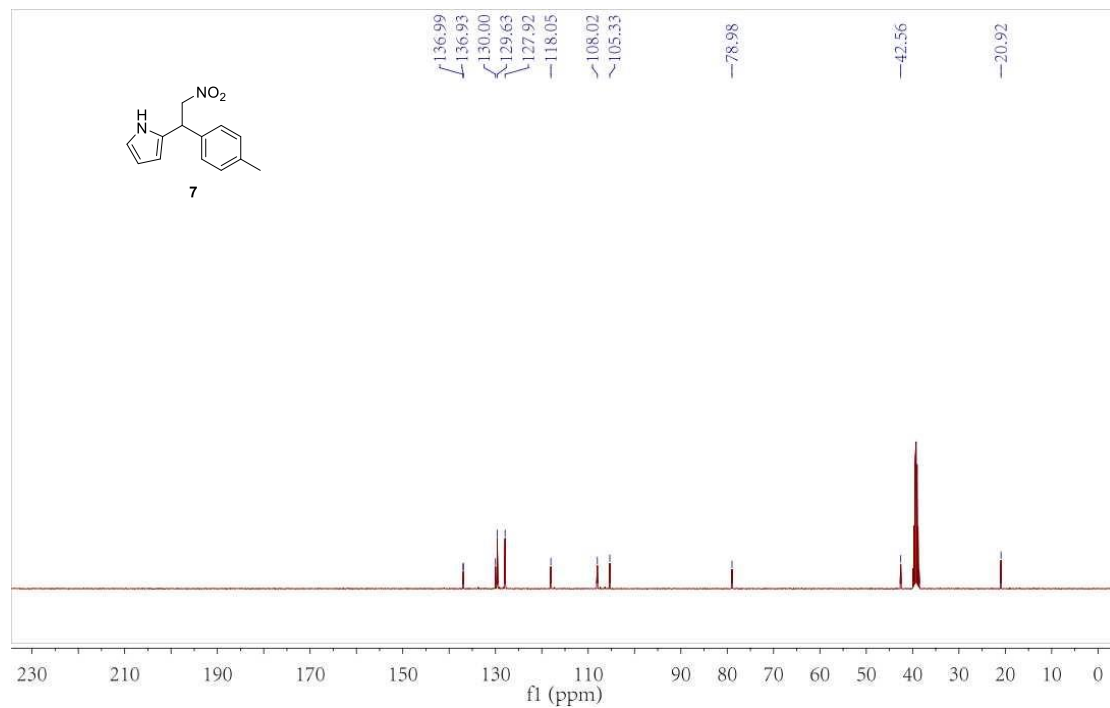

<sup>1</sup>H NMR spectrum of compound S2 (CDCl<sub>3</sub>, 400 MHz)

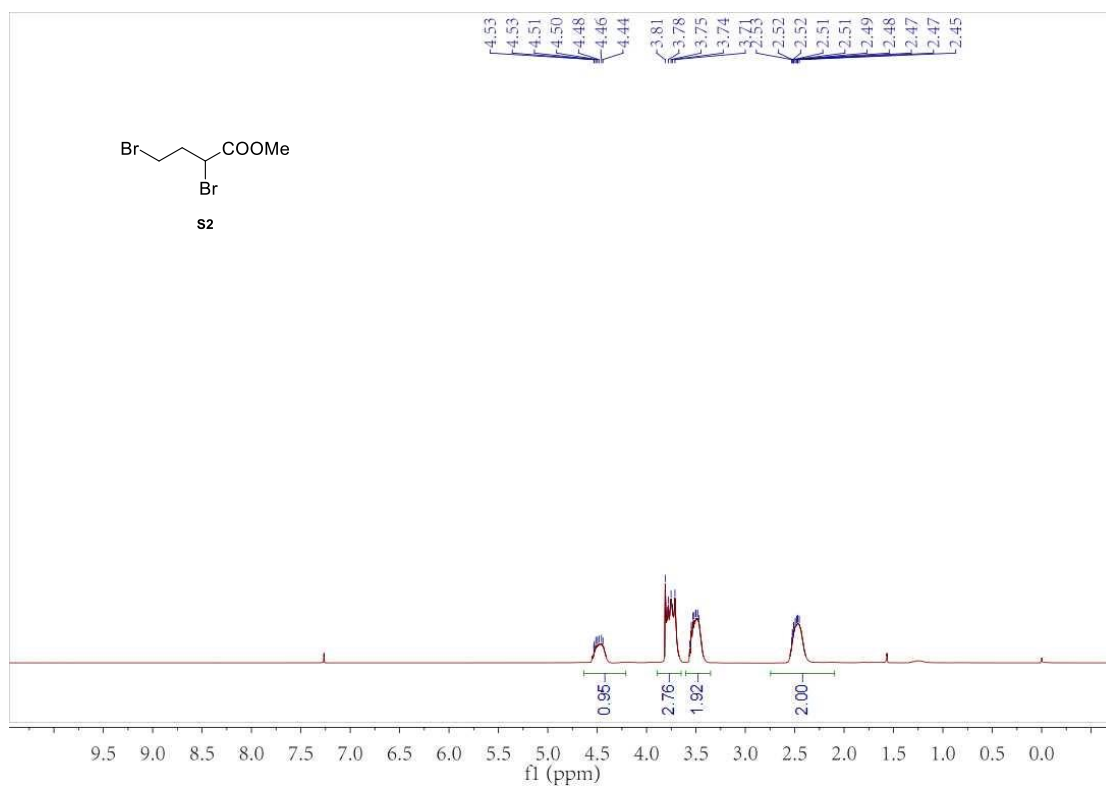

<sup>13</sup>C NMR spectrum of compound S2 (CDCl<sub>3</sub>, 100 MHz)

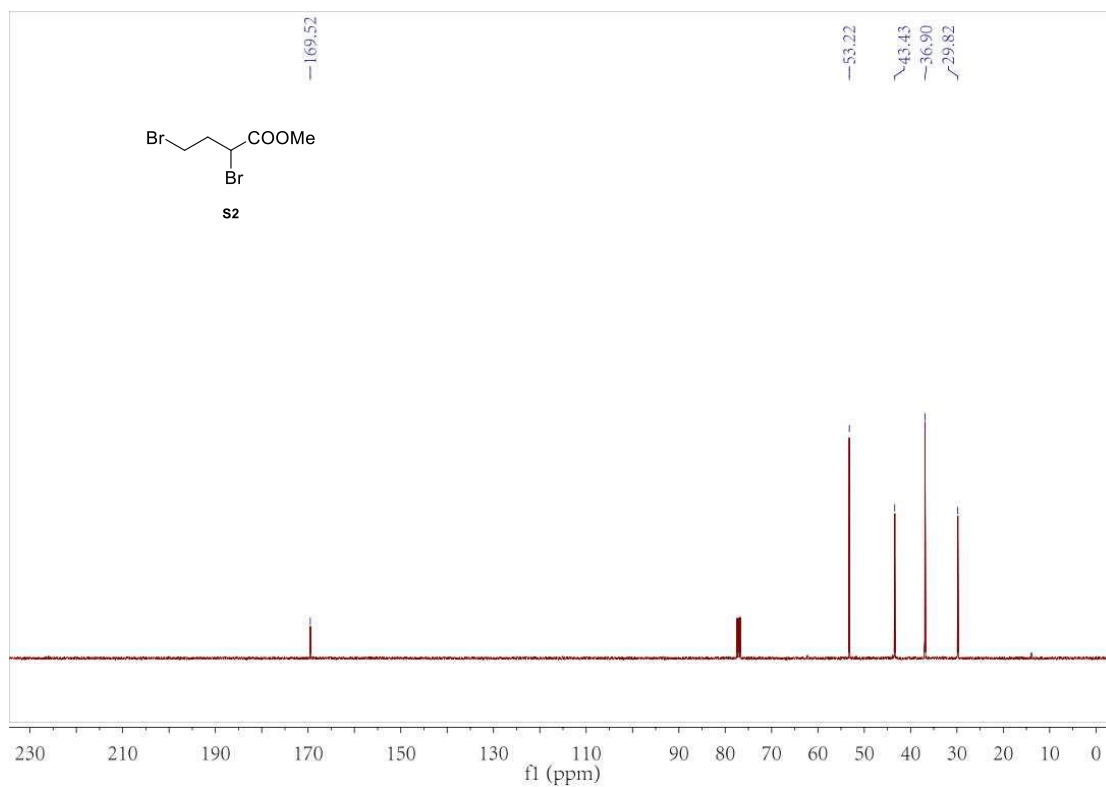

<sup>1</sup>H NMR spectrum of compound S3 (CDCl<sub>3</sub>, 400 MHz)

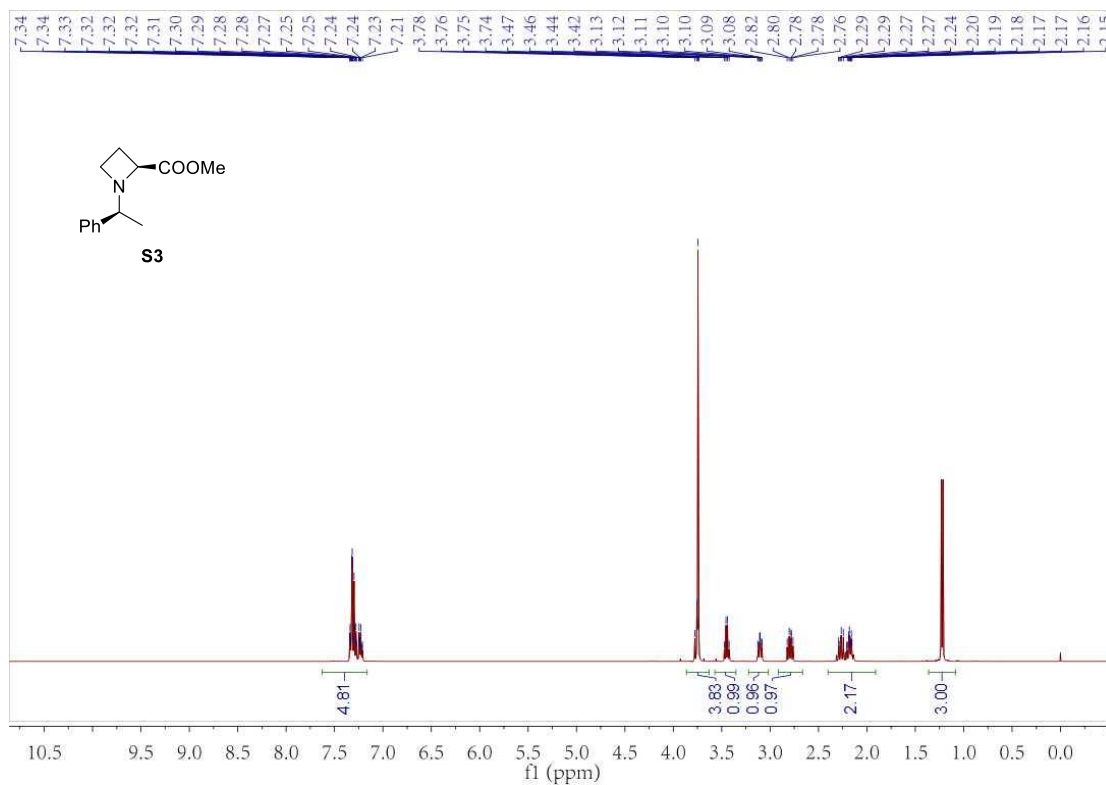

<sup>13</sup>C NMR spectrum of compound S3 (CDCl<sub>3</sub>, 100 MHz)

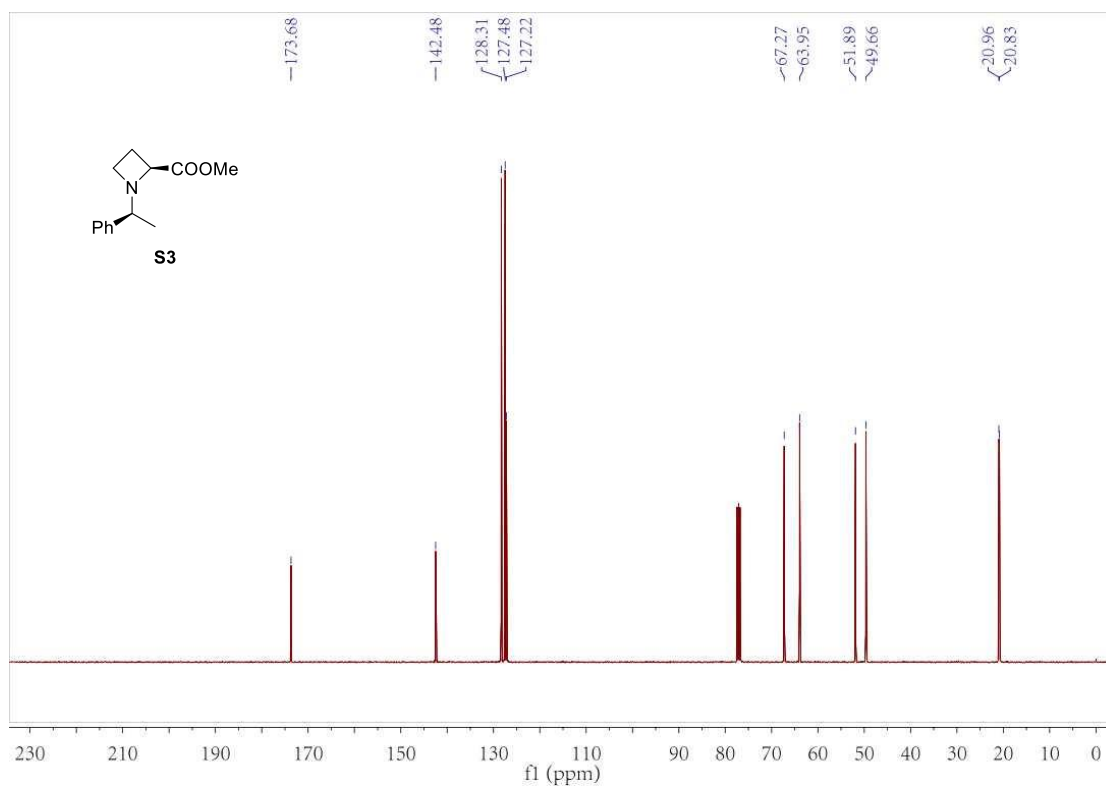

<sup>1</sup>H NMR spectrum of compound S4 (CDCl<sub>3</sub>, 400 MHz)

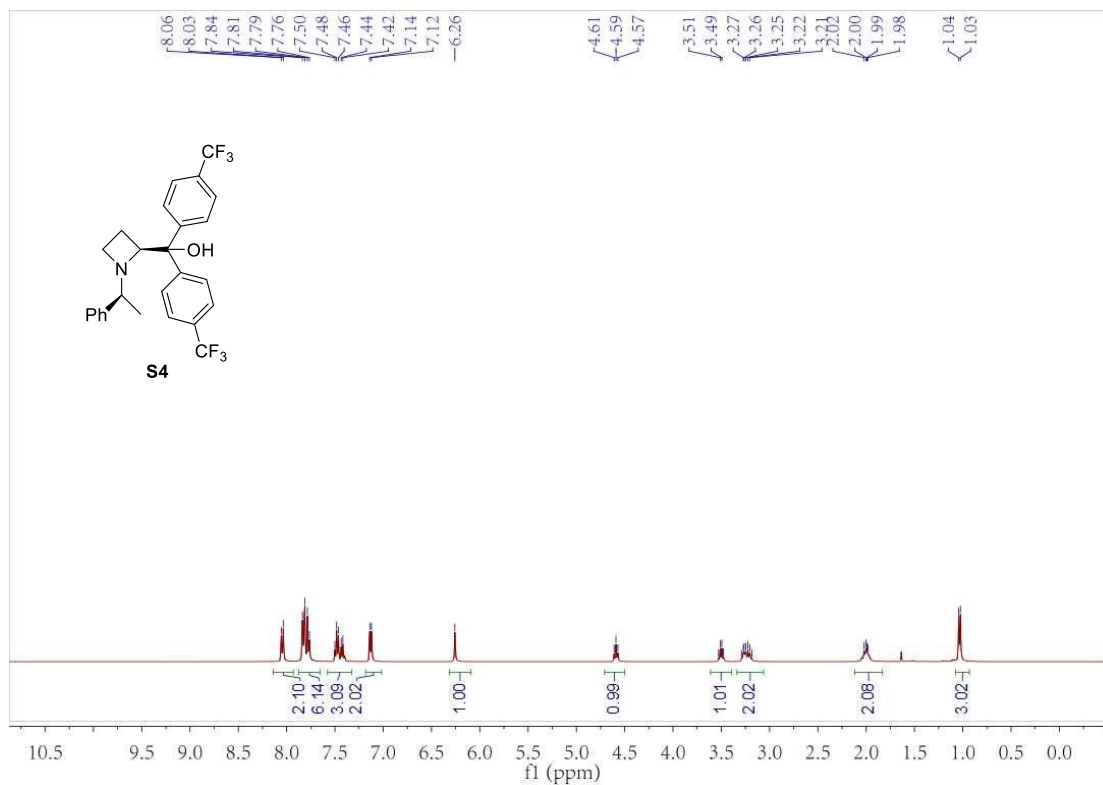

<sup>13</sup>C NMR spectrum of compound S4 (CDCl<sub>3</sub>, 100 MHz)

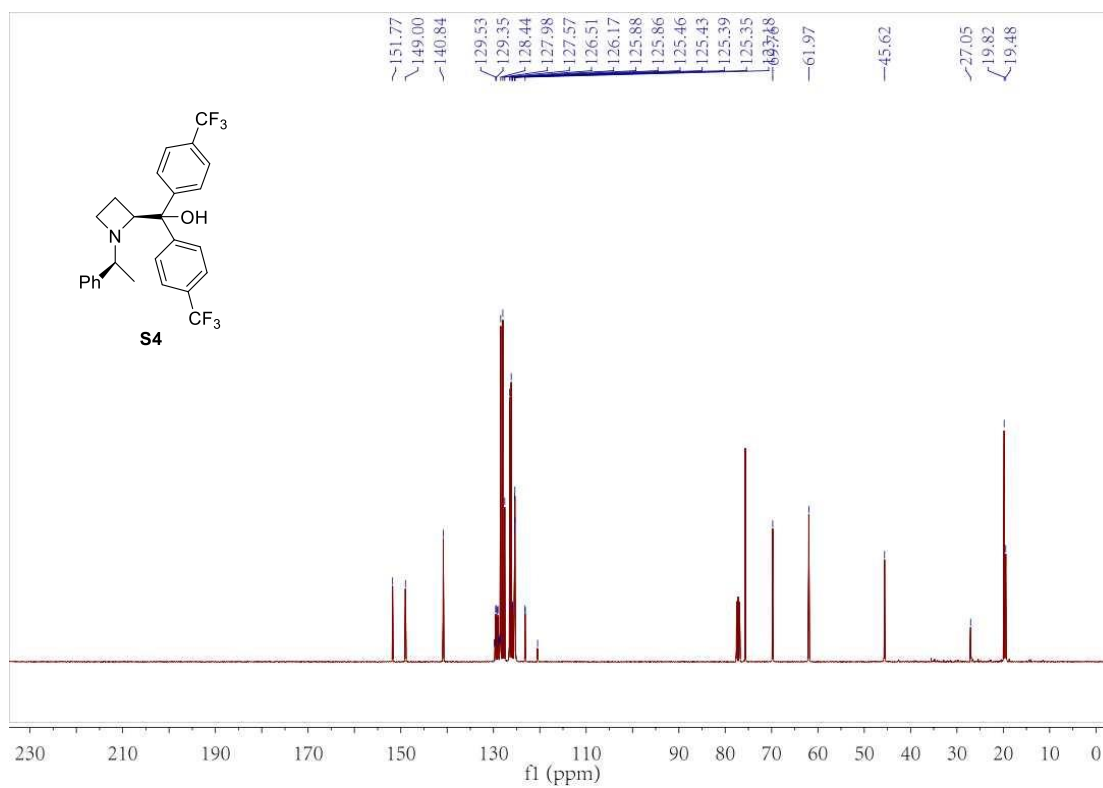

$^{19}\text{F}$  NMR spectrum of compound **S4** ( $\text{CDCl}_3$ , 376 MHz)

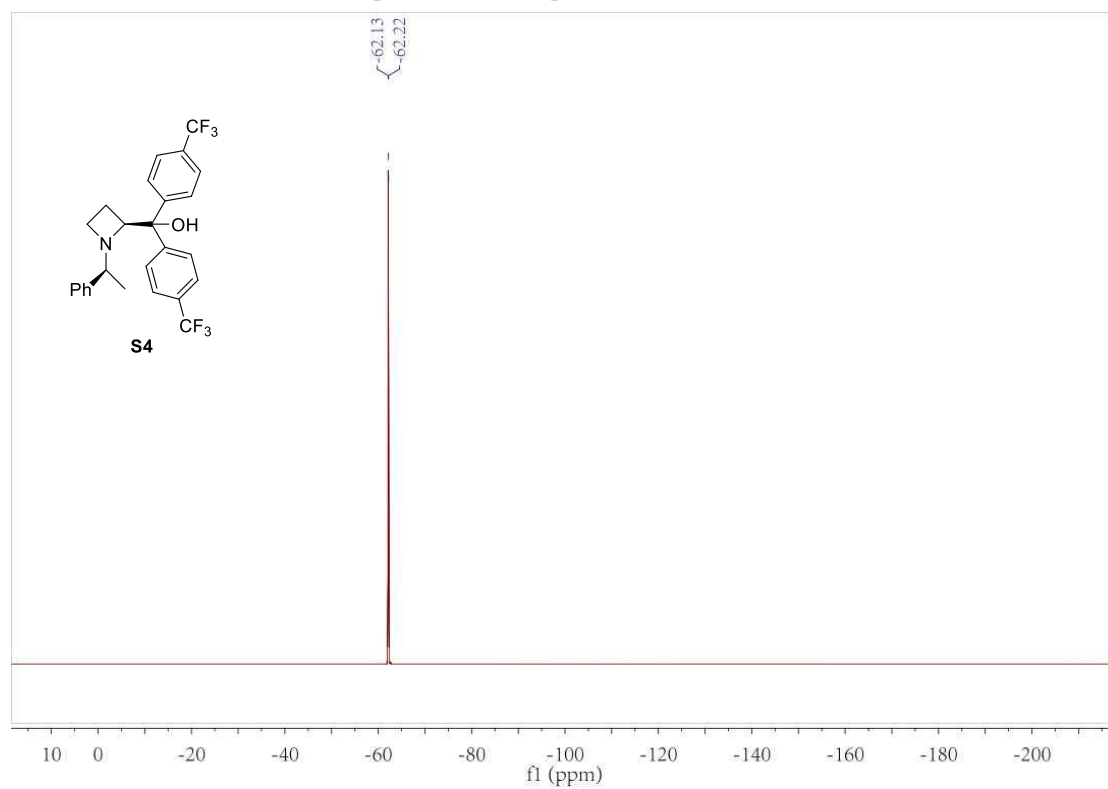

<sup>1</sup>H NMR spectrum of compound **S5** (DMSO, 400 MHz)

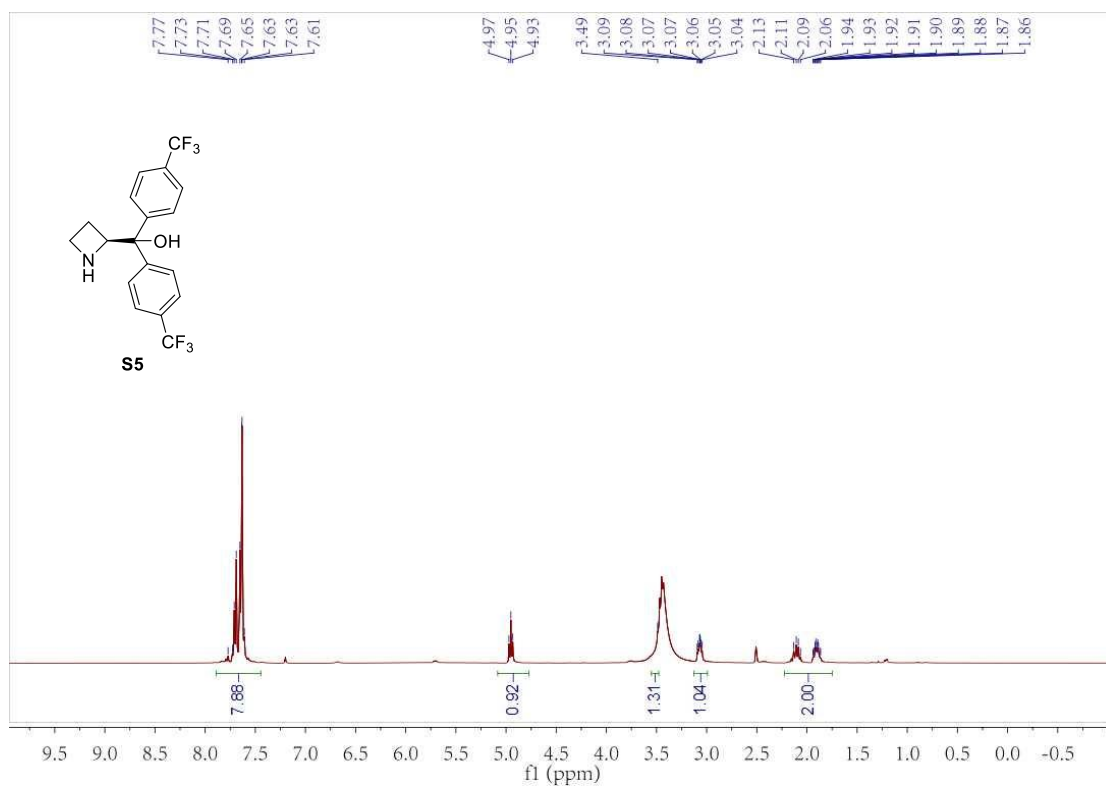

<sup>13</sup>C NMR spectrum of compound **S5** (DMSO, 100 MHz)

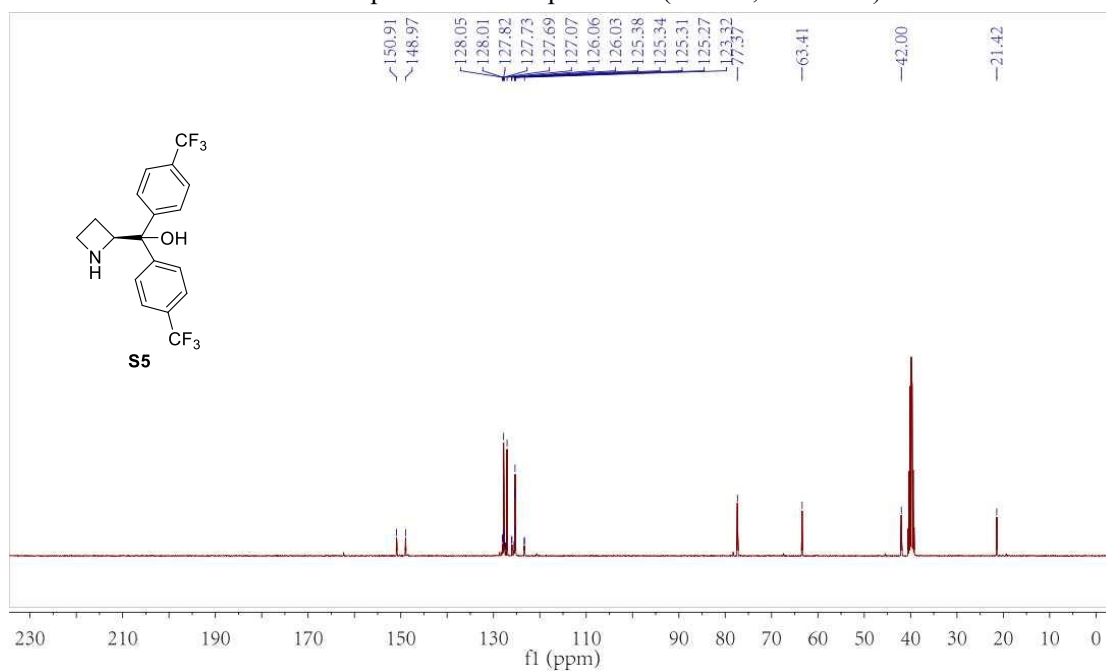



<sup>19</sup>F NMR spectrum of compound **2-6** (DMSO, 376 MHz)

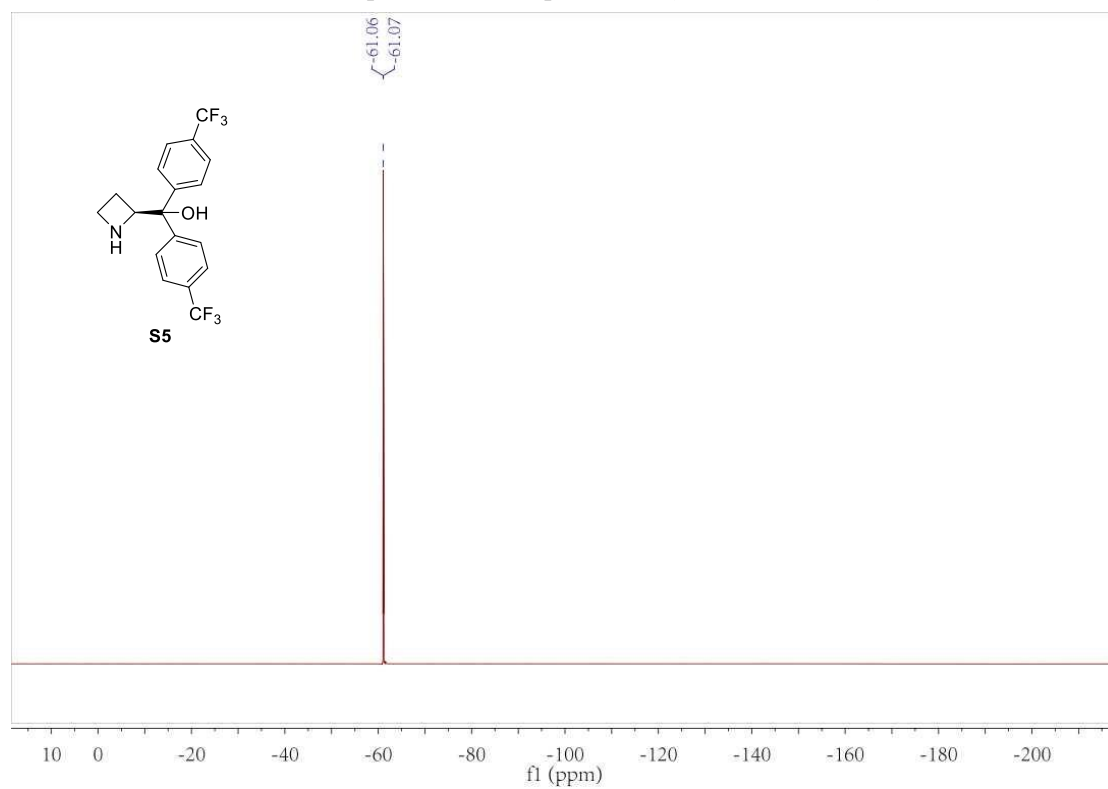

<sup>1</sup>H NMR spectrum of compound **L4-3** (CDCl<sub>3</sub>, 400 MHz)

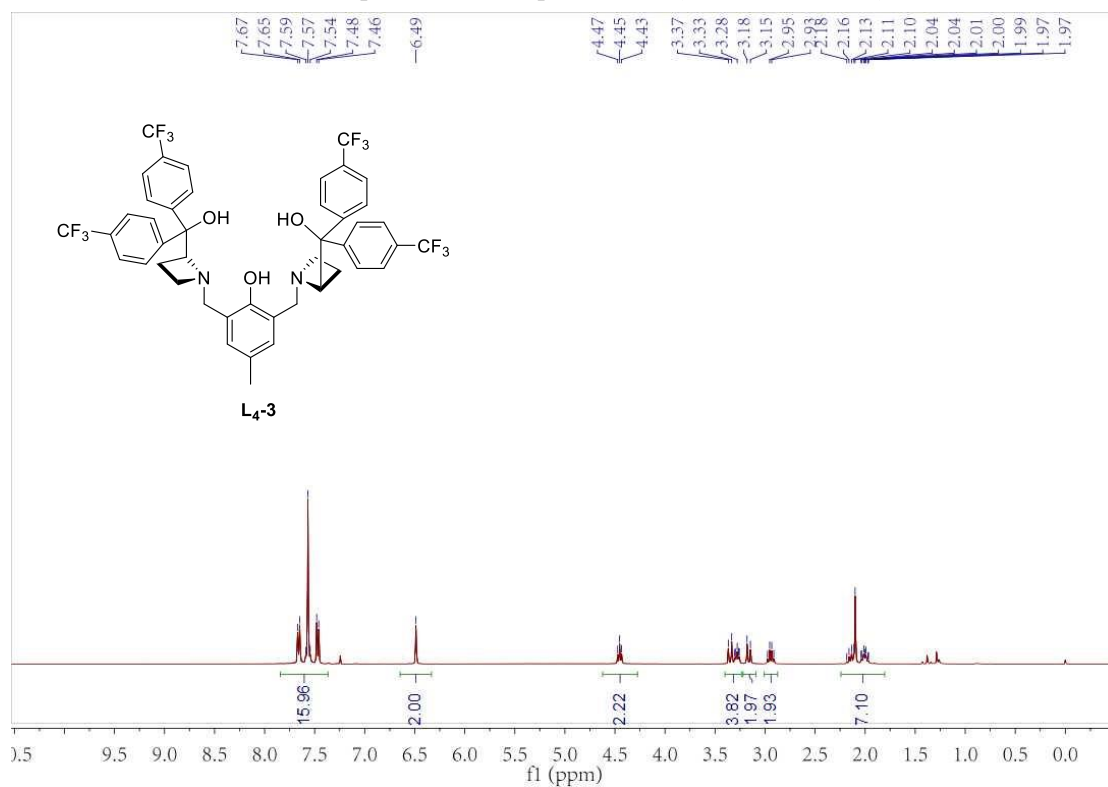

<sup>13</sup>C NMR spectrum of compound **L4-3** (CDCl<sub>3</sub>, 400 MHz)

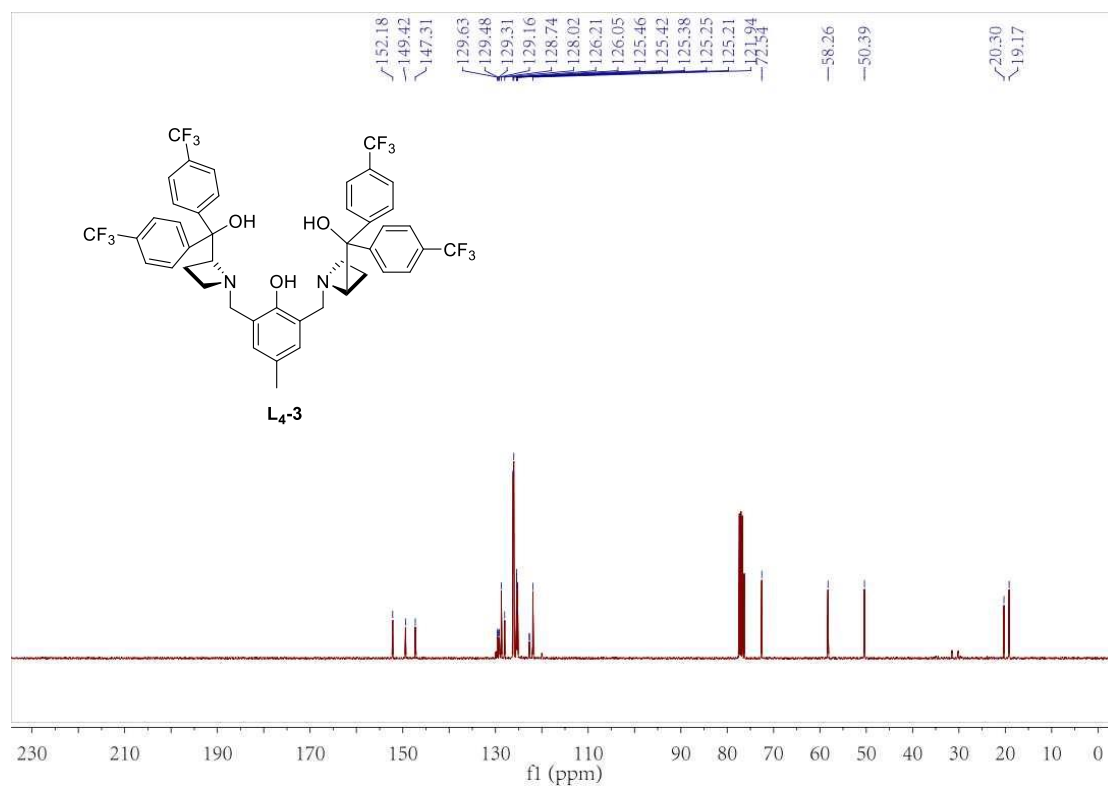

$^{19}\text{F}$  NMR spectrum of compound **L4-3** ( $\text{CDCl}_3$ , 376 MHz)

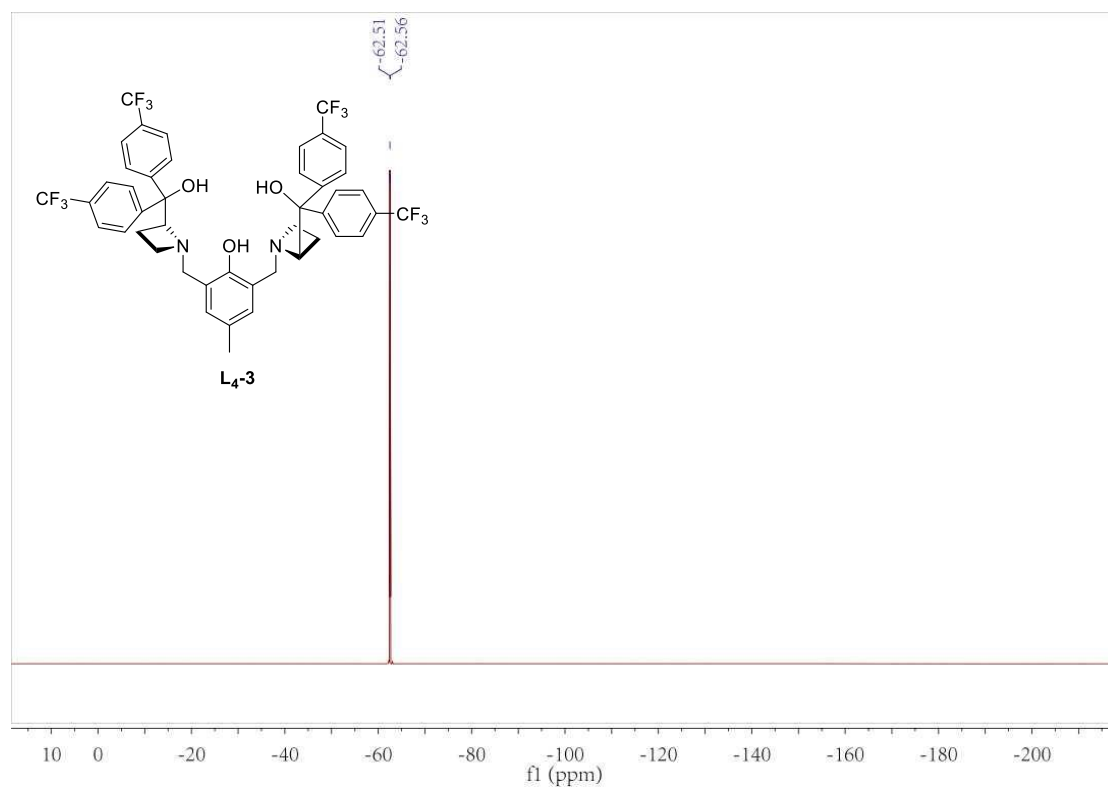

## 11. References

- [1] Andriy, B.; Oleksandr, M.; Dmytro, K.; Volodymyr, S.; Mykhailo, V.; Oleksandr, I.; Elena, I.; Dmytro, I.; Alina, S.; Oleg, K.; Med, J. Coumarin carboxylic acids as monocarboxylate transporter 1 inhibitors: In vitro and in vivo studies as potential anticancer agents. *Bioorg. Med. Chem. Lett.* **26** (2016) 3282–3286.
- [2] María, F.; Ana, C. C.; Dr, A. F.; Dr, J. A. A General Asymmetric Formal Synthesis of Aza-Baylis–Hillman Type Products under Bifunctional Catalysis. *Chem. Eur. J.* **2018**, *24*, 3117–3.
- [3] Frisch, M. J.; Trucks, G. W.; Schlegel, H. B.; Scuseria, G. E.; Robb, M. A.; Cheeseman, J. R.; Scalmani, G.; Barone, V.; Petersson, G. A.; Nakatsuji, H.; Li, X.; Caricato, M.; Marenich, A. V.; Bloino, J.; Janesko, B. G.; Gomperts, R.; Mennucci, B.; Hratchian, H. P.; Ortiz, J. V.; Izmaylov, A. F.; Sonnenberg, J. L.; Williams-Young, D.; Ding, F.; Lipparini, F.; Egidi, F.; Goings, J.; Peng, B.; Petrone, A.; Henderson, T.; Ranasinghe, D.; Zakrzewski, V. G.; Gao, J.; Rega, N.; Zheng, G.; Liang, W.; Hada, M.; Ehara, M.; Toyota, K.; Fukuda, R.; Hasegawa, J.; Ishida, M.; Nakajima, T.; Honda, Y.; Kitao, O.; Nakai, H.; Vreven, T.; Throssell, K.; Montgomery, J. A., Jr.; Peralta, J. E.; Ogliaro, F.; Bearpark, M. J.; Heyd, J. J.; Brothers, E. N.; Kudin, K. N.; Staroverov, V. N.; Keith, T. A.; Kobayashi, R.; Normand, J.; Raghavachari, K.; Rendell, A. P.; Burant, J. C.; Iyengar, S. S.; Tomasi, J.; Cossi, M.; Millam, J. M.; Klene, M.; Adamo, C.; Cammi, R.; Ochterski, J. W.; Martin, R. L.; Morokuma, K.; Farkas, O.; Foresman, J. B.; Fox, D. J. *Gaussian 16*, Revision C.01, Gaussian, Inc.: Wallingford, CT, 2019.
- [4] Becke, A. D. Density-functional Exchange-energy Approximation with Correct Asymptotic Behavior. *Phys. Rev. A.* **1988**, *38*, 3098-3100.
- [5] Lee, C.; Yang, W.; Parr, R. G. Development of the Colle-Salvetti Correlation-energy Formula into a Functional of the Electron Density. *Phys. Rev. B.* **1988**, *37*, 785-789.
- [6] Becke, A. D. A New Mixing of Hartree-Fock and Local Density-Functional Theories. *J. Chem. Phys.* **1993**, *98*, 1372-1377.
- [7] Grimme, S.; Antony, J.; Ehrlich, S.; Krieg, H. A Consistent and Accurate ab initio Parametrization of Density Functional Dispersion Correction (DFT-D) for the 94 Elements H-Pu. *J. Chem. Phys.* **2010**, *132*, 154104-154118.
- [8] Becke, A. D.; Johnson, E. R. A Density-functional Model of the Dispersion Interaction. *J Chem Phys.* **2005**, *122*, 154101.
- [9] Johnson, E. R.; Becke, A. D. Exchange-hole Dipole Moment and the Dispersion Interaction. *J Chem Phys.* **2005**, *122*, 154104.
- [10] Becke, A. D.; Johnson, E. R. Exchange-hole Dipole Moment and the Dispersion Interaction: High-order Dispersion Coefficients. *J Chem Phys.* **2006**, *124*, 014104.
- [11] Hehre, W. J.; Ditchfield, R.; Pople, J. A. Self-Consistent Molecular Orbital Methods. XII. Further Extensions of Gaussian-Type Basis Sets for Use in Molecular Orbital Studies of Organic Molecules. *J. Chem. Phys.* **1972**, *56*, 2257-2261.
- [12] Hariharan, P. C.; Pople, J. A. The Influence of Polarization Functions on Molecular Orbital Hydrogenation Energies. *Theor. Chim. Acta.* **1973**, *28*, 213-222.
- [13] Soitznel, G. W.; Clark, T.; Chandrasekhar, J.; Schlever, P. v. R. Stabilization of Methyl Anions by First-Row Substituents. The Superiority of Diffuse Function-

- Augmented Basis Sets for Anion Calculations. *J. Comput. Chem.* **1982**, *3*, 363-371.
- [14] Clark, T.; Chandrasekhar, G. W.; Suitznael, G. W.; Schleyer, P. v. R. Efficient Diffuse Function- Augmented Basis Sets for Anion Calculations. III.\* The 3-21+G Basis Set for First-Row Elements, Li-F. *J. Comput. Chem.* **1983**, *4*, 294-301.
- [15] Hay, P. J.; Wadt, W. R. Ab initio effective core potentials for molecular calculations. Potentials for the transition metal atoms Sc to Hg. *J. Chem. Phys.* **1985**, *82*, 270-283.
- [16] Momany, F. A.; Appell, M. A.; Strati, G. L.; Willett, J. L. B3LYP/6-311++G\*\* Study of Monohydrates of  $\alpha$ - and  $\beta$ -d-Glucopyranose: Hydrogen Bonding, Stress Energies, and Effect of Hydration on Internal Coordinates. *Carbohydr. Res.* **2004**, *339*, 553-567.
- [17] Momany, F. A.; Willett, J. L. Computational Studies on Carbohydrates: I. Density Functional Ab Initio Geometry Optimization on Maltose Conformations. *J. Comput. Chem.* **2000**, *21*, 1204-1219.
- [18] Lii, J.-H.; Ma, B.; Allinger, N. L. Importance of Selecting Proper Basis Set in Quantum Mechanical Studies of Potential Energy Surfaces of Carbohydrates. *J. Comput. Chem.* **1999**, *20*, 1593-1603.
- [19] Hoffman, M.; Rychlewski, J. Effects of Substituting a OH Group by a F Atom in D-Glucose. Ab Initio and DFT Analysis. *J. Am. Chem. Soc.* **2001**, *123*, *10*, 2308-2316.
- [20] Strati, G. L.; Willett, J. L.; Momany, F. A. Ab initio Computational Study of  $\beta$ -Cellobiose Conformers Using B3LYP/6-311++G. *Carbohydr. Res.* **2002**, *337*, 1833-1849.
- [21] Strati, G. L.; Willett, J. L.; Momany, F. A. A DFT/ab initio Study of Hydrogen Bonding and Conformational Preference in Model Cellobiose Analogs Using B3LYP/6-311++G\*\*. *Carbohydr. Res.* **2002**, *337*, 1851-1859.
- [22] Wieberg, K. B. Basis Set Effects on Calculated Geometries: 6-311++G\*\* vs. aug-cc-pVDZ. *J. Comput. Chem.* **2004**, *25*, 1342-1346.
- [23] Hemmingsen, L.; Madsen, D. E.; Esbensen, A. L.; Olsen, L.; Engelsen, S. B. Evaluation of Carbohydrate Molecular Mechanical Force Fields by Quantum Mechanical Calculations. *Carbohydr. Res.* **2004**, *339*, 937-948.
- [24] Andrae, D.; Häußermann, U.; Dolg, M.; Stoll, H.; Preuß, H. Energy-adjusted *ab initio* pseudopotentials for the second and third row transition elements. *Theoret. Chim. Acta.* **1990**, *77*, 123-141.
- [25] Zhao, Y.; Truhlar, D. The M06 Suite of Density Functionals for Main Group Thermochemistry, Thermochemical Kinetics, Non-covalent Interactions, Excited States, and Transition Elements: Two New Functionals and Systematic Testing of Four M06-Class Functionals and 12 Other Functionals. *Theor. Chem. Acc.* **2008**, *120*, 215-241.
- [26] Marenich, A. V.; Cramer, C. J.; Truhlar, D. G. Universal solvation model based on solute electron density and on a continuum model of the solvent defined by the bulk dielectric constant and atomic surface tensions. *J. Phys. Chem. B* **2009**, *113*, 6378-6396.
- [27] egault, C. Y. CYLview, 1.0b, Universitéde Sherbrooke, 2009. Available via the Internet at: <http://www.cylview.org>), accessed Aug. 7, 2022.
- [28] Humphrey, W.; Dalke, A.; Schulten, K. 'VMD - Visual Molecular Dynamics', *J.*

*Molec. Graphics.* **1996**, 14.1, 33-38.

[29] The PyMOL Molecular Graphics System, Version 2.0 Schrödinger, LLC Available via the Internet at:<http://www.pymol.org/pymol>, accessed June 16, 2022.

[30] Lefebvre, C.; Rubez, G.; Khartabil, H.; Boisson, J.-C.; Contreras-García J.; Hénon E. Accurately Extracting the Signature of Intermolecular Interactions Present in the NCI Plot of the Reduced Density Gradient versus Electron Density. *Phys. Chem. Chem. Phys.* **2017**, 19, 17928-17936.

[31] Lu, T., Chen, Q. X. Independent Gradient Model Based on Hirshfeld Partition: A New Method for Visual Study of Interactions in Chemical Systems. *J. Comput. Chem.*, **2022**, 43, 539-555.

[32] Lu, T.; Chen, F. W. Multiwfn: A Multifunctional Wavefunction Analyzer. *J. Comput. Chem.* **2012**, 33, 580-592.
